# Supplementary material for: The mechanistic study of novel immuno-adjuvant NCL-P2 improve the effectiveness of anti- PD-1 in colorectal cancer treatment through suppressing the expression of USP2
Source: Research Square preprint supplement (doi:10.21203/rs.3.rs-7274573/v1), 2025-10-17
Supplement: Supplementary file 1 [file 2c7028deb0c4fab20299f8f1.docx]

Supplementary Data

**The mechanistic study of novel immuno-adjuvant NCL-P2 improve the effectiveness of anti- PD-1 in colorectal cancer treatment through suppressing the expression of USP2**

Wu Shan 1,2 ， Zhang Miao1,2 ， Wang Huaqing 1,2*

*Correspondence to： Huaqing WANG; Email： huaqingw@163.com

1.Department of Oncology, Tianjin Union Medical Center, The First Affiliated Hospital of Nankai University, Tianjin 300121, China; 2.Tianjin Cancer Institute of Integrative Traditional Chinese and Western Medicine, Tianjin Union Medical Center, The First Affiliated Hospital of Nankai University, Tianjin 300121, China

Supplementary data for Figure 4.1

Detection of PD-L1 by western blotting. The original blot of 2 seperate experiments were shown here

NCL-P2(ug/ml)

con1 con 2

10 50 100 200


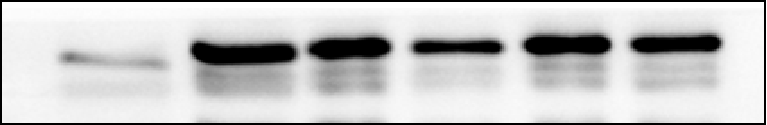

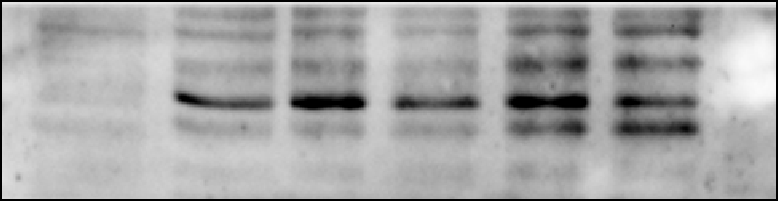


PD-L1

GAPDH

Experiment 1

con1 con 2

10 50 100 200

NCL-P2(ug/ml)

GAPDH

PD-L1


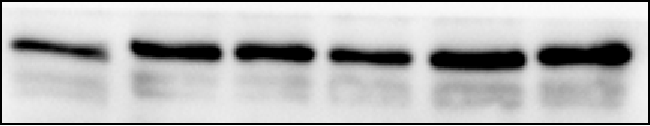

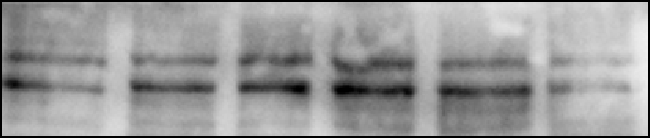


Experiment 2
