# Supplementary material for: The mechanistic study of novel immuno-adjuvant NCL-P2 improve the effectiveness of anti- PD-1 in colorectal cancer treatment through suppressing the expression of USP2
Source: Research Square preprint supplement (doi:10.21203/rs.3.rs-7274573/v1), 2025-10-17
Supplement: Supplementary file 2 [file 4a4320b53cffc9f28ddb96d0.xlsx]

## Sheet: tumor size（Figure 2）
		control			NCL-P2			anti-PD-1			NCL-P2 & anti-PD-1
	day 0	0.4	0.3	0.4	0.25	0.4	0.5	0.4	0.3	0.5	0.3	0.25	0.4
	day 5	0.658	0.785	0.602	0.48	0.54	0.464	0.442	0.45	0.509	0.35	0.285	0.4
	day 10	0.968	1.057	0.998	0.798	0.898	0.758	0.708	0.895	0.697	0.634	0.708	0.623
	day 15	1.456	1.145	1.35	0.948	1.05	0.854	0.978	0.8254	1.04	0.702	0.634	0.61
	day 20	1.907	1.708	1.567	1.67	1.558	1.289	1.543	1.409	1.421	1.001	0.958	1.109
	day 25	1.956	1.926	1.948	1.87	1.589	1.457	1.504	1.398	1.465	1.506	1.275	1.109

## Sheet: TNFa stimulation（Figure 1.1）
	NCL-P1			NCL-P2			NCL-P3
10	36.15	20.17	20.37	62.02	82.43	81.2	0	0	0
40	239.17	311.7	289.72	1495.22	996.16	787.88	0	0	0
160	253.32	349.81	345.97	1651.53	878.82	948.64	0	0	0
	NCL-P1			NCL-P2			NCL-P3
10	2.29	0	0.3	82.16	72.01	16.53	0	0	0
20	216.27	253.45	271.74	638.31	341.39	334.62	0	0	0
40	1987.68	3104.98	2678.85	11889	15645.1	12585.9	20.8	26.81	0
80	40297.1	40250.3	39366.2	40757.8	40302.9	40941.8	149.78	54.56	5.67
160	41579.4	40855	40692.8	40969.8	40672.1	40760.5	82.98	146.86	45.68
