# Supplementary material for: The mechanistic study of novel immuno-adjuvant NCL-P2 improve the effectiveness of anti- PD-1 in colorectal cancer treatment through suppressing the expression of USP2
Source: Research Square preprint supplement (doi:10.21203/rs.3.rs-7274573/v1), 2025-10-17
Supplement: Supplementary file 3 [file 561ded6bdf011216f2de9882.xlsx]

## Sheet: per qvalue<0.01
Checked	Contaminant	Modifications in Proteins	Positions in Proteins	Ions Score (by Search Engine): Mascot	Confidence	Annotated Sequence	Modifications	Qvality PEP	Qvality q-value	# Protein Groups	# Proteins	# PSMs	Master Protein Accessions	Protein Name	Gene Name	# Missed Cleavages	Theo. MH+ [Da]	# Razor Quan Results	Abundance Ratio: (127N) / (126)	Abundance Ratio: (127C) / (126)	Abundance Ratio: (128N) / (126)	Abundance Ratio: (128C) / (126)	Abundance Ratio: (129N) / (126)	Abundance Ratio: (129C) / (126)	Abundance Ratio: (130N) / (126)	Abundance Ratio: (130C) / (126)	Abundance Ratio: (131) / (126)	Abundance Ratio Adj. P-Value: (127N) / (126)	Abundance Ratio Adj. P-Value: (127C) / (126)	Abundance Ratio Adj. P-Value: (128N) / (126)	Abundance Ratio Adj. P-Value: (128C) / (126)	Abundance Ratio Adj. P-Value: (129N) / (126)	Abundance Ratio Adj. P-Value: (129C) / (126)	Abundance Ratio Adj. P-Value: (130N) / (126)	Abundance Ratio Adj. P-Value: (130C) / (126)	Abundance Ratio Adj. P-Value: (131) / (126)	Abundances (Grouped): 126	Abundances (Grouped): 127N	Abundances (Grouped): 127C	Abundances (Grouped): 128N	Abundances (Grouped): 128C	Abundances (Grouped): 129N	Abundances (Grouped): 129C	Abundances (Grouped): 130N	Abundances (Grouped): 130C	Abundances (Grouped): 131	Abundances (Scaled): F1: 126, Control, TR1	Abundances (Scaled): F2: 126, Control, TR2	Abundances (Scaled): F3: 126, Control, TR3
FALSE	FALSE	E5RI98 1xDeamidated [R78]; Q9BTI9 1xDeamidated [R76]; A4ZU86 1xDeamidated [R142]; P06748-2 A0A0S2Z4G7 1xDeamidated [R142]; Q9NX34 1xDeamidated [R62]; P06748-3 A0A140VJQ2 1xDeamidated [R142]; P06748 A0A0S2Z491 1xDeamidated [R142]	E5RI98 [40-78]; Q9BTI9 [38-76]; A4ZU86 [104-142]; P06748-2 A0A0S2Z4G7 [104-142]; Q9NX34 [24-62]; P06748-3 A0A140VJQ2 [104-142]; P06748 A0A0S2Z491 [104-142]		High	[K].CGSGPVHISGQHLVAVEEDAESEDEEEEDVKLLSISGKR.[S]	1xCarbamidomethyl [C1]; 1xDeamidated [R39]; 1xLRGG [K]; 1xTMT6plex [N-Term]	0.00179658	0.000226296	4	7	9	E5RI98; Q9BTI9; P06748-2 A0A0S2Z4G7; Q9NX34	Nucleophosmin (Fragment)	NPM1	2	4848.38	0	0.545	0.546	0.245	1.567	1.701	1.85	3.356	3.171	3.433										57.4	31.3	31.4	14.1	90	97.7	106.2	192.7	182.1	197.1	57.4
FALSE	FALSE		B9VP24 [43-77]		High	[K].QSKPVTTPEEIAQVATISASGDKEIGHILSDAVKK.[V]	1xGG [K]; 1xLRGG [K]; 2xTMT6plex [K3; K23]; 1xTMT6plex [N-Term]	0.0104939	0.00143492	1	1	4	B9VP24	60 kDa chaperonin (Fragment)	HSPD1	2	4832.71	1	1.277	1.174	1.447	0.935	0.752	0.687	0.853	0.671	0.634										106	135.4	124.5	153.4	99.1	79.8	72.8	90.5	71.1	67.3		106
FALSE	FALSE		Q16577 [156-191]		High	[K].DGNASGTTLLEALDCILPPTRPTDKPLGLPLQDVYK.[I]	1xCarbamidomethyl [C15]; 1xDeamidated [Q32]; 1xLRGG [K25]; 1xTMT6plex [K36]; 1xTMT6plex [N-Term]	0.0111852	0.00150388	1	1	1	Q16577	Elongation factor 1-alpha 1 (Eukaryotic translation elongation factor 1 alpha 1-like 14) (Longation factor 1-alpha 1)	PTI-1 EEF1A1L14	0	4721.56	0	1.071	1.142	1.052	0.725	0.71	0.821	1.155	1.197	1.101										100.3	107.4	114.5	105.5	72.7	71.2	82.3	115.8	120	110.4			100.3
FALSE	FALSE	C9JZW3 1xDeamidated [R117]; P24534 A0A024R3W7 1xDeamidated [R117]	C9JZW3 [79-117]; P24534 A0A024R3W7 [79-117]		High	[K].YGPADVEDTTGSGATDSKDDDDIDLFGSDDEEESEEAKR.[L]	1xDeamidated [R39]; 1xLRGG [K]; 1xTMT6plex [N-Term]	0.0115056	0.00154198	1	2	6	P24534 A0A024R3W7	Elongation factor 1-beta (EF-1-beta)	EEF1B2 EEF1B EF1B	2	4794.1	1	1.019	0.835	0.975	0.205	0.256	0.133	0.121	0.142	0.166	0.650137	0.383415	0.929372	0.0337707	0.0611048	0.0381829	0.0733703	0.0893609	0.0530798	210	200.9	175.4	205.5	43.1	43.6	31.1	25.8	29.7	34.8	204.6	227.7	166
FALSE	FALSE		Q92681 [203-231]		High	[R].QQNQHKIVDLEATMKGNGLPQNVDPPSAK.[K]	1xDeamidated [N/Q]; 2xLRGG [K6; K15]; 1xTMT6plex [K29]; 1xTMT6plex [N-Term]	0.0213513	0.0024753	1	1	14	Q92681	Regulatory solute carrier protein family 1 member 1 (Transporter regulator RS1) (hRS1)	RSC1A1	2	4383.37	0	0.916	0.944	0.795	2.806	2.631	3.567	2.227	2.173	1.698	0.396816	0.328309	0.503125	0.0715276	0.0716444	0.0383401	0.129133	0.111702	0.125056	52.9	42	50	42.1	148	136.8	188.9	108.7	135	95.7	54.2	63.6	34.9
FALSE	FALSE		Q9BTI9 [92-127]; A4ZU86 [158-193]; P06748-2 A0A0S2Z4G7 [158-193]; Q9NX34 [78-113]; P06748-3 A0A140VJQ2 [158-193]; P06748 A0A0S2Z491 [158-193]		High	[K].LAADEDDDDDDEEDDDEDDDDDDFDDEEAEEKAPVK.[K]	1xGG [K]; 1xLRGG [K]; 1xTMT6plex [N-Term]	0.0596736	0.00552667	3	6	6	Q9BTI9; P06748-2 A0A0S2Z4G7; Q9NX34	NPM1 protein (Fragment)	NPM1	1	4844.89	0	0.326	0.7	0.346	1.71	1.512	1.765	4.659	4.092	5.709										45.8	14.9	32.1	15.9	78.4	69.3	80.9	213.5	187.5	261.6	45.8
FALSE	FALSE		Q06830 [159-192]; A0A0A0MRQ5 [57-90]		High	[R].LVQAFQFTDKHGEVCPAGWKPGSDTIKPDVQKSK.[E]	1xCarbamidomethyl [C15]; 1xGG [K]; 2xTMT6plex [K10; K20]; 1xTMT6plex [N-Term]	0.0836289	0.00703382	1	2	5	Q06830	Peroxiredoxin-1 (EC 1.11.1.15) (Natural killer cell-enhancing factor A) (NKEF-A) (Proliferation-associated gene protein) (PAG) (Thioredoxin peroxidase 2) (Thioredoxin-dependent peroxide reductase 2)	PRDX1 PAGA PAGB TDPX2	2	4600.46	0	1.938	1.946	2.698	1.094	1.181	0.811	0.787	0.919	0.704										76.5	148.2	148.8	206.3	83.7	90.3	62	60.2	70.3	53.8	79.9		73
FALSE	FALSE	Q8N4C6-6 2xDeamidated [R]; Q8N4C6-7 2xDeamidated [R]; C9J066 2xDeamidated [R]; Q8N4C6-4 2xDeamidated [R]; Q8N4C6-10 2xDeamidated [R]; Q5XUU0 2xDeamidated [R]; Q8N4C6-2 2xDeamidated [R]; Q8N4C6-9 2xDeamidated [R]; Q8N4C6-11 2xDeamidated [R]; Q8N4C6-5 2xDeamidated [R]; Q8N4C6 2xDeamidated [R]; E9PN67 2xDeamidated [R]; H9KV85 2xDeamidated [R]; H0YDJ4 2xDeamidated [R]	Q8N4C6-6 [893-909]; Q8N4C6-7 [1607-1623]; C9J066 [1607-1623]; Q8N4C6-4 [1590-1606]; Q8N4C6-10 [1590-1606]; Q5XUU0 [1607-1623]; Q8N4C6-2 [1590-1606]; Q8N4C6-9 [1569-1585]; Q8N4C6-11 [894-910]; Q8N4C6-5 [1613-1629]; Q8N4C6 [1607-1623]; E9PN67 [1607-1623]; H9KV85 [1098-1114]; H0YDJ4 [1098-1114]		High	[K].LQELNQRLTEMLCQKEK.[E]	1xCarbamidomethyl [C13]; 2xDeamidated [Q14; Q/R]; 1xLRGG [K15]; 1xTMT6plex [K17]; 1xTMT6plex [N-Term]	0.105272	0.00857164	3	14	15	Q8N4C6-7; Q5XUU0; Q8N4C6-9	Ninein	NIN	2	3004.63	4	1.069	0.823	0.895	0.269	0.185	0.089	0.042	0.049	0.028	0.178221	0.0986407	0.23134	0.0547357	0.0440845	0.0237748	0.0369937	0.0351873	0.0422058	224.4	239.8	186.3	200.5	60.3	41.4	20.6	9.4	11.1	6.2	223.9	231.6	224.3
FALSE	FALSE		A3KN83-3 [982-1010]; A3KN83-2 [983-1011]; A3KN83 [984-1012]; B3KUC1 [95-123]		High	[R].SNQVTAPEYVFLISELAGEQRFASIVAKR.[L]	1xDeamidated [N/Q]; 1xGG [K28]; 1xTMT6plex [N-Term]	0.120724	0.00971315	1	4	4	A3KN83	Protein strawberry notch homolog 1 (Monocyte protein 3) (MOP-3)	SBNO1 MOP3	2	3567.9	1	0.598	1.039	0.709	20.396	21.185	22.854	19.485	18.374	17.495										8.1	4.9	8.4	5.8	165.6	172	185.6	158.2	149.2	142.1		7.1	9.2
FALSE	FALSE		P11021 V9HWB4 [345-367]		High	[K].VLEDSDLKKSDIDEIVLVGGSTR.[I]	1xGG [K]; 1xLRGG [K]; 1xTMT6plex [N-Term]	0.121416	0.00975437	1	1	2	P11021 V9HWB4	Endoplasmic reticulum chaperone BiP (EC 3.6.4.10) (78 kDa glucose-regulated protein) (GRP-78) (Binding-immunoglobulin protein) (BiP) (Heat shock protein 70 family protein 5) (HSP70 family protein 5) (Heat shock protein family A member 5) (Immunoglobulin heavy chain-binding protein)	HSPA5 GRP78	2	3214.75	0	0.916	1.054	1.058	0.883	0.695	0.616	0.593	0.654	0.554										124.6	114.2	131.3	131.9	110.1	86.7	76.8	73.9	81.5	69		124.6
FALSE	FALSE		Q9BQ02 [247-258]; B3KM80 [301-312]; P19338 A0A024R4A0 [475-486]; Q6ZS99 [368-379]; B3KTP9 [398-409]	40	High	[R].GGKNSTWSGESK.[T]	1xDeamidated [N4]; 1xGG [K3]; 1xTMT6plex [K12]; 1xTMT6plex [N-Term]	0.00184095	0.000226296	3	5	8	Q9BQ02; B3KM80; Q6ZS99	NCL protein		1	1810.93	2	0.852	0.98	0.787	2.677	3.088	3.631	14.674	10.643	13.716	0.309397	0.684827	0.519744	0.0695999	0.0524201	0.0390666	0.0428548	0.039181	0.0347149	18.8	18.2	19.5	17.2	45.8	58.2	68.4	276.6	202.3	274.9	19.1	22.1	10.1
FALSE	FALSE		H7C2W9 [81-103]; P62899 [93-115]; Q76N53 [15-37]; B7Z4C8 [93-115]; P62899-2 [93-115]; C9JU56 [93-115]; B7Z4E3 [93-115]; P62899-3 [93-115]; B2R4C1 [93-115]	34	High	[R].NEDEDSPNKLYTLVTYVPVTTFK.[INS-]	2xDeamidated [N1; N8]; 1xGG [K9]; 1xTMT6plex [K23]; 1xTMT6plex [N-Term]	0.0893849	0.00740207	3	9	2	B7Z4C8; B7Z4E3; B2R4C1	cDNA FLJ57527, highly similar to 60S ribosomal protein L31	RPL31	1	3247.67	0	0.995	1.265	1.072	0.729	0.811	0.591	0.615	0.705	0.6										119.3	118.7	150.9	127.9	87	96.7	70.5	73.3	84.1	71.6			119.3
FALSE	FALSE		Q2QD09 [220-248]	33	High	[K].ELASQPGVDGFLVGGASLKPEFVDIINAK.[Q]	1xDeamidated [Q5]; 1xGG [K19]; 1xTMT6plex [K29]; 1xTMT6plex [N-Term]	0.000289887	8.30847e-05	1	1	18	Q2QD09	Triosephosphate isomerase (EC 5.3.1.1) (Fragment)		0	3544.93	0	1.076	0.972	1.053	0.537	0.393	0.375	0.343	0.241	0.27										159.7	172	155.2	168.2	85.9	62.8	59.9	54.8	38.5	43.1		144.4	167.9
FALSE	FALSE		P84243 B2R4P9 [74-84]; B2R6Y1 [74-84]; K7ES00 [74-84]; B4DEB1 [74-84]; Q6TXQ4 [59-69]; Q16695 [74-84]; K7EK07 [74-84]; K7EMV3 [74-84]; A8K4Y7 [74-84]; P68431 [74-84]; Q71DI3 [74-84]; B4E380 [74-84]	32	High	[R].EIAQDFKTDLR.[F]	1xGG [K7]; 1xTMT6plex [N-Term]	0.0572407	0.00538972	4	12	2	B2R6Y1; B4DEB1; P68431; Q71DI3	Histone H3		1	1678.9	0	0.957	1.082	1.33	1.564	1.451	2.233	1.781	1.889	1.75										66.5	63.7	72	88.5	104	96.5	148.5	118.4	125.6	116.3		66.5
FALSE	FALSE		Q53HR1 [171-194]	29	High	[R].VEAGVLKPGMVVTFAPVNVTTEVK.[S]	1xOxidation [M10]; 1xGG [K7]; 1xTMT6plex [K24]; 1xTMT6plex [N-Term]	0.0038801	0.00061912	1	1	10	Q53HR1	Eukaryotic translation elongation factor 1 alpha 1 variant (Fragment)		0	3073.74	0	1.431	1.751	2.123	0.836	0.624	0.768	0.412	0.298	0.225										105.6	151.1	184.9	224.3	88.3	65.9	81.2	43.5	31.5	23.7		105.6
FALSE	FALSE		Q16577 [203-226]	26	High	[R].VETGVLKPGMVVTFGPVNVTTEVK.[S]	1xGG [K]; 1xTMT6plex [K]; 1xTMT6plex [N-Term]	0.000788437	0.000139307	1	1	14	Q16577	Elongation factor 1-alpha 1 (Eukaryotic translation elongation factor 1 alpha 1-like 14) (Longation factor 1-alpha 1)	PTI-1 EEF1A1L14	0	3073.74	3	1.712	1.212	1.899	1.056	1.504	1.46	2.229	2.142	2.207	0.178886	0.255386	0.125052	0.244311	0.0440646	0.0500808	0.0300733	0.026008	0.0295804	59.4	101.7	75.9	112.8	70	88	86.8	136.5	140.6	128.2	57.9	59.2	66
FALSE	FALSE		B7Z4F6 [504-531]; B3GQS7 [527-554]; B7Z5E7 [471-498]; B7Z597 [518-545]; P10809 A0A024R3X4 [527-554]	26	High	[R].TALLDAAGVASLLTTAEVVVTEIPKEEK.[D]	1xGG [K]; 1xTMT6plex [N-Term]	0.00135078	0.000207342	3	5	4	B7Z4F6; B3GQS7; B7Z597	cDNA FLJ54912, highly similar to 60 kDa heat shock protein, mitochondrial		1	3211.79	0	1.319	1.317	1.311	0.812	0.792	0.631	0.508	0.384	0.388										118.2	155.9	155.6	154.9	95.9	93.6	74.6	60.1	45.3	45.8			118.2
FALSE	FALSE		Q16778 [45-58]; Q5QNW6 [45-58]; Q99879 [45-58]; P33778 [45-58]; P58876 A0A024QZZ7 [45-58]; Q96A08 [46-59]; B4DR52 [45-58]; Q93079 [45-58]; O60814 A0A024RCL8 [45-58]; Q99880 [45-58]; I6L9F7 [45-58]; Q5QNW6-2 [45-58]; P62807 B2R4S9 [45-58]; Q0D2M2 [45-58]; P57053 [45-58]; Q8N257 [45-58]; P06899 A0A024RCJ2 [45-58]; P23527 [45-58]; U3KQK0 [45-58]; Q99877 A0A024RCJ9 [45-58]; A8K9J7 [45-58]	23	High	[K].VLKQVHPDTGISSK.[A]	1xDeamidated [Q4]; 1xGG [K3]; 1xTMT6plex [K14]; 1xTMT6plex [N-Term]	0.0893849	0.00740207	6	21	4	Q96A08; B4DR52; O60814 A0A024RCL8; I6L9F7; Q8N257; U3KQK0	Histone H2B type 1-A (Histone H2B, testis) (TSH2B.1) (hTSH2B) (Testis-specific histone H2B)	HIST1H2BA TSH2B	1	2082.2	0	0.845	0.91	0.986	1.143	1.388	1.707	1.699	1.593	2.258										73.9	62.4	67.2	72.9	84.5	102.6	126.2	125.6	117.7	166.9		61.8	87.6
FALSE	FALSE		A0A0A0MRM9 [234-240]; S4R3C2 [216-222]; Q14978 [235-241]; B2RAU8 [235-241]; Q14978-2 [235-241]; S4R349 [128-134]; Q14978-3 [236-242]	23	High	[K].AAATPKK.[VT]	1xGG [K6]; 1xTMT6plex [K7]; 1xTMT6plex [N-Term]	0.0934801	0.00771328	5	7	24	S4R3C2; B2RAU8; Q14978-2; S4R349; Q14978-3	Nucleolar and coiled-body phosphoprotein 1 (Fragment)	NOLC1	1	1258.79	0	0.878	0.832	0.796	2.797	3.001	3.142	4.793	4.188	6.286	0.484891	0.127221	0.212972	0.0232272	0.025765	0.0209782	0.0281911	0.0258065	0.0252383	36.9	28.3	29	28.5	97.2	103	109.6	180.5	154.7	232.3	31.8	36.4	37.7
FALSE	FALSE		P63267 [212-239]; A8K3K1 [213-240]; B7Z6P1 [179-206]; B3KPP5 [22-49]; P63267-2 [169-196]; B3KUD3 [178-205]; P62736 D2JYH4 [213-240]; P68133 [213-240]; B4DUI8 [168-195]; B3KW67 [212-239]; P68032 [213-240]	22	High	[R].DIKEKLCYVALDFENEMATAASSSSLEK.[S]	1xCarbamidomethyl [C7]; 1xDeamidated [N15]; 1xGG [K]; 2xTMT6plex [K28; K]; 1xTMT6plex [N-Term]	0.0163873	0.00195576	3	11	6	B7Z6P1; B3KUD3; B4DUI8	cDNA FLJ53662, highly similar to Actin, alpha skeletal muscle		2	3952.02	0	1.851	1.211	1.402	0.824	0.937	0.979	1.097	1.084	1.14										86.8	160.6	105.1	121.6	71.5	81.3	85	95.2	94.1	98.9	86.8
FALSE	FALSE		H7BY16 [1-21]	20	High	[-].LPYKVTQDELKEVFEDAAEIR.[L]	1xDeamidated [Q7]; 1xGG [K4]; 1xTMT6plex [K11]; 1xTMT6plex [N-Term]	0.00292549	0.000466876	1	1	1	H7BY16	Nucleolin (Fragment)	NCL	2	3066.64	1	0.727	0.891	0.908	3.433	2.97	2.31	2.611	1.463	13.825										33.2	24.1	29.6	30.1	113.9	98.6	76.6	86.6	48.5	458.8		33.2
FALSE	FALSE		Q16577 [203-226]	20	High	[R].VETGVLKPGMVVTFGPVNVTTEVK.[S]	1xOxidation [M10]; 1xGG [K7]; 1xTMT6plex [K24]; 1xTMT6plex [N-Term]	0.0198469	0.00233577	1	1	6	Q16577	Elongation factor 1-alpha 1 (Eukaryotic translation elongation factor 1 alpha 1-like 14) (Longation factor 1-alpha 1)	PTI-1 EEF1A1L14	0	3089.73	0	1.352	1.27	1.705	0.646	0.579	0.527	0.48	0.573	0.48	0.111889	0.0971618	0.141964	0.0999165	0.0953565	0.0311612	0.0569669	0.0640547	0.0410285	114.2	153.5	144.2	193.6	80.1	65.7	64.6	59.5	65	59.6	112.5	111.9	122.2
FALSE	FALSE		Q9UKK3 [1153-1164]	20	High	[K].QTLKSLIIKLSK.[E]	1xDeamidated [Q1]; 1xGG [K4]; 2xTMT6plex [K9; K12]; 1xTMT6plex [N-Term]	0.0349037	0.00348815	1	1	5	Q9UKK3	Poly [ADP-ribose] polymerase 4 (PARP-4) (EC 2.4.2.30) (193 kDa vault protein) (ADP-ribosyltransferase diphtheria toxin-like 4) (ARTD4) (PARP-related/IalphaI-related H5/proline-rich) (PH5P) (Vault poly(ADP-ribose) polymerase) (VPARP)	PARP4 ADPRTL1 KIAA0177 PARPL	2	2174.41	1	1.026	1.22	1.098	0.5	0.597	0.528	0.133	0.172	0.175										155.1	159.1	189.1	170.3	77.5	92.5	81.9	20.6	26.6	27.2			155.1
FALSE	FALSE		P78348-1 [134-155]; P78348 [134-155]; F8VSK4 [134-155]; A8K1U5 [134-155]	20	High	[K].QLEILQDKANFRSFKPKPFNMR.[E]	2xDeamidated [N10; Q/N]; 1xGG [K]; 2xTMT6plex [K]; 1xTMT6plex [N-Term]	0.0618996	0.00563055	1	4	14	F8VSK4	Acid-sensing ion channel 1	ASIC1	2	3510.95	3	1.274	1.621	1.585	0.794	0.745	0.455	0.141	0.15	0.121										126.8	161.6	205.6	201	100.7	94.5	57.7	17.9	19	15.3	127.5	125
FALSE	FALSE		B4DTV0 [764-784]; [892-912]; Q09666 [764-784]; [892-912]; [2525-2545]; Q8N274 [614-634]	20	High	[K].AEGPEVDVNLPKADVDISGPK.[IV]	1xGG [K12]; 1xTMT6plex [K21]; 1xTMT6plex [N-Term]	0.106477	0.00868577	2	3	2	B4DTV0; Q09666	cDNA FLJ57801, highly similar to Homo sapiens AHNAK nucleoprotein (desmoyokin) (AHNAK), transcript variant 1, mRNA (Fragment)		1	2722.47	0	1.207	0.709	0.835	0.234	0.229	0.177	0.141	0.147	0.122										208.3	251.6	147.6	173.9	48.7	47.8	36.9	29.3	30.6	25.3	208.3
FALSE	FALSE		Q96QV6 [83-119]; P16104 [83-119]	20	High	[R].HLQLAIRNDEELNKLLGGVTIAQGGVLPNIQAVLLPK.[K]	1xGG [K14]; 1xTMT6plex [K37]; 1xTMT6plex [N-Term]	0.118672	0.00954209	2	2	1	Q96QV6; P16104	Histone H2A type 1-A (Histone H2A/r)	HIST1H2AA H2AFR	2	4517.63	1	1.467	1.828	1.863	3.654	3.797	3.039	2.13	1.708	4.385										40.2	59	73.5	74.9	146.9	152.7	122.2	85.6	68.7	176.3			40.2
FALSE	FALSE		H7BZ39 [120-142]; B4DV69 [458-480]; Q8N5V2-3 [476-498]; B4DDI2 [291-313]; B4DPF7 [568-590]; Q8N5V2 [568-590]	16	High	[R].LLENADDREATYMLKASSQSEMK.[R]	2xDeamidated [N4; Q19]; 2xOxidation [M13; M22]; 1xGG [K15]; 1xTMT6plex [K23]; 1xTMT6plex [N-Term]	0.0618996	0.00563055	4	6	12	H7BZ39; B4DV69; B4DDI2; B4DPF7	Ephexin-1 (Fragment)	NGEF	2	3236.57	9	1.12	1.078	1.168	0.556	0.448	0.402	0.391	0.341	0.3	0.234836	0.548359	0.363872	0.0484117	0.0464317	0.0304437	0.0519882	0.0532761	0.0475723	144.7	179.2	158.1	169	79	64.8	58.6	55.6	48.4	42.6	141.4	143.8	170.7
FALSE	FALSE		B3KW67 [314-327]; L0R5C4 [384-397]	16	High	[R].MQKEIAALAPSTMK.[I]	1xOxidation [M1]; 1xGG [K3]; 1xTMT6plex [K14]; 1xTMT6plex [N-Term]	0.0800344	0.00675267	1	2	6	L0R5C4	Alternative protein POTEM	POTEM	1	2107.17	0	1.291	1.725	2.346	0.853	0.982	0.905	2.479	1.801	2.067										64.7	83.6	111.7	151.8	55.2	63.6	58.6	160.4	116.6	133.8	67.6		61.5
FALSE	FALSE		P46013 [2861-2880]; P46013-2 [2501-2520]	15	High	[K].LTQTSGETTHTDKEPVGEGK.[G]	2xGG [K13; K20]; 1xTMT6plex [N-Term]	0.000414792	9.5998e-05	1	2	8	P46013	Proliferation marker protein Ki-67 (Antigen identified by monoclonal antibody Ki-67) (Antigen KI-67) (Antigen Ki67)	MKI67	1	2572.27	1	0.677	0.858	0.651	2.969	2.947	2.876	2.681	2.822	2.776	0.245803	0.317359	0.16248	0.0410223	0.044106	0.0453574	0.0446363	0.0433551	0.0507446	49.1	33.9	42.1	32.6	148.6	144.7	141.3	129.5	141.2	137	49.6	50.5	35.2
FALSE	FALSE	Q53G89 1xDeamidated [R]	Q53G89 [191-226]	14	High	[K].DGNASGTTLLEALDCILPPTRPTDKPLRLPLQGVYK.[I]	1xCarbamidomethyl [C15]; 1xDeamidated [Q/R]; 1xGG [K]; 1xTMT6plex [K]; 1xTMT6plex [N-Term]	0.000121164	7.51451e-05	1	1	26	Q53G89	Elongation factor 1-alpha (Fragment)		1	4493.45	0	1.013	1.075	1.13	0.943	0.921	1.117	0.635	0.686	0.619	0.360995	0.363942	0.281317	0.548095	0.964901	0.879669	0.0409961	0.0875799	0.0428145	112.1	114.4	112.3	117.6	105.4	103.9	124.1	64.1	76.8	69.2	101.4	113.6	112.8
FALSE	FALSE		Q15735-3 [16-45]; Q15735 [16-45]	14	High	[R].AGLGSLPMPQGVAQTGAPSKVDSSFQLPAK.[K]	1xGG [K20]; 1xTMT6plex [K30]; 1xTMT6plex [N-Term]	0.0178191	0.00210205	1	2	4	Q15735	Phosphatidylinositol 4,5-bisphosphate 5-phosphatase A (EC 3.1.3.56) (Inositol polyphosphate 5-phosphatase J)	INPP5J PIB5PA PIPP	1	3511.9	0	1.107	1.336	1.135	1.349	1.226	1.466	1.629	1.708	1.466										74.5	82.5	99.6	84.6	100.5	91.3	109.2	121.4	127.2	109.2	73.8	75
FALSE	FALSE	Q53G89 1xDeamidated [R]	Q53G89 [190-226]	13	High	[R].KDGNASGTTLLEALDCILPPTRPTDKPLRLPLQGVYK.[I]	1xCarbamidomethyl [C16]; 1xDeamidated [R/Q]; 1xGG [K]; 2xTMT6plex [K1; K]; 1xTMT6plex [N-Term]	0.00012117	8.17919e-05	1	1	4	Q53G89	Elongation factor 1-alpha (Fragment)		2	4850.71	0	1.174	1.238	1.145	0.633	0.584	0.602	0.403	0.445	0.503										129.4	151.9	160.2	148.2	82	75.6	77.9	52.1	57.6	65.1		129.4
FALSE	FALSE	Q59GR8 1xDeamidated [R]	Q59GR8 [128-147]	10	High	[R].LATALQKLEEAEKAADGSER.[G]	1xDeamidated [Q/R]; 1xGG [K]; 1xTMT6plex [K]; 1xTMT6plex [N-Term]	0.0073885	0.0010415	1	1	13	Q59GR8	TPM1 protein variant (Fragment)		2	2703.46	0	1.268	1.21	1.309	0.438	0.436	0.322	0.319	0.277	0.268	0.252264	0.155114	0.185299	0.0345091	0.0389599	0.026592	0.0747398	0.0264377	0.0767725	146.7	185.8	180.2	189.6	59.6	70.5	43.8	43.3	44.1	36.4	137.4	148.3	163.4
FALSE	FALSE		Q5TEC6 [28-41]; Q16695 [28-41]; P68431 [28-41]; Q71DI3 [28-41]	10	High	[R].KSAPATGGVKKPHR.[Y]	1xGG [K]; 2xTMT6plex [K]; 1xTMT6plex [N-Term]	0.0268611	0.002897	3	4	6	Q5TEC6; P68431; Q71DI3	Histone H3	HIST2H3PS2 RP5-998N21.6-001	2	2235.37	0	0.151	0.142	0.256	0.186	0.369	2.671	3.511	4.015	4.285										60.3	9.1	8.6	15.4	11.2	22.3	161.1	211.7	242.1	258.3	75.7		37.4
FALSE	FALSE		Q8NGS8 [245-263]	10	High	[R].LTVVITFCGTIFLMYMKPK.[S]	1xCarbamidomethyl [C8]; 1xGG [K17]; 1xTMT6plex [K19]; 1xTMT6plex [N-Term]	0.124935	0.00997796	1	1	7	Q8NGS8	Olfactory receptor 13C5 (Olfactory receptor OR9-11)	OR13C5	0	2834.58	0	1.22	1.362	1.212	0.448	0.554	0.306	0.178	0.212	0.157	0.212982	0.104092	0.184346	0.084633	0.0522658	0.0657962	0.0282014	0.0546963	0.0545845	146.7	187	206.1	179.4	70.3	81.2	47.8	26.1	30.8	24.7	144.4	145.6	155.6
FALSE	FALSE		Q9BTI9 [141-155]; A4ZU86 [207-221]; Q9NX34 [127-141]; V9HVU7 [131-145]; P06748-3 A0A140VJQ2 [207-221]; P06748 A0A0S2Z491 [207-221]; A0A024RAP1 [131-145]	8	High	[K].SNQNGKDSKPSSTPR.[S]	2xDeamidated [Q/N]; 1xGG [K6]; 1xTMT6plex [K9]; 1xTMT6plex [N-Term]	0.0104113	0.00142408	4	7	39	Q9BTI9; Q9NX34; V9HVU7; A0A024RAP1	NPM1 protein (Fragment)	NPM1	1	2177.12	0	0.727	0.598	0.686	3.584	3.322	4.274	10.793	9.308	13.199	0.177642	0.116385	0.198768	0.0403837	0.0394029	0.0254865	0.0316637	0.0222041	0.0255076	21.1	12.7	12.6	12.9	76.7	72.9	84.5	232.2	196.2	278.3	16.1	21.1	23
FALSE	FALSE		Q6W2J9-3 [881-916]; Q6W2J9 [881-916]; E3UVQ2 [881-916]; Q6W2J9-4 [881-916]; Q6W2J9-2 [881-916]; H9A532 [881-916]; A1A564 [288-323]; H7BYY2 [881-916]	8	High	[K].DSVLAGTNKENLGLPVSTPFLEPPLGSDGPAVTFGK.[T]	1xGG [K9]; 1xTMT6plex [K36]; 1xTMT6plex [N-Term]	0.108312	0.00880536	2	8	3	A1A564; H7BYY2	BCL-6 corepressor (BCOR protein)	BCOR	1	4197.25	2	1.002	1.154	1.132	1.724	1.949	1.781	2.674	1.882	2.174										60.7	60.8	70.1	68.7	104.7	118.3	108.1	162.3	114.3	132	59.2	61.8
FALSE	FALSE		B4DDX2 [57-91]	6	High	[R].ASPATQPPPLLPPSATASVKMEPENKYLPELMAEK.[D]	1xDeamidated [N25]; 2xGG [K]; 1xTMT6plex [N-Term]	0.0247812	0.00277046	1	1	10	B4DDX2	cDNA FLJ54590, highly similar to KH domain-containing, RNA-binding, signaltransduction-associated protein 1		2	4191.16	1	0.766	0.978	0.777	1.492	1.793	1.897	1.586	2.115	1.899										69.9	53.6	68.4	54.3	104.3	125.3	132.6	110.9	147.9	132.8		63.1	77.1
FALSE	FALSE		P16401 [67-82]	6	High	[K].KALAAGGYDVEKNNSR.[I]	1xGG [K12]; 1xTMT6plex [K1]; 1xTMT6plex [N-Term]	0.0508481	0.00497388	1	1	4	P16401	Histone H1.5 (Histone H1a) (Histone H1b) (Histone H1s-3)	HIST1H1B H1F5	2	2265.24	2	0.864	0.916	1.055	1.436	1.652	1.92	1.418	2.135	1.988	0.544718	0.543241	0.592821	0.668357	0.762639	0.846436	0.623537	0.769249	0.0228389	69.6	60	63.7	73.4	99.7	114.8	133.6	98.6	148.5	138.1	257.4	67.9	68
FALSE	FALSE		Q9H5E0 [101-122]	5	High	[K].QLFHPMSLLKHNPPTHSHPSPK.[L]	1xOxidation [M6]; 1xGG [K]; 1xTMT6plex [N-Term]	0.0524347	0.00509886	1	1	12	Q9H5E0	cDNA: FLJ23531 fis, clone LNG06065		1	2889.51	0	1.257	1.341	1.285	0.526	0.587	0.37	0.351	0.357	0.281	0.110722	0.129952	0.127097	0.0715071	0.116285	0.104464	0.0312939	0.0532463	0.0492035	135.6	170.4	182.7	175.1	71.6	79.6	50.4	47.9	48.3	38.4	122	136.7	137.4
FALSE	FALSE		Q96EP5-2 [115-135]; Q96EP5 A0A0S2Z569 [115-135]; K7EQ55 [115-135]; Q5IRN2 [115-135]; K7EK33 [114-134]; K7EQ02 [93-113]	5	High	[K].IFVGGIPHNCGETELREYFKK.[F]	1xCarbamidomethyl [C10]; 1xGG [K20]; 1xTMT6plex [K21]; 1xTMT6plex [N-Term]	0.0903889	0.00747142	2	6	4	Q96EP5-2; K7EK33	DAZ-associated protein 1	DAZAP1	2	3066.62	0	0.983	1.007	1.091	0.654	1.053	0.887	0.673	0.492	0.877										114.7	112.8	115.5	125.2	75	120.8	101.8	77.2	56.5	100.6	114.7
FALSE	FALSE		Q59GP7 [283-317]; Q12906 A0A024R7C7 [274-308]; F4ZW64 [274-308]; Q12906-5 [274-308]; Q12906-7 [274-308]; Q12906-6 [274-308]; F4ZW66 [274-308]; Q12906-4 [274-308]; A8K590 [274-308]; Q12906-2 [274-308]; Q12906-3 [274-308]	5	High	[R].RVLECLASGIVMPDGSGIYDPCEKEATDAIGHLDR.[Q]	2xCarbamidomethyl [C5; C22]; 1xOxidation [M12]; 1xGG [K24]; 1xTMT6plex [N-Term]	0.120724	0.00971315	3	11	2	Q59GP7; F4ZW66; A8K590	Interleukin enhancer binding factor 3 isoform c variant (Fragment)		2	4204.03	0	0.82	0.948	0.918	0.828	1.419	0.799	0.558	0.738	0.536										116.8	95.8	110.7	107.2	96.7	165.7	93.3	65.1	86.2	62.6		116.8
FALSE	FALSE		B1APP6 [50-73]; V9GY25 [50-73]; Q01813 [266-289]; Q01813-2 [258-281]	3	High	[R].LNIIIVAEGAIDTQNKPITSEKIK.[E]	1xDeamidated [N/Q]; 2xGG [K]; 1xTMT6plex [N-Term]	0.00916215	0.00128225	2	4	8	Q01813; Q01813-2	ATP-dependent 6-phosphofructokinase, platelet type (ATP-PFK) (PFK-P) (EC 2.7.1.11) (6-phosphofructokinase type C) (Phosphofructo-1-kinase isozyme C) (PFK-C) (Phosphohexokinase)	PFKP PFKF	1	3066.72	0	1.164	1.275	1.248	1.194	1.045	1.128	0.947	1.219	0.835										90.5	105.3	115.3	112.9	108	94.6	102.1	85.6	110.3	75.5	90.5
FALSE	FALSE		B4E1L2 [107-127]	3	High	[R].QPAVFPVQIKDSSPTCVACVR.[G]	2xCarbamidomethyl [C16; C19]; 1xDeamidated [Q1]; 1xGG [K10]; 1xTMT6plex [N-Term]	0.107085	0.00870136	1	1	18	B4E1L2	cDNA FLJ59602, highly similar to Lactotransferrin (EC 3.4.21.-)		1	2703.38	6	1.245	1.399	1.393	0.652	0.504	0.466	0.539	0.416	0.378	0.136675	0.0988224	0.108468	0.0236449	0.0248072	0.0295091	0.0479326	0.0301579	0.0285898	125.1	155.7	175.1	174.3	81.6	63.1	58.4	67.4	52.1	47.3	126.3	126.5	126.2
FALSE	FALSE	E7EUT5 1xDeamidated [R173]; P04406-2 1xDeamidated [R206]; Q2TSD0 1xDeamidated [R248]; Q5ZEY3 1xDeamidated [R55]; P04406 V9HVZ4 1xDeamidated [R248]	E7EUT5 [160-184]; P04406-2 [193-217]; Q2TSD0 [235-259]; Q5ZEY3 [42-66]; P04406 V9HVZ4 [235-259]	2	High	[R].VPTANVSVVDLTCRLEKPAKYDDIK.[K]	1xCarbamidomethyl [C13]; 1xDeamidated [R14]; 2xGG [K20; K]; 1xTMT6plex [K]; 1xTMT6plex [N-Term]	0.00171665	0.000226296	2	5	5	E7EUT5; Q2TSD0	Glyceraldehyde-3-phosphate dehydrogenase	GAPDH	2	3518.89	1	1.235	0.971	1.002	0.193	0.257	0.096	0.065	0.096	0.095	0.16952	0.823411	0.643476	0.0210977	0.0877276	0.0347131	0.0378072	0.0215091	0.0292281	201.3	248.6	185.2	204.1	38.9	51.7	18.3	13.3	19.2	19.4	189.4	202.2	199.9
FALSE	FALSE		P27694 [184-202]	1	High	[K].VVPIASLTPYQSKWTICAR.[V]	1xCarbamidomethyl [C17]; 1xGG [K13]; 1xTMT6plex [N-Term]	0.0243192	0.00272197	1	1	3	P27694	Replication protein A 70 kDa DNA-binding subunit (RP-A p70) (Replication factor A protein 1) (RF-A protein 1) (Single-stranded DNA-binding protein) [Cleaved into: Replication protein A 70 kDa DNA-binding subunit, N-terminally processed]	RPA1 REPA1 RPA70	1	2533.38	0	1.249	1.074	1.107	0.214	0.197	0.066	0.079	0.063	0.057										195.9	244.5	210.4	216.8	41.8	38.7	13	15.5	12.4	11.1	206	184.1
FALSE	FALSE		C0JYZ2 [11056-11063]; Q8WZ42-2 [11891-11898]; Q8WZ42-10 [4684-4691]; Q8WZ42 [11983-11990]; Q8WZ42-9 [4751-4758]; Q8WZ42-7 [11248-11255]; Q8WZ42-3 [4559-4566]; D3DPG0 [12575-12582]; Q8WZ42-11 [11056-11063]; A0A0A0MRA3 [4751-4758]; Q8WZ42-12 [13624-13631]; D3DPF9 [4559-4566]; Q8WZ42-8 [12108-12115]; A0A0A0MTS7 [13624-13631]; Q8WZ42-13 [12117-12124]; Q8WZ42-4 [11078-11085]	10	Medium	[K].KAEAKAPK.[E]	1xGG [K5]; 1xTMT6plex [K8]; 1xTMT6plex [N-Term]	0.127822	0.0101612	6	16	1	Q8WZ42-10; Q8WZ42-9; Q8WZ42-7; D3DPG0; Q8WZ42-12; Q8WZ42-4	Titin	TTN	2	1414.88	1	0.641	0.862	0.643	2.775	3.204	3.352	4.088	4.568	4.46										39.1	25.1	33.7	25.1	108.4	125.2	131	159.7	178.5	174.3		39.1
FALSE	FALSE		C9JM50 [91-119]	6	Medium	[R].LASYLDKVRALEAANGELEILGATIENSR.[I]	1xDeamidated [N15]; 1xGG [K7]; 1xTMT6plex [N-Term]	0.128554	0.0102297	1	1	2	C9JM50	Keratin, type I cytoskeletal 19 (Fragment)	KRT19	2	3460.85	0	0.928	1.047	1.011	1.64	1.366	1.517	3.471	2.965	3.342										54.7	50.7	57.3	55.3	89.7	74.7	83	189.8	162.1	182.7		54.7
FALSE	FALSE		Q9BYX7 [257-284]	5	Medium	[R].CPEALFQPCFLGMESCGIHKTTFNSIVK.[S]	3xCarbamidomethyl [C1; C9; C16]; 1xOxidation [M13]; 2xGG [K20; K28]; 1xTMT6plex [N-Term]	0.132274	0.0104179	1	1	7	Q9BYX7	Putative beta-actin-like protein 3 (Kappa-actin) (POTE ankyrin domain family member K)	POTEKP ACTBL3 FKSG30	1	3744.78	0	1.108	0.982	1.025	0.62	0.583	0.577	0.788	0.757	1.09	0.291534	0.688125	0.576346	0.105406	0.0440268	0.155782	0.371596	0.32313	0.564322	117.2	129.1	114.4	119.4	72.2	72.4	67.2	92.4	88.1	127.7	140.8	114.3	115.1
FALSE	FALSE		Q14489 [24-47]		Medium	[R].SAVPPGADKKAEAGLGQQPEFQFR.[G]	1xDeamidated [Q]; 1xGG [K]; 1xTMT6plex [K]; 1xTMT6plex [N-Term]	0.134554	0.010604	1	1	8	Q14489	Ribosomal protein S10 (Fragment)		2	3101.64	0	1.369	1.778	1.436	1.475	1.794	1.811	1.548	1.759	1.815										63.4	86.7	112.6	91	93.4	113.6	114.7	98.1	111.4	115	63.4
FALSE	FALSE		P16402 [112-120]	31	Medium	[K].AASGEGKPK.[A]	1xGG [K7]; 1xTMT6plex [K9]; 1xTMT6plex [N-Term]	0.140817	0.0110926	1	1	3	P16402	Histone H1.3 (Histone H1c) (Histone H1s-2)	HIST1H1D H1F3	0	1416.82	3	0.594	0.72	0.729	2.266	2.738	4.205	2.476	3.812	2.889	0.107814	0.107976	0.382067	0.0292831	0.024289	0.0235661	0.0324267	0.0260426	0.0236793	47.5	26.9	33.2	35	108.7	126.4	201.7	113.5	180.9	126.3	48.2	47.7	41.2
FALSE	FALSE		Q9BTI9 [141-157]; A4ZU86 [207-223]; Q9NX34 [127-143]; V9HVU7 [131-147]; P06748-3 A0A140VJQ2 [207-223]; P06748 A0A0S2Z491 [207-223]; A0A024RAP1 [131-147]	4	Medium	[K].SNQNGKDSKPSSTPRSK.[G]	1xDeamidated [N4]; 1xGG [K9]; 1xTMT6plex [N-Term]	0.147344	0.011592	4	7	35	Q9BTI9; Q9NX34; V9HVU7; A0A024RAP1	NPM1 protein (Fragment)	NPM1	2	2162.1	0	1.194	0.97	1.018	2.403	2.686	4.672	14.52	23.426	16.054	0.717165	0.574574	0.608741	0.304609	0.253625	0.0941222	0.0511318	0.0403279	0.0283653	14.9	14.1	12.4	12.7	34.5	39.9	69.4	215.7	348	238.5	14.7	29.9	11.7
FALSE	FALSE		B4DUI5 [34-64]; P60174-1 V9HWK1 [70-100]; P60174 [107-137]	13	Medium	[K].VTNGAFTGEISPGMIKDCGATWVVLGHSERR.[H]	1xCarbamidomethyl [C18]; 1xDeamidated [N3]; 1xOxidation [M14]; 1xGG [K16]; 1xTMT6plex [N-Term]	0.147344	0.011592	2	3	2	B4DUI5; P60174	Triosephosphate isomerase (EC 5.3.1.1)		2	3705.83	0	1.082	1.238	1.284	1.344	1.251	1.547	0.992	1.216	0.94										84.1	91	104.1	107.9	113	105.2	130	83.4	102.2	79			84.1
FALSE	FALSE	A0A0J9YX86 2xDeamidated [R129; ]; F8WBI6 2xDeamidated [R129; ]; H3BSI0 2xDeamidated [R116; ]; A0A1B0GU40 2xDeamidated [R137; ]; H3BMP0 2xDeamidated [R129; ]; A6NCC3 2xDeamidated [R129; ]; H3BV12 2xDeamidated [R129; ]; A0A1B0GV12 2xDeamidated [R129; ]	A0A0J9YX86 [125-142]; F8WBI6 [125-142]; H3BSI0 [112-129]; A0A1B0GU40 [133-150]; H3BMP0 [125-142]; A6NCC3 [125-142]; H3BV12 [125-142]; A0A1B0GV12 [125-142]		Medium	[R].QKAERELEVQIQTLIIQK.[E]	2xDeamidated [R5; Q17]; 1xLRGG [K2]; 1xTMT6plex [K18]; 1xTMT6plex [N-Term]	0.151559	0.0119101	1	8	5	A0A1B0GU40	Golgin subfamily A member 8N	GOLGA8N	2	3010.77	4	1.25	1.502	1.471	0.53	0.447	0.393	0.354	0.337	0.326	0.121939	0.121309	0.133622	0.0290524	0.0265811	0.0648415	0.0793285	0.0529856	0.0356668	133.7	167	195	191.1	68.8	59.8	51	47.3	43.8	42.4	128.1	135.3	131.9
FALSE	FALSE		B4DYC5 [63-79]; Q8N1G1 [791-807]; A0A087WY50 [10-26]; B4DWY3 [100-116]	11	Medium	[R].IAHSPSLQSLKKPIIPK.[E]	1xDeamidated [Q8]; 2xGG [K11; K12]; 1xTMT6plex [K17]; 1xTMT6plex [N-Term]	0.160304	0.0126243	1	4	27	Q8N1G1	RNA exonuclease 1 homolog (EC 3.1.-.-) (Elongin-A-binding protein 1) (EloA-BP1) (Transcription elongation factor B polypeptide 3-binding protein 1)	REXO1 ELOABP1 KIAA1138 TCEB3BP1	1	2544.53	9	1.003	0.955	1.009	0.255	0.251	0.176	0.247	0.225	0.242	0.962992	0.208005	0.948713	0.0270395	0.0353758	0.0276899	0.0661383	0.062299	0.0587333	186.2	184.1	177.8	189.9	51.2	46.8	32.8	46	41.8	43.4	209.1	186.4	179.2
FALSE	TRUE		B3KTK4 [416-432]; H0Y8U1 [94-110]; Q8IWV2-4 [88-104]; Q8IWV2-3 [88-104]; B3KUN6 [197-213]; Q8IWV2 A0A024R2E5 [416-432]; B3KQ34 [88-104]	9	Medium	[R].VTLVKVGGEVVIECKPK.[A]	1xCarbamidomethyl [C14]; 1xGG [K15]; 1xTMT6plex [K17]; 1xTMT6plex [N-Term]	0.162103	0.0127668	4	7	57	H0Y8U1; B3KUN6; Q8IWV2 A0A024R2E5; B3KQ34	Contactin-4 (Fragment)	CNTN4	1	2427.44	4	0.544	0.501	0.433	2.512	2.073	2.396	1.104	1.388	1.239	0.155231	0.128393	0.17743	0.0289178	0.0279598	0.0312604	0.389935	0.0441123	0.0283444	74.3	44.3	39.3	34.5	186.6	162.5	178	82	109.5	89.1	73.6	80.6	68.7
FALSE	FALSE		P78348-1 [134-155]; P78348 [134-155]; F8VSK4 [134-155]; A8K1U5 [134-155]	22	Medium	[K].QLEILQDKANFRSFKPKPFNMR.[E]	1xDeamidated [Q6]; 1xGG [K8]; 2xTMT6plex [K15; K17]; 1xTMT6plex [N-Term]	0.162103	0.0127668	1	4	11	F8VSK4	Acid-sensing ion channel 1	ASIC1	2	3509.97	2	1.208	1.484	1.42	0.776	0.28	0.299	0.114	0.166	0.126										145.5	175.7	216	206.7	112.9	40.8	43.4	16.6	24.1	18.3	145.5
FALSE	FALSE		Q8TBR3 [442-473]; P35637-2 [441-472]; Q13344 [445-476]; P35637 Q6IBQ5 [442-473]; B4DR70 [371-402]; Q59H57 [216-247]; A8K4H1 [441-472]; H3BPE7 [443-474]	1	Medium	[R].NECNQCKAPKPDGPGGGPGGSHMGGNYGDDRR.[G]	2xCarbamidomethyl [C3; C6]; 1xOxidation [M23]; 1xGG [K]; 1xTMT6plex [N-Term]	0.172299	0.0136433	1	8	3	Q13344	Fus-like protein (Fragment)		2	3701.62	0	0.857	0.989	0.82	2.203	2.176	2.472	3.151	3.808	4.228										46.1	39.5	45.6	37.8	101.5	100.3	113.9	145.2	175.4	194.8		46.1
FALSE	FALSE		Q9Y6A5 [789-806]	12	Medium	[K].AQAEALALQASLRKEQMR.[I]	1xDeamidated [Q2]; 1xOxidation [M17]; 1xGG [K14]; 1xTMT6plex [N-Term]	0.177106	0.0139757	1	1	9	Q9Y6A5	Transforming acidic coiled-coil-containing protein 3 (ERIC-1)	TACC3 ERIC1	2	2374.27	1	1.121	1.205	1.284	0.498	0.238	0.282	0.232	0.057	0.337										159.9	179.2	192.7	205.3	79.6	38.1	45	37.1	9.1	53.9			159.9
FALSE	FALSE		Q16219 [691-709]	4	Medium	[R].LINTDSTAAENKPMTDMKK.[R]	2xDeamidated [N3; N11]; 1xGG [K]; 2xTMT6plex [K19; K]; 1xTMT6plex [N-Term]	0.1891	0.0148925	1	1	2	Q16219	Insulin activator factor (Fragment)		1	2911.54	1	0.786	0.848	1.088	0.261	0.179	0.278	0.188	0.128	0.296										198	155.6	167.9	215.3	51.7	35.4	55.1	37.2	25.3	58.7			198
FALSE	FALSE		K7EP44 [92-124]; Q8TAP6-3 [39-71]; Q8TAP6 [217-249]; Q8TAP6-2 [142-174]	4	Medium	[R].SVLGSENGVTSLTVELMGVGTESKVSVGILNIK.[L]	1xDeamidated [N31]; 1xOxidation [M17]; 1xGG [K24]; 1xTMT6plex [K33]; 1xTMT6plex [N-Term]	0.195348	0.0155283	1	4	3	Q8TAP6	Centrosomal protein of 76 kDa (Cep76)	CEP76 C18orf9	1	3907.13	2	1.001	1.011	0.78	2.555	2.408	2.427	2.254	2.815	2.141										54.4	54.4	54.9	42.4	138.9	130.9	132	122.5	153	116.4	50.2	58.4
FALSE	FALSE	P62195-2 1xDeamidated [R364]; P62195 A0A140VJS3 1xDeamidated [R372]	P62195-2 [338-364]; P62195 A0A140VJS3 [346-372]		Medium	[R].KIAELMPGASGAEVKGVCTEAGMYALR.[E]	1xCarbamidomethyl [C18]; 1xDeamidated [R27]; 1xLRGG [K15]; 1xTMT6plex [K1]; 1xTMT6plex [N-Term]	0.195348	0.0155283	1	2	3	P62195 A0A140VJS3	26S proteasome regulatory subunit 8 (26S proteasome AAA-ATPase subunit RPT6) (Proteasome 26S subunit ATPase 5) (Proteasome subunit p45) (Thyroid hormone receptor-interacting protein 1) (TRIP1) (p45/SUG)	PSMC5 SUG1	2	3651.94	0	1.274	1.352	1.302	0.492	0.374	0.384	0.358	0.319	0.345										138.9	176.9	187.7	180.9	68.3	52	53.3	49.8	44.3	48		139.1	137.9
FALSE	FALSE		A8K4T7 [276-284]; P78559-2 [276-284]; E9PGC8 [514-522]; Q7Z5F9 [276-284]; Q504X9 [276-284]; P78559 [276-284]	20	Medium	[K].ILEGLEKLR.[H]	1xGG [K7]; 1xTMT6plex [N-Term]	0.206151	0.0163329	3	6	8	A8K4T7; E9PGC8; Q7Z5F9	cDNA FLJ77111, highly similar to Homo sapiens microtubule-associated protein 1A (MAP1A), mRNA (Fragment)		1	1413.86	0	1.2	1.275	1.461	0.923	1.096	0.922	1.078	1.167	1.605										85.3	102.3	108.7	124.6	78.7	93.5	78.6	91.9	99.5	136.9		88.8	81.6
FALSE	FALSE		Q2QD09 [220-249]	8	Medium	[K].ELASQPGVDGFLVGGASLKPEFVDIINAKQ.[-]	1xDeamidated [Q/N]; 1xGG [K19]; 1xTMT6plex [K29]; 1xTMT6plex [N-Term]	0.209489	0.0165904	1	1	17	Q2QD09	Triosephosphate isomerase (EC 5.3.1.1) (Fragment)		1	3672.99	0	1.286	1.277	1.127	0.492	0.325	0.251	0.276	0.387	0.245										150	192.9	191.6	169	73.8	48.8	37.7	41.4	58.1	36.7		150
FALSE	FALSE		Q9NXD2 X5D963 [606-632]; B4E157 [20-46]		Medium	[R].NSLILKPKPDPAQQTDSQNSDTEQYFR.[E]	1xGG [K8]; 1xLRGG [K6]; 1xTMT6plex [N-Term]	0.226886	0.0181263	1	2	2	B4E157	cDNA FLJ52466		0	3846.96	1	1.161	1.252	1.366	0.381	0.299	0.3	0.161	0.147	0.096										162.3	188.5	203.1	221.6	61.8	48.5	48.8	26.1	23.8	15.6	156.4		164
FALSE	FALSE		O43151-2 [1072-1095]; J3KNF3 [1114-1137]; O43151 [1072-1095]; K9JJH7 [1207-1230]		Medium	[K].GGLSQQGLKPSLKVEPQNHFSSFK.[Y]	1xDeamidated [Q/N]; 1xGG [K13]; 1xTMT6plex [K24]; 1xTMT6plex [N-Term]	0.230511	0.0183101	1	4	2	K9JJH7	Methylcytosine dioxygenase TET3	TET3	1	3186.73	0	1.348	1.168	1.058	0.52	0.532	0.426	0.41	0.339	0.427										138.4	186.5	161.6	146.4	71.9	73.6	58.9	56.7	46.9	59.1	138.4
FALSE	FALSE	Q6P2Q9 1xDeamidated [R86]	Q6P2Q9 [86-101]		Medium	[K].RVYLGALKYMPHAVLK.[L]	1xDeamidated [R1]; 1xLRGG [K8]; 1xTMT6plex [K16]; 1xTMT6plex [N-Term]	0.231731	0.0183897	1	1	2	Q6P2Q9	Pre-mRNA-processing-splicing factor 8 (220 kDa U5 snRNP-specific protein) (PRP8 homolog) (Splicing factor Prp8) (p220)	PRPF8 PRPC8	2	2701.61	1	1.017	1.019	0.848	1.573	1.626	1.909	1.114	1.17	1.093										80.9	82.2	82.4	68.6	127.2	131.4	154.3	90.1	94.6	88.3		83.6	78.1
FALSE	FALSE		O76074-2 [473-513]; O76074 [515-555]; I6NLS4 [515-555]; G5E9C5 [463-503]	2	Medium	[R].AMAKQMVTLEVLSYHASAAEEETRELQSLAAAVVPSAQTLK.[I]	2xDeamidated [Q27; Q38]; 2xOxidation [M2; M6]; 1xGG [K4]; 1xTMT6plex [K41]; 1xTMT6plex [N-Term]	0.242964	0.0192154	1	4	5	O76074	cGMP-specific 3',5'-cyclic phosphodiesterase (EC 3.1.4.35) (cGMP-binding cGMP-specific phosphodiesterase) (CGB-PDE)	PDE5A PDE5	2	4978.58	2	0.961	0.742	0.743	0.667	0.717	0.579	0.366	0.78	0.693										137.9	132.6	102.4	102.5	92	98.9	79.9	50.5	107.6	95.6	159.9		115.6
FALSE	FALSE		A4ZU86 [46-80]; P06748-2 A0A0S2Z4G7 [46-80]; P06748-3 A0A140VJQ2 [46-80]; P06748 A0A0S2Z491 [46-80]	5	Medium	[R].TVSLGAGAKDELHIVEAEAMNYEGSPIKVTLATLK.[M]	1xDeamidated [N21]; 1xGG [K9]; 2xTMT6plex [K28; K35]; 1xTMT6plex [N-Term]	0.244241	0.0193287	1	4	10	P06748-2 A0A0S2Z4G7	Nucleophosmin	NPM1	2	4458.44	0	1.141	1.107	1.366	1.193	0.911	1.13	1.954	2.693	1.829										69.8	79.7	77.3	95.3	83.3	63.6	78.9	136.4	188	127.7	64.9	74.1
FALSE	FALSE		H7BY16 [149-170]; Q9BQ02 [296-317]; B3KM80 [350-371]; P19338 A0A024R4A0 [524-545]; Q6ZS99 [417-438]; B3KTP9 [447-468]		Medium	[K].GYAFIEFASFEDAKEALNSCNK.[R]	1xCarbamidomethyl [C20]; 1xDeamidated [N18]; 1xLRGG [K14]; 1xTMT6plex [K22]; 1xTMT6plex [N-Term]	0.246813	0.0194625	4	6	2	H7BY16; Q9BQ02; B3KM80; Q6ZS99	Nucleolin (Fragment)	NCL	1	3353.69	0	1.127	1.756	1.464	1.833	1.937	1.799	2.405	2.538	2.47										54.6	61.5	95.8	79.9	100	105.7	98.1	131.2	138.5	134.8	54.6
FALSE	FALSE		Q3ZLR7 [732-743]		Medium	[K].LQLQPQWQPKPR.[Q]	2xDeamidated [Q6; Q8]; 1xLRGG [K10]; 1xTMT6plex [N-Term]	0.246813	0.0194625	1	1	2	Q3ZLR7	Transcription factor SPT20 homolog-like 1	SUPT20HL1 FAM48B1	0	2133.21	2	1.037	0.98	1.05	0.555	0.627	0.378	0.215	0.132	0.258										160.4	166.4	157.3	168.5	89	100.5	60.6	34.5	21.2	41.5		142.6	178
FALSE	FALSE		B0QYP8 [126-144]; Q9HBI1 [128-146]; Q9HBI1-3 [91-109]; Q9HBI1-2 [161-179]; A0A087WZB5 [76-94]	7	Medium	[K].LAGCKLNVAEVTQSEIGQK.[Q]	1xCarbamidomethyl [C4]; 2xDeamidated [Q13; Q18]; 1xGG [K5]; 1xTMT6plex [K19]; 1xTMT6plex [N-Term]	0.246813	0.0194625	1	5	7	Q9HBI1	Beta-parvin (Affixin)	PARVB CGI-56	1	2619.41	1	1.167	0.997	1.133	0.388	0.451	0.311	0.166	0.3	0.201	0.425547	0.669211	0.119224	0.0475647	0.0903945	0.0228482	0.0369706	0.117928	0.0677045	162.7	183.3	178.9	180.8	63.2	70.9	52	26.7	48.7	32.7	180.7	160.1	154.6
FALSE	FALSE		B2RCP1 [140-165]; E9PCN2 [162-187]; B7Z9H9 [72-97]; B7Z685 [72-97]; Q02153 [140-165]; Q02153-2 [140-165]; D6RC99 [72-97]; Q02153-3 [120-145]	5	Medium	[R].EGLQDIVIGIIKTVAQQIHGTEIDMK.[V]	1xDeamidated [Q4]; 1xGG [K12]; 1xTMT6plex [K26]; 1xTMT6plex [N-Term]	0.24941	0.019609	2	8	10	Q02153-2; D6RC99	Guanylate cyclase soluble subunit beta-1	GUCY1B1	1	3422.9	5	1.157	0.78	0.919	0.272	0.272	0.192	0.209	0.167	0.182	0.156645	0.104425	0.491975	0.037843	0.0236171	0.0287637	0.0342939	0.0222041	0.0278627	194.7	225.2	151.8	177.7	52.9	52.9	37.4	40.6	31.3	35.4	194.2	187.5	196.1
FALSE	FALSE		D3DS91 [2035-2056]; B2RP22 [2277-2298]; Q13023 [2277-2298]	0	Medium	[K].VQDLSLKANQPTDKAALHPSPK.[T]	1xDeamidated [Q/N]; 1xGG [K]; 1xTMT6plex [K22]; 1xTMT6plex [N-Term]	0.24941	0.019609	1	3	6	B2RP22	A kinase (PRKA) anchor protein 6	AKAP6	2	2931.63	1	1.104	1.397	1.159	1.119	0.907	1.075	0.76	0.699	0.679										101	111.5	141.1	117.1	113.1	91.6	108.6	76.8	70.6	68.6			101
FALSE	TRUE		B3KT07 [306-327]; H0YBT4 [68-89]; Q14195-2 A0A140VK07 [483-504]; X5DQV1 [452-473]; B3KXQ5 [369-390]; B3KV96 [363-384]; Q14194-2 X5DNI1 [483-504]; Q96I11 [201-222]; Q6DEN2 [483-504]; Q14194 [369-390]; E9PD68 [367-388]; Q8IXW6 [369-390]; Q14195 [369-390]		Medium	[K].AVATGKMDENQFVAVTSTNAAK.[I]	1xDeamidated [N19]; 1xLRGG [K6]; 1xTMT6plex [N-Term]	0.253349	0.0199313	7	13	2	H0YBT4; B3KXQ5; Q14194-2 X5DNI1; Q96I11; Q6DEN2; E9PD68; Q8IXW6	Dihydropyrimidinase-related protein 3 (Fragment)	DPYSL3	1	2866.49	0	1.145	1.212	1.139	0.719	0.842	0.729	0.62	0.667	0.58										115.6	132.3	140.1	131.7	83.1	97.3	84.2	71.7	77.1	67		100.1	131.1
FALSE	FALSE		Q9NWB7 [289-303]; B4DQL5 [320-334]		Medium	[K].LHNEITRTLEKISSR.[E]	1xDeamidated [N3]; 1xLRGG [K11]; 1xTMT6plex [N-Term]	0.253349	0.0199313	1	2	3	Q9NWB7	Intraflagellar transport protein 57 homolog (Dermal papilla-derived protein 8) (Estrogen-related receptor beta-like protein 1) (HIP1-interacting protein) (MHS4R2)	IFT57 DERP8 ESRRBL1 HIPPI	2	2410.37	1	0.941	1.002	1.02	0.964	0.876	0.671	0.7	0.602	0.546										120.2	113	120.4	122.6	115.9	105.2	80.7	84.1	72.3	65.6		120.2
FALSE	FALSE		Q9Y4B5-3 [1336-1350]; Q9Y4B5-2 [1295-1309]; Q9Y4B5-4 [661-675]; Q9Y4B5 [1655-1669]		Medium	[R].GSGVTSSPHKCLTPK.[A]	1xCarbamidomethyl [C11]; 1xLRGG [K10]; 1xTMT6plex [K15]; 1xTMT6plex [N-Term]	0.262758	0.0207248	3	4	8	Q9Y4B5-3; Q9Y4B5-4; Q9Y4B5	Microtubule cross-linking factor 1	MTCL1	1	2397.34	3	0.745	0.812	0.771	1.57	1.558	1.511	0.635	0.765	0.614	0.125734	0.101137	0.152515	0.0226409	0.0500593	0.0214864	0.0495968	0.123574	0.0535432	99.5	72.9	80.8	79.1	157	153	150.4	66	79.4	61.8	97.1	104	99.7
FALSE	FALSE		A8K489 [180-198]; Q15007 [180-198]; Q6AHX7 [30-48]	3	Medium	[R].IAQLEAELALQKKYSEELK.[S]	3xGG [K12; K13; K19]; 1xTMT6plex [N-Term]	0.268273	0.0211599	2	3	5	A8K489; Q6AHX7	cDNA FLJ76151, highly similar to Homo sapiens Wilms tumor 1 associated protein (WTAP), transcript variant 1, mRNA		2	2775.51	2	1.011	0.934	1.232	1.087	0.676	0.691	0.337	0.257	0.27	0.682666	0.787553	0.811463	0.709088	0.449173	0.0502943	0.066823	0.0556789	0.0379722	129.7	152.2	128.8	145.4	137.6	87.7	98.6	43.7	41.4	35	174.6	126.8	115.4
FALSE	FALSE		Q6AI22 [2306-2312]; Q9NU22 [5092-5098]	21	Medium	[R].KNTQSFK.[R]	1xDeamidated [Q4]; 1xGG [K1]; 1xTMT6plex [K7]; 1xTMT6plex [N-Term]	0.269668	0.021298	2	2	16	Q6AI22; Q9NU22	Uncharacterized protein DKFZp686H16106 (Fragment)	DKFZp686H16106	1	1425.81	0	0.879	0.898	0.853	2.136	2.21	2.06	3.078	2.674	3.582	0.542061	0.234102	0.327602	0.0466084	0.0680531	0.0461097	0.0432084	0.0275226	0.0295804	53	44.2	44.2	39.5	107.3	117.2	109.2	163.4	141.7	180.3	41.6	54	54.1
FALSE	FALSE		Q9Y6Q9-3 [865-891]; Q9Y6Q9-5 [855-881]; Q0IIN7 [855-881]; Q9Y6Q9 [855-881]; A8K0W8 [855-881]; Q569F6 [855-881]; Q59EE8 [859-885]; B4DYT5 [650-676]; Q9Y6Q9-2 [855-881]	2	Medium	[R].AVSLDSPVSVGSSPPVKNISAFPMLPK.[Q]	1xGG [K17]; 1xTMT6plex [K27]; 1xTMT6plex [N-Term]	0.275313	0.0217466	2	9	2	Q59EE8; Q9Y6Q9-2	Nuclear receptor coactivator 3 isoform a variant (Fragment)		1	3296.83	1	0.857	0.81	0.814	1.288	1.347	1.369	1.217	1.056	0.532										97.2	83.3	78.7	79.1	125.2	130.9	133	118.2	102.7	51.7	97.2
FALSE	FALSE		Q92608 [867-883]; E5RFJ0 [867-883]; F6S220 [247-263]; H0YB76 [71-87]; Q92608-2 [248-264]; E7ERW7 [359-375]	5	Medium	[K].ELLEQKDDMQHQVLERK.[Y]	1xOxidation [M9]; 1xGG [K6]; 1xTMT6plex [K17]; 1xTMT6plex [N-Term]	0.276741	0.0218556	2	6	3	Q92608; E7ERW7	Dedicator of cytokinesis protein 2	DOCK2 KIAA0209	2	2727.45	1	1.256	1.515	1.416	0.55	0.67	0.458	0.387	0.363	0.374										125.2	157.2	189.7	177.3	68.8	83.8	57.3	48.5	45.4	46.9		121.4	128.7
FALSE	FALSE		C9JA44 [52-63]; B7ZM16 [193-204]; D2KTB4 [226-237]; D2KTB5 [207-218]; C9JQ07 [151-162]; A2PYH4 [193-204]; B3KU00 [193-204]		Medium	[K].IVQTEMNKGKSR.[N]	1xDeamidated [Q3]; 2xLRGG [K8; K10]; 1xTMT6plex [N-Term]	0.276741	0.0218556	2	7	5	D2KTB5; C9JQ07	Helicase (Fragment)		2	2387.35	1	0.905	0.842	1.055	3.309	2.287	3.946	7.655	6.077	7.172	0.468104	0.550949	0.944793	0.856634	0.860811	0.887811	0.0253501	0.683793	0.874821	30.4	23.6	25.6	29.9	93.6	69.6	102.8	233	173.3	218.2	25.2	97.8	29.5
FALSE	FALSE		Q5QNW6 [2-12]; B4DR52 [2-12]; Q93079 [2-12]; Q5QNW6-2 [2-12]; P23527 [2-12]	10	Medium	[M].PDPAKSAPAPK.[K]	1xGG [K5]; 1xTMT6plex [K11]; 1xTMT6plex [N-Term]	0.279615	0.0221061	1	5	14	B4DR52	Histone H2B		1	1650.96	12	0.751	0.914	0.778	3.274	1.696	3.606	6.936	5.929	6.348	0.475353	0.631404	0.546083	0.233867	0.32524	0.136945	0.0948712	0.0723555	0.0468183	32.1	24.4	29.3	26.9	85.8	64.9	115.7	222.6	194.5	203.7	32	68.8	23.2
FALSE	FALSE		F6S232 [120-130]; Q8IYX7 [185-195]		Medium	[K].TISCKPLAMPK.[L]	1xCarbamidomethyl [C4]; 1xOxidation [M9]; 1xGG [K5]; 1xTMT6plex [K11]; 1xTMT6plex [N-Term]	0.279615	0.0221061	1	2	3	Q8IYX7	Stabilizer of axonemal microtubules 1	SAXO1 C9orf138 FAM154A	0	1834.03	0	1.607	0.633	0.944	4.912	6.584	6.693	9.056	8.301	7.113										21.3	34.3	13.5	20.1	104.9	140.6	142.9	193.3	177.2	151.8	10.8	41.5
FALSE	FALSE		Q99878 [120-128]	10	Medium	[K].KTESHHKTK.[-]	1xGG [K7]; 2xTMT6plex [K1; K9]; 1xTMT6plex [N-Term]	0.282514	0.0224348	1	1	3	Q99878	Histone H2A type 1-J (Histone H2A/e)	HIST1H2AJ H2AFE	2	1897.12	0	0.289	0.839	0.458	2.654	3.753	3.653	4.783	4.819	3.806										38.4	11.1	32.2	17.6	101.9	144	140.2	183.6	185	146.1			38.4
FALSE	FALSE		O75037-2 [1314-1332]; Q2UVF0 [1329-1347]; O75037-3 [1314-1332]; O75037-4 [1327-1345]; O75037 [1327-1345]	1	Medium	[K].DRSCKMWNLVTGQEIAALK.[G]	1xCarbamidomethyl [C4]; 2xDeamidated [N8; Q13]; 1xOxidation [M6]; 1xGG [K5]; 1xTMT6plex [K19]; 1xTMT6plex [N-Term]	0.291362	0.0231662	2	5	3	Q2UVF0; O75037	Kinesin-like protein KIF21B variant	KIF21B	2	2810.46	3	1.057	1.021	1.112	0.609	0.253	0.165	0.241	0.155	0.141	0.890768	0.467736	0.475253	0.109543	0.0749451	0.0504712	0.0622189	0.0473638	0.0239124	169.5	179.2	177.5	198.4	96.4	42.9	33.7	49.2	30.5	22.8	154.5	199.1	165.4
FALSE	FALSE		O00268 [942-957]; A0A0G2JRY5 [314-329]		Medium	[R].AQLKFFEQLDQIEKQR.[K]	2xDeamidated [Q8; Q11]; 1xGG [K4]; 1xTMT6plex [K14]; 1xTMT6plex [N-Term]	0.292859	0.0233509	1	2	3	O00268	Transcription initiation factor TFIID subunit 4 (RNA polymerase II TBP-associated factor subunit C) (TBP-associated factor 4) (Transcription initiation factor TFIID 130 kDa subunit) (TAF(II)130) (TAFII-130) (TAFII130) (Transcription initiation factor TFIID 135 kDa subunit) (TAF(II)135) (TAFII-135) (TAFII135)	TAF4 TAF2C TAF2C1 TAF4A TAFII130 TAFII135	2	2595.42	1	1.08	0.983	0.973	2.58	2.758	2.728	1.751	1.924	1.797	0.865449	0.557893	0.560711	0.0726881	0.0849323	0.0744045	0.109498	0.140585	0.161977	56.6	61.2	57.1	55.1	146.2	156.2	154.5	102.3	109	101.8	73.6	47	56.8
FALSE	FALSE		Q9HCI7-2 [326-336]; A8K942 [400-410]; Q9HCI7 [400-410]	19	Medium	[K].TVLLSTKSMKK.[S]	1xOxidation [M9]; 2xGG [K7; K10]; 1xTMT6plex [K11]; 1xTMT6plex [N-Term]	0.294362	0.0234606	2	3	14	A8K942; Q9HCI7	cDNA FLJ76454, highly similar to Homo sapiens ring finger protein 184 (RNF184), mRNA		2	1938.15	1	0.718	0.887	0.978	0.47	0.373	0.296	0.128	0.124	0.111	0.273738	0.50182	0.589009	0.0757716	0.0595456	0.0729531	0.0474029	0.0239852	0.0574351	192.4	144	176.6	196.6	90.4	73.6	56.9	24.5	23.9	21.2	182.8	192.8	184.6
FALSE	FALSE		Q9C0H6-2 [198-224]; B3KPK3 [198-224]; Q9C0H6 A5PKX1 [198-224]		Medium	[R].LVLSAVSDYFAAMFTNDVLEAKQEEVR.[M]	1xDeamidated [N16]; 1xLRGG [K22]; 1xTMT6plex [N-Term]	0.300433	0.023927	1	3	13	Q9C0H6-2	Kelch-like protein 4	KLHL4	1	3658.9	2	1.229	1.344	1.343	0.539	0.507	0.383	0.42	0.378	0.387	0.143676	0.097207	0.154852	0.0585587	0.050024	0.0698728	0.0739774	0.0516153	0.03041	133.5	167.9	179.4	165.1	73.6	69.3	51.2	56.1	51.6	52.3	138.1	134.8	119
FALSE	FALSE		B4E027 [382-401]; R4GNG3 [382-401]; B5BU58 [444-463]; Q14161-5 [444-463]; Q14161-7 [444-463]; B4E2E7 [444-463]; Q14161-9 [363-382]; Q14161 [444-463]; Q68DM7 [26-45]; Q14161-2 Q6FI58 [444-463]	25	Medium	[K].IQQLMKVNNNLSDELRIMQK.[K]	1xDeamidated [Q3]; 1xOxidation [M5]; 1xGG [K6]; 1xTMT6plex [K20]; 1xTMT6plex [N-Term]	0.317617	0.0255993	2	10	17	R4GNG3; Q14161-2 Q6FI58	ARF GTPase-activating protein GIT2 (Fragment)	GIT2	2	3004.63	0	1.268	0.909	0.986	0.943	0.536	0.425	0.455	0.498	0.432										134.2	170.2	122	132.2	126.5	71.9	57.1	61	66.9	58			134.2
FALSE	FALSE	F8WC01 3xDeamidated [R]	F8WC01 [395-419]		Medium	[K].IQELVSQGIEQVYAVRKQLSPSYFI.[-]	3xDeamidated [Q7; Q11; Q18]; 1xLRGG [K17]; 1xTMT6plex [N-Term]	0.319213	0.0257309	1	1	11	F8WC01	Calcium-responsive transcription factor	CARF	2	3510.9	6	1.196	1.52	1.454	0.79	0.606	0.413	0.107	0.095	0.099	0.190638	0.0975781	0.120367	0.156751	0.0855114	0.0555146	0.0788172	0.0710029	0.0572424	137	167.7	200.2	202.2	108.3	84.9	57.9	14.9	13.3	13.6	121.1	134.2	137.3
FALSE	FALSE		P22612 [167-193]; K7ERP6 [122-148]; B7Z708 [109-135]; Q15136 [150-176]; P17612-2 [159-185]; P17612 A0A024R7J0 [167-193]	1	Medium	[R].DLKPENLLIDQQGYIQVTDFGFAKRVK.[G]	2xDeamidated [Q12; Q]; 1xGG [K24]; 2xTMT6plex [K3; K27]; 1xTMT6plex [N-Term]	0.324035	0.0261158	3	6	8	P22612; B7Z708; P17612-2	cAMP-dependent protein kinase catalytic subunit gamma (PKA C-gamma) (EC 2.7.11.11)	PRKACG	2	3939.18	2	0.886	0.96	0.907	1.028	1.224	1.116	0.787	0.844	0.873										103.9	92	99.7	94.3	106.8	127.2	116	81.8	87.7	90.7		102.6	104.9
FALSE	FALSE		H0Y468 [1-28]	1	Medium	[-].XNNAAISSMQEELNKGMADIDIQDDKWR.[D]	4xDeamidated [Q10; N14; Q23; N]; 2xGG [K15; K26]; 1xTMT6plex [N-Term]	0.324035	0.0261158	1	1	10	H0Y468	Rho GTPase-activating protein 21 (Fragment)	ARHGAP21	2	3666.71	3	1.067	1.026	1.176	0.75	0.777	0.705	0.841	0.845	0.696										112.6	120.2	115.5	132.4	84.5	87.5	79.3	94.7	95.1	78.4	113.7		110.4
FALSE	FALSE		Q8NE71-2 Q2L6I2 [7-30]; Q8NE71 [7-30]; B4DNU2 [7-30]; A0A0G2JIC2 [7-30]; A0PJ72 [7-30]; Q5STZ8 [7-30]		Medium	[K].QQPPEPEWIGDGESTSPSDKVVKK.[G]	2xLRGG [K23; K24]; 1xTMT6plex [N-Term]	0.352231	0.0292177	2	6	2	Q8NE71-2 Q2L6I2; Q5STZ8	ATP-binding cassette sub-family F member 1	ABCF1	2	3633.92	0	0.896	0.997	0.894	1.84	1.774	1.876	2.292	2.468	2.023										62.3	55.8	62.1	55.7	114.6	110.5	116.8	142.7	153.7	126	62.3
FALSE	FALSE		A8K9F4 [165-194]; Q9P1Q0 [165-194]; Q9P1Q0-3 [48-77]; A8KA24 [153-182]; Q9P1Q0-4 [153-182]; Q9P1Q0-2 [165-194]		Medium	[K].IFMKPDFALDDSLTFNSVLPWSHFNTAGGK.[G]	1xDeamidated [N16]; 1xLRGG [K4]; 1xTMT6plex [K30]; 1xTMT6plex [N-Term]	0.357348	0.0297735	2	6	1	A8K9F4; A8KA24	cDNA FLJ77625, highly similar to Homo sapiens vacuolar protein sorting 54 (VPS54), transcript variant 1, mRNA		0	4198.18	0	1.624	1.317	1.436	1.099	0.582	0.415	0.55	0.646	1.376										99.6	161.7	131.1	143	109.4	57.9	41.3	54.8	64.3	137			99.6
FALSE	FALSE		B4DLX7 [58-82]; Q92698 [238-262]; A8K996 [238-262]		Medium	[R].IQPLAIDGGSKDEIDQKLEGFMNQR.[G]	1xDeamidated [Q/N]; 1xLRGG [K17]; 1xTMT6plex [K11]; 1xTMT6plex [N-Term]	0.365957	0.0306439	2	3	4	B4DLX7; A8K996	cDNA FLJ58371, highly similar to DNA repair and recombination proteinRAD54-like (EC 3.6.1.-)		2	3644.95	1	1.143	1.269	1.204	0.678	0.531	0.407	0.426	0.346	0.364										135.7	155.1	172.2	163.4	92.1	72.1	55.2	57.8	47	49.4	131.8	139.3
FALSE	FALSE		B4DMR2 [166-181]	5	Medium	[R].VYLMSEQVTVTKWQMR.[T]	2xOxidation [M4; M15]; 1xGG [K12]; 1xTMT6plex [N-Term]	0.365957	0.0306439	1	1	15	B4DMR2	cDNA FLJ50582, highly similar to Cyclin-dependent kinase-like 3 (EC 2.7.11.22)		1	2374.21	1	0.772	0.859	0.967	1.794	1.413	1.421	1.102	1.538	1.515										80.8	62.4	69.4	78.1	144.9	114.1	114.8	89	124.2	122.3		80.8
FALSE	FALSE		Q9BTI9 [137-155]; A4ZU86 [203-221]; Q9NX34 [123-141]; V9HVU7 [127-145]; P06748-3 A0A140VJQ2 [203-221]; P06748 A0A0S2Z491 [203-221]; A0A024RAP1 [127-145]	4	Medium	[K].NAQKSNQNGKDSKPSSTPR.[S]	1xDeamidated [N/Q]; 1xGG [K]; 1xTMT6plex [K]; 1xTMT6plex [N-Term]	0.367691	0.0307943	4	7	26	Q9BTI9; Q9NX34; V9HVU7; A0A024RAP1	NPM1 protein (Fragment)	NPM1	2	2617.37	0	0.976	0.952	0.842	1.294	1.201	0.962	1.285	1.226	1.297										90.6	88.5	86.3	76.3	117.2	108.8	87.2	116.5	111.1	117.6		90.6
FALSE	FALSE		Q96IW7 [93-121]; B3KQ76 [93-121]; C9JRY4 [93-121]; C9JDJ8 [93-121]; C9JNZ0 [93-121]	3	Medium	[K].EFITTYNMMKTNTAVRPYCFIEFDNFIQR.[T]	1xCarbamidomethyl [C19]; 2xDeamidated [N25; Q28]; 1xOxidation [M]; 1xGG [K10]; 1xTMT6plex [N-Term]	0.367691	0.0307943	1	5	18	Q96IW7	Vesicle-trafficking protein SEC22a (SEC22 vesicle-trafficking protein homolog A) (SEC22 vesicle-trafficking protein-like 2)	SEC22A SEC22L2	1	4010.9	2	1.014	1.254	1.288	2.809	2.371	3.074	2.039	2.215	1.906										52.7	53.4	66.1	67.9	148.1	125	162	107.5	116.7	100.5	47.6		57.9
FALSE	FALSE		Q15629 Q6FHL3 [298-321]; A8K032 [298-321]; Q15629-2 [267-290]; G3XAN4 [212-235]		Medium	[R].IAVLASICVTQAFMMWKFINFQLR.[R]	1xCarbamidomethyl [C8]; 1xDeamidated [Q11]; 2xOxidation [M14; M15]; 1xGG [K17]; 1xTMT6plex [N-Term]	0.376413	0.0317956	1	4	4	A8K032	Translocating chain-associated membrane protein		1	3263.7	2	1.124	0.258	1.144	0.217	0.328	1.364	0.916	1.014	0.978										119.9	134.7	30.9	137.1	26	39.3	163.6	109.7	121.6	117.2	79.1	148.5
FALSE	FALSE		H7C002 [389-408]; A5D8W1-2 [506-525]; A5D8W1-5 [488-507]; H7BZV2 [89-108]; A5D8W1 [506-525]		Medium	[K].GTIQQMIGIFKNIISKPNEK.[E]	1xDeamidated [Q5]; 2xGG [K11; K16]; 1xTMT6plex [K20]; 1xTMT6plex [N-Term]	0.378167	0.0319884	2	5	5	H7C002; A5D8W1-5	Cilia- and flagella-associated protein 69 (Fragment)	CFAP69	1	2946.65	0	0.815	0.874	0.85	1.855	1.467	1.578	1.226	1.113	1.019	0.305506	0.332505	0.189463	0.0340005	0.0400151	0.0348821	0.873843	0.0602363	0.922187	85.6	67.5	70.9	69	150.5	134.1	135	104.9	95.2	87.2	92	81.6	86
FALSE	FALSE		P18428 [398-406]; Q8TCF0 [398-406]		Medium	[K].ITGFLKPGK.[V]	1xLRGG [K6]; 1xTMT6plex [K9]; 1xTMT6plex [N-Term]	0.381686	0.0323351	1	2	3	P18428	Lipopolysaccharide-binding protein (LBP)	LBP	0	1802.14	0	1.37	1.156	1.206	0.736	0.835	0.75	0.696	0.763	0.477										111.2	152.4	128.6	134.2	81.9	92.9	83.4	77.4	84.9	53			111.2
FALSE	FALSE		Q92878 [852-871]; Q92878-2 [858-877]; Q92878-3 [713-732]		Medium	[K].LIQDQQEQIQHLKSTTNELK.[S]	2xDeamidated [Q3; Q5]; 1xGG [K13]; 1xTMT6plex [K20]; 1xTMT6plex [N-Term]	0.381686	0.0323351	1	3	1	Q92878-2	DNA repair protein RAD50	RAD50	1	2968.6	0	1.105	1.28	1.076	1.056	0.826	0.981	1.07	0.847	0.899										98.6	109	126.3	106.2	104.1	81.5	96.8	105.5	83.5	88.6		98.6
FALSE	FALSE		P46939 [1031-1041]; A8K8Z1 [1030-1040]; P46939-2 [1036-1046]	19	Medium	[K].WMDGVKDFLMK.[Q]	1xOxidation [M10]; 1xGG [K6]; 1xTMT6plex [K11]; 1xTMT6plex [N-Term]	0.38345	0.0325503	1	3	48	P46939	Utrophin (Dystrophin-related protein 1) (DRP-1)	UTRN DMDL DRP1	1	1958.03	4	1.103	1.067	1.17	1.54	1.513	1.649	2.45	2.176	2.2	0.123804	0.344506	0.185303	0.0322719	0.0386557	0.0281249	0.0311602	0.0296475	0.0350371	62.2	68.6	70.2	77.5	99	94	105.2	151.3	135.2	136.7	60	67.8	62.1
FALSE	FALSE		Q96N91 [173-203]; Q9HBG4 A0A024R791 [338-368]		Medium	[R].ALEQGMELSGSSMAPIMTTVQSKTAPPTFNR.[T]	2xOxidation [M13; M17]; 1xLRGG [K23]; 1xTMT6plex [N-Term]	0.38345	0.0325503	1	2	1	Q9HBG4 A0A024R791	V-type proton ATPase 116 kDa subunit a isoform 4 (V-ATPase 116 kDa isoform a4) (Vacuolar proton translocating ATPase 116 kDa subunit a isoform 4) (Vacuolar proton translocating ATPase 116 kDa subunit a kidney isoform)	ATP6V0A4 ATP6N1B ATP6N2	1	3924.98	0	1.952	1.354	2.869	0.398	0.515	0.178	0.221	0.17	0.158										113.4	221.4	153.5	325.4	45.2	58.5	20.2	25.1	19.3	18			113.4
FALSE	FALSE		J7HBD5 [14-39]; Q9BZM5 [131-156]; B4DSS7 [131-156]; J7HBC7 [14-39]; Q8IZX9 [103-128]	1	Medium	[K].AEGHSSGSWQFSFDGQIFLLFDSEKR.[M]	1xDeamidated [Q10]; 1xGG [K25]; 1xTMT6plex [N-Term]	0.38345	0.0325503	1	5	5	B4DSS7	cDNA FLJ56582, highly similar to NKG2D ligand 2		1	3319.59	0	1.075	1.005	1.119	0.701	0.627	0.377	0.293	0.482	0.397										141.3	151.9	142	158.1	99	88.7	53.3	41.5	68.2	56.1	145		137.2
FALSE	FALSE	P0DJG4 2xDeamidated [R]	P0DJG4 [192-217]		Medium	[K].QWGTPDRKLFWGNQDPIRPVSQGALK.[A]	2xDeamidated [Q14; Q22]; 1xGG [K8]; 1xTMT6plex [K26]; 1xTMT6plex [N-Term]	0.390536	0.0332949	1	1	3	P0DJG4	Testicular haploid expressed gene protein-like (Theg spermatid-like protein)	THEGL	2	3568.91	0	1.073	1.102	1.119	0.911	0.893	0.933	0.622	0.669	0.599	0.861796	0.353212	0.614584	0.298382	0.163182	0.506194	0.154999	0.160641	0.167054	109.3	117.9	128	122.3	104.6	103.1	108.4	67.9	73.1	65.3	108.3	108.4	146.4
FALSE	FALSE		Q2QD09 [220-248]	0	Medium	[K].ELASQPGVDGFLVGGASLKPEFVDIINAK.[Q]	2xDeamidated [Q5; N27]; 1xGG [K19]; 1xTMT6plex [K29]; 1xTMT6plex [N-Term]	0.390536	0.0332949	1	1	2	Q2QD09	Triosephosphate isomerase (EC 5.3.1.1) (Fragment)		0	3545.91	0	1.155	1.105	1.33	0.501	0.394	0.145	0.198	0.164	0.421										155.9	180.1	172.3	207.3	78.1	61.4	22.7	30.9	25.5	65.7			155.9
[truncated: 86 more columns]

## Sheet: per qValue<0.05
Checked	Contaminant	Modifications in Proteins	Positions in Proteins	Ions Score (by Search Engine): Mascot	Confidence	Annotated Sequence	Modifications	Qvality PEP	Qvality q-value	# Protein Groups	# Proteins	# PSMs	Master Protein Accessions	Protein Name	Gene Name	# Missed Cleavages	Theo. MH+ [Da]	# Razor Quan Results	Abundance Ratio: (127N) / (126)	Abundance Ratio: (127C) / (126)	Abundance Ratio: (128N) / (126)	Abundance Ratio: (128C) / (126)	Abundance Ratio: (129N) / (126)	Abundance Ratio: (129C) / (126)	Abundance Ratio: (130N) / (126)	Abundance Ratio: (130C) / (126)	Abundance Ratio: (131) / (126)	Abundance Ratio Adj. P-Value: (127N) / (126)	Abundance Ratio Adj. P-Value: (127C) / (126)	Abundance Ratio Adj. P-Value: (128N) / (126)	Abundance Ratio Adj. P-Value: (128C) / (126)	Abundance Ratio Adj. P-Value: (129N) / (126)	Abundance Ratio Adj. P-Value: (129C) / (126)	Abundance Ratio Adj. P-Value: (130N) / (126)	Abundance Ratio Adj. P-Value: (130C) / (126)	Abundance Ratio Adj. P-Value: (131) / (126)	Abundances (Grouped): 126	Abundances (Grouped): 127N	Abundances (Grouped): 127C	Abundances (Grouped): 128N	Abundances (Grouped): 128C	Abundances (Grouped): 129N	Abundances (Grouped): 129C	Abundances (Grouped): 130N	Abundances (Grouped): 130C	Abundances (Grouped): 131	Abundances (Scaled): F1: 126, Control, TR1	Abundances (Scaled): F2: 126, Control, TR2	Abundances (Scaled): F3: 126, Control, TR3
FALSE	FALSE		Q5XKL5 [303-314]; A0A1B0GUL6 [303-314]	2	Medium	[R].DYCNFFQKPVPR.[T]	1xCarbamidomethyl [C3]; 2xDeamidated [N4; Q7]; 1xGG [K8]; 1xTMT6plex [N-Term]	0.390536	0.0332949	1	2	2	A0A1B0GUL6	BTB/POZ domain-containing protein 8	BTBD8	0	1915.92	1	0.447	0.318	1.029	2.352	1.936	3.589	2.031	2.013	3.172										55.9	25	17.8	57.5	131.5	108.2	200.7	113.5	112.6	177.3			55.9
FALSE	FALSE		Q4J6C0 [286-307]; C9JIR6 [286-307]; O75688-4 [286-307]; O75688-5 [286-307]; B3KP90 [286-307]; A8K599 [286-307]; O75688 [286-307]; O75688-2 [286-307]		Medium	[R].DNMSIVLVCFSNAPKVSDEAVK.[K]	1xCarbamidomethyl [C9]; 1xDeamidated [N2]; 1xGG [K15]; 1xTMT6plex [K22]; 1xTMT6plex [N-Term]	0.394096	0.033671	1	8	1	Q4J6C0	PPM1B beta isoform variant 6 (Fragment)	PPM1B	1	2996.55	0	1.099	1.185	1.177	0.818	0.667	0.634	1.046	0.573	0.641										113.1	124.3	134.1	133.2	92.5	75.5	71.7	118.3	64.8	72.5			113.1
FALSE	FALSE		A8K979-3 [262-270]		Medium	[K].NNPSLFMKK.[S]	1xGG [K8]; 1xTMT6plex [K9]; 1xTMT6plex [N-Term]	0.401252	0.0344679	1	1	3	A8K979-3	ERI1 exoribonuclease 2	ERI2	1	1650.94	0	1.289	1.007	0.987	0.554	0.63	0.56	0.764	0.682	0.684										122.6	158	123.4	121	68	77.2	68.7	93.6	83.7	83.9		117.8	127.3
FALSE	FALSE	Q96HY7 1xDeamidated [R]	Q96HY7 [752-767]		Medium	[R].QMVRNFRKPLIVASPK.[M]	1xDeamidated [R/N]; 1xOxidation [M2]; 1xGG [K8]; 1xTMT6plex [K16]; 1xTMT6plex [N-Term]	0.401252	0.0344679	1	1	12	Q96HY7	Probable 2-oxoglutarate dehydrogenase E1 component DHKTD1, mitochondrial (EC 1.2.4.2) (Dehydrogenase E1 and transketolase domain-containing protein 1)	DHTKD1 KIAA1630	2	2473.45	0	0.97	0.934	0.912	1.149	1.368	1.335	2.787	2.671	1.648										67.7	65.7	63.2	61.7	77.7	92.6	90.4	188.7	180.8	111.6	74.3		61.4
FALSE	FALSE	Q65ZQ3 2xDeamidated [R]	Q65ZQ3 [201-216]	2	Medium	[K].ALAKQVMQPAGSQRGR.[G]	2xDeamidated [Q/R]; 1xOxidation [M7]; 1xGG [K4]; 1xTMT6plex [N-Term]	0.406653	0.0351038	1	1	27	Q65ZQ3	FBRNP	D10S102	2	2059.09	7	0.79	0.764	0.766	2.918	2.881	3.168	2.247	2.615	2.415	0.37501	0.186095	0.318772	0.053243	0.108475	0.140688	0.300084	0.0871475	0.088679	50.8	41.6	39.9	39.2	152.7	146.4	161	104.2	132.9	131.2	86.5	50.2	45.8
FALSE	FALSE		Q02952 [605-615]; Q5CZB5 [500-510]; Q02952-3 [500-510]; Q02952-2 [507-517]		Medium	[R].EGVTPWASFKK.[M]	1xGG [K10]; 1xTMT6plex [K11]; 1xTMT6plex [N-Term]	0.408459	0.035276	2	4	3	Q5CZB5; Q02952-3	Uncharacterized protein DKFZp686M0430	DKFZp686M0430	1	1822.03	2	0.607	0.482	0.471	0.885	0.878	2.587	1.541	1.041	1.412										91.7	55.7	44.2	43.2	81.1	80.5	237.2	141.3	95.5	129.5	88.9		94.1
FALSE	FALSE		Q92736-2 [969-998]; Q92736 [969-998]; H7BY35 [953-982]	4	Medium	[K].NYQLTSGYKPAPMDLSFIKLTPSQEAMVDK.[L]	3xDeamidated [N1; Q3; Q24]; 2xGG [K9; K]; 1xTMT6plex [K]; 1xTMT6plex [N-Term]	0.415719	0.0361388	1	3	4	Q92736-2	Ryanodine receptor 2	RYR2	1	4062.05	1	1.507	1.073	1.049	0.202	0.18	0.084	0.181	0.23	0.087										178.8	269.4	191.9	187.5	36.2	32.2	15	32.3	41.2	15.5			178.8
FALSE	FALSE	E9PLZ3 1xDeamidated [R167]; E9PMJ3 1xDeamidated [R167]; P13489 A0A140VJT8 1xDeamidated [R167]; A0A024RC87 1xDeamidated [R162]; E9PIM9 1xDeamidated [R167]	E9PLZ3 [147-173]; E9PMJ3 [147-173]; P13489 A0A140VJT8 [147-173]; A0A024RC87 [142-168]; E9PIM9 [147-173]		Medium	[K].LQLEYCSLSAASCEPLASVLRAKPDFK.[E]	2xCarbamidomethyl [C6; C13]; 1xDeamidated [R21]; 1xLRGG [K23]; 1xTMT6plex [K27]; 1xTMT6plex [N-Term]	0.415719	0.0361388	1	5	1	A0A024RC87	Ribonuclease/angiogenin inhibitor 1, isoform CRA_a	RNH1 hCG_18617	1	3896.08	0	1.091	1.245	1.23	0.375	0.388	0.343	0.408	0.332	0.299										149	162.6	185.5	183.3	55.8	57.9	51.1	60.8	49.4	44.5			149
FALSE	FALSE		Q53FP0 [187-204]; Q9NVS9-4 [144-161]; Q9NVS9-2 [92-109]; Q9NVS9-3 [169-186]; Q9NVS9 V9HW45 [187-204]		Medium	[K].KNEELEQLYQDQEVPKPK.[S]	1xDeamidated [Q/N]; 1xGG [K1]; 2xTMT6plex [K16; K18]; 1xTMT6plex [N-Term]	0.417542	0.0362727	1	5	13	Q53FP0	Pyridoxine 5'-phosphate oxidase variant (Fragment)		1	3017.64	4	1.246	0.815	0.954	0.344	0.338	0.237	0.181	0.187	0.16	0.130758	0.152624	0.190771	0.0321114	0.0307781	0.0442292	0.0363922	0.0381222	0.0389222	182.1	232.5	152.4	169.5	62.7	61.5	43.2	32.9	34	29.2	192.7	172.5	180.6
FALSE	FALSE		H0YJK2 [18-34]		Medium	[K].VKAQLYAQAYDCTDSIK.[S]	1xCarbamidomethyl [C12]; 1xDeamidated [Q4]; 1xGG [K2]; 1xTMT6plex [K17]; 1xTMT6plex [N-Term]	0.421199	0.0366815	1	1	2	H0YJK2	Transmembrane protein 260 (Fragment)	TMEM260	1	2547.32	1	1.351	1.11	1.102	0.307	0.242	0.147	0.088	0.099	0.087										180.7	244.2	200.7	199.2	55.5	43.8	26.5	15.9	17.8	15.7	182.6		177.4
FALSE	FALSE		Q8N715 [163-178]		Medium	[R].VEKAQGGDQWAVPLGR.[H]	1xDeamidated [Q9]; 1xLRGG [K3]; 1xTMT6plex [N-Term]	0.424871	0.0371065	1	1	3	Q8N715	Coiled-coil domain-containing protein 185	CCDC185 C1orf65	1	2324.27	0	1.073	1.205	1.165	1.612	1.702	1.636	1.538	1.779	1.959										68.2	73.2	82.2	79.4	109.9	116	111.5	104.9	121.3	133.5	58.3	79.2
FALSE	FALSE		Q6ZU69 [457-482]; B4DXF4 [457-482]	4	Medium	[K].IENVPKPPLKDPFLFNELSFPQLLPK.[T]	1xDeamidated [N/Q]; 1xGG [K]; 2xTMT6plex [K26; K]; 1xTMT6plex [N-Term]	0.424871	0.0371065	1	2	22	Q6ZU69	Protein FAM205A	FAM205A C9orf144B	1	3823.2	4	0.299	0.42	0.366	2.173	1.9	1.802	0.619	0.875	0.469										100.8	30.2	42.3	36.9	219	191.5	181.6	62.4	88.2	47.2	103.1		98.2
FALSE	FALSE		H0YN88 [82-107]; A0A075B716 [82-107]; P08708 [82-107]		Medium	[R].DNYVPEVSALDQEIIEVDPDTKEMLK.[L]	1xOxidation [M24]; 1xGG [K]; 1xLRGG [K]; 1xTMT6plex [N-Term]	0.428558	0.0375305	1	3	4	P08708	40S ribosomal protein S17 (Small ribosomal subunit protein eS17)	RPS17 RPS17L	1	3732.88	1	1.145	1.122	1.344	0.527	0.291	0.339	0.246	0.266	0.33										151.3	173.2	169.8	203.3	79.7	44.1	51.3	37.3	40.3	49.9	151.3
FALSE	FALSE		M0R165 [34-55]; Q9UBC2 [34-55]; A8K5P4 [34-55]; Q9UBC2-2 [34-55]; Q9UBC2-3 A0A024R7G6 [34-55]; A5PKY0 [33-54]; K7EJR2 [34-55]; Q9UBC2-4 [34-55]; M0R330 [34-55]; M0QX30 [34-55]; M0R1V5 [34-55]		Medium	[R].VGASEAALFLKKSGLSDIILGK.[IK]	1xGG [K]; 1xTMT6plex [K22]; 1xTMT6plex [N-Term]	0.434116	0.0381132	2	11	6	Q9UBC2-2; M0R330	Epidermal growth factor receptor substrate 15-like 1	EPS15L1	2	2789.65	1	0.888	1.06	1.107	1.296	1.375	1.38	0.868	1.142	0.602	0.594345	0.587514	0.950289	0.263319	0.109887	0.0727234	0.482297	0.389794	0.263481	95.7	86.3	91.6	88.3	126	133.7	132	84.4	103.5	58.5	98.4	80.8	96.8
FALSE	FALSE		Q96SR6-3 [152-159]; K7EK67 [104-111]; Q96SR6-2 [152-159]; Q96SR6 [153-160]; C9JME7 [104-111]	0	Medium	[R].NISPIKEK.[F]	1xGG [K6]; 1xTMT6plex [K8]; 1xTMT6plex [N-Term]	0.434116	0.0381132	1	5	4	C9JME7	Zinc finger protein 382	ZNF382	1	1500.91	2	1.21	1.16	1.054	1.515	1.866	1.69	2.874	2.849	2.899	0.41461	0.104014	0.265592	0.666045	0.0563366	0.131721	0.03513	0.0253039	0.2456	57	59.9	64.9	61	86.3	97.8	96.3	152.8	158.9	165.1	7.8	56.6	55.7
FALSE	FALSE		Q9H0M5 [641-655]; K7EQV7 [623-637]; A0A087WVH9 [644-658]		Medium	[R].THTGEKPYECKECEK.[A]	2xCarbamidomethyl [C10; C13]; 1xGG [K11]; 1xLRGG [K6]; 1xTMT6plex [K15]; 1xTMT6plex [N-Term]	0.434116	0.0381132	1	3	1	Q9H0M5	Zinc finger protein 700	ZNF700	1	2851.42	0	0.579	0.887	0.694	1.487	1.613	1.365	1.04	1.316	1.317										88.5	51.2	78.5	61.4	131.6	142.8	120.9	92	116.5	116.5			88.5
FALSE	FALSE		E9PIQ6 [101-124]; Q14181 [141-164]	1	Medium	[R].SPHQLLSPSSFSPSATPSQKYNSR.[S]	1xDeamidated [Q/N]; 1xGG [K20]; 1xTMT6plex [N-Term]	0.434116	0.0381132	1	2	4	Q14181	DNA polymerase alpha subunit B (DNA polymerase alpha 70 kDa subunit)	POLA2	1	2947.47	0	1.036	1.144	1.103	1.078	1.008	0.928	1.172	0.992	0.894										96.6	100	110.5	106.5	104.1	97.4	89.6	113.2	95.8	86.4	96.6
FALSE	FALSE		Q5TCX8-2 [478-494]; Q5TCX8 [478-494]	17	Medium	[R].ELNILIFQLNQEKPKVK.[K]	2xDeamidated [N3; Q/N]; 1xGG [K]; 1xTMT6plex [K]; 1xTMT6plex [N-Term]	0.437841	0.0386397	1	2	10	Q5TCX8	Mitogen-activated protein kinase kinase kinase 21 (EC 2.7.11.25) (Mitogen-activated protein kinase kinase kinase MLK4) (Mixed lineage kinase 4)	MAP3K21 KIAA1804 MLK4	1	2628.54	0	1.031	0.729	0.831	0.278	0.282	0.266	0.163	0.28	0.237										196.1	202.1	143.1	163.1	54.6	55.4	52.2	32	54.8	46.5		201.1	190.7
FALSE	FALSE		A1L0S8 [864-876]; Q5TZA2-2 [304-316]; B1AKD8 [861-873]; Q5TZA2 [1001-1013]; A1L0S9 [864-876]		Medium	[R].EKEAAWRELEAER.[A]	1xGG [K2]; 1xTMT6plex [N-Term]	0.44534	0.0395019	1	5	1	Q5TZA2-2	Rootletin	CROCC	2	1960.01	0	0.922	1.108	1	1.709	2.014	1.97	1.552	1.939	1.804										66.6	61.4	73.8	66.6	113.8	134.1	131.2	103.3	129.1	120.1		66.6
FALSE	FALSE		B7Z7N3 [54-72]; P78386 [266-284]; F5GYI5 [54-72]	1	Medium	[R].VLQAHISDTSVIVKMDNSR.[D]	1xGG [K14]; 1xTMT6plex [N-Term]	0.451009	0.0402388	1	3	2	P78386	Keratin, type II cuticular Hb5 (Hair keratin K2.12) (Keratin-85) (K85) (Type II hair keratin Hb5) (Type-II keratin Kb25)	KRT85 KRTHB5	1	2456.31	0	1.047	1.004	0.948	2.588	2.594	2.796	3.109	3.331	3.277										46.1	48.2	46.3	43.7	119.3	119.6	128.9	143.3	153.5	151.1	46.1
FALSE	FALSE		F4MHE5 [240-259]	0	Medium	[K].ATVLQQLGWMHHNMDLVXDK.[A]	2xDeamidated [Q5; N/Q]; 1xOxidation [M]; 1xGG [K20]; 1xTMT6plex [N-Term]	0.451009	0.0402388	1	1	4	F4MHE5	Ubiquitously transcribed tetratricopeptide repeat protein Y-linked transcript variant 265	UTY	0	2694.32	1	1.34	1.321	1.26	0.686	0.749	0.683	0.631	0.736	0.623										110.8	148.4	146.3	139.6	76	82.9	75.7	69.9	81.5	68.9	110.8
FALSE	FALSE		Q8N7X4 [99-134]	4	Medium	[R].DASVPQESQGASPTGSPDAGVSGSKYDVAANGQDEK.[S]	1xDeamidated [Q]; 1xGG [K25]; 1xTMT6plex [K36]; 1xTMT6plex [N-Term]	0.452908	0.0404567	1	1	10	Q8N7X4	Melanoma-associated antigen B6 (Cancer/testis antigen 3.4) (CT3.4) (MAGE-B6 antigen)	MAGEB6	1	4079.93	1	1.202	1.009	1.017	1.044	0.369	0.592	0.186	0.658	0.274										136	163.5	137.3	138.3	142	50.2	80.5	25.3	89.5	37.3	136
FALSE	TRUE		P52948-2 [1026-1055]; P52948 [1043-1072]; P52948-6 [1043-1072]; P52948-5 [1026-1055]; A0A024RCC4 [1026-1055]; H7C3P6 [82-111]		Medium	[R].SLVGGLLQSKFTSGAFLSPSVSVQECRTPR.[A]	1xCarbamidomethyl [C26]; 1xDeamidated [Q8]; 1xLRGG [K10]; 1xTMT6plex [N-Term]	0.454811	0.0406267	2	6	3	P52948-2; A0A024RCC4	Nuclear pore complex protein Nup98-Nup96	NUP98	2	3822.05	0	0.871	1.056	0.925	1.894	1.808	2.115	1.485	2.137	1.435	0.266443	0.28465	0.88	0.0947436	0.0207431	0.0984687	0.111056	0.0427235	0.0871261	67.3	64.2	72	70.1	127.6	121.7	142.4	94.1	143.9	96.6	66.7	62.8	76.7
FALSE	FALSE		P78559-2 [1534-1542]; E9PGC8 [1772-1780]; P78559 [1534-1542]		Medium	[K].HQAQEQKDK.[V]	1xDeamidated [Q4]; 1xGG [K7]; 1xTMT6plex [K9]; 1xTMT6plex [N-Term]	0.456719	0.0408652	1	3	3	E9PGC8	Microtubule-associated protein 1A	MAP1A	1	1684.9	0	1.076	1.197	1.252	1.373	1.553	1.411	2.003	1.73	2.394	0.216332	0.129868	0.167863	0.0413102	0.0387944	0.0263199	0.052252	0.0712673	0.0343475	67.6	72.8	76.9	78.5	93.5	104.6	92.7	135.5	116.1	161.9	67.9	72	62.1
FALSE	FALSE	Q8N7X1 2xDeamidated [R67; ]; A8K8A6 2xDeamidated [R67; ]; O75526 2xDeamidated [R67; ]	Q8N7X1 [50-72]; A8K8A6 [50-72]; O75526 [50-72]		Medium	[R].GFAFVTFESPADAKAAARDMNGK.[YS]	2xDeamidated [R18; N21]; 1xGG [K14]; 1xTMT6plex [K23]; 1xTMT6plex [N-Term]	0.458631	0.0411527	2	3	3	Q8N7X1; A8K8A6	RNA-binding motif protein, X-linked-like-3	RBMXL3 CXorf55	2	2975.5	1	0.865	1.089	1.399	2.176	2.381	1.802	0.641	1.539	1.059	0.564972	0.412611	0.298718	0.0232474	0.0541558	0.166524	0.0645496	0.0421928	0.915216	74.1	63.4	78.1	83.7	155.5	172.4	140.6	42.9	106.6	82.7	76.4	80.4	58
FALSE	FALSE	P50548-2 2xDeamidated [R383; ]; B7Z6N1 2xDeamidated [R448; ]; P50548 A0A024R0L4 2xDeamidated [R458; ]	P50548-2 [381-408]; B7Z6N1 [446-473]; P50548 A0A024R0L4 [456-483]		Medium	[K].TPRAPPAPPKPEPGEAPGASQCMPLKLR.[F]	1xCarbamidomethyl [C22]; 2xDeamidated [R3; Q21]; 1xOxidation [M23]; 1xGG [K26]; 1xTMT6plex [N-Term]	0.458631	0.0411527	1	3	1	B7Z6N1	cDNA FLJ54385, highly similar to ETS domain-containing transcription factor ERF		2	3311.71	0	0.119	0.552	0.806	1.44	1.5	1.471	3.094	2.017	2.183										70.5	8.4	38.9	56.8	101.5	105.8	103.7	218.2	142.3	153.9		70.5
FALSE	FALSE		Q8NFC6 [2570-2598]; B4DNZ8 [377-405]		Medium	[K].CITGQESKIAPSHTMIPPATYSVALLAPK.[C]	1xCarbamidomethyl [C1]; 1xGG [K8]; 1xTMT6plex [K29]; 1xTMT6plex [N-Term]	0.458631	0.0411527	1	2	1	Q8NFC6	Biorientation of chromosomes in cell division protein 1-like 1	BOD1L1 BOD1L FAM44A KIAA1327	1	3653.98	1	1.476	1.417	1.318	1.079	0.778	0.971	1.064	1.106	1.003										89.2	131.6	126.4	117.5	96.3	69.4	86.6	94.9	98.6	89.4	89.2
FALSE	FALSE		B4DPF0 [189-200]	5	Medium	[K].LMKEGLEAAQLK.[A]	1xDeamidated [Q10]; 1xGG [K3]; 1xTMT6plex [K12]; 1xTMT6plex [N-Term]	0.458631	0.0411527	1	1	1	B4DPF0	cDNA FLJ54604, highly similar to Betaine--homocysteine S-methyltransferase (EC 2.1.1.5)		1	1904.09	1	1.356	1.458	1.646	0.212	0.576	0.203	0.18	0.149	0.222										142.8	193.7	208.2	235.1	30.3	82.3	29	25.7	21.2	31.8	142.8
FALSE	FALSE		B3KW36 [296-306]; O75161-2 [807-817]; O75161 [808-818]		Medium	[R].VKPIGVHSVVK.[G]	1xLRGG [K2]; 1xTMT6plex [K11]; 1xTMT6plex [N-Term]	0.478027	0.0434427	2	3	1	O75161-2; O75161	Nephrocystin-4	NPHP4	0	2004.28	0	0.815	0.707	0.64	1.201	1.304	1.362	1.257	1.672	0.82										92.8	75.6	65.6	59.4	111.5	121	126.3	116.6	155.1	76.1	92.8
FALSE	FALSE		Q9Y3B1-2 [80-91]; Q9Y3B1 [110-121]		Medium	[R].LIYKPHPQDPEK.[T]	1xGG [K4]; 1xTMT6plex [K12]; 1xTMT6plex [N-Term]	0.485934	0.044499	1	2	4	Q9Y3B1	PRELI domain containing protein 3B (Protein slowmo homolog 2)	PRELID3B C20orf45 SLMO2 CGI-107	0	2037.15	3	1.157	0.731	0.84	0.308	0.297	0.147	0.095	0.098	0.078										210.5	243.6	153.8	176.8	64.8	62.6	30.9	20	20.6	16.3		219.6	194.8
FALSE	FALSE		B4DVD7 [32-52]		Medium	[R].YVEMQAKENAYDLEANLAVLK.[L]	2xDeamidated [N16; N/Q]; 1xLRGG [K7]; 1xTMT6plex [K21]; 1xTMT6plex [N-Term]	0.487925	0.0447408	1	1	14	B4DVD7	Eukaryotic translation initiation factor 3 subunit K (eIF3k) (Eukaryotic translation initiation factor 3 subunit 12) (eIF-3 p25)	EIF3K EIF3S12	1	3255.73	2	1.117	1.039	1.126	0.264	0.198	0.16	0.108	0.08	0.133	0.592144	0.516193	0.404056	0.0853307	0.026828	0.0368453	0.0353441	0.0291008	0.0493462	191.3	203.2	208.4	215.4	50.4	39.7	30.6	19.6	14.6	26.8	192.3	182.8	201.5
FALSE	FALSE		Q6ZNA0 [365-381]; Q7Z7L9 [515-531]; F8W6Y9 [365-381]; A0A0C4DFQ3 [514-530]	5	Medium	[R].SQLVVHQRTHTGEKPYK.[C]	1xGG [K14]; 1xTMT6plex [K17]; 1xTMT6plex [N-Term]	0.489922	0.045009	1	4	3	Q6ZNA0	cDNA FLJ16290 fis, clone OCBBF2019684, highly similar to ZINC FINGER PROTEIN 29		1	2580.44	0	1.151	1.333	1.21	0.514	0.31	0.248	0.211	0.146	0.226										157.5	181.4	209.9	190.6	80.9	48.8	39	33.3	22.9	35.7	143.7	161
FALSE	FALSE		Q6ZTR5-2 [462-485]; Q6ZTR5 [462-485]; Q6ZTR5-1 [462-485]; A0A140T8X2 [462-485]; Q6ZTR5-4 [462-485]	3	Medium	[K].GKITGGGMVDVMCSFVPHQLGVFK.[V]	1xCarbamidomethyl [C13]; 1xDeamidated [Q19]; 1xOxidation [M]; 1xGG [K2]; 1xTMT6plex [K24]; 1xTMT6plex [N-Term]	0.491925	0.0452464	1	5	28	A0A140T8X2	Cilia- and flagella-associated protein 47	CFAP47	1	3153.63	3	1.214	1.31	1.292	0.882	0.932	0.899	0.887	0.865	0.908	0.124229	0.140557	0.142179	0.256773	0.39125	0.101847	0.449056	0.0998319	0.120742	95.5	120.4	125.1	127.4	89.6	89	85.9	91.4	86.8	89	94.4	102.8	95.2
FALSE	FALSE		H7BXF3 [19-35]; P62995-3 [60-76]; Q59GA1 [148-164]; Q68DZ9 [148-164]; Q8N1H4 [124-140]; B2RDQ3 [160-176]; P62995 [160-176]		Medium	[R].GFAFVYFENVDDAKEAK.[E]	2xLRGG [K14; K17]; 1xTMT6plex [N-Term]	0.493933	0.0456216	2	7	1	P62995-3; Q8N1H4	Transformer-2 protein homolog beta	TRA2B	1	2945.55	0	1.095	0.966	1.06	1.914	1.643	1.519	1.871	1.74	1.462										70.1	76.7	67.7	74.3	134.1	115.1	106.5	131.1	122	102.5			70.1
FALSE	FALSE		B0I1S1 [240-258]; A0A0J9YY17 [117-135]; A0A1C7CYW8 [1453-1471]; Q8IVF4 [1392-1410]		Medium	[K].EVAIEKAVKEILDTWENMK.[F]	1xOxidation [M18]; 1xLRGG [K6]; 2xTMT6plex [K9; K19]; 1xTMT6plex [N-Term]	0.493933	0.0456216	1	4	6	A0A1C7CYW8	Dynein heavy chain 10, axonemal	DNAH10	2	3332.89	1	1.108	0.722	0.805	0.205	0.187	0.134	0.159	0.139	0.132										217.8	241.3	157.3	175.2	44.7	40.8	29.1	34.7	30.3	28.8	223.8	207.3
FALSE	FALSE		P23368 [512-538]	5	Medium	[R].LYPPLANIQEVSINIAIKVTEYLYANK.[M]	1xDeamidated [N]; 1xGG [K18]; 1xTMT6plex [K27]; 1xTMT6plex [N-Term]	0.506111	0.047195	1	1	7	P23368	NAD-dependent malic enzyme, mitochondrial (NAD-ME) (EC 1.1.1.38) (Malic enzyme 2)	ME2	1	3651.04	1	1.172	1.444	1.13	1.502	0.928	0.899	0.319	0.658	0.37										106.1	124.4	153.3	119.9	159.4	98.5	95.5	33.9	69.8	39.3			106.1
FALSE	FALSE		B7Z2N2 [654-674]; H0UI15 [776-796]; O60641 [778-798]; H0YBT2 [119-139]; O60641-3 [471-491]; B7Z2C2 [535-555]; E9PDG8 [773-793]; O60641-4 [748-768]	6	Medium	[K].GDLQWNAGEKKLTGGANWQPK.[V]	2xDeamidated [N17; Q19]; 1xGG [K]; 2xTMT6plex [K21; K]; 1xTMT6plex [N-Term]	0.508161	0.0473872	1	8	4	B7Z2N2	cDNA FLJ57108, highly similar to Clathrin coat assembly protein AP180		2	3101.66	1	1.13	0.932	1.063	0.822	0.85	0.892	0.895	0.823	0.688										109.9	124.3	102.5	116.9	90.4	93.5	98	98.4	90.4	75.7	109.9
FALSE	FALSE		J3QTA0 [127-138]; B4DMH1 [127-138]; Q9BTA9 [172-183]; C9JD58 [127-138]; C9JVK6 [127-138]; Q9BTA9-5 [172-183]; Q9BTA9-3 [127-138]; A0A0A0MRT2 [127-138]; Q9BTA9-2 [127-138]	14	Medium	[K].EANKMAVNSFPK.[D]	2xDeamidated [N3; N8]; 1xGG [K4]; 1xTMT6plex [K12]; 1xTMT6plex [N-Term]	0.510217	0.0476252	3	9	8	Q9BTA9-5; Q9BTA9-3; A0A0A0MRT2	WW domain-containing adapter protein with coiled-coil	WAC	1	1910.01	1	1.241	1.284	1.329	1.013	0.919	0.923	0.474	0.963	1.014	0.517276	0.486621	0.300266	0.56428	0.342695	0.408893	0.210794	0.710849	0.448771	94.8	112	121.7	127.5	93.2	83	87.5	56.7	104.9	118.7	95	90.5	120.1
FALSE	FALSE		H0Y5D2 [1-18]	6	Medium	[-].XIRCGMKHGYAPSDLPVK.[A]	1xCarbamidomethyl [C4]; 1xGG [K7]; 1xTMT6plex [K18]; 1xTMT6plex [N-Term]	0.510217	0.0476252	1	1	4	H0Y5D2	General transcription factor 3C polypeptide 5 (Fragment)	GTF3C5	2	2598.4	2	1.297	1.347	1.13	0.437	0.418	0.41	0.171	0.206	0.186										151.5	196.5	204	171.2	66.2	63.3	62.1	25.9	31.3	28.1	132.7	168.5
FALSE	FALSE		Q5SZK8 [1640-1662]; Q5SZK8-2 [1640-1662]		Medium	[R].RPQVMKIQVLAVDNSVPQIAVNK.[G]	1xLRGG [K6]; 1xTMT6plex [K23]; 1xTMT6plex [N-Term]	0.512279	0.0478954	1	2	3	Q5SZK8	FRAS1-related extracellular matrix protein 2 (ECM3 homolog)	FREM2	1	3389	1	0.914	0.956	0.936	1.4	0.747	1.061	0.904	0.593	0.65	0.349036	0.25451	0.744046	0.126177	0.0629903	0.884635	0.297523	0.02694	0.0240478	108.4	102.1	103	99.3	160.9	84.1	108	98.6	65	70.5	102	115.2	108.6
FALSE	FALSE		K7EPM7 [7-19]; A0A0C4DGP3 [283-295]; B4DS20 [308-320]; D3DX46 [308-320]; Q13368 [283-295]		Medium	[R].AGLIPSKGFQERR.[FL]	1xDeamidated [Q10]; 1xLRGG [K7]; 1xTMT6plex [N-Term]	0.516421	0.0485486	2	5	4	B4DS20; D3DX46	cDNA FLJ60341, highly similar to MAGUK p55 subfamily member 3		2	2072.19	4	0.781	0.883	0.896	2.483	2.647	2.603	2.193	2.252	1.79	0.30098	0.40789	0.301045	0.0336521	0.0381615	0.057582	0.0575173	0.0461679	0.0532048	59.8	40.3	50.5	47.5	132.8	139.9	149.2	128.1	138.3	113.5	66.1	51.3	59.4
FALSE	FALSE		Q7Z7M3 [39-48]; Q13169 [62-71]; Q6NZ91 [59-68]; Q6NZ93 [59-68]; P60568 Q0GK43 [59-68]; Q16334 [55-64]; Q6QWN0 [39-48]; Q9C001 [59-68]; Q8NFA4 [18-27]; Q309Q7 [39-48]		Medium	[R].MLTFKFYMPK.[K]	1xOxidation [M8]; 1xLRGG [K5]; 1xTMT6plex [K10]; 1xTMT6plex [N-Term]	0.516421	0.0485486	1	10	8	Q7Z7M3	Interleukin-2 (IL-2)	IL2	1	2163.22	3	0.778	0.912	0.89	2.372	2.336	2.639	1.703	2.09	1.987	0.137993	0.307778	0.32673	0.0541289	0.0569635	0.0525211	0.0944106	0.0525039	0.0863322	60.1	48	54.8	52.8	142.5	137	158.5	97.2	129.8	119.3	75.5	52.4	59.7
FALSE	FALSE		Q6ZV66 [54-63]	2	Medium	[R].LSAICKMWPK.[N]	1xCarbamidomethyl [C5]; 1xOxidation [M7]; 1xGG [K6]; 1xTMT6plex [K10]; 1xTMT6plex [N-Term]	0.516421	0.0485486	1	1	2	Q6ZV66	cDNA FLJ42943 fis, clone BRSTN2003835		1	1822.01	1	0.783	0.764	0.783	1.785	1.414	2.033	1.281	1.1	1.224										82.2	64.4	62.8	64.4	146.7	116.3	167.1	105.3	90.4	100.6			82.2
FALSE	FALSE		Q6IRW3 [418-427]; B2R7C8 [418-427]; Q02383 [418-427]; A8K6Z6 [418-427]	3	Medium	[R].LNSGEKDVQK.[G]	1xDeamidated [N2]; 1xGG [K6]; 1xTMT6plex [K10]; 1xTMT6plex [N-Term]	0.5185	0.0488125	2	4	2	Q6IRW3; B2R7C8	Semenogelin II	SEMG2	1	1690.94	0	0.86	0.958	0.81	1.052	1.114	1.196	0.893	0.99	1.228										99	85.2	94.8	80.2	104.2	110.3	118.4	88.4	98	121.6		99
FALSE	FALSE		I3L1I5 A0A0A6YYC8 [294-324]	6	Medium	[R].ECVNGHQLLQGTFSGPSSCPLCGKPFLSSGK.[S]	3xCarbamidomethyl [C2; C19; C22]; 1xDeamidated [N/Q]; 1xGG [K24]; 1xTMT6plex [K31]; 1xTMT6plex [N-Term]	0.522677	0.0494494	1	1	16	I3L1I5 A0A0A6YYC8	Putative uncharacterized protein LOC100996504		0	3922.93	0	0.981	0.894	0.858	1.741	2.232	1.432	2.688	2.482	2.304	0.911401	0.678781	0.152732	0.0339327	0.114958	0.113745	0.0335366	0.0803678	0.068809	64.5	61	56.5	54.1	106	117.8	92.8	160.8	138.1	148.5	50.1	65.4	65.8
[truncated: 86 more columns]
