# Supplementary material for: The mechanistic study of novel immuno-adjuvant NCL-P2 improve the effectiveness of anti- PD-1 in colorectal cancer treatment through suppressing the expression of USP2
Source: Research Square preprint supplement (doi:10.21203/rs.3.rs-7274573/v1), 2025-10-17
Supplement: Supplementary file 4 [file dd62e59ac4bd1beaf857073a.xlsx]

## Sheet: Percolator_MultiConsensus_prote
Accession	Description	Sum(Coverage)	Sum(# Proteins)	Sum(# Unique Peptides)	Sum(# Peptides)	Sum(# PSMs)	A6: 127_C/126	A6: 127_C/126 Count	A6: 127_C/126 Variability [%]	A6: 127_N/126	A6: 127_N/126 Count	A6: 127_N/126 Variability [%]	A6: 128_C/126	A6: 128_C/126 Count	A6: 128_C/126 Variability [%]	A6: 128_N/126	A6: 128_N/126 Count	A6: 128_N/126 Variability [%]	A6: 129_C/126	A6: 129_C/126 Count	A6: 129_C/126 Variability [%]	A6: 129_N/126	A6: 129_N/126 Count	A6: 129_N/126 Variability [%]	A6: 130_C/126	A6: 130_C/126 Count	A6: 130_C/126 Variability [%]	A6: 130_N/126	A6: 130_N/126 Count	A6: 130_N/126 Variability [%]	A6: 131/126	A6: 131/126 Count	A6: 131/126 Variability [%]	B6: 127_C/126	B6: 127_C/126 Count	B6: 127_C/126 Variability [%]	B6: 127_N/126	B6: 127_N/126 Count	B6: 127_N/126 Variability [%]	B6: 128_C/126	B6: 128_C/126 Count	B6: 128_C/126 Variability [%]	B6: 128_N/126	B6: 128_N/126 Count	B6: 128_N/126 Variability [%]	B6: 129_C/126	B6: 129_C/126 Count	B6: 129_C/126 Variability [%]	B6: 129_N/126
Q09666	Neuroblast differentiation-associated protein AHNAK OS=Homo sapiens GN=AHNAK PE=1 SV=2 - [AHNK_HUMAN]	0.9467	12	296	552	3512	0.994	380	18.9	1.1	380	12.5	0.622	378	49.2	1.019	380	17.6	0.545	365	61	0.606	377	50.7	0.554	347	73.5	0.55	348	80.1	0.563	350	78.4	0.986	383	20.5	1.104	383	13.8	0.605	379	48.5	1.019	383	18.3	0.547	367	66.5	0.572
P46013	Proliferation marker protein Ki-67 OS=Homo sapiens GN=MKI67 PE=1 SV=2 - [KI67_HUMAN]	0.9364	3	251	503	3282	0.829	377	29.4	0.791	376	35.3	2.396	379	55	0.816	370	33.2	2.688	378	62.8	2.373	379	53.8	3.416	379	77.4	3.503	380	81	3.524	378	75.5	0.809	336	28.7	0.771	330	34.8	2.525	341	62.4	0.788	331	39.9	2.836	340	67.8	2.455
P12270	Nucleoprotein TPR OS=Homo sapiens GN=TPR PE=1 SV=3 - [TPR_HUMAN]	0.8138	16	170	347	2015	0.875	226	25.6	0.823	225	20.8	1.974	226	41.8	0.886	224	23.8	1.924	225	46.3	1.848	225	42.3	1.755	221	49.9	1.618	222	54.3	1.63	220	54.7	0.889	227	21.5	0.853	226	21.7	1.994	225	42.6	0.892	226	25.1	1.888	224	41.7	1.835
P15924	Desmoplakin OS=Homo sapiens GN=DSP PE=1 SV=3 - [DESP_HUMAN]	0.8635	15	157	382	1671	1.066	171	17.4	1.084	170	11.1	0.75	170	42.1	1.084	171	16.9	0.634	167	66.6	0.718	169	52.8	0.658	166	70.7	0.698	164	84.5	0.651	162	86.6	1.047	167	19.7	1.058	167	13.3	0.736	163	45.4	1.031	167	17.5	0.659	163	63.5	0.697
P78527	DNA-dependent protein kinase catalytic subunit OS=Homo sapiens GN=PRKDC PE=1 SV=3 - [PRKDC_HUMAN]	0.6592	11	140	348	1491	0.939	154	22.7	0.841	153	20.1	1.089	154	49.2	0.888	153	24.2	1.582	152	57.5	1.607	152	46.9	1.072	149	70.7	0.967	143	77.1	1.025	146	77.3	0.928	148	23.4	0.832	147	19.8	1.039	145	48.2	0.842	148	23.9	1.512	146	48.2	1.619
Q14204	Cytoplasmic dynein 1 heavy chain 1 OS=Homo sapiens GN=DYNC1H1 PE=1 SV=5 - [DYHC1_HUMAN]	0.6827	6	132	389	1411	1.205	115	22.4	1.111	114	17.1	0.78	108	53.2	1.105	115	21.2	0.768	105	59	0.808	109	56.2	0.816	96	90.1	0.857	92	69.7	0.829	96	78.1	1.214	122	20.7	1.097	121	17.6	0.788	116	62.9	1.081	121	18.5	0.738	114	77.7	0.764
P31327-3	Isoform 3 of Carbamoyl-phosphate synthase [ammonia], mitochondrial OS=Homo sapiens GN=CPS1 - [CPSM_HUMAN]	0.8592	14	127	177	2703	0.971	353	23.4	0.984	350	14.3	0.703	339	55.1	0.994	350	20	0.528	330	84.7	0.567	338	65.1	0.533	299	86.7	0.514	296	87.9	0.493	298	100	0.972	351	22.6	0.976	352	13.1	0.704	342	50.4	0.985	351	18.3	0.542	324	81.3	0.597
P09874	Poly [ADP-ribose] polymerase 1 OS=Homo sapiens GN=PARP1 PE=1 SV=4 - [PARP1_HUMAN]	0.9083	9	116	160	1558	0.788	226	28.1	0.717	226	34.8	2.533	229	49.8	0.766	225	32	2.787	229	60	2.316	229	54.8	2.554	226	74.7	2.263	225	71.5	2.151	224	67.4	0.809	247	31.6	0.725	245	39.6	2.651	248	52.8	0.78	245	38.3	2.967	247	56.7	2.404
Q9Y490	Talin-1 OS=Homo sapiens GN=TLN1 PE=1 SV=3 - [TLN1_HUMAN]	0.8489	4	116	234	1431	1.053	148	20.6	1.14	148	14.7	0.68	142	60.3	1.064	147	16.4	0.668	137	82.5	0.66	138	67.3	0.71	132	87.1	0.734	130	90.2	0.671	131	96	1.044	135	17.9	1.088	135	15.2	0.722	128	63.6	1.04	135	19.8	0.73	125	75.3	0.776
P49327	Fatty acid synthase OS=Homo sapiens GN=FASN PE=1 SV=3 - [FAS_HUMAN]	0.7806	8	114	191	1567	1.095	203	19.8	1.084	203	14.2	0.662	193	59.6	1.045	203	18.5	0.612	184	73.6	0.618	191	72.4	0.684	179	100	0.658	172	75	0.691	175	83.3	1.097	196	19.3	1.06	196	13.7	0.637	189	66.7	1.07	194	17	0.601	185	83.4	0.623
Q14683	Structural maintenance of chromosomes protein 1A OS=Homo sapiens GN=SMC1A PE=1 SV=2 - [SMC1A_HUMAN]	0.8986	14	110	223	1355	0.856	167	27.2	0.824	166	26.7	2.002	167	52.5	0.858	167	29.4	2.116	167	58.1	2.018	167	50.8	2.224	166	69.1	1.998	166	62.8	2.053	165	67.5	0.865	161	27.6	0.832	161	27.7	2.05	161	49.3	0.874	159	23.7	2.27	161	48.2	1.993
P07814	Bifunctional glutamate/proline--tRNA ligase OS=Homo sapiens GN=EPRS PE=1 SV=5 - [SYEP_HUMAN]	0.828	10	107	179	1274	1.037	164	17.4	1.084	164	11.6	0.596	158	69.2	1.018	164	16.9	0.558	156	84	0.62	159	65.2	0.608	145	95.2	0.564	141	84.9	0.563	145	98.6	1.031	151	20.2	1.1	151	12.5	0.516	148	74.5	1.035	151	18.3	0.468	140	87.8	0.512
P58107	Epiplakin OS=Homo sapiens GN=EPPK1 PE=1 SV=2 - [EPIPL_HUMAN]	0.8468	3	104	218	1319	1.035	134	16.9	1.082	134	14.4	0.717	127	49.7	1.065	135	19	0.632	125	76.5	0.693	127	48	0.685	120	81	0.625	120	80.1	0.709	115	77.7	1.05	135	16.7	1.094	134	14.3	0.748	128	53.9	1.059	134	16.2	0.716	118	68.7	0.744
O75643	U5 small nuclear ribonucleoprotein 200 kDa helicase OS=Homo sapiens GN=SNRNP200 PE=1 SV=2 - [U520_HUMAN]	0.786	11	100	191	1018	0.888	125	25	0.8	125	24.4	1.252	125	45.1	0.858	125	26	1.625	122	58.2	1.577	124	56	1.076	121	69.8	0.985	115	61	0.991	118	63.2	0.898	130	29.7	0.817	131	30.5	1.227	129	40.9	0.909	129	21.2	1.836	127	41.2	1.665
O75369-8	Isoform 8 of Filamin-B OS=Homo sapiens GN=FLNB - [FLNB_HUMAN]	0.7341	15	99	201	1152	1.06	132	18.3	1.101	132	14.6	0.691	132	48	1.051	132	17.2	0.59	129	62.9	0.652	129	57.3	0.648	124	81.8	0.699	118	82	0.667	124	79.3	1.047	134	16.6	1.087	134	12.1	0.647	132	46.8	1.043	134	13.4	0.584	129	72.4	0.606
P49454	Centromere protein F OS=Homo sapiens GN=CENPF PE=1 SV=2 - [CENPF_HUMAN]	0.8209	11	97	363	1278	0.903	69	23.4	0.838	69	20.4	1.865	68	55.6	0.852	69	23.3	2.1	68	52.3	1.858	65	52.4	2.071	66	66.1	1.941	65	67.5	1.752	65	65.5	0.94	78	24.1	0.857	79	17.3	1.769	79	37.8	0.908	79	23.3	1.888	77	31.8	1.803
P49792	E3 SUMO-protein ligase RanBP2 OS=Homo sapiens GN=RANBP2 PE=1 SV=2 - [RBP2_HUMAN]	0.7618	12	96	280	1270	0.902	106	16.8	0.812	105	21.7	1.742	105	39.6	0.882	105	19.4	2.086	104	38.8	2.155	106	35.6	1.505	105	42.5	1.455	101	44.8	1.493	103	48.8	0.929	103	20.6	0.891	103	20.1	1.855	103	33.8	0.908	103	19.5	2.132	103	45.3	2.086
Q14690	Protein RRP5 homolog OS=Homo sapiens GN=PDCD11 PE=1 SV=3 - [RRP5_HUMAN]	0.7499	4	96	180	948	0.822	126	32	0.772	126	34.2	1.608	127	46.5	0.776	127	34.9	2.328	127	57.5	2.19	127	53.8	3.059	127	66.4	2.189	127	69.3	2.73	127	64.2	0.791	114	36.4	0.731	114	41.5	1.658	116	44.9	0.771	113	39.1	2.508	115	53.3	2.32
P35579	Myosin-9 OS=Homo sapiens GN=MYH9 PE=1 SV=4 - [MYH9_HUMAN]	0.9061	16	95	319	2557	1.063	168	17.2	1.053	168	13.6	0.621	163	63.9	1.025	168	20.9	0.572	158	97.3	0.638	160	70.6	0.578	148	102.7	0.622	149	107.4	0.569	152	112.2	1.07	175	20.8	1.063	175	15	0.666	170	48.7	1.055	174	19	0.632	162	67.7	0.647
Q00610-2	Isoform 2 of Clathrin heavy chain 1 OS=Homo sapiens GN=CLTC - [CLH1_HUMAN]	0.7419	17	94	141	1167	1.146	153	25.2	0.959	153	13.6	0.704	148	52	1.028	152	18.4	0.689	146	58.6	0.712	147	57.2	0.678	136	100.8	0.623	134	102.8	0.704	133	108.6	1.152	153	21.2	0.967	150	14.1	0.689	144	54	1.04	152	18.5	0.643	142	76.2	0.677
Q9UQE7	Structural maintenance of chromosomes protein 3 OS=Homo sapiens GN=SMC3 PE=1 SV=2 - [SMC3_HUMAN]	0.8833	3	93	197	1147	0.837	129	24.7	0.801	129	32.5	2.238	129	55.4	0.821	129	29.7	2.253	131	60.4	2.072	130	55.2	2.391	130	85.7	2.379	128	82	2.232	129	75.7	0.823	127	30.2	0.781	127	36.1	2.121	128	53.3	0.813	128	35.4	2.202	127	61	2.018
P42704	Leucine-rich PPR motif-containing protein, mitochondrial OS=Homo sapiens GN=LRPPRC PE=1 SV=3 - [LPPRC_HUMAN]	0.8759	12	91	166	1227	0.953	158	16.5	0.888	157	13.9	0.613	154	49.8	0.979	157	17.5	0.506	145	68.8	0.591	154	64.5	0.548	133	80.7	0.524	136	86.2	0.539	137	91.9	0.978	158	21.2	0.904	157	16.4	0.565	155	52.5	0.979	157	18.5	0.505	145	66.9	0.55
Q9NR30	Nucleolar RNA helicase 2 OS=Homo sapiens GN=DDX21 PE=1 SV=5 - [DDX21_HUMAN]	0.9361	4	91	150	1920	0.832	264	36.6	0.789	255	43	2.165	266	63.6	0.804	258	37.6	2.645	268	68.1	2.164	269	63.6	3.978	267	80.5	4.02	266	104.7	3.81	266	88.4	0.798	247	40	0.771	243	43.8	2.151	253	56.9	0.792	247	40.5	2.597	251	63.7	2.136
P46940	Ras GTPase-activating-like protein IQGAP1 OS=Homo sapiens GN=IQGAP1 PE=1 SV=1 - [IQGA1_HUMAN]	0.7809	13	90	179	1442	1.038	166	24.5	1.096	165	15.7	0.617	163	51.9	1.057	166	22	0.559	156	55.6	0.633	162	62.9	0.573	145	85.9	0.567	138	80.3	0.541	148	100.5	1.058	161	24.7	1.076	162	15.5	0.646	151	54.6	1.05	162	20.9	0.617	143	67.5	0.628
P02545	Prelamin-A/C OS=Homo sapiens GN=LMNA PE=1 SV=1 - [LMNA_HUMAN]	0.9142	15	89	133	2201	0.827	290	30.7	0.774	281	34.6	2.313	297	66.2	0.816	282	36.1	2.968	297	73.4	2.221	297	65.5	3.121	293	86.1	3.015	294	82.7	3.336	295	82	0.831	277	33.2	0.776	269	34.9	2.548	282	58.6	0.845	272	31.7	3.316	282	70.5	2.4
Q08211	ATP-dependent RNA helicase A OS=Homo sapiens GN=DHX9 PE=1 SV=4 - [DHX9_HUMAN]	0.8276	9	88	142	1506	0.826	189	31.5	0.786	188	36.5	1.552	186	46.7	0.794	186	30.6	2.076	187	60.7	1.914	186	53.1	1.992	180	72.3	1.578	182	64.8	1.765	182	68.7	0.834	189	30.4	0.78	190	30.8	1.547	188	45.7	0.819	189	31.9	2.137	190	63.9	1.999
J9R021	Eukaryotic translation initiation factor 3 subunit A OS=Homo sapiens GN=eIF3a PE=2 SV=1 - [J9R021_HUMAN]	0.7713	12	88	188	940	1.022	105	24.7	1.078	104	11.9	0.66	98	63.1	1.031	105	17.6	0.554	98	95.8	0.668	96	74.3	0.564	93	101.6	0.577	88	116.8	0.58	92	117	1.041	112	18.4	1.063	112	12.9	0.661	101	61.7	1.022	112	17.9	0.604	99	74.2	0.637
E1NZA1	Peroxisome proliferator activated receptor interacting complex protein OS=Homo sapiens GN=PRIC295 PE=2 SV=1 - [E1NZA1_HUMAN]	0.72	4	86	213	794	1.203	77	21.7	1.098	75	11.9	0.773	70	60.3	1.099	76	14.2	0.733	70	75.5	0.817	72	51.5	0.64	67	80.2	0.716	59	74.5	0.692	63	78.1	1.144	71	18.2	1.028	72	18.5	0.73	68	51	1.115	71	20.4	0.639	65	81	0.695
O95347	Structural maintenance of chromosomes protein 2 OS=Homo sapiens GN=SMC2 PE=1 SV=2 - [SMC2_HUMAN]	0.8622	16	83	157	723	0.961	87	19.5	1.016	87	11	1.037	86	41.6	0.956	87	17.5	0.955	85	45.3	0.98	85	40.9	0.994	83	59.9	0.945	82	56.6	0.875	83	57	0.981	85	16.2	1.015	85	12.5	1.035	83	40	0.972	85	20.9	1.001	83	49.3	1.015
Q86UP2	Kinectin OS=Homo sapiens GN=KTN1 PE=1 SV=1 - [KTN1_HUMAN]	0.8622	20	83	187	865	0.986	82	15.3	0.928	82	14.2	0.885	81	47.8	1.013	82	14	0.772	80	59.2	0.817	80	41.9	0.67	78	97.2	0.694	76	104.7	0.698	75	83.5	1.005	87	18.4	0.951	87	11.9	0.864	84	37.1	0.988	86	18.8	0.748	84	49.2	0.8
P13639	Elongation factor 2 OS=Homo sapiens GN=EEF2 PE=1 SV=4 - [EF2_HUMAN]	0.8741	7	81	103	2083	1.037	296	19.8	1.092	297	13.7	0.575	280	64.5	1.024	296	19.4	0.552	269	83.1	0.573	278	65.8	0.488	258	110.1	0.501	236	99	0.501	248	91.2	1.006	277	23.9	1.07	277	14.7	0.565	256	62.1	1.013	277	22.1	0.529	251	87.2	0.571
O75533	Splicing factor 3B subunit 1 OS=Homo sapiens GN=SF3B1 PE=1 SV=3 - [SF3B1_HUMAN]	0.8021	11	78	126	767	0.861	87	26.8	0.796	86	29.4	1.414	88	38.9	0.899	86	28.1	1.851	87	38	1.869	88	36.4	1.483	84	66.3	1.23	83	81.7	1.453	83	61.7	0.87	94	33.7	0.782	90	39.5	1.486	93	44	0.846	94	34.3	1.894	94	44.3	1.834
Q6P2Q9	Pre-mRNA-processing-splicing factor 8 OS=Homo sapiens GN=PRPF8 PE=1 SV=2 - [PRP8_HUMAN]	0.6591	29	78	193	848	0.85	76	25.8	0.8	76	30.7	1.263	76	40.1	0.828	76	22.5	1.923	76	44.2	1.935	76	43.3	1.025	75	77.5	0.924	74	85.5	1.078	75	68.1	0.853	82	24.1	0.774	82	29.5	1.289	82	47.4	0.831	82	25.2	1.953	82	55.5	1.873
A7BI36	p180/ribosome receptor OS=Homo sapiens GN=RRBP1 PE=2 SV=2 - [A7BI36_HUMAN]	0.8675	27	78	188	901	0.987	84	13	0.989	84	13.6	1.043	84	31.5	0.965	84	20.7	0.942	84	46.7	0.957	83	39.9	0.958	83	60	1.039	83	60.9	0.975	83	72.8	1.031	87	12.9	1.003	87	11.9	0.999	87	34.1	0.955	87	15.8	0.961	87	43	0.97
P55072	Transitional endoplasmic reticulum ATPase OS=Homo sapiens GN=VCP PE=1 SV=4 - [TERA_HUMAN]	0.9566	11	77	111	1420	1.071	202	21.9	1.094	202	13	0.825	198	54.3	1.097	202	21.7	0.761	193	68.1	0.803	196	49	0.732	179	97.1	0.739	170	89	0.751	174	103.5	1.076	193	20.2	1.103	192	14.3	0.828	187	57.2	1.077	191	17.1	0.732	176	71.2	0.795
Q9UIG0	Tyrosine-protein kinase BAZ1B OS=Homo sapiens GN=BAZ1B PE=1 SV=2 - [BAZ1B_HUMAN]	0.8233	2	77	191	786	0.799	76	34.7	0.768	76	37.4	2.198	78	43.2	0.797	75	37.7	2.381	78	62.5	2.194	78	49.4	2.077	77	70.7	1.748	76	67.6	1.851	74	60.3	0.81	76	34.4	0.746	75	35.1	2.233	77	45.6	0.82	76	38.9	2.693	78	62.4	2.382
A6NHR9	Structural maintenance of chromosomes flexible hinge domain-containing protein 1 OS=Homo sapiens GN=SMCHD1 PE=1 SV=2 - [SMHD1_HUMAN]	0.7551	8	76	191	800	0.871	79	26.2	0.79	79	26.6	2.054	79	42.4	0.882	79	23.7	2.127	79	49.2	2.048	79	39.6	2.331	78	49.2	1.888	79	44.6	1.847	79	54.7	0.846	88	21.3	0.811	88	27.9	1.992	88	40.8	0.805	88	20.8	2.175	88	59.4	2.052
P11387	DNA topoisomerase 1 OS=Homo sapiens GN=TOP1 PE=1 SV=2 - [TOP1_HUMAN]	0.8601	22	76	121	955	0.811	136	37.6	0.778	134	33.9	2.434	135	58.7	0.821	133	37.4	2.837	136	65.4	2.357	135	61.3	3.595	135	82.1	3.432	134	92.9	3.587	135	84.3	0.844	130	28	0.794	130	39.4	2.147	131	58.6	0.845	128	32.5	2.6	131	59	2.152
Q92878	DNA repair protein RAD50 OS=Homo sapiens GN=RAD50 PE=1 SV=1 - [RAD50_HUMAN]	0.8758	17	76	195	711	0.864	65	23	0.861	65	22.7	1.505	64	43	0.848	65	18.6	1.718	64	52	1.586	64	43.4	1.686	64	68.7	1.5	63	60.2	1.437	64	59.9	0.871	66	27.3	0.885	65	22.4	1.706	65	44.3	0.85	65	21.1	1.863	64	47.6	1.594
A0A024R4E5	High density lipoprotein binding protein (Vigilin), isoform CRA_a OS=Homo sapiens GN=HDLBP PE=1 SV=1 - [A0A024R4E5_HUMAN]	0.8312	33	76	166	745	1.002	83	24.6	1.122	83	14.5	0.777	83	48.2	1.103	83	21.3	0.674	82	69.3	0.732	83	60.6	0.602	81	108.2	0.615	78	106.2	0.677	78	111.5	1.03	78	22.3	1.106	78	11.3	0.798	77	46.5	1.044	78	16.4	0.744	75	63.7	0.81
P11388-4	Isoform 4 of DNA topoisomerase 2-alpha OS=Homo sapiens GN=TOP2A - [TOP2A_HUMAN]	0.794	6	75	189	1069	0.761	81	33.6	0.744	82	38.5	1.919	82	45.9	0.78	82	36.3	2.333	82	51.9	2.094	82	40.2	2.18	82	67.9	1.752	82	70.9	1.744	82	60	0.841	79	29.4	0.807	79	29.7	1.66	78	51.8	0.795	79	32.9	2.14	78	66.1	1.895
P31948-2	Isoform 2 of Stress-induced-phosphoprotein 1 OS=Homo sapiens GN=STIP1 - [STIP1_HUMAN]	0.8627	7	74	122	889	1.017	110	26.2	1.157	110	10.1	0.586	109	50.5	1.057	110	19.7	0.501	101	79.9	0.561	108	77.6	0.527	103	103.8	0.533	96	95.3	0.508	98	94.3	1.035	122	24.7	1.198	122	13.6	0.588	118	60.8	1.046	122	20.9	0.498	114	78.1	0.598
P18206	Vinculin OS=Homo sapiens GN=VCL PE=1 SV=4 - [VINC_HUMAN]	0.8942	9	72	156	1015	1.083	96	19.9	1.157	96	14	0.623	93	56.2	1.027	96	21.4	0.544	91	101.2	0.562	93	70.5	0.597	81	113.5	0.555	84	106.2	0.572	88	114.5	1.091	108	28.5	1.156	107	15.5	0.65	105	67.9	1.03	107	22.8	0.573	99	90.4	0.633
P34932	Heat shock 70 kDa protein 4 OS=Homo sapiens GN=HSPA4 PE=1 SV=4 - [HSP74_HUMAN]	0.9298	23	70	113	1092	1.026	134	18.4	1.133	134	12.4	0.62	134	61.9	1.05	134	15.6	0.561	129	84.6	0.626	134	66.5	0.591	127	91.5	0.626	120	90.8	0.574	127	106.2	1.017	130	18.4	1.099	130	12.7	0.567	130	63.4	1.069	130	19	0.515	125	91.2	0.578
Q9Y5B9	FACT complex subunit SPT16 OS=Homo sapiens GN=SUPT16H PE=1 SV=1 - [SP16H_HUMAN]	0.7612	2	69	124	793	0.784	104	37.2	0.781	103	32.4	2.002	104	52.3	0.796	103	37.8	2.624	104	58.8	2.14	104	54.2	2.223	104	77.9	2.022	103	69.1	1.914	99	78.8	0.742	87	32.9	0.746	87	37.8	1.909	88	62.1	0.738	86	34.5	2.324	88	75.7	2.222
P14625	Endoplasmin OS=Homo sapiens GN=HSP90B1 PE=1 SV=1 - [ENPL_HUMAN]	0.8692	12	67	107	1225	1.035	163	24.6	1.04	163	12.7	0.732	161	48	1.048	163	17.6	0.556	153	71.1	0.635	154	52.4	0.499	141	112.1	0.573	137	116.6	0.522	138	118.7	1.007	157	23.8	1.037	157	15.6	0.731	150	44.6	1.034	157	17.7	0.598	146	68.2	0.632
Q4LE36	ACLY variant protein (Fragment) OS=Homo sapiens GN=ACLY variant protein PE=2 SV=1 - [Q4LE36_HUMAN]	0.7177	7	67	104	872	0.985	110	15.3	1.017	110	15.1	0.886	108	44.1	1.025	109	20.5	0.666	105	68.6	0.903	109	45.4	0.831	104	78.6	0.788	103	104.1	0.725	100	100.8	1.009	113	18.5	1.042	111	13.6	0.857	112	34.6	1.002	112	17	0.758	108	67.3	0.889
P13010	X-ray repair cross-complementing protein 5 OS=Homo sapiens GN=XRCC5 PE=1 SV=3 - [XRCC5_HUMAN]	0.9139	5	66	99	1207	0.956	150	26.6	0.945	148	16.5	1.143	146	48.8	0.998	149	25.6	1.178	144	62.8	1.1	146	45.9	0.996	139	76	0.938	135	71.3	0.826	130	84.2	0.953	155	25.8	0.953	157	17.9	1.154	154	43.4	0.967	156	22.7	1.247	152	51.8	1.073
P42285	Superkiller viralicidic activity 2-like 2 OS=Homo sapiens GN=SKIV2L2 PE=1 SV=3 - [SK2L2_HUMAN]	0.7121	7	66	112	698	0.876	85	28.7	0.864	87	25.3	1.492	84	39	0.857	86	27.1	1.825	84	42.8	1.771	87	31.8	2.225	85	56.9	1.699	79	73.4	2.118	81	56.1	0.894	85	29.2	0.842	84	28.8	1.398	85	39.3	0.873	84	29	1.976	82	52	1.719
Q15029	116 kDa U5 small nuclear ribonucleoprotein component OS=Homo sapiens GN=EFTUD2 PE=1 SV=1 - [U5S1_HUMAN]	0.8035	16	66	90	763	0.9	101	28.6	0.874	101	25.3	1.493	97	41.8	0.867	101	27.3	1.561	97	45.6	1.542	99	40.5	1.44	93	50	1.105	91	58.5	1.113	90	62.7	0.893	101	30.2	0.837	99	20.3	1.404	98	41.8	0.857	98	23.3	1.65	97	54.4	1.616
Q7KZ85	Transcription elongation factor SPT6 OS=Homo sapiens GN=SUPT6H PE=1 SV=2 - [SPT6H_HUMAN]	0.7289	8	66	158	669	0.941	65	24.8	0.951	65	18.2	1.698	65	50.2	0.928	65	23.8	2.076	64	51.6	1.895	64	47.2	1.935	63	81.2	1.635	62	69.9	1.681	59	70.8	0.91	75	26.9	0.875	74	23	1.766	75	35.7	0.878	75	35.9	2.01	74	49	1.738
P11021	78 kDa glucose-regulated protein OS=Homo sapiens GN=HSPA5 PE=1 SV=2 - [GRP78_HUMAN]	0.7599	6	65	89	1357	1.011	181	21.7	1.029	181	13.2	0.926	180	44	1.033	181	23.5	0.809	179	52.4	0.822	180	52.9	0.699	175	68.2	0.702	168	76.1	0.707	170	73.5	1.019	188	23.5	1.05	187	13.4	0.913	186	42.2	1.029	188	19.5	0.801	182	52.5	0.804
P11586	C-1-tetrahydrofolate synthase, cytoplasmic OS=Homo sapiens GN=MTHFD1 PE=1 SV=3 - [C1TC_HUMAN]	0.8545	5	65	97	653	0.983	89	20.4	1.059	88	16.5	0.92	88	43.1	0.974	89	19	0.885	87	62.5	0.978	89	48.8	0.932	84	70.8	0.875	86	64.5	0.854	83	72.8	1.022	94	22.2	1.072	94	15.3	0.944	94	50.8	1.02	94	19	0.754	91	64.3	0.907
P12956	X-ray repair cross-complementing protein 6 OS=Homo sapiens GN=XRCC6 PE=1 SV=2 - [XRCC6_HUMAN]	0.9015	7	65	89	1034	0.938	149	24.5	0.927	150	16.6	1.102	147	56.1	0.929	150	16.4	1.248	146	61.3	1.141	146	55.6	1.141	140	89.1	1.099	134	78.6	1.055	137	77.5	0.952	144	25	0.963	143	20.9	1.131	140	57.7	0.943	142	27.3	1.178	135	62.9	1.065
Q7Z6Z7	E3 ubiquitin-protein ligase HUWE1 OS=Homo sapiens GN=HUWE1 PE=1 SV=3 - [HUWE1_HUMAN]	0.5448	15	64	242	843	1.224	61	21.6	1.165	59	15.5	0.762	58	50.5	1.092	60	22.3	0.759	57	74.7	0.855	61	52.1	0.77	53	75.6	0.836	54	68.7	0.883	52	81.8	1.173	57	22.4	1.111	57	19.5	0.81	55	65.5	1.046	57	17	0.813	50	71.6	0.81
Q59FF0	EBNA-2 co-activator variant (Fragment) OS=Homo sapiens PE=2 SV=1 - [Q59FF0_HUMAN]	0.8143	6	64	98	775	1.006	93	19.2	1.027	94	12.1	0.784	90	49.3	1.044	94	18.4	0.692	90	47.7	0.755	92	50.4	0.68	87	59	0.686	85	55	0.621	85	82.3	0.96	84	21.6	1.017	85	14.7	0.745	83	41.3	1.01	84	16.8	0.69	81	46.1	0.754
Q14676	Mediator of DNA damage checkpoint protein 1 OS=Homo sapiens GN=MDC1 PE=1 SV=3 - [MDC1_HUMAN]	0.753	14	63	151	646	0.917	60	30.8	0.859	58	32.2	1.819	59	39.9	0.901	58	40.2	2.132	60	54.9	1.993	60	52.3	1.993	58	78.6	1.821	58	72.2	2.04	58	64.1	0.851	67	31.6	0.836	66	30.4	2.096	70	45.7	0.901	66	42.9	2.22	71	66	2.058
Q9BTC0	Death-inducer obliterator 1 OS=Homo sapiens GN=DIDO1 PE=1 SV=5 - [DIDO1_HUMAN]	0.7152	4	63	189	680	0.872	56	27.6	0.76	56	35.1	2.189	57	35.7	0.822	55	28.5	2.49	57	49.8	2.162	57	51.7	2.194	57	65.1	2.123	55	60.4	2.084	57	60.4	0.884	62	19.7	0.845	61	26.8	2.285	61	49.7	0.84	61	21.3	2.514	61	81.4	2.265
Q9UQ35	Serine/arginine repetitive matrix protein 2 OS=Homo sapiens GN=SRRM2 PE=1 SV=2 - [SRRM2_HUMAN]	0.7362	17	63	299	1208	0.861	95	22.8	0.833	94	24.9	2.308	95	68.3	0.877	94	25.2	2.453	95	71	2.273	94	67.4	2.243	93	84.5	2.092	93	70.2	2.107	95	83.2	0.881	102	27.8	0.818	100	32.3	2.285	102	65.5	0.883	100	29.9	2.256	102	64.5	2.179
A0A024QZW7	Nucleoporin 153kDa, isoform CRA_a OS=Homo sapiens GN=NUP153 PE=4 SV=1 - [A0A024QZW7_HUMAN]	0.6719	4	63	115	610	0.823	80	24.6	0.718	80	32.6	2.367	80	52.2	0.794	80	27.6	2.458	80	56.7	2.307	80	45.8	2.383	80	69.7	2.094	80	65.4	1.958	80	64.6	0.842	78	31.5	0.756	78	34	2.272	78	57.1	0.816	78	34.4	2.511	78	51.7	2.278
P33176	Kinesin-1 heavy chain OS=Homo sapiens GN=KIF5B PE=1 SV=1 - [KINH_HUMAN]	0.8712	22	62	125	638	1.028	68	17.6	1.077	68	14.7	0.684	67	44.3	1.062	68	13.5	0.647	66	64	0.68	65	53.5	0.641	64	82.5	0.619	63	80.1	0.634	63	62.9	1.055	69	16.9	1.133	68	11.9	0.639	66	50.5	1.053	69	17.6	0.56	64	64.2	0.595
Q13435	Splicing factor 3B subunit 2 OS=Homo sapiens GN=SF3B2 PE=1 SV=2 - [SF3B2_HUMAN]	0.7128	8	62	102	1007	0.894	124	31.3	0.835	124	24.2	1.929	122	48.3	0.914	123	23	2.199	123	59.1	1.971	124	51.9	2.015	121	62.6	1.947	119	64.8	2.179	122	60.5	0.931	116	26	0.851	114	27	1.846	115	51.6	0.875	115	29.3	2.038	116	56.4	1.902
Q9BQG0-2	Isoform 2 of Myb-binding protein 1A OS=Homo sapiens GN=MYBBP1A - [MBB1A_HUMAN]	0.705	7	62	116	657	0.697	73	32.8	0.688	71	46.2	1.357	73	50.2	0.697	72	38	2.118	73	62.5	2.198	73	51	1.865	69	87.1	1.461	72	96.2	2.056	72	65.4	0.754	81	41.6	0.713	80	32.2	1.358	81	66.1	0.778	81	32.2	2.056	81	76.4	2.051
A0A0C4DGG9	Chromodomain-helicase-DNA-binding protein 4 OS=Homo sapiens GN=CHD4 PE=1 SV=1 - [A0A0C4DGG9_HUMAN]	0.7651	10	62	194	1036	0.811	78	30.3	0.746	79	38.6	1.991	80	46.7	0.802	78	24.5	2.257	79	53.4	1.852	80	54.6	1.846	79	54.1	1.491	77	49.3	1.633	78	53.8	0.781	92	35.7	0.755	91	40.4	1.958	92	45.7	0.758	91	40	2.228	92	46.1	2.012
P24928	DNA-directed RNA polymerase II subunit RPB1 OS=Homo sapiens GN=POLR2A PE=1 SV=2 - [RPB1_HUMAN]	0.6975	6	61	173	820	0.941	60	23.9	0.917	60	23.1	1.742	60	40.8	0.966	60	18.3	1.744	60	51.2	1.671	60	38.5	1.864	60	47.9	1.494	58	51.3	1.409	60	46.8	0.917	67	19.5	0.846	67	22.3	1.689	67	44.1	0.88	67	27.2	1.869	67	54.4	1.68
Q5UIP0-2	Isoform 2 of Telomere-associated protein RIF1 OS=Homo sapiens GN=RIF1 - [RIF1_HUMAN]	0.6296	6	61	173	800	0.805	60	25.7	0.735	60	36.7	2.251	60	50.4	0.817	60	32.6	2.501	60	65.2	2.52	60	66.2	1.97	59	78.8	1.723	59	97.3	1.935	59	70.8	0.832	64	25.3	0.744	64	39.9	1.827	64	39.5	0.785	65	29.9	2.255	65	45.8	2.144
Q59HH3	Trifunctional purine biosynthetic protein adenosine-3 (Fragment) OS=Homo sapiens PE=2 SV=1 - [Q59HH3_HUMAN]	0.8174	15	61	89	666	1.015	92	23.4	1.086	93	13.4	0.644	88	68.6	1.029	93	15.6	0.618	85	73.1	0.612	88	67.2	0.72	80	93.1	0.624	81	91.5	0.655	81	79	1.063	90	18.2	1.112	90	10.5	0.589	88	67.2	1.059	90	16.1	0.516	86	90.5	0.605
Q9BVJ6	U3 small nucleolar RNA-associated protein 14 homolog A OS=Homo sapiens GN=UTP14A PE=1 SV=1 - [UT14A_HUMAN]	0.8768	7	60	111	755	0.872	89	29.3	0.795	91	33.4	2.176	91	71.1	0.867	88	34.3	2.627	89	70.7	2.401	89	66.2	4.122	88	106.4	4.141	89	111.6	4.726	88	104.6	0.875	93	30.3	0.819	91	37.6	2.169	91	72	0.879	91	37.3	2.428	91	81.8	2.053
B4DZC0	cDNA FLJ51771, highly similar to SWI/SNF-related matrix-associatedactin-dependent regulator of chromatin subfamily A member5 (EC 3.6.1.-) OS=Homo sapiens PE=2 SV=1 - [B4DZC0_HUMAN]	0.7337	11	60	123	632	0.699	82	40.7	0.654	82	44	1.849	82	26.5	0.712	81	38.5	2.212	83	45.8	2.085	83	42.5	2.029	80	50.5	1.673	80	53.5	1.69	81	48.2	0.768	64	31.3	0.705	63	33.1	2.025	66	48.2	0.746	64	35.5	2.42	66	61.1	2.269
P08670	Vimentin OS=Homo sapiens GN=VIM PE=1 SV=4 - [VIME_HUMAN]	0.9785	21	59	89	2533	1.041	298	22.8	1.116	297	13.9	0.667	284	64.5	1.08	299	20.5	0.581	274	82.1	0.62	285	72.1	0.593	256	89.2	0.615	253	93	0.579	257	99.6	1.065	310	21.1	1.141	309	14.6	0.669	302	62	1.089	310	22.5	0.564	284	79.9	0.624
P17844	Probable ATP-dependent RNA helicase DDX5 OS=Homo sapiens GN=DDX5 PE=1 SV=1 - [DDX5_HUMAN]	0.8388	18	59	101	1505	0.865	131	24.8	0.825	131	35.5	2.295	134	53.3	0.803	131	39.4	2.531	133	67.5	2.198	134	52.8	2.565	133	65.6	2.433	132	70	2.148	132	61.4	0.836	132	33.2	0.829	133	39	2.344	135	62.5	0.865	132	36.3	2.477	135	72.7	2.206
P20700	Lamin-B1 OS=Homo sapiens GN=LMNB1 PE=1 SV=2 - [LMNB1_HUMAN]	0.8447	6	59	106	1221	0.888	159	28.2	0.818	159	30.1	2.396	162	66.2	0.847	158	29	2.586	162	70.6	2.272	162	57.8	2.41	160	75.5	2.084	159	80.9	2.23	156	77	0.842	148	28.4	0.812	148	35.2	2.365	150	60.3	0.848	147	24.9	2.663	149	63.5	2.239
P40939	Trifunctional enzyme subunit alpha, mitochondrial OS=Homo sapiens GN=HADHA PE=1 SV=2 - [ECHA_HUMAN]	0.8702	7	59	81	592	1.038	81	21.6	1.015	82	14.3	0.71	81	50.3	1.039	82	19.6	0.561	75	57.6	0.636	79	48.6	0.477	73	92.7	0.539	67	79.8	0.501	72	100.5	1.017	86	22.5	0.984	86	15.7	0.724	83	39.4	1.017	85	22.2	0.634	78	49.6	0.726
B2RCM2	cDNA, FLJ96156, highly similar to Homo sapiens leucyl-tRNA synthetase (LARS), mRNA OS=Homo sapiens PE=2 SV=1 - [B2RCM2_HUMAN]	0.7517	16	59	115	618	1.04	68	20	1.099	68	14.1	0.661	66	47.4	1.065	68	16.7	0.589	64	64.8	0.649	66	54.1	0.665	64	72.5	0.627	61	81.7	0.662	62	57.9	1.018	71	17.2	1.082	71	12.9	0.65	70	45.2	1.026	71	18.1	0.61	68	62.7	0.664
O00566	U3 small nucleolar ribonucleoprotein protein MPP10 OS=Homo sapiens GN=MPHOSPH10 PE=1 SV=2 - [MPP10_HUMAN]	0.6681	3	58	92	599	0.903	87	28.4	0.868	88	29.7	2.056	88	43.6	0.912	88	34.8	2.588	87	58.1	2.159	87	56.6	4.512	89	93.4	4.73	89	100.4	5.361	88	86	0.901	84	28.3	0.901	80	28.1	2.275	84	43.2	0.865	84	34.6	2.747	84	56.2	2.337
P78347-4	Isoform 4 of General transcription factor II-I OS=Homo sapiens GN=GTF2I - [GTF2I_HUMAN]	0.8577	20	58	110	706	0.845	80	24.4	0.828	80	28.2	1.857	80	42.9	0.829	80	32.4	2.04	79	47.6	1.917	79	42.5	1.623	80	54.6	1.514	78	57.6	1.566	79	51.5	0.834	71	28.1	0.812	70	26.1	1.786	69	44.4	0.839	70	29.2	1.937	69	51.5	1.744
Q15393	Splicing factor 3B subunit 3 OS=Homo sapiens GN=SF3B3 PE=1 SV=4 - [SF3B3_HUMAN]	0.7387	11	58	100	892	0.85	98	27.9	0.821	95	26	1.497	95	47.7	0.87	95	23.8	1.92	96	52.8	1.78	97	49.6	1.286	93	56.8	1.103	90	77.9	1.181	93	70.2	0.885	98	26.8	0.832	97	27.9	1.481	98	48.5	0.857	97	28.4	1.843	99	57.5	1.789
B3KY60	cDNA FLJ16777 fis, clone BRHIP2029567, highly similar to Cell division cycle 5-like protein OS=Homo sapiens PE=2 SV=1 - [B3KY60_HUMAN]	0.9127	6	58	101	631	0.881	82	26.5	0.855	79	28.9	2.041	81	43.2	0.882	80	20.7	2.232	82	41	2.003	82	41.9	1.965	82	51.2	1.922	82	51.2	1.957	80	49.6	0.873	80	24.5	0.84	77	24.8	1.999	81	43.2	0.923	78	27.1	2.197	80	45.9	1.855
O15381	Nuclear valosin-containing protein-like OS=Homo sapiens GN=NVL PE=1 SV=1 - [NVL_HUMAN]	0.8318	21	57	98	663	0.9	72	29.7	0.918	72	20.3	2.061	72	64.5	0.879	72	35.1	2.265	70	64.8	2.019	73	66.9	3.304	72	69.1	3.744	72	73.2	3.06	72	77.5	0.854	79	23.7	0.865	80	26.2	1.665	79	52.8	0.883	78	29.4	1.984	79	78.4	1.823
P26038	Moesin OS=Homo sapiens GN=MSN PE=1 SV=3 - [MOES_HUMAN]	0.9601	5	57	119	1236	1.033	112	18.3	1.11	112	14.8	0.665	106	47.7	1.058	112	15.2	0.548	102	67.1	0.615	106	56.2	0.638	97	63.7	0.613	100	76.4	0.617	101	65.8	0.997	111	19.2	1.084	111	14.6	0.611	104	48.4	1.054	111	16.3	0.536	99	63.5	0.608
P49588	Alanine--tRNA ligase, cytoplasmic OS=Homo sapiens GN=AARS PE=1 SV=2 - [SYAC_HUMAN]	0.8254	3	57	96	900	1.068	117	15.1	1.189	117	15.6	0.609	113	52.7	1.094	116	15.8	0.498	107	87.9	0.604	114	52.9	0.559	104	81.5	0.543	100	88.8	0.565	102	95.8	1.053	107	15.3	1.156	107	12	0.601	104	56.1	1.077	107	17.3	0.55	101	80	0.596
Q9NTJ3	Structural maintenance of chromosomes protein 4 OS=Homo sapiens GN=SMC4 PE=1 SV=2 - [SMC4_HUMAN]	0.7384	15	57	156	709	0.98	68	17.6	1.036	68	15.2	1.104	68	42.5	1.04	68	14.2	1.015	68	50.9	1.098	68	39.4	0.954	68	66	1.094	66	75.9	1.009	64	69.9	1.009	67	15.2	1.058	67	15.2	1.153	67	36.4	0.998	67	19.8	1.115	67	43.4	1.106
P22314	Ubiquitin-like modifier-activating enzyme 1 OS=Homo sapiens GN=UBA1 PE=1 SV=3 - [UBA1_HUMAN]	0.8223	12	56	94	943	1.05	117	18.5	1.091	117	14	0.632	112	63.4	1.094	117	14.4	0.531	110	93.7	0.577	113	74.9	0.616	98	85.7	0.58	98	108.5	0.58	98	83.1	1.054	127	18.4	1.119	127	14.2	0.655	121	63.7	1.038	126	19.8	0.611	117	81.3	0.676
P36578	60S ribosomal protein L4 OS=Homo sapiens GN=RPL4 PE=1 SV=5 - [RL4_HUMAN]	0.9204	10	56	93	1111	1.03	140	16.6	1.059	140	12.1	0.883	136	52.6	1.017	140	15.9	0.916	134	60.2	0.955	135	42.9	0.861	133	68.2	0.851	127	76.2	0.886	134	71.1	1.045	135	17.7	1.076	135	15.7	0.825	130	49.9	1.018	135	18.6	0.911	131	64.8	0.911
P50990	T-complex protein 1 subunit theta OS=Homo sapiens GN=CCT8 PE=1 SV=4 - [TCPQ_HUMAN]	0.9161	7	56	77	970	1.016	134	20	1.098	134	11.7	0.553	130	51.1	1.056	134	19.1	0.515	127	69.3	0.55	129	59	0.491	124	79.2	0.541	119	71.9	0.494	120	76.1	1.025	120	19.8	1.129	120	12.5	0.559	116	55.7	1.046	120	15.8	0.498	113	68.5	0.577
B9A067	MICOS complex subunit MIC60 OS=Homo sapiens GN=IMMT PE=1 SV=2 - [B9A067_HUMAN]	0.8678	23	55	86	574	0.99	65	19.7	0.977	65	16.3	0.844	64	54.1	1.014	65	18.1	0.658	63	77.5	0.717	64	47.7	0.64	60	81.8	0.677	61	85.4	0.626	57	125.6	0.979	69	20.9	0.991	69	16.5	0.764	69	37.4	1.042	69	15.2	0.711	66	59.4	0.716
O76021	Ribosomal L1 domain-containing protein 1 OS=Homo sapiens GN=RSL1D1 PE=1 SV=3 - [RL1D1_HUMAN]	0.9469	10	55	92	663	0.618	97	50.2	0.607	95	46.6	1.979	99	61.4	0.627	95	58.7	2.696	99	64.5	2.739	99	70.6	3.386	97	85.5	2.872	95	80.9	3.172	96	80.6	0.684	101	54.8	0.597	99	53.5	1.929	103	52.8	0.603	97	43.6	2.666	102	64.4	2.319
P23246	Splicing factor, proline- and glutamine-rich OS=Homo sapiens GN=SFPQ PE=1 SV=2 - [SFPQ_HUMAN]	0.7539	7	55	96	1500	0.782	180	37.4	0.72	178	40.5	2.641	187	62.4	0.78	181	33.6	2.965	186	74.8	2.504	187	69.8	2.989	186	87.7	2.838	184	90.6	2.87	185	88.5	0.757	189	37	0.737	184	39.8	2.589	191	71.7	0.756	186	43.7	2.883	192	71.6	2.501
P26640	Valine--tRNA ligase OS=Homo sapiens GN=VARS PE=1 SV=4 - [SYVC_HUMAN]	0.6883	9	55	93	548	1.088	73	14.5	1.092	73	19.2	0.629	71	47.9	1.079	73	15.5	0.653	68	66.8	0.688	71	51.5	0.702	66	84	0.762	63	102.3	0.751	64	108.1	1.111	73	16.8	1.109	73	15.8	0.659	70	66.9	1.061	73	14.3	0.658	66	73.7	0.699
A8K8N7	Phosphoribosylformylglycinamidine synthase (FGAR amidotransferase), isoform CRA_b OS=Homo sapiens GN=PFAS PE=2 SV=1 - [A8K8N7_HUMAN]	0.7309	15	55	79	662	1.09	84	20.9	1.113	84	14.9	0.649	81	61.4	1.095	84	21.1	0.574	76	97.2	0.653	78	65.8	0.716	73	72.8	0.671	68	70.4	0.731	66	91.5	1.061	82	21.2	1.089	82	12.3	0.665	77	53.6	1.064	82	17.5	0.668	73	62.7	0.673
A0A087WUT6	Eukaryotic translation initiation factor 5B OS=Homo sapiens GN=EIF5B PE=1 SV=1 - [A0A087WUT6_HUMAN]	0.7836	7	55	129	520	0.939	60	19.7	0.946	60	13.3	1.047	60	30.5	0.924	60	17.6	1.164	60	37.1	1.09	60	25.1	1.197	60	49	1.09	59	43	1.068	60	61	0.953	53	17.4	0.956	53	9.6	1.035	53	36.9	0.901	53	19.4	1.157	53	46.7	1.066
V9HW84	Epididymis secretory sperm binding protein Li 124m OS=Homo sapiens GN=HEL-S-124m PE=2 SV=1 - [V9HW84_HUMAN]	0.8498	11	55	93	1397	1.02	188	17	1.022	189	12.1	0.779	186	42.8	1.039	189	20.3	0.608	182	67.8	0.618	187	50.9	0.619	177	83.8	0.612	174	87.6	0.625	179	89	0.992	180	19	1.008	179	12.6	0.77	180	41.5	1.002	181	19.5	0.64	175	69.1	0.643
A0A024R7U6	DNA helicase OS=Homo sapiens GN=MCM4 PE=3 SV=1 - [A0A024R7U6_HUMAN]	0.8378	15	55	93	868	0.962	100	20.9	0.908	100	20.9	1.639	99	40.3	0.96	100	21.3	1.61	98	45.8	1.588	98	35.5	1.257	95	78.9	1.307	95	73.9	1.2	94	86.4	0.957	105	18.3	0.94	105	19.3	1.535	105	40.7	0.973	105	21.8	1.657	102	50.1	1.436
O43290	U4/U6.U5 tri-snRNP-associated protein 1 OS=Homo sapiens GN=SART1 PE=1 SV=1 - [SNUT1_HUMAN]	0.8325	13	54	93	494	0.811	60	25.8	0.729	59	31.4	2.536	60	42.5	0.78	60	36	2.766	60	53.1	2.647	60	45.4	2.598	59	54.9	2.549	59	46.8	2.784	59	56.2	0.863	73	22.4	0.809	73	37.6	2.238	74	52.9	0.88	73	27.1	2.615	74	65.2	2.168
O94906	Pre-mRNA-processing factor 6 OS=Homo sapiens GN=PRPF6 PE=1 SV=1 - [PRP6_HUMAN]	0.8533	2	54	116	599	0.86	62	27.2	0.753	61	35.5	1.9	62	33.2	0.805	61	28.7	2.37	62	31.6	2.161	62	28.9	2.072	62	43.4	1.744	60	44.9	1.8	61	48.9	0.829	70	29.2	0.807	69	28.4	1.858	70	40.6	0.853	69	27.7	2.248	70	45.2	2.138
P52948-5	Isoform 5 of Nuclear pore complex protein Nup98-Nup96 OS=Homo sapiens GN=NUP98 - [NUP98_HUMAN]	0.495	14	54	109	634	0.899	78	21.8	0.846	78	24.1	1.861	78	42.4	0.859	78	22.1	2.042	78	45.4	1.856	78	45.8	1.881	78	60.9	1.637	78	58.4	1.736	78	61.6	0.885	70	22	0.868	70	25.2	1.791	72	51.2	0.891	70	24.9	2.234	72	55.8	1.904
Q93009	Ubiquitin carboxyl-terminal hydrolase 7 OS=Homo sapiens GN=USP7 PE=1 SV=2 - [UBP7_HUMAN]	0.8312	17	54	110	607	0.903	66	22.8	0.901	66	21.4	1.508	67	44.2	0.904	66	25.6	1.717	65	58.8	1.54	64	34.7	1.444	62	65.1	1.469	63	60.4	1.428	59	63.8	0.915	67	27.7	0.924	65	19.7	1.355	67	45.4	0.928	67	30.1	1.356	65	58.2	1.394
Q9NW13	RNA-binding protein 28 OS=Homo sapiens GN=RBM28 PE=1 SV=3 - [RBM28_HUMAN]	0.834	41	54	108	664	0.834	57	19.1	0.73	56	29.9	2.42	58	52.6	0.796	57	31.5	2.904	57	54.4	2.299	58	51.8	4.195	58	91.4	4.46	58	85.3	3.933	58	87.9	0.804	63	18.9	0.779	61	27.4	2.309	64	50.3	0.832	63	23	2.463	64	68.6	2.232
Q9GZV0	cDNA FLJ12454 fis, clone NT2RM1000555, highly similar to UNR PROTEIN OS=Homo sapiens PE=2 SV=1 - [Q9GZV0_HUMAN]	0.8983	13	54	93	624	0.993	80	20.2	1.121	80	13.5	0.852	77	53.4	0.976	80	23	0.797	77	49.5	0.82	77	49.9	0.675	70	84.7	0.721	67	87.7	0.679	67	103.2	0.984	82	24	1.09	81	15.3	0.897	80	46.8	1.005	81	25.4	0.797	81	59.8	0.843
P25205-2	Isoform 2 of DNA replication licensing factor MCM3 OS=Homo sapiens GN=MCM3 - [MCM3_HUMAN]	0.7726	10	54	87	698	0.962	87	19.8	0.928	88	17.2	1.369	87	43	0.977	87	21.6	1.522	88	47.3	1.342	88	44.9	1.154	85	59.6	1.207	82	66.8	1.154	83	60	0.961	84	23.8	0.961	84	16.4	1.44	84	41	0.963	84	22.9	1.557	84	46.3	1.415
V9HW65	Annexin OS=Homo sapiens GN=HEL-S-270 PE=2 SV=1 - [V9HW65_HUMAN]	0.9558	28	54	69	1261	0.979	185	18.5	1.073	185	13.1	0.669	176	50.8	0.965	183	16.9	0.624	166	65.3	0.653	176	56.7	0.54	158	88.8	0.54	159	111.6	0.519	154	98.8	0.973	169	20.4	1.059	171	12.7	0.662	165	53.1	0.965	170	20.5	0.594	158	81.2	0.618
P49736	DNA replication licensing factor MCM2 OS=Homo sapiens GN=MCM2 PE=1 SV=4 - [MCM2_HUMAN]	0.8064	10	53	91	705	0.939	83	21.9	0.941	82	18	1.346	83	36.8	0.943	82	19.5	1.358	81	41.6	1.39	82	42	1.084	79	40.4	0.934	77	48.5	0.864	79	51.9	0.959	89	26.8	0.937	88	21.6	1.365	87	42.2	0.977	89	28.1	1.495	88	45.5	1.4
Q02880	DNA topoisomerase 2-beta OS=Homo sapiens GN=TOP2B PE=1 SV=3 - [TOP2B_HUMAN]	0.7417	15	53	169	785	0.818	49	29.2	0.751	49	46.1	1.672	50	48.1	0.84	49	40.3	2.077	50	53.3	1.906	50	44.4	1.773	50	78.9	1.716	48	70.2	1.683	49	69.6	0.809	55	23	0.793	55	28.5	1.689	55	55.9	0.803	55	31.7	2.361	55	55.3	2.182
Q12888	Tumor suppressor p53-binding protein 1 OS=Homo sapiens GN=TP53BP1 PE=1 SV=2 - [TP53B_HUMAN]	0.6729	12	53	121	584	0.851	55	27.7	0.759	53	38	1.986	55	50.2	0.833	54	30.4	2.266	55	60.2	2.022	55	44.2	2.281	55	90.1	2.039	54	89.5	1.995	55	70.5	0.766	60	29.6	0.772	59	29.9	2.092	60	55.9	0.79	60	33.4	2.298	60	71.1	1.947
Q13263	Transcription intermediary factor 1-beta OS=Homo sapiens GN=TRIM28 PE=1 SV=5 - [TIF1B_HUMAN]	0.7581	7	53	84	854	0.957	116	21.9	0.974	116	17.5	1.225	116	38.9	0.955	115	19.8	1.199	114	45.3	1.183	116	37	1.141	111	56.4	1.142	110	83.6	1.157	113	62.7	0.967	121	20.6	1.001	122	14.6	1.263	120	56.6	0.962	122	19.8	1.317	119	55.4	1.229
Q14684	Ribosomal RNA processing protein 1 homolog B OS=Homo sapiens GN=RRP1B PE=1 SV=3 - [RRP1B_HUMAN]	0.814	3	53	83	460	0.766	66	21.7	0.723	64	29	2.003	66	39.6	0.767	64	38.3	2.673	66	55	2.465	66	45.8	3.085	66	82.5	2.771	66	46.6	3.392	66	82.6	0.831	62	30.9	0.745	62	34.5	1.898	62	36.8	0.862	60	30.7	2.627	62	49.3	2.476
Q14966	Zinc finger protein 638 OS=Homo sapiens GN=ZNF638 PE=1 SV=2 - [ZN638_HUMAN]	0.7007	20	53	180	629	0.823	52	20.7	0.804	52	29.3	2.285	52	51.1	0.838	52	21.3	2.597	52	53.2	2.25	52	48.2	2.234	52	72.5	2.238	52	61.9	2.224	52	58.5	0.808	54	21.2	0.766	54	29	2.311	54	48.4	0.821	54	31	2.405	54	54.5	2.23
Q15233	Non-POU domain-containing octamer-binding protein OS=Homo sapiens GN=NONO PE=1 SV=4 - [NONO_HUMAN]	0.8662	9	53	80	2168	0.904	280	30	0.796	278	36.2	2.485	284	57.5	0.854	281	35.3	2.697	283	67.8	2.231	285	59.3	2.667	283	83.3	2.645	281	85.6	2.665	281	76.6	0.867	278	27.8	0.787	278	34.6	2.542	281	61.5	0.857	276	35.9	2.77	281	59.6	2.302
O00410-3	Isoform 3 of Importin-5 OS=Homo sapiens GN=IPO5 - [IPO5_HUMAN]	0.722	23	52	81	729	1.079	84	24.3	1.126	83	13	0.596	80	47.8	1.057	84	17.5	0.514	74	59.1	0.595	78	40.5	0.571	68	91.8	0.57	68	94.9	0.581	66	70	1.093	73	24.2	1.133	73	16.6	0.502	67	66.3	1.069	73	20	0.482	62	97.8	0.518
P25705	ATP synthase subunit alpha, mitochondrial OS=Homo sapiens GN=ATP5A1 PE=1 SV=1 - [ATPA_HUMAN]	0.8861	10	52	78	851	0.892	116	22.4	0.999	115	13.6	0.733	112	50.4	0.928	116	20.7	0.579	107	81.5	0.609	111	67.9	0.552	103	99.4	0.543	103	109	0.503	102	131.2	0.942	109	28.1	0.968	109	18	0.654	104	54.2	0.924	109	23	0.525	105	87.2	0.569
Q01780	Exosome component 10 OS=Homo sapiens GN=EXOSC10 PE=1 SV=2 - [EXOSX_HUMAN]	0.8418	6	52	102	543	0.917	62	23.2	0.875	60	26.8	1.908	61	45.2	0.939	61	23.4	2.091	62	56.4	2.165	61	40.6	3.897	61	68.1	3.925	62	71.5	3.725	61	58.6	0.917	69	23.9	0.873	70	25.8	1.825	70	56.8	0.925	70	21.1	2.133	69	70.2	1.929
Q15397	Pumilio homolog 3 OS=Homo sapiens GN=PUM3 PE=1 SV=3 - [PUM3_HUMAN]	0.9028	15	52	109	481	0.927	58	25.6	0.752	57	45	2.045	57	35.9	0.871	56	24.5	2.713	57	51.1	2.236	57	45.2	3.696	58	81.1	3.404	58	97.9	3.454	58	73.1	0.862	61	35.9	0.801	59	25	1.817	61	51.7	0.843	61	30.5	2.316	61	60.2	1.986
Q16531	DNA damage-binding protein 1 OS=Homo sapiens GN=DDB1 PE=1 SV=1 - [DDB1_HUMAN]	0.6482	11	52	84	459	0.932	71	28.7	0.933	71	17.9	0.957	70	40.8	0.92	71	32.4	1.091	69	38.5	1.202	70	35.3	0.85	66	52.5	0.79	64	69.3	0.757	64	52.1	0.855	61	24.7	0.911	61	14.8	0.84	58	38.1	0.907	61	25.4	1.085	59	34.4	1.021
Q92598	Heat shock protein 105 kDa OS=Homo sapiens GN=HSPH1 PE=1 SV=1 - [HS105_HUMAN]	0.8473	12	52	106	793	1.073	81	16.8	1.133	81	14.4	0.534	79	43.2	1.104	81	16.3	0.484	78	75.3	0.53	79	45.3	0.489	77	75.2	0.525	74	81.9	0.467	75	80.7	1.078	81	21.6	1.152	81	12.6	0.567	79	48.6	1.106	81	15.7	0.483	78	70.6	0.562
Q9BUQ8	Probable ATP-dependent RNA helicase DDX23 OS=Homo sapiens GN=DDX23 PE=1 SV=3 - [DDX23_HUMAN]	0.7634	8	52	91	620	0.816	67	26.7	0.791	65	28	2.353	67	46.6	0.819	66	32.5	2.312	67	56.2	2.254	67	47.8	2.265	66	58.2	1.984	65	66.7	2.08	65	50.8	0.824	81	25.6	0.795	79	30.2	2.233	81	45.7	0.806	81	30.4	2.414	81	40.8	2.273
P05787-2	Isoform 2 of Keratin, type II cytoskeletal 8 OS=Homo sapiens GN=KRT8 - [K2C8_HUMAN]	0.9902	17	51	94	1433	0.99	177	21.9	1.1	176	13.5	0.683	169	82	1.029	177	25	0.655	159	98.7	0.638	165	74.6	0.555	149	130	0.582	144	108.2	0.55	145	116.5	0.99	167	25.1	1.135	167	14.4	0.654	158	69.3	1.022	168	24.3	0.582	150	73.7	0.63
P27708	CAD protein OS=Homo sapiens GN=CAD PE=1 SV=3 - [PYR1_HUMAN]	0.6054	11	51	118	503	1.113	46	18.1	1.004	46	16.5	0.691	44	51.7	1.023	46	13.8	0.543	42	100.1	0.65	44	55	0.658	41	78.3	0.601	43	125.2	0.703	42	103.7	1.109	53	20	1.107	53	16.8	0.704	52	65.8	1.057	53	16.9	0.588	48	93.1	0.686
P29401	Transketolase OS=Homo sapiens GN=TKT PE=1 SV=3 - [TKT_HUMAN]	0.9342	22	51	69	1435	1.092	189	20.9	1.127	191	15.5	0.627	181	82.2	1.099	189	19.5	0.585	173	105.7	0.622	175	87.8	0.623	167	122.4	0.63	154	122.2	0.596	160	106.9	1.084	179	17.4	1.121	180	15.8	0.552	176	85.9	1.076	180	15.6	0.506	164	115.3	0.543
P31939	Bifunctional purine biosynthesis protein PURH OS=Homo sapiens GN=ATIC PE=1 SV=3 - [PUR9_HUMAN]	0.9595	7	51	73	785	1.068	111	19.7	1.153	110	14.5	0.601	102	74.3	1.079	110	18.4	0.538	96	108.6	0.574	101	88.9	0.587	90	101.2	0.687	89	92.7	0.68	92	84.3	1.036	106	22	1.11	105	11.5	0.584	99	82.7	1.017	106	17.7	0.592	90	98.1	0.539
P39023	60S ribosomal protein L3 OS=Homo sapiens GN=RPL3 PE=1 SV=2 - [RL3_HUMAN]	0.9429	15	51	85	1093	1.07	130	22.6	1.094	130	14.8	0.939	130	50	1.086	130	21.9	1.058	129	59.2	1.047	130	39.5	0.969	128	70.6	0.834	127	74.7	0.947	127	65.9	1.081	125	24.7	1.099	125	13.5	0.901	124	38.4	1.074	125	23.8	0.976	122	49.3	1.039
Q12788	Transducin beta-like protein 3 OS=Homo sapiens GN=TBL3 PE=1 SV=2 - [TBL3_HUMAN]	0.8465	5	51	75	555	0.824	73	34.2	0.843	71	34.5	1.504	73	46.6	0.861	69	26.6	2.089	72	54.4	1.922	74	45	2.958	71	73.4	2.528	70	72.7	2.611	71	62.9	0.867	63	25.1	0.897	61	22.2	1.482	63	36.1	0.839	61	20.8	2.058	60	47.3	1.66
Q14008	Cytoskeleton-associated protein 5 OS=Homo sapiens GN=CKAP5 PE=1 SV=3 - [CKAP5_HUMAN]	0.7239	10	51	158	590	1.073	48	18	0.956	47	16.5	0.867	48	36.5	0.989	48	16.9	1.018	48	65.1	1.142	48	49.1	0.885	47	76.3	0.906	47	92.9	0.857	46	74.6	1.061	46	18.7	0.961	46	13.7	0.927	46	58.8	0.952	46	22.1	1.138	44	54.5	1.187
Q59G75	Isoleucyl-tRNA synthetase, cytoplasmic variant (Fragment) OS=Homo sapiens PE=2 SV=1 - [Q59G75_HUMAN]	0.6818	12	51	90	464	1.112	61	16.7	1.142	61	12.2	0.542	60	69.3	1.091	61	14.1	0.542	56	89.9	0.55	60	70.7	0.569	48	97.4	0.546	50	70.9	0.467	49	131.9	1.068	57	20.6	1.1	57	12.6	0.61	54	58.3	1.027	57	16.5	0.614	52	96.7	0.681
J3KN16	Proteasome-associated protein ECM29 homolog OS=Homo sapiens GN=KIAA0368 PE=1 SV=1 - [J3KN16_HUMAN]	0.6505	7	51	154	586	1.103	42	20.1	0.996	42	14.4	0.741	40	48.5	1.058	42	19.4	0.735	41	65.7	0.761	41	36.1	0.759	38	60.7	0.808	34	64.3	0.725	36	62.9	1.109	40	23	1.066	39	11.8	0.711	34	62.7	1.081	40	24.8	0.698	34	82	0.708
A0A024R8B6	Nucleoporin 214kDa, isoform CRA_b OS=Homo sapiens GN=NUP214 PE=4 SV=1 - [A0A024R8B6_HUMAN]	0.4969	17	51	96	473	0.9	54	19.8	0.862	55	22.9	1.799	54	49	0.91	54	23.2	1.851	54	60.6	1.809	55	60.3	1.472	54	71	1.371	54	72.1	1.378	55	50.3	0.873	52	20	0.871	52	21.2	1.74	52	51.4	0.819	52	25.8	2.013	51	64.5	1.826
E7EVA0	Microtubule-associated protein OS=Homo sapiens GN=MAP4 PE=1 SV=1 - [E7EVA0_HUMAN]	0.7579	23	50	202	1028	1.039	58	20.7	1.175	58	13.2	0.662	58	66.3	1.081	58	16.2	0.584	54	86.6	0.645	56	59.3	0.562	54	100.1	0.606	53	87.3	0.597	51	58.6	1.027	63	20.2	1.165	63	10.7	0.682	61	42.9	1.016	63	18.7	0.627	60	55	0.633
P78371	T-complex protein 1 subunit beta OS=Homo sapiens GN=CCT2 PE=1 SV=4 - [TCPB_HUMAN]	0.9551	6	50	66	1186	1.053	167	19.6	1.102	165	16	0.679	160	78.4	1.101	165	21.4	0.63	149	104.4	0.636	154	79.3	0.606	139	100.5	0.601	137	125.6	0.554	140	115.3	1.083	167	20.4	1.12	168	18.7	0.628	158	80.5	1.094	168	19.9	0.552	153	102.9	0.589
Q07065	Cytoskeleton-associated protein 4 OS=Homo sapiens GN=CKAP4 PE=1 SV=2 - [CKAP4_HUMAN]	0.8621	10	50	85	581	1.016	71	20	0.961	71	14.9	0.929	69	55.5	1.056	71	20.3	0.832	69	82.3	0.884	69	53	0.765	67	86	0.79	66	85.4	0.87	65	98.1	1.016	74	20	0.976	74	14.9	0.895	71	40.4	1.022	74	19.3	0.871	73	59.2	0.878
Q92900-2	Isoform 2 of Regulator of nonsense transcripts 1 OS=Homo sapiens GN=UPF1 - [RENT1_HUMAN]	0.6673	12	50	89	407	1.041	43	19.8	1.044	43	14	0.763	42	49.7	1.06	43	22	0.767	39	83.5	0.78	42	60.7	0.642	40	62.1	0.664	37	59.8	0.669	36	69	1.041	49	15.5	1.066	49	15.6	0.824	46	36.5	1.068	49	15.4	0.758	47	76.4	0.769
Q9Y2W1	Thyroid hormone receptor-associated protein 3 OS=Homo sapiens GN=THRAP3 PE=1 SV=2 - [TR150_HUMAN]	0.7539	5	50	145	673	0.719	62	40.4	0.645	61	35.5	2.953	63	62	0.676	60	35.2	3.187	63	70.3	2.756	62	64.5	3.127	63	73.9	2.753	62	57.9	2.974	63	67.9	0.692	67	40.4	0.664	64	56	3.12	68	52.5	0.773	65	42.7	3.257	68	55.3	2.956
P49756	RNA-binding protein 25 OS=Homo sapiens GN=RBM25 PE=1 SV=3 - [RBM25_HUMAN]	0.5528	9	49	82	492	0.823	60	24.2	0.737	59	41.5	2.693	60	76.2	0.794	59	29.4	2.939	60	66.8	2.715	60	72.9	2.51	60	69.9	2.568	59	82	2.379	60	99.5	0.785	57	20.7	0.685	57	54.2	3.008	57	55.5	0.765	57	22.3	3.077	56	54	2.977
P49915	GMP synthase [glutamine-hydrolyzing] OS=Homo sapiens GN=GMPS PE=1 SV=1 - [GUAA_HUMAN]	0.8701	3	49	77	720	1.037	100	16.2	1.043	99	14.9	0.934	99	55	1.017	100	21.3	0.821	95	75.3	0.863	98	55.8	0.886	87	100.1	0.823	80	95.5	0.742	87	91	1.011	91	20.9	1.083	92	14.3	0.856	89	44.3	1.02	91	21.7	0.81	86	66.5	0.786
P53621	Coatomer subunit alpha OS=Homo sapiens GN=COPA PE=1 SV=2 - [COPA_HUMAN]	0.7876	5	49	108	447	1.062	53	18.7	0.869	53	14.7	0.78	52	46.8	1.002	53	15.9	0.79	52	60	0.863	53	32.2	0.753	50	71.8	0.723	50	101.5	0.814	49	71.9	1.09	54	22	0.896	54	18.8	0.761	54	45	0.981	54	15.8	0.79	52	58.2	0.819
Q9ULW0	Targeting protein for Xklp2 OS=Homo sapiens GN=TPX2 PE=1 SV=2 - [TPX2_HUMAN]	0.8394	4	49	94	428	0.906	47	27.5	0.821	45	31.7	2.265	48	43.4	0.875	48	29.6	2.499	48	45.3	2.259	48	39.5	2.768	48	62.9	2.569	48	58.4	2.777	48	69.1	0.834	54	34.4	0.823	52	28.7	2.285	56	43.8	0.871	56	31	2.581	56	57	2.291
A8K9K6	cDNA FLJ76962, highly similar to Homo sapiens nucleolar protein 5A (56kDa with KKE/D repeat) (NOL5A), mRNA OS=Homo sapiens PE=2 SV=1 - [A8K9K6_HUMAN]	0.8636	7	49	71	1014	0.86	130	29.7	0.833	130	35.4	1.916	131	51.3	0.86	126	31.4	2.357	132	67.2	1.896	131	55.8	3.781	132	85.9	3.322	130	95.5	2.993	130	84.1	0.905	121	31.6	0.83	117	32.2	2	123	53.5	0.878	115	32.2	2.192	121	58.4	2.114
B3KQT9	Protein disulfide-isomerase OS=Homo sapiens PE=2 SV=1 - [B3KQT9_HUMAN]	0.9292	7	48	71	803	1.016	102	20.1	1.055	102	13.5	0.882	101	45	1.034	101	15.6	0.736	99	58.5	0.765	99	51.8	0.652	93	83.2	0.677	92	86.5	0.616	93	82	1.012	95	17.9	1.041	95	16	0.941	91	48.3	1.08	95	18	0.815	91	69	0.771
O15226-2	Isoform 2 of NF-kappa-B-repressing factor OS=Homo sapiens GN=NKRF - [NKRF_HUMAN]	0.7716	11	48	90	474	0.966	48	15.9	0.969	48	20.7	1.85	48	41.6	0.949	48	24.5	2.192	48	54.5	1.879	48	52	3.169	48	67.1	3.222	48	73.4	3.126	48	68.2	0.913	59	18.5	0.916	59	21.1	1.921	59	36.3	0.91	59	23.9	2.355	59	51.5	1.956
O75116	Rho-associated protein kinase 2 OS=Homo sapiens GN=ROCK2 PE=1 SV=4 - [ROCK2_HUMAN]	0.7536	6	48	171	643	0.987	41	17.3	1.07	42	9.8	0.704	41	38.4	1.049	42	19.4	0.638	41	42.9	0.72	41	40.2	0.578	39	59.1	0.61	40	70.8	0.589	41	79.1	0.992	44	21.2	1.067	44	11.8	0.742	43	47.1	1.029	44	16.7	0.685	43	54.5	0.694
P07237	Protein disulfide-isomerase OS=Homo sapiens GN=P4HB PE=1 SV=3 - [PDIA1_HUMAN]	0.9154	19	48	62	620	1.007	101	19.9	1.072	101	10.2	0.699	98	47.9	1.038	100	21.6	0.539	91	74.4	0.557	96	63	0.497	87	66.3	0.462	86	79.5	0.496	85	86.3	1.002	96	21.4	1.103	96	13.2	0.697	95	65.5	1.066	96	19.9	0.517	90	87.3	0.495
P11717	Cation-independent mannose-6-phosphate receptor OS=Homo sapiens GN=IGF2R PE=1 SV=3 - [MPRI_HUMAN]	0.6275	5	48	152	477	1.045	31	15.6	0.875	31	16.3	0.822	30	43.6	1.03	31	17.2	0.726	30	47.1	0.764	30	43.9	0.665	30	68.9	0.657	28	72.5	0.656	30	73.1	1.049	33	17.7	0.924	33	15	0.722	33	39.3	1.002	33	21.9	0.772	32	45.8	0.717
P33993	DNA replication licensing factor MCM7 OS=Homo sapiens GN=MCM7 PE=1 SV=4 - [MCM7_HUMAN]	0.9096	10	48	88	615	0.892	81	24.9	0.887	81	21.9	1.407	80	39	0.905	80	22.2	1.49	80	51.5	1.481	80	43	1.332	78	66.9	1.272	75	88.3	1.238	75	81.1	0.891	76	21	0.915	76	16.9	1.463	75	39.9	0.93	76	23.6	1.537	75	50.1	1.464
Q9Y520-5	Isoform 5 of Protein PRRC2C OS=Homo sapiens GN=PRRC2C - [PRC2C_HUMAN]	0.5384	17	48	195	872	1.077	51	19.7	1.115	51	13.6	0.811	51	51.2	1.049	51	13	0.76	51	58.5	0.736	51	44.1	0.897	48	68.2	0.914	49	61	0.858	47	72.3	1.021	41	17.3	1.116	41	13.3	0.837	41	47.2	1.064	41	12.7	0.839	40	55.4	0.829
Q9BU08	Putative uncharacterized protein (Fragment) OS=Homo sapiens PE=2 SV=1 - [Q9BU08_HUMAN]	0.9184	17	48	76	1353	1.1	137	24.8	1.149	136	15.9	0.633	128	55.5	1.081	136	17.3	0.558	121	61.6	0.616	127	57.2	0.525	107	75.6	0.572	106	82.3	0.55	107	92.6	1.103	143	20.4	1.168	143	14	0.683	136	49.1	1.12	143	20.2	0.593	128	73.3	0.634
H3BQK9	Microtubule-actin cross-linking factor 1, isoforms 1/2/3/5 OS=Homo sapiens GN=MACF1 PE=1 SV=1 - [H3BQK9_HUMAN]	0.6529	31	47	571	1445	1.146	27	21.6	1.127	27	15.1	0.818	26	31.5	1.076	26	16.1	0.69	25	45.7	0.767	26	27.4	0.639	26	42.2	0.696	24	59.9	0.724	23	44.8	1.142	21	16.5	1.058	21	11.7	0.923	21	43	1.152	21	30	0.816	21	41.7	0.865
O43143	Pre-mRNA-splicing factor ATP-dependent RNA helicase DHX15 OS=Homo sapiens GN=DHX15 PE=1 SV=2 - [DHX15_HUMAN]	0.7358	2	47	81	708	0.926	86	26.1	0.886	85	26.6	1.37	86	41.6	0.9	86	23.4	1.491	85	51.6	1.318	86	34.8	1.436	82	62.4	1.57	81	66.5	1.395	82	63.1	0.967	87	26.4	0.899	87	23.2	1.426	88	44.5	0.915	88	23.4	1.572	88	58.6	1.332
P05783	Keratin, type I cytoskeletal 18 OS=Homo sapiens GN=KRT18 PE=1 SV=2 - [K1C18_HUMAN]	0.9605	16	47	73	1625	1.056	175	19.7	1.102	175	13.3	0.754	173	61.7	1.082	175	18.3	0.683	171	83.1	0.734	173	61.8	0.603	160	87.3	0.611	162	113.5	0.606	161	94.2	1.037	165	21.2	1.1	165	16.2	0.804	163	60.8	1.073	165	21.9	0.663	158	91	0.738
P07900-2	Isoform 2 of Heat shock protein HSP 90-alpha OS=Homo sapiens GN=HSP90AA1 - [HS90A_HUMAN]	0.7693	13	47	118	3086	1.012	214	23.7	1.135	214	14.3	0.472	200	81.7	1.051	213	23.6	0.385	188	118.3	0.467	204	85.3	0.393	178	104.3	0.366	165	127.5	0.409	172	135.5	1.046	205	21.1	1.128	206	15.7	0.487	195	65.5	1.079	204	21.2	0.427	188	97.9	0.491
P35573	Glycogen debranching enzyme OS=Homo sapiens GN=AGL PE=1 SV=3 - [GDE_HUMAN]	0.671	6	47	112	415	1.124	42	15.3	1.111	42	9.9	0.706	41	50.9	1.084	42	19.4	0.671	40	61	0.766	41	47.5	0.584	39	58.7	0.62	38	62.3	0.545	38	48.7	1.092	39	15.1	1.127	39	14.8	0.597	37	58.2	1.113	39	12.6	0.62	37	71.3	0.635
Q15459	Splicing factor 3A subunit 1 OS=Homo sapiens GN=SF3A1 PE=1 SV=1 - [SF3A1_HUMAN]	0.7074	18	47	74	528	0.869	68	21.9	0.867	68	22.5	1.999	68	56.2	0.871	67	21	2.017	67	62.6	1.987	68	58.4	1.995	67	64.5	1.957	66	57.9	1.934	66	70.2	0.852	71	36.4	0.822	71	30.3	1.799	71	46.8	0.808	71	23.2	1.958	71	44.1	1.749
Q5QJE6	Deoxynucleotidyltransferase terminal-interacting protein 2 OS=Homo sapiens GN=DNTTIP2 PE=1 SV=2 - [TDIF2_HUMAN]	0.8228	4	47	79	743	0.886	88	29.8	0.881	88	29.2	2.303	87	69.1	0.935	87	28.3	2.805	86	93.1	2.323	86	71.9	4.287	87	106.9	4.4	86	101.4	4.631	87	123.6	0.886	82	36.1	0.84	81	33.3	2.383	83	53.8	0.84	82	49.6	2.602	82	85	2.349
Q92499	ATP-dependent RNA helicase DDX1 OS=Homo sapiens GN=DDX1 PE=1 SV=2 - [DDX1_HUMAN]	0.7973	6	47	80	486	1.013	53	28	1.037	53	16.3	1.129	52	45.6	1	53	20.9	1.184	53	66.3	1.077	53	44.8	1.138	50	61.2	1.037	49	75.4	0.926	49	80.9	1.009	58	20.3	1.018	58	13.2	1.148	57	51.5	1.063	58	20.8	1.087	58	62.4	1.166
Q92945	Far upstream element-binding protein 2 OS=Homo sapiens GN=KHSRP PE=1 SV=4 - [FUBP2_HUMAN]	0.7511	10	47	79	984	0.918	102	18.9	0.864	101	20.9	1.902	102	52.4	0.884	101	22.8	1.908	102	53	1.645	102	58.5	1.179	100	79.9	1.094	99	83.3	1.133	99	81.2	0.952	107	24	0.891	107	20.4	1.738	106	59.1	0.921	107	29.3	1.836	107	48.8	1.569
Q9H501	ESF1 homolog OS=Homo sapiens GN=ESF1 PE=1 SV=1 - [ESF1_HUMAN]	0.7074	7	47	102	478	0.867	56	23.8	0.862	54	20.2	2.301	56	55.6	0.862	55	30.9	2.801	56	68.7	2.398	56	45.7	4.837	56	61.4	5.573	56	58.5	5.503	56	60.1	0.906	52	25.9	0.836	48	21.3	2.176	54	54.5	0.874	49	32.8	2.703	54	56.2	2.142
Q9P275	Ubiquitin carboxyl-terminal hydrolase 36 OS=Homo sapiens GN=USP36 PE=1 SV=3 - [UBP36_HUMAN]	0.8376	19	47	114	618	0.875	53	27.6	0.806	53	17.6	1.765	54	41.4	0.841	53	26.4	2.312	54	58.9	2.026	54	43	2.889	54	66.4	2.499	54	72.7	3.092	54	91	0.916	58	32	0.823	58	20	1.876	59	29.3	0.935	58	34.8	2.25	59	38.3	2.032
Q9UNX4	WD repeat-containing protein 3 OS=Homo sapiens GN=WDR3 PE=1 SV=1 - [WDR3_HUMAN]	0.7381	4	47	90	489	0.872	66	30.3	0.808	66	39.2	1.536	68	45	0.834	67	31.1	2.138	67	58.2	2.157	69	52.4	2.57	67	64.6	2.019	65	57.4	2.318	67	57	0.909	57	32.8	0.794	57	25	1.604	59	45.8	0.845	58	30	2.203	59	56.6	2.108
Q03252	Lamin-B2 OS=Homo sapiens GN=LMNB2 PE=1 SV=4 - [LMNB2_HUMAN]	0.9339	2	47	91	664	0.8	76	29.4	0.779	75	31.2	2.536	76	41.4	0.816	76	29.4	2.671	76	57.8	2.48	76	47.2	2.565	76	60.5	2.339	76	60.8	2.555	76	51.1	0.757	69	30.5	0.772	65	36.6	2.577	69	41.8	0.803	67	27.8	3.177	69	42.9	2.566
H3BLZ8	Probable ATP-dependent RNA helicase DDX17 OS=Homo sapiens GN=DDX17 PE=1 SV=1 - [H3BLZ8_HUMAN]	0.7893	9	46	87	1294	0.846	124	36.2	0.852	124	38.3	2.021	127	61.1	0.843	124	37	2.226	126	71.7	2.122	127	58.3	2.247	125	79.5	2.043	122	78.9	2.019	121	69.4	0.874	120	31.4	0.807	120	39.6	2.161	123	72.8	0.879	120	34.5	2.581	122	74.4	2.09
P33992	DNA replication licensing factor MCM5 OS=Homo sapiens GN=MCM5 PE=1 SV=5 - [MCM5_HUMAN]	0.8706	10	46	83	414	0.938	56	23.8	0.906	56	17.9	1.307	56	28.9	0.952	57	21.6	1.362	56	42.9	1.26	57	44.2	1.005	56	45.7	1.007	55	43.5	1.041	55	44.7	0.966	56	21.2	0.898	55	19.9	1.279	55	28.8	0.931	55	23.4	1.479	56	32.9	1.286
Q14566	DNA replication licensing factor MCM6 OS=Homo sapiens GN=MCM6 PE=1 SV=1 - [MCM6_HUMAN]	0.8392	4	46	96	539	0.912	59	26.2	0.916	58	14.2	1.389	59	45	0.896	59	22.2	1.394	57	37.4	1.461	59	42.9	1.118	51	54.6	1.029	53	65.2	1.031	50	58.8	0.921	63	29.9	0.952	65	15	1.344	64	54.1	0.94	65	29.5	1.284	63	60.1	1.339
Q86XP3	ATP-dependent RNA helicase DDX42 OS=Homo sapiens GN=DDX42 PE=1 SV=1 - [DDX42_HUMAN]	0.9051	13	46	104	568	0.907	62	22	0.881	61	25.3	1.708	64	53.6	0.91	63	23.9	1.976	64	52.4	1.818	63	41.3	1.762	59	54.9	1.885	60	83.4	1.73	61	65.6	0.875	57	19.2	0.82	56	23.1	1.851	55	49.8	0.858	56	22.2	2.065	55	65.1	1.819
Q8WUM4	Programmed cell death 6-interacting protein OS=Homo sapiens GN=PDCD6IP PE=1 SV=1 - [PDC6I_HUMAN]	0.8237	10	46	84	538	1.003	64	16.4	1.117	65	9.7	0.665	63	53.5	1.035	65	17.1	0.572	62	54.6	0.574	63	50.1	0.573	58	84.7	0.519	59	66.2	0.588	60	55.6	1.007	59	19.8	1.108	58	10.7	0.601	56	45.9	1.025	59	16.3	0.547	55	47	0.551
Q8WYP5-2	Isoform 2 of Protein ELYS OS=Homo sapiens GN=AHCTF1 - [ELYS_HUMAN]	0.6319	9	46	155	663	0.88	48	28.1	0.865	48	30.8	1.848	48	56.4	0.9	47	37.5	2.424	48	89.7	2.397	48	70.6	1.934	48	72.5	1.818	45	45	1.866	46	64.7	0.846	47	43.3	0.782	47	40.4	1.891	47	51.3	0.769	46	36.7	2.52	47	68.6	2.406
Q9BXP5-4	Isoform 4 of Serrate RNA effector molecule homolog OS=Homo sapiens GN=SRRT - [SRRT_HUMAN]	0.7095	12	46	101	515	0.831	48	19.8	0.782	48	18	1.954	49	64	0.781	49	19.7	2.294	49	69.7	1.86	49	56.5	1.882	49	104.2	1.744	49	93.7	1.694	49	84.7	0.832	55	26.1	0.778	54	31.4	2.113	54	49.4	0.813	55	33.1	2.24	56	60	2.014
Q9C0C2	182 kDa tankyrase-1-binding protein OS=Homo sapiens GN=TNKS1BP1 PE=1 SV=4 - [TB182_HUMAN]	0.6854	6	46	112	439	1.057	37	15.3	1.081	37	14.2	0.782	36	33.1	1.041	38	11.4	0.651	37	39	0.73	36	35.9	0.717	35	73.8	0.697	35	49.6	0.74	36	59.7	1.08	42	16.3	1.107	42	10.1	0.776	42	35.1	1.076	42	17.4	0.731	42	49.3	0.714
Q9NVP1	ATP-dependent RNA helicase DDX18 OS=Homo sapiens GN=DDX18 PE=1 SV=2 - [DDX18_HUMAN]	0.8284	6	46	75	812	0.837	82	32	0.794	82	32.6	1.902	83	49.6	0.756	78	40	2.431	82	56.7	2.169	81	54.8	2.939	81	64.4	2.676	80	62.8	2.616	82	52.5	0.833	89	27.6	0.773	85	35.5	1.967	91	53.1	0.793	87	44.7	2.345	91	60.7	2.056
Q9UQ80	Proliferation-associated protein 2G4 OS=Homo sapiens GN=PA2G4 PE=1 SV=3 - [PA2G4_HUMAN]	0.9467	9	46	58	977	1.032	133	24.3	1.077	132	12.4	0.876	133	48.5	1.053	133	21.6	0.817	131	59.1	0.901	130	56.8	0.937	130	92.4	0.89	126	88.2	0.842	126	90.8	0.987	123	24.7	1.081	122	15	0.901	120	52.5	1	123	21.4	0.816	118	62.3	0.852
O60610	Protein diaphanous homolog 1 OS=Homo sapiens GN=DIAPH1 PE=1 SV=2 - [DIAP1_HUMAN]	0.673	16	45	125	510	0.937	37	15.7	1.073	37	11.1	0.635	37	46	1.012	37	19.3	0.655	36	54.4	0.686	37	47.5	0.684	35	63.9	0.652	35	74.3	0.613	35	79.4	1.031	39	20.6	1.096	40	15.5	0.705	39	45	0.988	39	20.7	0.694	39	70.4	0.603
P04406	Glyceraldehyde-3-phosphate dehydrogenase OS=Homo sapiens GN=GAPDH PE=1 SV=3 - [G3P_HUMAN]	0.991	11	45	60	4746	1.069	618	20.3	1.146	616	15	0.609	574	77.8	1.109	616	19.9	0.545	515	97.5	0.577	574	89.9	0.549	497	116.3	0.587	468	112	0.57	475	102.3	1.071	579	20.6	1.14	581	16.2	0.597	540	76.6	1.121	582	19.3	0.538	485	104.5	0.577
P30622	CAP-Gly domain-containing linker protein 1 OS=Homo sapiens GN=CLIP1 PE=1 SV=2 - [CLIP1_HUMAN]	0.8373	16	45	175	573	0.975	41	23	1.125	41	21.8	0.721	40	57.8	1.041	41	14.5	0.611	38	105.5	0.748	39	43	0.685	39	113.7	0.613	40	88.6	0.645	39	116.1	1.031	40	21.5	1.149	40	19	0.662	40	72.5	1.082	40	14.5	0.457	39	93.7	0.535
P36871	Phosphoglucomutase-1 OS=Homo sapiens GN=PGM1 PE=1 SV=3 - [PGM1_HUMAN]	0.9039	7	45	67	566	1	75	15.3	1.109	74	9.9	0.609	71	43.3	1.02	74	19	0.571	69	93.6	0.6	70	61.3	0.577	68	96.9	0.583	63	104.6	0.563	69	139	0.974	67	17.5	1.061	67	15.3	0.534	67	86.7	0.961	67	15.8	0.489	64	138.6	0.515
P49368	T-complex protein 1 subunit gamma OS=Homo sapiens GN=CCT3 PE=1 SV=4 - [TCPG_HUMAN]	0.9248	11	45	77	1004	1.035	125	13.9	1.104	124	13.4	0.644	123	57.6	1.068	125	14.9	0.549	119	78.6	0.608	121	52.8	0.56	111	92.5	0.49	112	98.1	0.518	112	97.7	1.055	116	18.4	1.091	116	14.6	0.742	115	46.7	1.071	115	14.6	0.667	112	73.2	0.703
P54577	Tyrosine--tRNA ligase, cytoplasmic OS=Homo sapiens GN=YARS PE=1 SV=4 - [SYYC_HUMAN]	0.8788	4	45	68	412	1.009	54	12.7	1.084	54	12	0.667	53	55.8	1.038	54	16.1	0.606	52	65	0.658	54	48	0.626	49	60.8	0.567	46	69.7	0.553	50	67.3	0.954	47	25.2	1.107	47	12.8	0.544	44	46.3	0.996	47	23.7	0.479	45	69.2	0.511
Q6KC79	Nipped-B-like protein OS=Homo sapiens GN=NIPBL PE=1 SV=2 - [NIPBL_HUMAN]	0.6865	7	45	237	667	0.748	32	39.6	0.673	31	40.7	1.917	32	41.8	0.804	31	25.9	2.423	31	36.7	2.217	32	35.9	1.823	31	35.7	1.771	32	61	1.711	31	36.9	0.783	34	26.5	0.757	34	27.5	1.856	34	47.7	0.715	34	32.7	2.589	33	39.3	2.542
P35580-5	Isoform 5 of Myosin-10 OS=Homo sapiens GN=MYH10 - [MYH10_HUMAN]	0.7738	15	45	218	795	1.098	39	17	1.075	39	11.3	0.655	37	48	1.086	39	17.7	0.624	36	48.8	0.648	38	45.4	0.472	37	74.4	0.533	36	63.6	0.518	36	48.6	1.032	38	15.6	1.006	37	16	0.576	34	57.5	1.025	38	19.7	0.556	31	64.6	0.571
A8K8U1	cDNA FLJ77762, highly similar to Homo sapiens cullin-associated and neddylation-dissociated 1 (CAND1), mRNA OS=Homo sapiens PE=2 SV=1 - [A8K8U1_HUMAN]	0.6569	12	45	95	516	1.052	54	25.4	1.052	53	13.4	0.714	53	42.7	1.052	53	20.8	0.712	53	46.1	0.777	52	33.8	0.594	51	87.9	0.634	50	67	0.614	53	76.1	1.1	56	22.7	1.045	56	10.2	0.7	55	37.9	1.047	56	21.5	0.663	54	41.9	0.747
Q12906-7	Isoform 7 of Interleukin enhancer-binding factor 3 OS=Homo sapiens GN=ILF3 - [ILF3_HUMAN]	0.7862	24	44	84	818	0.882	93	29	0.866	92	22.3	1.632	93	62.8	0.867	92	26.6	1.72	93	77	1.602	93	54.6	1.577	92	95.8	1.526	92	82.8	1.473	92	93.8	0.847	92	31.4	0.864	92	25.8	1.556	93	48.8	0.818	92	30.9	1.765	93	68.6	1.568
O43707	Alpha-actinin-4 OS=Homo sapiens GN=ACTN4 PE=1 SV=2 - [ACTN4_HUMAN]	0.8825	13	44	101	1027	1.032	93	18.4	1.121	93	15.4	0.742	89	79.8	1.059	93	19.6	0.709	86	90.1	0.718	84	68.6	0.657	84	84.4	0.671	82	82.3	0.7	78	94.2	1.059	98	19.1	1.123	98	13.4	0.671	92	67.5	1.026	98	19.5	0.61	87	83.9	0.642
P00558	Phosphoglycerate kinase 1 OS=Homo sapiens GN=PGK1 PE=1 SV=3 - [PGK1_HUMAN]	0.9928	7	44	70	1368	1.078	177	20.5	1.171	178	14.9	0.541	174	65.7	1.065	178	18.1	0.469	167	113	0.532	172	77.4	0.528	151	114.4	0.493	152	108.6	0.514	157	117.3	1.07	179	18.8	1.175	179	12.3	0.589	172	83.6	1.078	179	21.1	0.491	166	110.4	0.613
P05455	Lupus La protein OS=Homo sapiens GN=SSB PE=1 SV=2 - [LA_HUMAN]	0.9142	9	44	66	420	0.927	54	18.2	1.109	54	10.9	0.649	54	41.9	0.95	54	17.4	0.625	54	46.5	0.661	54	34.8	0.533	50	56.2	0.536	51	72.2	0.605	51	77.1	0.951	52	16.9	1.096	52	12.6	0.659	52	49.8	0.96	52	19.9	0.698	51	53.8	0.672
P13797	Plastin-3 OS=Homo sapiens GN=PLS3 PE=1 SV=4 - [PLST_HUMAN]	0.8016	17	44	67	493	1.019	59	21.8	1.158	58	16.5	0.58	54	35	1.092	59	13.5	0.513	53	71.7	0.577	57	54.5	0.586	51	88.4	0.57	54	85	0.532	54	103.3	1.074	63	22.6	1.16	63	16.9	0.502	59	59.2	1.092	63	18.6	0.429	56	89.9	0.53
P49916	DNA ligase 3 OS=Homo sapiens GN=LIG3 PE=1 SV=2 - [DNLI3_HUMAN]	0.8375	11	44	117	451	0.812	46	24.4	0.739	46	33.2	2.234	46	54.8	0.789	46	26.4	2.613	46	65.7	2.39	46	60.3	2.602	46	68.6	2.177	46	75.9	2.085	46	76.6	0.822	50	31.4	0.757	50	36.7	2.116	50	47.1	0.803	50	36.4	2.392	50	58.6	2.05
P52272	Heterogeneous nuclear ribonucleoprotein M OS=Homo sapiens GN=HNRNPM PE=1 SV=3 - [HNRPM_HUMAN]	0.9658	22	44	128	2463	0.849	128	25	0.758	129	27.1	2.053	129	50.7	0.836	128	26	2.158	129	58.5	1.959	129	43.4	2.124	128	67	1.965	127	65.6	2.129	129	66.6	0.812	133	25.2	0.751	132	31.7	2.148	133	51.8	0.848	133	29.7	2.17	133	53.3	1.997
P52701	DNA mismatch repair protein Msh6 OS=Homo sapiens GN=MSH6 PE=1 SV=2 - [MSH6_HUMAN]	0.6449	15	44	100	432	0.99	49	22.4	0.883	49	22.6	1.416	49	52.3	0.971	49	23.6	1.439	49	41.6	1.291	49	47.4	0.967	48	73.8	0.832	49	85.8	0.844	48	85.5	0.973	45	18.8	0.926	45	15.4	1.235	45	44.1	0.926	45	16.5	1.171	45	54.6	1.199
Q03701	CCAAT/enhancer-binding protein zeta OS=Homo sapiens GN=CEBPZ PE=1 SV=3 - [CEBPZ_HUMAN]	0.6888	3	44	88	489	0.808	44	28.2	0.802	44	42.6	1.675	47	37.5	0.823	43	21.2	2.322	47	56.3	2.128	48	51.1	2.636	48	51.7	1.84	46	72.7	2.368	46	54	0.815	41	30.7	0.752	42	37.5	1.536	43	36	0.831	42	35.3	2.178	43	48.9	2.035
Q96T58	Msx2-interacting protein OS=Homo sapiens GN=SPEN PE=1 SV=1 - [MINT_HUMAN]	0.5824	14	44	260	704	0.793	25	31.2	0.849	25	21.5	1.802	25	53.4	0.851	23	39.6	1.837	25	46.5	1.836	25	61.7	1.961	25	66.8	1.848	25	95.4	1.868	25	82	0.918	30	20.3	0.883	30	15.3	1.637	30	62.2	0.91	30	22.8	1.681	30	51	1.717
A8K964	cDNA FLJ75071, highly similar to Homo sapiens pinin, desmosome associated protein (PNN), mRNA OS=Homo sapiens PE=2 SV=1 - [A8K964_HUMAN]	0.7071	7	44	95	553	0.81	59	33.7	0.761	57	42.6	2.669	59	47.4	0.77	59	33.8	2.868	59	50.5	2.612	59	41.1	2.683	58	42.4	2.22	59	55	2.388	58	38.4	0.854	64	21.4	0.79	62	30.2	2.567	65	55	0.809	63	29.7	2.898	65	47	2.537
O14776	Transcription elongation regulator 1 OS=Homo sapiens GN=TCERG1 PE=1 SV=2 - [TCRG1_HUMAN]	0.5337	11	43	96	383	0.834	46	24.4	0.886	45	16.5	1.592	46	43.7	0.864	45	23.4	1.713	46	49	1.618	46	51.5	1.42	46	62.3	1.238	45	60	1.467	46	69.6	0.79	40	21.3	0.85	40	20.4	1.8	40	46.9	0.83	40	30.5	1.901	40	48.4	1.587
P49750-4	Isoform 4 of YLP motif-containing protein 1 OS=Homo sapiens GN=YLPM1 - [YLPM1_HUMAN]	0.5573	10	43	156	506	0.912	38	20.9	0.864	38	29.6	2.057	38	57.4	0.999	38	25.6	2.398	38	57.4	1.925	38	58.9	2.302	38	61.1	2.287	38	69.4	2.402	38	104.6	0.915	36	20.6	0.894	36	25.6	2.515	36	51.8	0.935	36	23.7	2.492	36	78.4	2.182
Q02790	Peptidyl-prolyl cis-trans isomerase FKBP4 OS=Homo sapiens GN=FKBP4 PE=1 SV=3 - [FKBP4_HUMAN]	0.9477	5	43	69	658	1.102	95	22.7	1.162	95	12.4	0.712	94	58.7	1.078	95	18.7	0.561	92	80.7	0.648	94	52.2	0.571	87	78.9	0.681	83	75.2	0.676	84	91.2	1.069	89	21.5	1.138	89	10	0.653	87	58.6	1.023	89	18.4	0.535	87	76.6	0.609
Q14692	Ribosome biogenesis protein BMS1 homolog OS=Homo sapiens GN=BMS1 PE=1 SV=1 - [BMS1_HUMAN]	0.7192	2	43	118	543	0.862	54	29	0.834	55	31.1	1.555	58	50.2	0.831	51	26.3	1.86	57	53.6	1.747	56	55.9	2.664	57	99.1	2.329	57	76	2.215	59	83.9	0.796	55	36.3	0.816	51	30.1	1.808	58	53.9	0.813	53	38.3	2.431	57	44.5	2.176
P04083	Annexin A1 OS=Homo sapiens GN=ANXA1 PE=1 SV=2 - [ANXA1_HUMAN]	0.9855	6	42	61	866	0.949	136	22.1	0.94	133	16.5	1.407	134	39.4	0.948	134	21.4	1.428	133	47.9	1.332	132	40.9	1.182	125	59.7	1.098	123	70.4	1.075	123	61.5	0.953	132	23.5	0.954	131	15.8	1.401	132	33.8	0.917	131	21.1	1.464	129	40.1	1.326
P13667	Protein disulfide-isomerase A4 OS=Homo sapiens GN=PDIA4 PE=1 SV=2 - [PDIA4_HUMAN]	0.7426	2	42	68	499	0.99	64	17.2	1.041	64	11.4	0.702	63	46.8	0.999	64	15	0.608	60	57.9	0.657	60	50.3	0.725	59	73.7	0.76	60	79.7	0.706	59	87	1.046	72	16.2	1.084	71	12	0.764	68	49.2	1.036	72	15.8	0.652	67	62.2	0.694
P23921	Ribonucleoside-diphosphate reductase large subunit OS=Homo sapiens GN=RRM1 PE=1 SV=1 - [RIR1_HUMAN]	0.8346	10	42	68	609	0.946	68	21.7	0.999	68	12.6	0.757	65	50.9	1.005	68	16.1	0.648	66	80.8	0.704	67	47.1	0.636	59	73.1	0.576	62	113.1	0.68	59	109.2	0.951	61	16.4	1.038	62	10.6	0.671	62	61.2	0.992	62	13.4	0.595	60	77.6	0.657
Q01813	ATP-dependent 6-phosphofructokinase, platelet type OS=Homo sapiens GN=PFKP PE=1 SV=2 - [PFKAP_HUMAN]	0.7921	11	42	90	699	1.072	72	24.5	1.067	71	18.2	0.666	67	50	1.049	71	22.5	0.691	68	70.2	0.743	68	44.2	0.687	58	85.7	0.716	57	70.3	0.744	56	82.7	1.095	69	26.6	1.141	69	21.9	0.754	63	50.7	1.022	69	20.9	0.639	64	64.2	0.688
Q8WWQ0	PH-interacting protein OS=Homo sapiens GN=PHIP PE=1 SV=2 - [PHIP_HUMAN]	0.7122	2	42	134	486	0.789	34	39.6	0.834	32	28.8	1.927	33	36.5	0.82	33	32	2.431	34	61.2	2.049	34	41	1.884	33	49.5	1.526	32	60.9	1.56	33	64.2	0.856	33	24.5	0.838	32	21.3	2.183	33	50.2	0.864	34	27.4	2.563	32	51.2	2.196
Q92576-2	Isoform 2 of PHD finger protein 3 OS=Homo sapiens GN=PHF3 - [PHF3_HUMAN]	0.6648	12	42	164	496	0.85	34	16.9	0.739	33	27.1	2.135	34	28.9	0.763	33	19.6	2.501	33	43.2	2.43	34	30.7	2.115	34	48.8	2.195	34	60.9	2.205	34	54.5	0.876	33	21.5	0.838	33	31.9	2.197	32	38	0.885	33	29.3	2.621	32	48.8	2.419
B2R6D0	cDNA, FLJ92896, highly similar to Homo sapiens proteasome (prosome, macropain) 26S subunit, non-ATPase, 1 (PSMD1), mRNA OS=Homo sapiens PE=2 SV=1 - [B2R6D0_HUMAN]	0.7335	10	42	80	389	1.004	49	16.6	1.033	49	13.6	0.539	48	50.3	0.994	49	18.7	0.551	46	43	0.546	48	38	0.516	42	70.4	0.427	40	93.5	0.474	45	80.7	1.045	49	22.8	1.123	49	13.3	0.587	47	46.2	1.056	49	26	0.485	45	69.8	0.565
B7ZMJ9	TACC2 protein OS=Homo sapiens GN=TACC2 PE=2 SV=1 - [B7ZMJ9_HUMAN]	0.5652	20	42	151	511	1.057	36	15.8	1.14	36	9.7	0.853	35	50.2	1.06	36	14.1	0.799	35	73.8	0.903	35	56.2	0.918	35	97	0.866	35	106.3	0.881	35	109	1.023	36	19.9	1.108	36	13.7	0.82	35	62.5	1.071	36	16.8	0.725	35	64.6	0.851
B3KMC9	cDNA FLJ10711 fis, clone NT2RP3000917, highly similar to 5'-3' exoribonuclease 2 (EC 3.1.11.-) OS=Homo sapiens PE=2 SV=1 - [B3KMC9_HUMAN]	0.6832	5	42	70	420	0.968	52	25	0.936	52	23.5	1.584	52	38.6	0.977	51	22.5	1.838	52	52.7	1.687	52	44.5	2.195	51	67.2	1.895	50	75.3	1.958	50	72.6	0.961	52	30.8	0.854	52	29.3	1.533	52	47.3	0.943	52	29.1	1.629	52	63.1	1.544
A0A087WTW0	E3 ubiquitin-protein ligase UHRF1 OS=Homo sapiens GN=UHRF1 PE=1 SV=1 - [A0A087WTW0_HUMAN]	0.8005	6	42	94	555	0.857	62	27.3	0.868	61	22.3	1.787	62	41.6	0.866	61	30.7	1.746	61	52.8	1.818	62	43.5	1.849	60	58.4	1.717	59	52.1	1.741	57	59.7	0.82	62	27.1	0.783	61	29.6	1.872	63	42.8	0.863	62	25.9	2.06	62	44.3	1.966
P49321-3	Isoform 3 of Nuclear autoantigenic sperm protein OS=Homo sapiens GN=NASP - [NASP_HUMAN]	0.9266	17	41	73	547	1.038	70	23	1.153	70	12.2	0.52	68	76.7	1.118	70	18.5	0.4	67	128.8	0.573	68	75.4	0.455	66	132.3	0.483	61	123.2	0.505	67	134.3	1.015	64	23.8	1.141	64	17.1	0.567	62	86.4	1.073	63	24.5	0.496	59	146.1	0.578
P50991	T-complex protein 1 subunit delta OS=Homo sapiens GN=CCT4 PE=1 SV=4 - [TCPD_HUMAN]	0.9072	6	41	64	1074	1.037	137	21	1.068	138	16.5	0.632	134	58.8	1.056	137	15.6	0.57	127	76.8	0.611	133	66.7	0.56	121	112.7	0.595	120	101.6	0.646	113	100.4	1.089	138	17.2	1.141	138	15.7	0.643	134	48.1	1.076	137	14.5	0.594	132	55.8	0.665
Q29RF7	Sister chromatid cohesion protein PDS5 homolog A OS=Homo sapiens GN=PDS5A PE=1 SV=1 - [PDS5A_HUMAN]	0.7517	7	41	125	433	0.849	38	26.8	0.828	38	30.5	1.347	38	49	0.832	38	31.7	1.719	38	54.2	1.706	38	57.4	1.523	37	60.2	1.27	37	51.1	1.295	37	70.4	0.827	32	26.7	0.847	31	33.5	1.312	31	38.8	0.815	32	28.6	1.669	31	54.7	1.626
Q5JTH9	RRP12-like protein OS=Homo sapiens GN=RRP12 PE=1 SV=2 - [RRP12_HUMAN]	0.6029	10	41	89	414	0.796	52	27.6	0.714	49	31.3	1.582	51	49.7	0.759	51	26.9	2.618	51	59	2.473	51	50.8	2.613	50	79.5	1.921	49	72.5	2.468	50	73.9	0.746	47	34.3	0.703	47	37.4	1.515	49	39.9	0.752	47	37.4	2.605	47	68	2.36
Q8WUM0	Nuclear pore complex protein Nup133 OS=Homo sapiens GN=NUP133 PE=1 SV=2 - [NU133_HUMAN]	0.7405	4	41	87	397	0.949	48	30.5	0.873	46	22.6	1.398	47	30.5	0.94	47	24.1	1.701	47	37.5	1.607	47	50.2	1.32	44	62.3	1.186	43	58.8	1.235	44	60.5	0.922	40	26.3	0.829	38	26.1	1.416	39	43.7	0.969	39	27.5	1.756	38	59	1.795
Q93008	Probable ubiquitin carboxyl-terminal hydrolase FAF-X OS=Homo sapiens GN=USP9X PE=1 SV=3 - [USP9X_HUMAN]	0.5019	8	41	148	513	1.063	28	14.7	1.08	28	13.1	0.809	27	49.4	1.096	28	21.2	0.712	25	103.7	0.777	26	56.4	0.883	25	83.6	0.884	25	91.7	0.824	25	59.4	1.104	38	18.4	1.116	37	16.2	0.776	37	51.4	1.087	37	18.2	0.663	35	65.2	0.7
Q9GZR7	ATP-dependent RNA helicase DDX24 OS=Homo sapiens GN=DDX24 PE=1 SV=1 - [DDX24_HUMAN]	0.8813	16	41	95	499	0.837	50	29	0.824	49	33.5	1.916	50	51.5	0.847	48	25.5	2.526	50	66.4	2.231	50	62.8	3.484	49	89.8	2.896	49	86	2.678	50	81.7	0.79	51	23.1	0.818	51	27.7	2.066	52	50.5	0.827	50	29.2	2.414	52	49.4	2.219
Q9H2P0	Activity-dependent neuroprotector homeobox protein OS=Homo sapiens GN=ADNP PE=1 SV=1 - [ADNP_HUMAN]	0.6978	4	41	87	437	0.849	50	31.8	0.733	50	31.3	2.61	50	56.2	0.784	50	33.2	2.926	49	67	2.346	48	56.6	2.668	49	69.6	2.411	49	83.8	2.565	49	82.2	0.818	49	34.7	0.797	49	30.9	2.361	48	47	0.812	49	27.8	2.727	49	53.5	2.174
Q9P258	Protein RCC2 OS=Homo sapiens GN=RCC2 PE=1 SV=2 - [RCC2_HUMAN]	0.9042	2	41	56	657	0.908	87	17.3	0.864	87	27.1	2.09	87	49.3	0.891	87	20.5	2.408	87	64.4	1.983	87	43.7	2.361	86	54.6	1.947	86	67.2	2.071	85	54.4	0.899	79	22.7	0.857	79	19.5	2.073	80	42	0.856	80	28.3	2.378	80	46.3	1.983
A0A024R2Z6	Guanine nucleotide binding protein-like 3 (Nucleolar), isoform CRA_b OS=Homo sapiens GN=GNL3 PE=4 SV=1 - [A0A024R2Z6_HUMAN]	0.8324	6	41	67	573	0.929	79	25.2	0.914	79	22.7	1.665	79	40.2	0.929	77	23.7	2.13	77	46.8	1.78	78	42.9	2.81	78	76.5	2.819	76	75.7	2.78	79	74.4	0.892	77	24.5	0.892	76	22.4	1.766	77	60	0.883	77	25.9	2.215	76	68.3	1.746
O94776	Metastasis-associated protein MTA2 OS=Homo sapiens GN=MTA2 PE=1 SV=1 - [MTA2_HUMAN]	0.8982	10	40	93	601	0.912	59	32.7	0.856	60	29.7	2.136	61	52	0.908	59	33.6	2.449	61	54.3	2.084	61	46.2	2.41	61	64.2	2.164	60	72.1	2.41	61	64.1	0.836	59	32.6	0.813	59	31.3	2.327	60	37.1	0.814	60	35.6	2.504	60	47.5	2.249
P16435	NADPH--cytochrome P450 reductase OS=Homo sapiens GN=POR PE=1 SV=2 - [NCPR_HUMAN]	0.7504	13	40	60	418	0.93	59	20.2	0.84	59	20.9	0.891	56	36.2	0.928	59	12.7	0.849	57	55	0.964	57	50.2	0.721	55	85.7	0.642	53	79.3	0.708	52	79.9	0.98	52	21.6	0.917	52	23.2	0.845	50	55.9	0.955	52	20.9	0.855	51	52.7	0.954
P41250	Glycine--tRNA ligase OS=Homo sapiens GN=GARS PE=1 SV=3 - [SYG_HUMAN]	0.8363	4	40	72	511	1.048	62	21.9	1.117	62	14.4	0.668	59	53.6	1.058	62	19.1	0.628	55	45	0.649	60	44.9	0.616	57	65.4	0.589	57	107.8	0.559	54	75.2	1.065	61	19.7	1.11	62	14.8	0.604	59	75.5	1.075	62	19.8	0.507	58	61.4	0.583
P54136	Arginine--tRNA ligase, cytoplasmic OS=Homo sapiens GN=RARS PE=1 SV=2 - [SYRC_HUMAN]	0.7091	5	40	70	372	1.136	53	21.1	1.121	52	11.1	0.595	52	58.4	1.105	53	15.2	0.569	49	60.3	0.641	52	42.1	0.528	47	62.5	0.575	46	66	0.556	47	89	1.097	42	17.1	1.097	41	13.8	0.471	40	92.7	1.096	42	21.1	0.463	38	105.9	0.53
Q13200	26S proteasome non-ATPase regulatory subunit 2 OS=Homo sapiens GN=PSMD2 PE=1 SV=3 - [PSMD2_HUMAN]	0.7489	11	40	70	356	0.894	36	15.8	1.035	36	17.8	0.55	33	69.8	0.923	36	19.7	0.539	32	91	0.522	34	67.6	0.623	29	65.7	0.651	27	88.9	0.711	25	51.1	1.004	43	20.7	1.156	43	12.4	0.686	40	46.6	1.055	43	19.9	0.616	40	92.8	0.638
Q7L2E3-2	Isoform 2 of Putative ATP-dependent RNA helicase DHX30 OS=Homo sapiens GN=DHX30 - [DHX30_HUMAN]	0.784	5	40	106	374	1.085	37	28.2	1.004	37	26.4	0.668	35	40.3	1.081	37	29	0.641	34	75	0.768	36	65	0.633	29	80.8	0.666	30	72.9	0.683	30	85.3	1.057	31	21.6	0.952	31	16.6	0.674	31	55.5	0.987	31	27.7	0.752	28	57.6	0.855
Q7Z6E9	E3 ubiquitin-protein ligase RBBP6 OS=Homo sapiens GN=RBBP6 PE=1 SV=1 - [RBBP6_HUMAN]	0.6445	9	40	162	484	0.845	32	31	0.9	32	18.1	2.042	32	45.9	0.902	32	22.9	2.056	32	49	1.968	32	38	1.986	32	51.8	2.022	32	50.3	1.958	32	39.2	0.841	29	20.9	0.854	29	19.2	2.111	29	68.3	0.834	29	28.1	2.532	29	49.8	2.066
Q86U86-8	Isoform 8 of Protein polybromo-1 OS=Homo sapiens GN=PBRM1 - [PB1_HUMAN]	0.6229	20	40	122	412	0.848	33	28.7	0.834	33	40.2	2.027	33	66	0.936	33	33.1	2.536	33	55.1	2.077	33	55.9	2.347	33	42.4	1.996	32	71.2	2.109	33	33.5	0.787	29	21.9	0.818	29	31	2.043	29	47.1	0.816	29	30.8	2.257	29	59.1	2.246
Q8NE71	ATP-binding cassette sub-family F member 1 OS=Homo sapiens GN=ABCF1 PE=1 SV=2 - [ABCF1_HUMAN]	0.8071	10	40	105	672	0.872	59	18.3	0.895	60	16.8	1.563	57	40	0.9	60	23.4	1.74	59	48.9	1.613	59	38.4	1.617	56	54	1.581	57	60.2	1.408	58	58.8	0.902	58	26.5	0.945	59	16.2	1.602	58	53.9	0.928	59	26.2	1.748	58	62.6	1.515
Q9Y4C8	Probable RNA-binding protein 19 OS=Homo sapiens GN=RBM19 PE=1 SV=3 - [RBM19_HUMAN]	0.7375	2	40	92	449	0.891	41	27.2	0.864	40	31.2	2.062	41	71	0.914	41	19.9	2.338	41	70.1	1.829	41	58.6	4.026	41	74.5	4.543	40	75	3.806	41	89	0.799	41	31.2	0.81	40	41.9	2.243	40	70.8	0.862	40	29.4	2.688	39	59.2	2.08
O75874	Isocitrate dehydrogenase [NADP] cytoplasmic OS=Homo sapiens GN=IDH1 PE=1 SV=2 - [IDHC_HUMAN]	0.9638	12	39	65	798	1.076	89	19.5	1.147	88	10.4	0.596	88	53	1.107	89	20.1	0.563	85	64.4	0.601	88	53.9	0.607	82	60.7	0.652	82	77.6	0.573	83	84.3	1.109	110	21.9	1.182	110	14.1	0.582	109	47	1.158	110	20.7	0.522	106	70.5	0.588
P11498	Pyruvate carboxylase, mitochondrial OS=Homo sapiens GN=PC PE=1 SV=2 - [PYC_HUMAN]	0.7182	4	39	97	433	0.977	47	19.1	0.997	47	13.2	0.854	47	38	1	47	15.8	0.842	46	37.5	0.752	46	52.5	0.754	42	68.2	0.76	42	71.3	0.732	42	55	1.005	39	14.5	1.004	39	12.8	0.903	38	41.9	1	39	16.1	0.755	37	46.5	0.714
P17987	T-complex protein 1 subunit alpha OS=Homo sapiens GN=TCP1 PE=1 SV=1 - [TCPA_HUMAN]	0.946	12	39	61	797	1.048	106	14.5	1.076	104	11	0.736	104	53.2	1.045	106	16.4	0.612	96	73.8	0.667	101	56.2	0.676	94	72.3	0.698	90	59	0.644	93	88.4	1.027	107	19.3	1.104	109	16.1	0.662	105	51.7	1.056	109	17.8	0.582	100	72	0.596
P22626	Heterogeneous nuclear ribonucleoproteins A2/B1 OS=Homo sapiens GN=HNRNPA2B1 PE=1 SV=2 - [ROA2_HUMAN]	0.9858	5	39	62	2621	0.811	316	38.4	0.746	308	43.9	2.475	318	63.7	0.808	309	37.2	2.737	318	78	2.332	317	63.6	2.785	316	81.7	2.515	315	78.5	2.538	316	81.9	0.827	300	35.4	0.745	294	45.6	2.377	303	71.6	0.795	300	39.9	2.674	304	78.9	2.26
P55060-3	Isoform 3 of Exportin-2 OS=Homo sapiens GN=CSE1L - [XPO2_HUMAN]	0.5556	9	39	67	504	1.006	48	16.7	1.065	47	13.1	0.711	46	53.2	0.995	47	18.9	0.832	46	58	0.84	46	46.8	0.657	44	87.3	0.724	43	89.2	0.652	45	92	1.069	45	18.1	1.044	45	14.4	0.789	44	45.8	1.031	45	17.9	0.943	43	40	0.86
Q13823	Nucleolar GTP-binding protein 2 OS=Homo sapiens GN=GNL2 PE=1 SV=1 - [NOG2_HUMAN]	0.8098	3	39	84	435	0.855	44	18.5	0.844	44	23.8	1.898	43	50.9	0.849	44	23.5	2.459	44	63.7	2.177	43	80.3	3.031	44	79.3	3.017	44	99.6	3.435	45	90.3	0.903	45	24.4	0.774	44	29.1	2.231	45	58	0.804	42	32.6	2.828	46	106	2.51
Q16658	Fascin OS=Homo sapiens GN=FSCN1 PE=1 SV=3 - [FSCN1_HUMAN]	0.8479	6	39	55	846	1.074	108	16.1	1.128	108	15	0.66	106	73.3	1.099	108	17.1	0.584	104	111.2	0.672	107	73.3	0.673	101	105.2	0.758	97	147.8	0.745	101	135	1.093	110	19.8	1.167	110	16.9	0.693	106	65.5	1.144	110	19.5	0.654	100	105.1	0.688
Q5VTR2	E3 ubiquitin-protein ligase BRE1A OS=Homo sapiens GN=RNF20 PE=1 SV=2 - [BRE1A_HUMAN]	0.8256	6	39	125	449	0.936	31	22.8	0.927	32	14.1	1.4	31	27.3	0.958	31	22.7	1.494	31	37.1	1.351	31	42.5	1.155	31	72.3	1.254	31	75.2	1.287	31	70.1	0.933	29	19.9	0.864	29	9.9	1.542	29	43.2	0.88	29	16.5	1.507	29	38.8	1.393
Q8TDD1-2	Isoform 2 of ATP-dependent RNA helicase DDX54 OS=Homo sapiens GN=DDX54 - [DDX54_HUMAN]	0.805	5	39	93	411	0.828	44	34.1	0.853	42	40.3	1.552	45	65.8	0.825	42	34.2	1.941	45	77.8	1.869	45	60.6	2.488	45	99.5	2.246	44	103.3	2.439	44	70.2	0.882	35	34.5	0.797	34	27	1.655	35	40.1	0.829	34	32.9	2.287	35	50.1	1.994
Q59EL4	PRPF4 protein variant (Fragment) OS=Homo sapiens PE=2 SV=1 - [Q59EL4_HUMAN]	0.8529	5	39	60	397	0.913	50	24.8	0.843	49	20.1	1.631	49	27.7	0.948	49	31.8	1.742	50	50.4	1.569	50	45.8	1.611	49	67.3	1.65	50	66.8	1.729	49	54.9	0.864	55	28.1	0.889	55	27.3	1.677	55	47.2	0.882	55	18.9	1.628	54	54.6	1.546
A0A024R5X3	SAFB-like, transcription modulator, isoform CRA_b OS=Homo sapiens GN=SLTM PE=4 SV=1 - [A0A024R5X3_HUMAN]	0.6558	15	39	123	417	0.954	35	26.3	0.879	34	17.3	2.382	35	46.1	0.933	35	30.9	2.855	35	58.4	2.422	35	47.1	3.024	35	62.5	3.113	35	71.2	3.478	35	64.2	0.853	40	24.6	0.853	39	21.9	2.327	40	52.4	0.862	40	21.3	2.605	40	47.6	2.338
O14646	Chromodomain-helicase-DNA-binding protein 1 OS=Homo sapiens GN=CHD1 PE=1 SV=2 - [CHD1_HUMAN]	0.6953	6	38	153	472	0.793	29	36.5	0.766	28	24.6	1.961	30	31.5	0.781	29	33.8	2.562	30	48	2.454	30	32.9	2.017	30	42.4	1.81	30	47.7	1.883	30	50.6	0.777	32	28.3	0.732	30	30.2	2.112	32	50	0.73	31	42.4	2.656	32	58.6	2.296
O43175	D-3-phosphoglycerate dehydrogenase OS=Homo sapiens GN=PHGDH PE=1 SV=4 - [SERA_HUMAN]	0.743	11	38	56	879	1.068	108	15.4	1.117	108	14.8	0.576	108	59.4	1.064	108	15.8	0.573	103	81.6	0.583	104	54.8	0.576	98	74.2	0.548	92	89.1	0.565	94	108.3	1.031	100	18.1	1.128	99	13	0.617	97	73.4	1.033	100	15.2	0.561	93	76.8	0.582
P02786	Transferrin receptor protein 1 OS=Homo sapiens GN=TFRC PE=1 SV=2 - [TFR1_HUMAN]	0.7	14	38	75	436	0.981	48	16.2	0.776	48	18.2	0.587	47	61.6	0.868	48	20.3	0.577	46	86.7	0.664	47	58.8	0.543	45	113.7	0.567	42	122.2	0.562	44	108.4	1.075	51	20.4	0.803	51	16.1	0.639	51	65.7	0.88	51	21.7	0.587	50	95	0.641
P04843	Dolichyl-diphosphooligosaccharide--protein glycosyltransferase subunit 1 OS=Homo sapiens GN=RPN1 PE=1 SV=1 - [RPN1_HUMAN]	0.8386	8	38	76	418	1.001	56	19.9	0.833	56	22.3	0.875	55	42.3	1.006	56	21.7	0.905	55	42.2	0.969	55	45.3	0.749	49	84.2	0.71	49	82.4	0.72	49	71.4	0.993	53	23.1	0.807	54	16.3	0.849	52	39.6	0.988	53	23.2	0.893	51	47.8	0.993
P19338	Nucleolin OS=Homo sapiens GN=NCL PE=1 SV=3 - [NUCL_HUMAN]	0.8394	8	38	162	3820	0.838	144	29.6	0.849	144	34.1	1.99	146	57.7	0.799	146	38.4	2.611	146	75.6	2.239	146	75.9	4.842	145	103.1	4.57	144	121.3	4.842	145	108.4	0.835	157	32.6	0.82	157	33.6	2.075	159	58.3	0.781	154	41.7	2.817	161	69.8	2.256
P35221-2	Isoform 2 of Catenin alpha-1 OS=Homo sapiens GN=CTNNA1 - [CTNA1_HUMAN]	0.7796	27	38	93	432	1.051	42	19.8	1.083	42	10.8	0.783	39	42.5	1.053	41	17.9	0.674	38	49.9	0.766	38	51.6	0.658	36	72.7	0.716	36	88.7	0.665	36	98	1.047	38	24	1.066	38	17.6	0.871	36	46.7	1.051	38	26.1	0.766	34	65	0.81
P62424	60S ribosomal protein L7a OS=Homo sapiens GN=RPL7A PE=1 SV=2 - [RL7A_HUMAN]	0.9098	4	38	62	734	1.063	105	14.2	1.112	104	12.2	0.938	104	43.4	1.038	104	15.4	1.041	102	45.8	0.956	104	36.5	1.13	101	59	1.005	98	57.2	1.087	101	60.3	1.053	99	18.8	1.092	99	13.4	0.885	98	42.1	1.012	99	16.6	0.961	98	41.7	0.927
Q7Z2W4	Zinc finger CCCH-type antiviral protein 1 OS=Homo sapiens GN=ZC3HAV1 PE=1 SV=3 - [ZCCHV_HUMAN]	0.8603	8	38	89	383	1.025	33	16.4	1.05	33	15.5	0.966	32	38.6	1.028	33	15.9	1.048	32	47	0.915	32	44	1.295	31	50.2	1.096	31	60.2	1.149	32	57.4	0.953	36	12.2	0.992	36	11.2	0.877	35	25.4	1.013	36	16.2	0.959	35	44.8	0.923
Q8IUD2	ELKS/Rab6-interacting/CAST family member 1 OS=Homo sapiens GN=ERC1 PE=1 SV=1 - [RB6I2_HUMAN]	0.8844	15	38	152	542	1.062	34	18.9	1.071	34	14.3	0.987	34	52	1.041	34	17.5	1.063	33	48.7	1.086	32	42.7	1.124	32	67.8	1.096	31	83.8	1.157	30	64.5	0.981	35	10.6	1.049	35	21.4	0.923	35	44.5	0.967	35	18.9	0.936	33	50.4	0.887
Q96T37	Putative RNA-binding protein 15 OS=Homo sapiens GN=RBM15 PE=1 SV=2 - [RBM15_HUMAN]	0.7881	6	38	103	398	0.83	34	37.1	0.773	34	30.3	2.388	35	98	0.816	35	38.8	2.685	35	103.3	2.299	35	111.5	2.673	34	119.4	2.472	34	114.4	2.598	33	104.5	0.896	35	25.9	0.826	34	39	2.364	35	78.3	0.853	34	34.9	3	35	91.2	2.51
Q9Y2X3	Nucleolar protein 58 OS=Homo sapiens GN=NOP58 PE=1 SV=1 - [NOP58_HUMAN]	0.7732	5	38	63	646	0.822	96	34.9	0.779	97	37.6	1.86	97	47.6	0.806	97	36.4	2.109	97	56.5	2.048	97	52.5	3.027	97	100.5	2.628	96	82.9	2.472	96	79.3	0.75	92	41.8	0.757	91	47.1	1.77	94	45.7	0.772	94	41	1.946	94	48.9	1.901
Q9Y4L1	Hypoxia up-regulated protein 1 OS=Homo sapiens GN=HYOU1 PE=1 SV=1 - [HYOU1_HUMAN]	0.7497	26	38	94	433	1.006	38	13.6	1.043	38	8.9	0.716	38	38.1	0.984	38	14.9	0.612	36	68.3	0.615	37	60.1	0.416	33	104.2	0.444	34	88.6	0.529	32	76.4	0.929	41	21.8	1.022	40	13.9	0.756	38	44.5	0.919	41	21.6	0.709	38	83.6	0.737
Q6NUR7	Ezrin OS=Homo sapiens GN=EZR PE=2 SV=1 - [Q6NUR7_HUMAN]	0.8737	14	38	98	740	0.97	55	25.6	1.045	55	12.9	0.553	51	78.2	1.015	55	18.3	0.529	49	145.4	0.637	50	91.3	0.525	41	133.8	0.63	42	100.5	0.533	40	107.7	0.982	49	17.9	1.085	49	9.5	0.582	49	52.6	1.051	49	12.8	0.441	44	95.2	0.496
B3KMS0	Condensin complex subunit 1 OS=Homo sapiens PE=2 SV=1 - [B3KMS0_HUMAN]	0.7273	7	38	109	425	1.059	34	18.6	1.034	35	12.6	0.911	34	43.4	1.104	35	23.9	0.931	34	56.1	1.094	33	43.1	0.818	33	90.5	0.715	33	102	0.762	34	88.4	1.068	36	22.8	1.019	36	16	0.896	35	38.4	1.067	36	17.9	0.815	35	67.7	0.913
D3DPU2	Adenylyl cyclase-associated protein OS=Homo sapiens GN=CAP1 PE=2 SV=1 - [D3DPU2_HUMAN]	0.9558	19	37	62	474	1.098	59	22.5	1.155	59	17.4	0.619	58	61.4	1.089	59	20.1	0.573	55	96.6	0.611	58	75.2	0.631	52	72.9	0.591	53	104.5	0.664	53	82.9	1.035	60	18.4	1.175	60	17.3	0.57	58	61	1.084	60	18.7	0.522	57	92	0.612
O95757	Heat shock 70 kDa protein 4L OS=Homo sapiens GN=HSPA4L PE=1 SV=3 - [HS74L_HUMAN]	0.8308	10	37	99	551	1.009	41	19.8	1.117	40	13.2	0.744	39	54.6	1.064	41	14.5	0.586	38	88.5	0.62	37	48.2	0.666	38	81.7	0.654	35	103.4	0.638	37	114.5	1.009	49	22.1	1.115	49	11.8	0.672	46	54.6	1.001	48	21	0.633	45	95.3	0.636
P04075	Fructose-bisphosphate aldolase A OS=Homo sapiens GN=ALDOA PE=1 SV=2 - [ALDOA_HUMAN]	0.9863	17	37	54	1438	1.079	166	19.7	1.143	166	15.8	0.696	164	60.4	1.1	167	17.6	0.56	162	96.2	0.617	162	78.1	0.658	159	103.6	0.705	150	92.1	0.677	153	101.9	1.046	170	22.1	1.153	170	15.2	0.667	164	73	1.084	170	22.4	0.588	162	102.9	0.631
P35606	Coatomer subunit beta' OS=Homo sapiens GN=COPB2 PE=1 SV=2 - [COPB2_HUMAN]	0.7539	10	37	78	432	1	48	28	0.928	48	17.4	0.738	48	48.2	1.038	48	17.1	0.683	48	60.5	0.774	48	51.5	0.585	43	84.6	0.509	45	88	0.644	45	78.3	0.931	38	16.1	0.9	38	12.8	0.817	37	46.6	1.013	38	16.5	0.601	38	82	0.805
Q08945	FACT complex subunit SSRP1 OS=Homo sapiens GN=SSRP1 PE=1 SV=1 - [SSRP1_HUMAN]	0.8406	5	37	77	468	0.785	54	23.3	0.783	52	23.8	2.183	54	63.1	0.753	53	31.5	2.867	55	58.9	2.292	54	44.6	2.606	52	53.7	2.364	49	44.4	2.348	51	53.4	0.823	56	38	0.823	53	34.3	2.102	56	57.9	0.785	55	35	2.578	55	61.1	2.2
Q14527	Helicase-like transcription factor OS=Homo sapiens GN=HLTF PE=1 SV=2 - [HLTF_HUMAN]	0.7384	10	37	101	397	0.838	31	24.7	0.802	31	31.2	1.475	31	43.6	0.836	30	19.1	1.741	30	42.9	1.803	31	52.5	1.635	26	52.7	1.218	29	64.8	1.197	27	61.9	0.809	25	39.3	0.853	25	23	1.619	25	29	0.926	25	20.1	1.873	24	27.5	1.74
Q6PKG0	La-related protein 1 OS=Homo sapiens GN=LARP1 PE=1 SV=2 - [LARP1_HUMAN]	0.7217	19	37	99	464	1.023	48	23.5	1.068	48	14.6	0.688	47	46.7	1.002	48	24.8	0.613	47	64.1	0.653	47	58.6	0.622	44	58.8	0.583	46	94	0.607	45	85	1.026	46	19	1.103	46	14.9	0.804	46	60.6	1.023	46	23.2	0.71	45	73.9	0.752
Q8TEQ6	Gem-associated protein 5 OS=Homo sapiens GN=GEMIN5 PE=1 SV=3 - [GEMI5_HUMAN]	0.6645	3	37	101	377	1.158	36	18.6	1.047	35	15.8	0.69	34	50.1	1.059	35	15.2	0.817	35	66.9	0.845	34	45.3	0.73	34	60.1	0.638	34	96.9	0.685	32	67.1	1.055	33	17.1	0.944	33	13.7	0.699	32	54.2	1.023	34	18.2	0.718	33	74.6	0.8
Q92922	SWI/SNF complex subunit SMARCC1 OS=Homo sapiens GN=SMARCC1 PE=1 SV=3 - [SMRC1_HUMAN]	0.7276	7	37	105	581	0.855	52	25.7	0.905	52	20.1	2.115	52	70.2	0.871	52	21.8	2.236	52	74.9	1.924	52	64.4	2.1	52	85.9	2.17	52	77.2	1.859	52	76.9	0.834	47	21.5	0.893	47	20.2	2.099	48	88.8	0.826	47	29.1	2.34	48	86.3	2.176
Q9BUJ2-2	Isoform 2 of Heterogeneous nuclear ribonucleoprotein U-like protein 1 OS=Homo sapiens GN=HNRNPUL1 - [HNRL1_HUMAN]	0.7351	22	37	88	512	0.905	52	15.1	0.921	52	12.7	1.593	52	42.6	0.911	52	19.3	1.709	52	48.4	1.516	52	34	1.464	52	52.7	1.428	51	66.4	1.377	52	61.8	0.966	65	16.6	0.89	65	22.3	1.55	63	37.8	0.945	64	25.4	1.61	64	52.1	1.423
D3DS96	Bromodomain adjacent to zinc finger domain, 1A, isoform CRA_c OS=Homo sapiens GN=BAZ1A PE=4 SV=1 - [D3DS96_HUMAN]	0.6444	11	37	130	427	0.765	32	17.9	0.74	32	26.9	1.945	32	43	0.793	32	22.9	2.269	32	50.7	2.067	32	45.9	1.677	31	66.2	1.413	30	93.6	1.518	31	80.5	0.81	31	21.7	0.763	31	29.2	2.329	30	38.3	0.802	31	25.4	2.413	31	51.8	2.372
B4DHJ3	DNA-directed RNA polymerase subunit beta OS=Homo sapiens PE=2 SV=1 - [B4DHJ3_HUMAN]	0.6795	9	37	98	417	0.891	36	19.2	0.876	36	27.4	1.274	35	37.8	0.948	36	24.4	1.745	36	49.4	1.494	36	39.6	1.343	34	48.2	1.178	34	39.7	1.205	32	34.9	0.945	43	17.2	0.87	44	25.9	1.351	44	41	0.873	44	25.1	1.837	43	45.9	1.718
Q308M6	DNA polymerase OS=Homo sapiens PE=2 SV=1 - [Q308M6_HUMAN]	0.7749	11	37	98	357	1.086	31	12.4	1.061	31	20	0.715	29	32.3	1.074	31	18.9	0.76	28	60.1	0.819	28	40.3	0.724	28	62.8	0.728	27	74.6	0.685	28	92	1.038	24	11.4	1.087	24	12.5	0.627	24	56.5	1.008	24	21.7	0.651	22	50.5	0.681
Q6MZZ3	Putative uncharacterized protein DKFZp686I0746 OS=Homo sapiens GN=DKFZp686I0746 PE=2 SV=1 - [Q6MZZ3_HUMAN]	0.7277	21	37	120	416	1.097	25	22.1	1.091	25	10	0.827	25	52.9	1.063	25	23.5	0.586	25	83.7	0.823	25	52.6	0.817	25	120.5	0.737	24	85.4	0.833	24	111.9	0.96	27	26.3	1.113	27	18	0.635	26	61.8	1.077	27	31.2	0.672	27	61.6	0.708
P12268	Inosine-5'-monophosphate dehydrogenase 2 OS=Homo sapiens GN=IMPDH2 PE=1 SV=2 - [IMDH2_HUMAN]	0.7879	6	36	50	455	1.013	57	21.6	1.11	58	13.8	0.539	53	56.4	1.063	58	20	0.492	53	64.9	0.54	53	62.4	0.47	50	70.8	0.466	50	75.5	0.431	50	71.5	1.039	59	19.6	1.133	58	14.5	0.585	56	39.3	1.117	58	19.1	0.502	55	71.2	0.612
Q13573	SNW domain-containing protein 1 OS=Homo sapiens GN=SNW1 PE=1 SV=1 - [SNW1_HUMAN]	0.8657	12	36	83	404	0.866	43	22.8	0.852	43	33.4	2.023	43	48.2	0.814	43	38.6	2.164	43	45.8	1.7	43	51.2	1.908	42	68.3	1.768	40	51.9	1.913	41	48.1	0.987	44	24.1	0.831	43	27	2.039	44	65	0.959	44	27.9	2.193	42	73.4	2.004
Q14137	Ribosome biogenesis protein BOP1 OS=Homo sapiens GN=BOP1 PE=1 SV=2 - [BOP1_HUMAN]	0.8552	8	36	76	522	0.973	69	22	0.948	68	24.9	1.653	69	70.9	0.961	69	29.2	1.921	66	83.7	1.825	69	68.6	2.936	68	110.6	3.032	67	101.8	2.679	67	118	0.94	60	35.5	0.887	59	25.2	1.576	61	54.3	0.948	60	28.8	2.04	60	56.1	1.783
Q9BXJ9	N-alpha-acetyltransferase 15, NatA auxiliary subunit OS=Homo sapiens GN=NAA15 PE=1 SV=1 - [NAA15_HUMAN]	0.7333	10	36	87	367	1.069	34	20.6	1.078	34	15.6	0.563	34	52.8	1.021	34	15.8	0.491	34	89	0.517	34	48.8	0.437	33	160.8	0.514	32	170.8	0.516	33	89.2	1.111	33	13.3	1.105	33	10.3	0.532	33	63.2	1.122	33	16.8	0.536	32	48.6	0.592
Q68DU0	Putative uncharacterized protein DKFZp781O2021 OS=Homo sapiens GN=DKFZp781O2021 PE=2 SV=1 - [Q68DU0_HUMAN]	0.8337	40	36	94	354	1.003	33	11	0.997	33	11.9	1.195	33	32.8	0.993	33	13.9	1.192	33	44.9	1.215	33	42.6	1.254	33	43.8	1.23	33	58.8	1.002	33	62.7	0.941	30	20.2	0.984	31	17	1.122	29	35.7	0.994	30	21.2	1.155	27	32.7	1.017
B4DLV7	Rab GDP dissociation inhibitor OS=Homo sapiens PE=2 SV=1 - [B4DLV7_HUMAN]	0.9777	11	36	60	580	1.041	57	21.6	1.102	57	12.3	0.559	57	63.8	1.097	57	20.8	0.497	53	89	0.548	56	74.4	0.528	51	73.9	0.525	49	78.3	0.374	52	115.9	1.023	54	22.7	1.125	53	11.2	0.521	50	68.3	1.043	54	16.2	0.523	42	76.1	0.505
A0A0A0MTS2	Glucose-6-phosphate isomerase (Fragment) OS=Homo sapiens GN=GPI PE=1 SV=1 - [A0A0A0MTS2_HUMAN]	0.8237	17	36	70	1098	1.086	103	23	1.147	103	14.4	0.527	100	64.3	1.056	103	21.6	0.47	97	96.6	0.526	99	75.3	0.568	91	92.4	0.59	88	121.5	0.555	89	104.1	1.123	106	23.7	1.156	106	18.6	0.582	103	58.4	1.059	106	25.8	0.495	96	94.1	0.577
P49959-3	Isoform 3 of Double-strand break repair protein MRE11A OS=Homo sapiens GN=MRE11A - [MRE11_HUMAN]	0.7623	10	35	77	337	0.894	39	13.9	0.899	38	20	1.646	39	45	0.92	38	16.4	1.513	39	53	1.48	39	37.7	1.665	38	67.3	1.411	37	89.4	1.301	35	68.8	0.96	33	36.6	0.957	31	15.5	1.542	33	43.4	0.956	33	26.6	1.592	31	50.4	1.38
O43395	U4/U6 small nuclear ribonucleoprotein Prp3 OS=Homo sapiens GN=PRPF3 PE=1 SV=2 - [PRPF3_HUMAN]	0.795	6	35	78	370	0.897	45	14.5	0.886	45	17.3	1.9	45	49	0.913	45	17	2.203	45	41.1	1.814	45	34.3	1.99	45	48.9	1.838	45	73.5	2.071	45	56.4	0.864	45	14.8	0.877	45	24.7	1.922	45	37.4	0.897	44	26.2	2.116	45	40.2	1.868
P06733	Alpha-enolase OS=Homo sapiens GN=ENO1 PE=1 SV=2 - [ENOA_HUMAN]	0.9447	13	35	67	2784	1.105	254	20.5	1.157	254	12.8	0.499	237	76.3	1.116	252	18.7	0.469	207	94	0.505	236	77.2	0.488	197	106.1	0.459	189	104.8	0.426	195	110	1.097	234	16.5	1.177	234	15.1	0.49	222	66.4	1.123	234	16.9	0.464	202	103	0.487
P22234	Multifunctional protein ADE2 OS=Homo sapiens GN=PAICS PE=1 SV=3 - [PUR6_HUMAN]	0.8306	5	35	45	451	0.976	63	23.8	1.095	63	15.4	0.564	60	62.6	1.072	63	15.2	0.509	54	97.7	0.541	59	85.2	0.606	51	76.2	0.586	51	66.8	0.564	51	95.3	1.036	63	20.2	1.092	62	17.5	0.538	60	76.7	1.054	63	19.1	0.542	56	100.9	0.488
P43304	Glycerol-3-phosphate dehydrogenase, mitochondrial OS=Homo sapiens GN=GPD2 PE=1 SV=3 - [GPDM_HUMAN]	0.8198	12	35	72	296	1.004	39	14.5	0.94	38	16.3	0.761	38	35.7	0.935	39	16.2	0.643	36	65.3	0.695	37	48.4	0.641	36	76.2	0.714	34	59.6	0.962	33	109.3	1.019	31	23.9	0.962	31	12.7	0.832	31	23.5	1.009	31	19.6	0.706	31	55.9	0.699
P49411	Elongation factor Tu, mitochondrial OS=Homo sapiens GN=TUFM PE=1 SV=2 - [EFTU_HUMAN]	0.8761	2	35	49	447	0.997	64	23.7	1.032	64	11.8	0.712	64	46.8	1.016	64	17.7	0.642	61	68.3	0.654	60	43.4	0.597	58	88.2	0.63	53	88.2	0.579	58	91.5	1.01	66	21.1	1.015	66	18.6	0.812	66	51.1	1.054	66	17.1	0.589	62	73.2	0.651
P61247	40S ribosomal protein S3a OS=Homo sapiens GN=RPS3A PE=1 SV=2 - [RS3A_HUMAN]	0.8939	15	35	60	783	1.05	100	21.4	1.103	100	15.2	0.942	100	54.1	1.054	100	23.7	0.837	98	66.6	0.89	98	48.4	0.884	94	86	0.88	92	79.5	0.827	97	102.5	1.047	98	20.5	1.129	98	18.4	0.78	96	49	1.061	98	17.8	0.795	94	76.4	0.765
Q02241	Kinesin-like protein KIF23 OS=Homo sapiens GN=KIF23 PE=1 SV=3 - [KIF23_HUMAN]	0.8156	7	35	115	434	0.939	34	17.5	0.947	31	15.9	1.295	32	35.4	0.915	33	14.4	1.205	32	42.3	1.054	32	49.4	1.299	31	48.8	1.265	31	50.6	1.446	31	52.9	0.947	32	10.5	0.931	32	15.5	1.243	30	30	0.941	32	16.3	1.217	29	43	1.007
Q02878	60S ribosomal protein L6 OS=Homo sapiens GN=RPL6 PE=1 SV=3 - [RL6_HUMAN]	0.8889	13	35	57	537	0.959	92	15.7	1.066	91	13.4	0.88	90	45.8	1.052	92	17.2	0.875	89	65.1	0.886	91	46.3	0.951	85	74.1	0.865	85	94.3	0.848	85	72.4	0.991	85	25.4	1.052	85	16	0.909	84	51.2	1.04	85	23.9	1.009	82	64.7	0.987
Q13206	Probable ATP-dependent RNA helicase DDX10 OS=Homo sapiens GN=DDX10 PE=1 SV=2 - [DDX10_HUMAN]	0.7474	5	35	83	379	0.899	33	18.4	0.88	33	19.4	1.626	34	30.6	0.911	33	20.3	1.911	34	42.2	1.676	34	40.9	2.849	34	57.2	2.608	34	73.3	2.745	33	56.4	0.851	30	16.7	0.848	30	24.2	1.753	30	43.3	0.828	30	23.3	2.238	30	48.3	2.042
Q15050	Ribosome biogenesis regulatory protein homolog OS=Homo sapiens GN=RRS1 PE=1 SV=2 - [RRS1_HUMAN]	0.9425	1	35	71	464	0.85	58	35.2	0.78	56	37.4	2.131	59	46.3	0.814	56	34.5	2.574	59	51.6	2.318	57	47.8	3.609	57	63.6	3.23	57	58.4	4.228	59	79.1	0.844	58	26.2	0.777	58	35.2	1.823	59	49	0.768	59	27.1	2.357	59	47.5	2.148
Q8IY81	pre-rRNA processing protein FTSJ3 OS=Homo sapiens GN=FTSJ3 PE=1 SV=2 - [SPB1_HUMAN]	0.7308	7	35	81	476	0.888	48	24.4	0.79	48	40.4	1.44	49	45.8	0.858	49	30.2	1.964	49	74.1	1.851	49	72.6	2.449	49	83.1	1.851	49	72.2	2.362	48	70.5	0.765	52	40.3	0.764	53	39.1	1.645	54	53.7	0.806	52	42	2.144	54	87.7	2.209
Q9BSC4	Nucleolar protein 10 OS=Homo sapiens GN=NOL10 PE=1 SV=1 - [NOL10_HUMAN]	0.7863	6	35	74	464	0.923	48	37.1	0.833	48	30.9	1.941	48	60.7	0.859	48	26.2	2.332	48	63.4	1.903	48	63.8	4.048	48	115.8	4.425	48	123.5	3.823	47	105.5	0.867	56	26.4	0.881	56	27.5	1.934	57	38.2	0.931	57	31	2.187	58	43	1.964
Q9H6R4-4	Isoform 4 of Nucleolar protein 6 OS=Homo sapiens GN=NOL6 - [NOL6_HUMAN]	0.5398	8	35	74	387	0.804	47	27.6	0.844	46	30.9	1.545	47	40	0.838	47	27.6	2.498	46	73.5	2.34	47	61.2	2.787	46	85.3	2.442	45	60.8	2.698	46	82	0.874	54	28.6	0.846	53	26.6	1.597	54	42.4	0.891	54	23.9	2.303	53	56.7	2.105
Q9Y265	RuvB-like 1 OS=Homo sapiens GN=RUVBL1 PE=1 SV=1 - [RUVB1_HUMAN]	0.8904	8	35	54	568	1.013	85	21.7	0.996	84	11.1	1.313	85	36.8	1.015	85	16.8	1.266	85	44.7	1.202	85	37.6	1.152	82	58.3	1.155	82	74.8	1.153	81	62.6	0.998	79	20.1	1.007	80	11.2	1.226	79	55.6	0.996	80	17.8	1.271	79	58	1.232
P08237-3	Isoform 3 of ATP-dependent 6-phosphofructokinase, muscle type OS=Homo sapiens GN=PFKM - [PFKAM_HUMAN]	0.7145	24	35	76	409	1.05	37	18.2	1.08	37	11.6	0.74	37	68.3	1.022	37	11.2	0.703	37	109	0.838	37	56.3	0.711	34	133.6	0.814	35	105.2	0.85	35	106.5	1.068	49	23.5	1.075	49	13.6	0.776	47	66.9	1.104	49	23.8	0.796	46	86.9	0.63
O60832	H/ACA ribonucleoprotein complex subunit 4 OS=Homo sapiens GN=DKC1 PE=1 SV=3 - [DKC1_HUMAN]	0.8268	9	34	53	410	0.815	62	35.3	0.743	62	31.3	1.681	61	40.4	0.753	62	31.8	2.203	62	45.4	1.961	62	46.5	2.983	62	84.1	2.662	61	92.6	2.563	62	60.7	0.773	55	41.3	0.761	53	29.8	1.747	56	36.6	0.746	54	32.1	2.174	56	46.2	2.156
P00338-3	Isoform 3 of L-lactate dehydrogenase A chain OS=Homo sapiens GN=LDHA - [LDHA_HUMAN]	0.9945	25	34	55	714	0.982	84	22.2	1.128	85	16.9	0.557	79	73.4	0.994	85	24.3	0.469	72	81.4	0.528	81	74.2	0.551	67	112.4	0.486	70	139.3	0.575	71	100.4	0.94	79	31.5	1.109	79	13.8	0.528	72	61.5	1.016	79	19.7	0.463	65	88.3	0.455
P41091	Eukaryotic translation initiation factor 2 subunit 3 OS=Homo sapiens GN=EIF2S3 PE=1 SV=3 - [IF2G_HUMAN]	0.7246	5	34	53	373	0.997	50	17	1.028	50	11.5	0.724	50	56.6	1.015	50	13.1	0.726	50	62	0.76	50	56.1	0.791	49	109.2	0.789	47	102.1	0.76	49	99.7	1.06	48	14	1.056	48	13.8	0.84	48	48.7	1.07	48	21.7	0.89	47	60.7	0.765
P46063	ATP-dependent DNA helicase Q1 OS=Homo sapiens GN=RECQL PE=1 SV=3 - [RECQ1_HUMAN]	0.829	7	34	74	451	0.893	42	24.6	0.894	42	15.9	1.072	42	52.7	0.871	42	22.9	1.422	43	54.3	1.154	42	49.7	1.084	41	72	1.003	42	103.8	0.927	40	92.6	0.936	41	25.5	0.92	41	8.8	0.965	40	41.9	0.929	41	25.7	1.281	41	40.5	1.147
P46459	Vesicle-fusing ATPase OS=Homo sapiens GN=NSF PE=1 SV=3 - [NSF_HUMAN]	0.7796	16	34	81	332	1.056	34	20.8	0.955	34	9.1	0.954	34	35.7	1.076	34	12.5	0.852	34	40.9	0.848	34	39.1	0.818	34	65.1	0.693	32	82.4	0.631	33	66.3	1.016	34	19.2	0.957	34	19.2	0.891	34	24.7	1.043	34	14	0.886	33	21.6	0.891
P54886	Delta-1-pyrroline-5-carboxylate synthase OS=Homo sapiens GN=ALDH18A1 PE=1 SV=2 - [P5CS_HUMAN]	0.7145	2	34	63	423	0.943	57	22.3	0.919	57	20	0.847	56	46.1	0.922	57	15.1	0.744	55	97.2	0.822	53	49.9	0.685	50	85.2	0.588	49	95.1	0.611	49	78.5	0.908	47	22.8	0.932	47	18.9	0.83	45	41.4	0.977	47	20.8	0.694	41	56.8	0.743
Q12789	General transcription factor 3C polypeptide 1 OS=Homo sapiens GN=GTF3C1 PE=1 SV=4 - [TF3C1_HUMAN]	0.6837	10	34	170	499	0.957	27	29.6	0.891	27	23.1	1.271	27	40.6	0.959	27	20.9	1.665	27	35.5	1.54	27	43.7	1.525	23	101.2	0.998	25	106.7	1.445	24	99.9	0.954	26	30.9	0.8	26	33.2	1.258	26	48.7	0.911	26	31.2	1.585	26	47.1	1.414
Q15046	Lysine--tRNA ligase OS=Homo sapiens GN=KARS PE=1 SV=3 - [SYK_HUMAN]	0.7052	8	34	58	388	1.016	45	8.5	1.111	46	8	0.642	45	68.8	1.075	45	12.1	0.609	41	60.5	0.633	43	58.5	0.629	38	94.9	0.653	39	59.4	0.686	38	81.5	1.008	41	14.3	1.093	41	13.8	0.68	41	46	1.059	41	15.3	0.577	39	55.7	0.694
Q8IX12-2	Isoform 2 of Cell division cycle and apoptosis regulator protein 1 OS=Homo sapiens GN=CCAR1 - [CCAR1_HUMAN]	0.6432	8	34	100	496	0.875	48	18.4	0.845	48	29.2	2.159	48	68.1	0.833	48	36.4	2.235	48	63.4	2.122	48	53.1	2.232	48	71.3	1.862	47	53.7	1.811	47	53.5	0.814	47	34.7	0.841	47	38.5	2.081	48	66.2	0.855	46	40.4	2.186	48	71.7	2.106
Q92974	Rho guanine nucleotide exchange factor 2 OS=Homo sapiens GN=ARHGEF2 PE=1 SV=4 - [ARHG2_HUMAN]	0.8519	21	34	112	399	1.002	30	20.6	1.031	30	18.1	1.001	29	55.6	1.019	30	16.9	0.884	29	48.9	0.882	29	65.9	0.875	28	82.3	0.922	28	95.1	0.701	27	92.3	0.98	31	19.7	0.995	31	14.2	0.944	30	65.2	0.976	31	20.4	0.84	30	66.6	0.937
Q96ST3	Paired amphipathic helix protein Sin3a OS=Homo sapiens GN=SIN3A PE=1 SV=2 - [SIN3A_HUMAN]	0.5734	10	34	92	325	0.735	25	23.7	0.648	24	37.1	1.622	25	39	0.72	25	28.9	2.266	25	68.3	1.836	25	46.9	1.71	24	78.4	1.437	23	80.6	1.356	24	70.2	0.798	27	26.8	0.709	27	35.3	1.945	27	28.8	0.77	27	20.8	2.431	27	38.2	2.26
Q9UGU0	Transcription factor 20 OS=Homo sapiens GN=TCF20 PE=1 SV=3 - [TCF20_HUMAN]	0.6444	4	34	141	491	0.94	22	27.5	0.817	22	26	2.234	22	50.6	0.875	22	21	2.459	22	59.6	2.038	22	44.1	2.23	22	65.1	1.987	21	67.3	2.231	21	59.8	0.822	32	21.4	0.806	32	27.2	1.973	32	43.5	0.825	33	18.6	2.288	32	65.6	1.936
Q9UHB9	Signal recognition particle subunit SRP68 OS=Homo sapiens GN=SRP68 PE=1 SV=2 - [SRP68_HUMAN]	0.8182	10	34	80	319	1.013	40	19.2	0.971	40	20.6	0.824	40	43.1	1.031	40	22.8	0.772	40	63.4	0.81	40	37.8	0.711	36	70.3	0.644	35	81.3	0.647	36	86.9	1.028	32	17.4	1.022	32	19.3	0.87	32	30.1	1.023	32	23.7	0.787	32	41.8	0.919
Q9Y5J1	U3 small nucleolar RNA-associated protein 18 homolog OS=Homo sapiens GN=UTP18 PE=1 SV=3 - [UTP18_HUMAN]	0.9514	7	34	57	428	0.916	44	28.3	0.963	42	20.9	1.679	44	31.6	0.904	44	30	2.071	44	43.8	1.719	44	36.7	3.302	44	86.1	3.789	43	68.2	3.125	43	82.2	0.868	41	16.7	0.851	39	29.8	1.872	42	46.9	0.912	39	26.9	2.175	42	49.8	1.719
Q53G71	Calreticulin variant (Fragment) OS=Homo sapiens PE=2 SV=1 - [Q53G71_HUMAN]	0.8448	10	34	46	883	1.023	103	14.9	1.055	103	13.7	0.675	102	53.4	1.076	103	15.4	0.538	101	64.4	0.575	103	70.4	0.511	90	115	0.484	91	104.8	0.459	93	120.7	1.04	114	19	1.088	114	12.3	0.653	112	48.4	1.066	114	17.8	0.557	109	75.5	0.575
B2R659	cDNA, FLJ92803, highly similar to Homo sapiens hydroxysteroid (17-beta) dehydrogenase 4 (HSD17B4), mRNA OS=Homo sapiens PE=2 SV=1 - [B2R659_HUMAN]	0.7351	16	34	62	341	0.973	40	19	0.915	40	12.9	0.869	40	46.3	0.966	40	21.1	0.871	40	47.3	0.909	40	43.9	0.822	39	70.4	0.796	40	96	0.794	39	78.3	0.974	42	22.2	0.944	42	13.9	0.804	41	43.5	1	42	21.2	0.706	40	61.6	0.747
Q03164-3	Isoform 3 of Histone-lysine N-methyltransferase 2A OS=Homo sapiens GN=KMT2A - [KMT2A_HUMAN]	0.5509	72	33	258	703	0.943	19	33	0.81	19	18.3	2.302	20	37.1	0.771	20	29.2	2.233	20	49.6	2.032	20	35	2.322	19	90.3	2.085	20	101	2.246	20	83.6	0.819	19	15.5	0.785	19	25.5	2.257	19	42.6	0.752	18	23.6	2.433	19	36.2	2.13
Q9H9Y6-3	Isoform 3 of DNA-directed RNA polymerase I subunit RPA2 OS=Homo sapiens GN=POLR1B - [RPA2_HUMAN]	0.6138	18	33	83	327	1.002	29	27.9	0.825	29	18.2	1.314	28	40.3	0.89	28	18.6	1.905	29	46.5	1.59	29	49.5	1.801	29	73.2	1.435	27	69.1	1.682	28	49.9	0.856	28	14.3	0.829	27	33.5	1.34	27	53.7	0.832	27	22.2	2.101	27	35.1	1.905
Q99613-2	Isoform 2 of Eukaryotic translation initiation factor 3 subunit C OS=Homo sapiens GN=EIF3C - [EIF3C_HUMAN]	0.7553	15	33	84	449	1.064	49	18.2	1.074	49	18.3	0.643	49	62.2	1.018	49	20.4	0.64	47	81.7	0.74	49	47.5	0.669	45	73.9	0.678	47	88.7	0.67	46	83.4	1.066	51	18.5	1.074	51	14.2	0.638	50	69.7	1.03	51	23.9	0.653	50	94.1	0.717
O00267-2	Isoform 2 of Transcription elongation factor SPT5 OS=Homo sapiens GN=SUPT5H - [SPT5H_HUMAN]	0.651	6	33	95	502	0.957	40	15.2	0.941	40	27.3	1.694	40	47.4	0.891	40	27.4	1.756	40	51.4	1.748	40	52.3	1.936	40	50.5	2.018	40	60.8	1.796	40	55.3	0.921	42	30.7	0.965	42	24.3	1.684	42	41.6	0.939	42	22.7	2.018	42	59.8	1.706
P21399	Cytoplasmic aconitate hydratase OS=Homo sapiens GN=ACO1 PE=1 SV=3 - [ACOC_HUMAN]	0.793	4	33	64	245	1.067	31	17	1.107	31	10.4	0.726	29	61.3	1.102	31	14.7	0.6	29	86.6	0.777	30	63.5	0.662	27	92.5	0.868	27	68.2	0.771	28	109	1.06	29	20	1.09	29	15.9	0.797	28	42	1.088	29	13.2	0.749	28	73.6	0.723
P27694	Replication protein A 70 kDa DNA-binding subunit OS=Homo sapiens GN=RPA1 PE=1 SV=2 - [RFA1_HUMAN]	0.763	4	33	57	323	0.973	36	18.7	0.981	36	12.7	1.198	36	38.4	0.96	36	19.7	1.499	36	29.9	1.326	36	28.5	1.029	36	54.7	1.045	35	47.1	1.092	35	56.6	0.993	37	14.6	1	38	12.3	1.193	37	30.3	0.956	37	16.5	1.421	38	34.2	1.324
Q12965	Unconventional myosin-Ie OS=Homo sapiens GN=MYO1E PE=1 SV=2 - [MYO1E_HUMAN]	0.7148	11	33	101	418	1.005	35	15.5	0.932	35	14.3	0.719	34	17.6	0.964	35	14.8	0.737	34	43.2	0.771	34	31.5	0.819	33	73.5	0.831	33	67.4	0.771	33	68.5	1.004	34	10.9	1.013	34	10.5	0.763	32	40.3	0.968	34	8.7	0.682	32	63.6	0.731
Q13123	Protein Red OS=Homo sapiens GN=IK PE=1 SV=3 - [RED_HUMAN]	0.8115	13	33	68	454	0.844	63	35.6	0.747	62	31.2	2.222	63	63.3	0.854	62	32.7	2.444	63	71.6	2.208	63	54.6	2.461	63	87.2	2.371	63	68	2.588	63	87.2	0.768	58	45.7	0.747	58	35.9	2.191	58	59.8	0.893	57	36.9	2.497	58	70.1	2.192
Q16881-3	Isoform 3 of Thioredoxin reductase 1, cytoplasmic OS=Homo sapiens GN=TXNRD1 - [TRXR1_HUMAN]	0.8679	25	33	65	423	1.133	57	29.6	1.144	57	25.1	0.662	51	70.3	1.147	57	21.2	0.699	50	65.3	0.7	54	57.9	0.588	45	81.2	0.612	46	73.4	0.611	50	79.4	1.055	53	11.7	1.062	53	20.6	0.649	49	65.8	1.079	53	15.4	0.604	47	81.8	0.712
Q8NI27	THO complex subunit 2 OS=Homo sapiens GN=THOC2 PE=1 SV=2 - [THOC2_HUMAN]	0.5832	14	33	114	421	0.744	33	24.8	0.713	33	32.8	1.667	33	31.1	0.746	33	36.7	2.271	31	28.7	2.062	33	31.7	1.521	33	45.4	1.377	31	51.6	1.596	30	43.9	0.726	34	40.8	0.655	34	36	1.599	34	31.6	0.718	34	31	2.217	34	28	2.081
Q9UMS4	Pre-mRNA-processing factor 19 OS=Homo sapiens GN=PRPF19 PE=1 SV=1 - [PRP19_HUMAN]	0.8413	5	33	44	904	0.933	88	33	0.835	87	29.9	2.168	88	53.3	0.917	88	25.3	2.278	88	50.7	1.992	88	45.4	2.124	88	72.6	1.729	87	73	1.532	87	83.3	0.894	87	22.9	0.84	86	22.1	2.193	88	43.7	0.91	88	22.8	2.305	88	62.9	1.924
Q9Y230	RuvB-like 2 OS=Homo sapiens GN=RUVBL2 PE=1 SV=3 - [RUVB2_HUMAN]	0.9093	8	33	61	503	0.948	68	19.8	0.999	67	17.4	1.421	68	43.2	0.971	68	25.6	1.446	63	37.7	1.31	65	35.8	1.473	66	63.4	1.351	63	61	1.376	61	66.9	0.936	64	22.7	0.965	65	15.7	1.323	65	38.2	0.966	65	21.6	1.419	63	52.4	1.294
D6W625	Chromatin assembly factor 1, subunit A (P150), isoform CRA_a OS=Homo sapiens GN=CHAF1A PE=4 SV=1 - [D6W625_HUMAN]	0.6308	6	33	74	368	0.879	35	34.7	0.867	35	21	2.692	36	48.3	0.935	34	33	2.987	36	50.6	2.744	36	36.4	2.775	36	60.5	2.517	34	76.4	2.773	36	57.4	0.843	36	32	0.808	33	27.5	2.308	36	51.7	0.811	35	39.8	2.594	36	57.2	2.45
Q4LE38	IKBKAP variant protein (Fragment) OS=Homo sapiens GN=IKBKAP variant protein PE=2 SV=1 - [Q4LE38_HUMAN]	0.6908	11	33	83	275	1.028	34	18.7	1.096	34	11.6	0.725	33	40.3	1.085	34	14.6	0.722	33	39.7	0.694	33	32.4	0.688	33	63.4	0.748	33	57.4	0.6	33	57	1.059	26	16.7	1.067	26	15.8	0.672	25	42.7	1.047	26	13.6	0.534	25	56.6	0.661
B4DRM3	cDNA FLJ54492, highly similar to Eukaryotic translation initiation factor 4B OS=Homo sapiens PE=2 SV=1 - [B4DRM3_HUMAN]	0.7549	13	33	86	570	1.043	61	13.5	1.104	61	12.9	0.907	61	44.7	1.07	61	16.6	0.93	61	55.7	0.94	61	34.8	0.904	60	74.9	1.019	59	62.3	0.98	58	84.3	0.995	71	15.2	1.089	71	10.6	0.81	71	38.9	1.038	71	17.3	0.764	70	60.6	0.863
P34897-3	Isoform 3 of Serine hydroxymethyltransferase, mitochondrial OS=Homo sapiens GN=SHMT2 - [GLYM_HUMAN]	0.9172	27	32	55	449	0.992	62	18.6	1.005	62	9	0.784	61	38.5	1.02	62	16.2	0.596	60	53.4	0.611	61	42.5	0.614	59	63.4	0.551	60	72.5	0.49	57	77.1	0.977	59	21.3	1.037	59	13	0.834	59	33.1	1.001	59	15.5	0.668	57	59.1	0.657
E7ERS3	Zinc finger CCCH domain-containing protein 18 OS=Homo sapiens GN=ZC3H18 PE=1 SV=1 - [E7ERS3_HUMAN]	0.6489	11	32	89	377	0.776	34	31.8	0.743	34	31.9	2.619	34	68.4	0.835	33	35.8	2.704	34	71.1	2.727	34	59	3.058	34	88.7	2.924	34	86.1	3.401	34	100.7	0.815	38	31.9	0.771	38	21.8	2.234	38	35.8	0.841	38	39.6	2.666	38	49.4	2.515
P49748-3	Isoform 3 of Very long-chain specific acyl-CoA dehydrogenase, mitochondrial OS=Homo sapiens GN=ACADVL - [ACADV_HUMAN]	0.8215	16	32	57	332	0.981	39	20.3	0.905	39	22.2	0.79	36	45.8	0.958	39	20.9	0.767	36	67.2	0.68	37	65.3	0.724	34	79.7	0.759	34	88.2	0.791	32	100.2	0.979	44	16.9	0.937	44	9.2	0.738	43	56.5	0.942	43	18.4	0.524	40	51.6	0.633
P08621	U1 small nuclear ribonucleoprotein 70 kDa OS=Homo sapiens GN=SNRNP70 PE=1 SV=2 - [RU17_HUMAN]	0.6178	9	32	41	533	0.751	68	39	0.756	68	41.3	2.249	68	58.2	0.793	68	39.3	2.556	68	72.5	2.177	68	59.6	2.136	68	88.6	1.929	68	97.3	2.118	68	70.8	0.797	75	33.2	0.795	73	27.6	2.36	76	62.1	0.754	76	35.5	2.538	76	65.2	2.235
P14735	Insulin-degrading enzyme OS=Homo sapiens GN=IDE PE=1 SV=4 - [IDE_HUMAN]	0.6693	5	32	82	278	1.082	28	20.4	1.093	28	12.7	0.566	26	58.1	1.094	28	17.5	0.622	24	68.4	0.57	28	63.2	0.536	25	76.4	0.636	25	67.7	0.595	23	62	1.128	23	21.4	1.129	23	7.4	0.491	23	53.2	1.072	23	17.3	0.43	20	49.3	0.539
P14868	Aspartate--tRNA ligase, cytoplasmic OS=Homo sapiens GN=DARS PE=1 SV=2 - [SYDC_HUMAN]	0.9341	10	32	59	341	0.886	29	23.3	1.084	28	8.8	0.74	29	66.9	0.958	29	15.7	0.614	29	117.1	0.828	28	65.7	0.692	26	95.1	0.882	27	81.8	1.037	27	67.2	0.919	34	23.2	1.064	34	8.1	0.613	33	45.7	0.977	34	19.7	0.651	32	57.1	0.606
P15170-2	Isoform 2 of Eukaryotic peptide chain release factor GTP-binding subunit ERF3A OS=Homo sapiens GN=GSPT1 - [ERF3A_HUMAN]	0.6321	8	32	56	414	1.072	56	16.3	1.128	56	12.3	0.602	56	63.2	1.128	56	18.2	0.474	51	76.6	0.557	55	75.4	0.493	47	115.9	0.498	49	121.4	0.455	48	125.6	1.083	55	17.3	1.078	55	12.1	0.606	54	64	1.046	55	20.9	0.568	52	102.8	0.57
P26641	Elongation factor 1-gamma OS=Homo sapiens GN=EEF1G PE=1 SV=3 - [EF1G_HUMAN]	0.8513	7	32	43	558	1.111	77	22.5	1.104	77	14.7	0.719	73	62.9	1.098	76	13.3	0.689	70	72.7	0.706	73	69.5	0.591	67	96.1	0.695	63	96.4	0.644	65	78.3	1.073	78	18.9	1.099	78	11.9	0.662	75	60.7	1.046	78	15.9	0.642	71	70.6	0.667
P35241	Radixin OS=Homo sapiens GN=RDX PE=1 SV=1 - [RADI_HUMAN]	0.8027	13	32	80	612	1.028	42	21.7	1.105	42	11.6	0.704	41	63.5	1.047	42	22.8	0.627	40	64.7	0.666	42	71.4	0.749	37	67.8	0.648	39	107.9	0.591	38	91.6	0.996	43	26.4	1.108	43	14.9	0.676	43	68.8	1.098	43	22.6	0.551	42	120.2	0.697
P48147	Prolyl endopeptidase OS=Homo sapiens GN=PREP PE=1 SV=2 - [PPCE_HUMAN]	0.7127	3	32	54	231	1.012	29	16.4	1.142	29	13.4	0.605	28	42.2	1.071	29	15.8	0.615	27	64.4	0.614	28	49.8	0.544	27	71.7	0.57	27	47.2	0.556	27	59.3	1.038	26	22.1	1.154	26	11.7	0.544	25	30.2	1.064	26	13.7	0.485	25	58.7	0.579
Q13085-2	Isoform 2 of Acetyl-CoA carboxylase 1 OS=Homo sapiens GN=ACACA - [ACACA_HUMAN]	0.6831	27	32	159	441	1.075	23	15.1	1.042	23	12	0.82	23	30	1.042	23	10.6	0.762	21	30.3	0.831	23	20.3	0.69	23	59.1	0.736	20	56.4	0.715	23	39.2	1.038	21	20.1	1.091	21	13.2	0.801	21	37.9	1.088	21	17.3	0.805	20	72.8	0.76
Q14974	Importin subunit beta-1 OS=Homo sapiens GN=KPNB1 PE=1 SV=2 - [IMB1_HUMAN]	0.6689	9	32	59	663	0.998	71	14.6	0.987	70	11.2	1.063	71	38.8	1.02	71	17.7	1.128	71	36.1	1.198	71	30.8	0.997	67	64.4	0.897	68	75.6	0.868	66	70.8	1.004	66	18.4	0.978	67	13	1.009	65	43.3	0.965	67	18.6	1.125	66	46.8	1.16
Q1KMD3	Heterogeneous nuclear ribonucleoprotein U-like protein 2 OS=Homo sapiens GN=HNRNPUL2 PE=1 SV=1 - [HNRL2_HUMAN]	0.6734	2	32	70	363	0.842	36	26.7	0.809	36	24.5	1.893	36	45.2	0.859	36	26.3	2.001	36	54.1	2.03	35	47.3	1.584	36	61.9	1.277	36	47.9	1.527	35	66.3	0.916	43	19.9	0.814	43	19.8	2.07	43	46.6	0.906	43	21.1	2.162	43	45.5	2.006
Q2NL82	Pre-rRNA-processing protein TSR1 homolog OS=Homo sapiens GN=TSR1 PE=1 SV=1 - [TSR1_HUMAN]	0.6393	4	32	71	344	0.981	37	27.2	0.97	37	11.7	1.124	37	40	0.911	37	22.8	1.104	36	50	1.282	35	33.3	1.261	34	63.8	1.166	33	75.1	1.243	33	59.9	1.032	40	16	0.98	40	10	1.198	39	31.9	0.967	40	19.3	1.231	38	32.6	1.264
Q6PD62	RNA polymerase-associated protein CTR9 homolog OS=Homo sapiens GN=CTR9 PE=1 SV=1 - [CTR9_HUMAN]	0.6539	3	32	92	400	0.932	31	26.8	0.854	31	21.7	1.437	31	55.1	0.918	31	18.9	1.579	31	47.1	1.696	31	56.5	1.754	31	67	1.593	31	50.7	1.593	31	62.4	0.923	30	17	0.891	30	28	1.745	29	40.8	0.852	30	18.5	1.955	30	58	1.829
Q6PL18	ATPase family AAA domain-containing protein 2 OS=Homo sapiens GN=ATAD2 PE=1 SV=1 - [ATAD2_HUMAN]	0.6914	5	32	118	384	0.74	25	45.7	0.752	25	63.5	2.187	25	86.4	0.759	25	59.9	2.209	25	65.8	2.037	25	89.5	2.262	24	109.5	2.032	24	129.7	1.671	24	93	0.768	23	31.8	0.72	23	25.7	1.784	24	54.6	0.81	24	40.2	2.182	23	53.5	1.998
Q8NFC6	Biorientation of chromosomes in cell division protein 1-like 1 OS=Homo sapiens GN=BOD1L1 PE=1 SV=2 - [BD1L1_HUMAN]	0.528	19	32	206	611	0.928	25	21.7	0.925	25	11.5	2.018	24	32.1	0.933	25	19.3	2.007	24	44.5	1.875	25	39.8	1.887	24	52.8	1.926	25	51.8	1.731	25	62.8	0.877	24	19.5	0.846	24	22.7	1.955	24	43.1	0.907	24	23	2.063	24	56.1	1.815
Q8NI36	WD repeat-containing protein 36 OS=Homo sapiens GN=WDR36 PE=1 SV=1 - [WDR36_HUMAN]	0.571	2	32	64	337	0.857	28	27.3	0.805	28	32.3	1.416	28	33.1	0.904	27	24.2	2.38	29	69	2.283	29	56.9	2.833	29	103.7	2.078	29	64.1	2.291	29	70.2	0.819	32	23.3	0.775	32	30.5	1.474	31	40.2	0.836	32	28.7	1.901	31	48.8	1.961
Q96I24	Far upstream element-binding protein 3 OS=Homo sapiens GN=FUBP3 PE=1 SV=2 - [FUBP3_HUMAN]	0.8759	3	32	60	508	0.99	51	18.7	0.907	51	22.7	1.741	51	36.9	0.968	51	25.2	1.821	50	43.4	1.711	51	43.7	1.648	49	41.7	1.532	48	58.6	1.475	47	37.9	0.925	49	27.1	0.918	49	22.1	1.699	48	41.1	0.93	48	21.6	1.769	49	50.7	1.734
Q96PK6	RNA-binding protein 14 OS=Homo sapiens GN=RBM14 PE=1 SV=2 - [RBM14_HUMAN]	0.6143	11	32	54	559	0.806	75	39.1	0.815	73	28.1	2.367	74	50	0.847	73	34.6	2.513	75	60.2	2.19	74	53.2	2.429	74	58.5	2.553	73	58.6	2.446	74	52.4	0.807	68	31.5	0.825	67	38.7	2.117	69	61.6	0.833	67	35.6	2.392	69	68	2.126
Q99615	DnaJ homolog subfamily C member 7 OS=Homo sapiens GN=DNAJC7 PE=1 SV=2 - [DNJC7_HUMAN]	0.8219	17	32	70	558	1.002	38	12.8	1.168	38	8.7	0.591	37	42.2	1.005	38	11.7	0.475	36	58.8	0.605	37	40.5	0.556	36	53.3	0.563	34	73.4	0.478	35	62.2	1.002	36	19.5	1.154	36	9.4	0.601	36	34.2	1.041	37	16	0.572	36	45.5	0.566
Q99848	Probable rRNA-processing protein EBP2 OS=Homo sapiens GN=EBNA1BP2 PE=1 SV=2 - [EBP2_HUMAN]	0.9379	4	32	61	532	0.795	70	33.6	0.771	71	31.8	1.938	72	45.6	0.742	71	35.2	2.499	72	64.7	2.125	72	51.6	3.19	72	71.1	2.895	72	80.5	3.669	72	65.1	0.865	70	31.3	0.731	69	39	2.032	70	47.6	0.803	69	30.4	2.47	70	50.7	2.03
Q9H3U1-2	Isoform 2 of Protein unc-45 homolog A OS=Homo sapiens GN=UNC45A - [UN45A_HUMAN]	0.7513	6	32	81	308	0.999	28	14.7	0.997	27	14	0.674	27	49.2	1.004	28	17.7	0.703	27	53.3	0.657	27	45.4	0.655	24	73.8	0.606	26	66.6	0.508	26	114.8	1.041	25	20.1	1.017	25	20	0.698	24	50.9	1.103	25	20.6	0.715	25	65.5	0.833
Q9NSE4	Isoleucine--tRNA ligase, mitochondrial OS=Homo sapiens GN=IARS2 PE=1 SV=2 - [SYIM_HUMAN]	0.5909	2	32	71	415	0.976	41	15.6	0.967	41	12.5	0.741	41	43.2	1.004	41	15.7	0.623	38	64.7	0.621	40	36.1	0.729	37	92	0.55	37	118.8	0.589	37	106.9	0.981	41	17.7	0.921	41	13.9	0.674	40	41	0.985	41	23.1	0.551	39	50.2	0.645
Q9NZI8	Insulin-like growth factor 2 mRNA-binding protein 1 OS=Homo sapiens GN=IGF2BP1 PE=1 SV=2 - [IF2B1_HUMAN]	0.7366	3	32	72	436	1.051	41	17.8	1.105	41	10.9	0.798	41	48.6	1.054	41	16.2	0.774	40	46.8	0.741	41	52.9	0.868	40	94.7	0.861	39	80.7	0.903	39	90.9	1.014	43	16.4	1.117	43	14	0.822	43	44.2	1.087	43	15	0.897	43	59.6	0.848
Q9Y2L1	Exosome complex exonuclease RRP44 OS=Homo sapiens GN=DIS3 PE=1 SV=2 - [RRP44_HUMAN]	0.7495	8	32	83	386	0.979	39	29.6	1.002	39	17.4	1.456	38	35.2	0.944	39	22.3	1.626	37	35.3	1.594	39	29.2	2.166	39	44.3	1.781	36	55.6	1.588	37	57.6	0.902	34	23.2	0.86	35	28.6	1.309	35	29	0.935	34	26.1	1.477	34	37.2	1.641
B2RWN5	HEAT repeat containing 1 OS=Homo sapiens GN=HEATR1 PE=2 SV=1 - [B2RWN5_HUMAN]	0.6073	10	32	136	395	0.779	26	15.9	0.756	24	13.8	1.084	26	37.5	0.787	27	22.8	1.85	28	46	1.836	27	39.2	1.332	24	52.5	1.266	24	66.9	1.496	25	59.6	0.902	19	15.6	0.625	19	59.6	1.171	21	29.1	0.862	22	40.3	2.101	21	55.6	2.534
A0A087WT20	DDB1- and CUL4-associated factor 13 OS=Homo sapiens GN=DCAF13 PE=1 SV=1 - [A0A087WT20_HUMAN]	0.8643	6	32	66	318	0.939	35	20.7	0.886	34	21.3	1.992	35	51.8	0.912	34	16.1	2.202	35	70.8	2.112	35	67.4	3.47	34	106.7	3.356	35	81.2	4.232	35	95.5	1.005	33	14.4	0.955	33	15	1.648	33	31.1	0.983	33	15	2.122	33	54.1	1.969
A0A087WYS1	UTP--glucose-1-phosphate uridylyltransferase OS=Homo sapiens GN=UGP2 PE=1 SV=1 - [A0A087WYS1_HUMAN]	0.9114	16	31	63	376	1.014	42	14.4	1.113	42	16	0.571	40	72.1	1.023	42	19.9	0.549	39	77.4	0.622	40	58.5	0.528	38	80.3	0.471	33	103.7	0.511	34	83.9	1.026	39	12.5	1.125	39	13.3	0.539	38	60.8	1.02	39	14.7	0.657	35	71	0.553
O43776	Asparagine--tRNA ligase, cytoplasmic OS=Homo sapiens GN=NARS PE=1 SV=1 - [SYNC_HUMAN]	0.6971	14	31	52	299	1.008	42	22.7	1.143	42	10.8	0.647	39	54.1	1.043	42	17.6	0.611	39	77.7	0.655	40	52.8	0.578	38	82.3	0.549	37	57.5	0.62	38	71.8	1.099	42	14.9	1.116	42	13	0.548	40	66.6	1.067	42	20.3	0.566	36	73.1	0.531
O60231	Putative pre-mRNA-splicing factor ATP-dependent RNA helicase DHX16 OS=Homo sapiens GN=DHX16 PE=1 SV=2 - [DHX16_HUMAN]	0.6177	9	31	83	383	0.956	29	17.6	0.824	29	15.3	1.686	29	33	0.844	29	18.7	1.837	29	38.8	1.709	29	30.5	1.563	28	58	1.461	29	66	1.29	28	71.4	0.856	30	23.4	0.87	29	19.6	1.605	30	35.4	0.907	29	23.9	1.86	30	26.9	1.887
O60506	Heterogeneous nuclear ribonucleoprotein Q OS=Homo sapiens GN=SYNCRIP PE=1 SV=2 - [HNRPQ_HUMAN]	0.87	13	31	90	802	0.92	55	30.3	0.902	54	15.8	1.481	55	42.7	0.916	54	34	1.494	53	53.4	1.405	54	35.8	1.278	53	94.8	1.17	54	107.9	1.313	53	87.4	0.858	48	32.4	0.899	47	20.7	1.442	48	59	0.859	48	30.2	1.519	48	48.5	1.368
O75367-2	Isoform 1 of Core histone macro-H2A.1 OS=Homo sapiens GN=H2AFY - [H2AY_HUMAN]	0.7751	9	31	48	385	0.825	55	33.8	0.783	54	33.7	2.225	55	47.4	0.797	54	43.6	2.513	55	61.1	2.234	55	55.5	2.253	55	83.8	2.012	55	82.1	1.722	55	59	0.849	59	28.1	0.765	58	36.9	2.167	59	49.1	0.815	58	34.4	2.587	59	59.2	2.44
O76094	Signal recognition particle subunit SRP72 OS=Homo sapiens GN=SRP72 PE=1 SV=3 - [SRP72_HUMAN]	0.8256	8	31	67	364	1.017	33	14.8	0.96	33	10	0.916	33	29.9	0.995	33	15.8	1.039	33	37	0.958	33	34.8	0.796	32	52.6	0.82	30	65.2	0.81	30	46.2	1.061	33	11.1	1.018	32	16.1	1.047	33	36.5	1.021	32	15.2	1.114	31	39.7	1.06
O95340	Bifunctional 3'-phosphoadenosine 5'-phosphosulfate synthase 2 OS=Homo sapiens GN=PAPSS2 PE=1 SV=2 - [PAPS2_HUMAN]	0.8664	4	31	62	322	0.979	34	27.6	1.123	35	27.9	0.874	32	74.6	1.018	35	30.3	0.714	32	97.5	0.748	31	79.4	0.719	27	108.9	0.599	25	128.6	0.618	28	142.2	1.078	41	30.3	1.059	41	20.9	0.691	39	84.2	0.993	39	21.4	0.734	38	107.4	0.702
P24752	Acetyl-CoA acetyltransferase, mitochondrial OS=Homo sapiens GN=ACAT1 PE=1 SV=1 - [THIL_HUMAN]	0.9368	5	31	49	493	0.966	49	15.4	1.013	49	13.5	0.65	48	64.4	0.986	49	20.5	0.661	43	66	0.629	46	65.9	0.658	42	74.9	0.58	41	70.7	0.632	40	61.4	0.957	57	25.6	1.028	57	13.8	0.731	54	48.5	0.984	57	19.2	0.606	53	67.6	0.691
P35269	General transcription factor IIF subunit 1 OS=Homo sapiens GN=GTF2F1 PE=1 SV=2 - [T2FA_HUMAN]	0.7137	7	31	64	362	0.933	43	17.5	0.984	43	20	1.643	43	41.8	0.955	43	19.5	1.809	43	74.7	1.574	43	47.6	2.329	43	82.7	2.485	43	79.6	2.153	43	86.6	0.963	42	18.4	0.935	42	14	1.696	42	50.4	0.971	42	17.6	1.806	42	64.1	1.718
P38919	Eukaryotic initiation factor 4A-III OS=Homo sapiens GN=EIF4A3 PE=1 SV=4 - [IF4A3_HUMAN]	0.9684	2	31	53	559	0.88	70	26.7	0.916	70	22	1.66	70	52.7	0.897	71	27.4	1.752	70	60.3	1.577	69	45	1.423	65	66.1	1.401	66	72.9	1.34	65	70.4	0.932	68	31.2	0.85	68	22.6	1.758	69	61	0.89	69	25.8	1.876	67	52.4	1.563
P40222	Alpha-taxilin OS=Homo sapiens GN=TXLNA PE=1 SV=3 - [TXLNA_HUMAN]	0.9615	2	31	76	363	1.107	30	21.2	1.197	30	26.1	0.799	28	51.2	1.118	30	22.1	0.857	30	61	0.708	30	74.9	0.976	25	61.3	0.755	24	87	0.777	25	69.4	1.074	33	14.9	1.152	32	20	0.899	33	37	1.131	33	22.6	0.843	30	52.6	0.864
P45974-2	Isoform Short of Ubiquitin carboxyl-terminal hydrolase 5 OS=Homo sapiens GN=USP5 - [UBP5_HUMAN]	0.7186	3	31	56	357	1.104	48	17.4	1.141	47	15.4	0.617	47	76.1	1.109	48	15.5	0.481	44	90.5	0.626	45	50.8	0.67	41	80.3	0.709	41	84.8	0.697	40	65.4	1.034	44	21.7	1.149	44	14.2	0.736	43	68.6	1.068	44	26.1	0.739	38	63.4	0.682
P48634	Protein PRRC2A OS=Homo sapiens GN=PRRC2A PE=1 SV=3 - [PRC2A_HUMAN]	0.6565	7	31	133	419	1.051	27	20.8	1.114	27	7.7	0.982	27	36.7	1.053	27	15.8	0.958	27	51.7	0.959	27	51.7	1.094	27	34.4	1.124	27	52.2	1.032	27	56.8	1.006	30	18.9	1.093	30	21.4	1.04	30	39.6	1.081	29	9.6	1.003	30	41.8	0.982
P63244	Receptor of activated protein C kinase 1 OS=Homo sapiens GN=RACK1 PE=1 SV=3 - [RACK1_HUMAN]	0.9811	26	31	40	598	0.993	81	23.1	1.067	80	12.7	0.828	79	72.1	1.013	81	21.5	0.848	79	96.6	0.909	79	73	0.903	75	101.3	0.873	78	102.7	0.827	75	97.7	0.943	78	24.9	1.061	78	15.5	0.872	76	73.8	1.024	78	24.3	0.901	76	89.3	0.817
Q15020	Squamous cell carcinoma antigen recognized by T-cells 3 OS=Homo sapiens GN=SART3 PE=1 SV=1 - [SART3_HUMAN]	0.6771	18	31	84	330	1.014	27	14.3	0.983	27	16.9	1.211	27	41.6	1.012	27	14.1	1.358	27	54.4	1.285	27	42.9	1.324	27	69.2	1.285	27	77.1	1.086	27	64.7	0.998	32	14.4	0.976	32	13.3	1.304	32	27.8	0.961	32	13	1.3	32	54.4	1.374
Q92917	G patch domain and KOW motifs-containing protein OS=Homo sapiens GN=GPKOW PE=1 SV=2 - [GPKOW_HUMAN]	0.8887	1	31	57	318	0.944	42	22.9	0.945	43	18.1	1.644	43	48.8	0.927	42	33.5	1.801	43	49.4	1.656	41	43.6	1.455	41	32.2	1.443	38	56.7	1.518	38	51	0.913	45	23.6	0.947	45	22.8	1.527	45	52	1.026	45	16.2	1.546	45	51.5	1.48
Q9NTI5	Sister chromatid cohesion protein PDS5 homolog B OS=Homo sapiens GN=PDS5B PE=1 SV=1 - [PDS5B_HUMAN]	0.6945	7	31	131	476	0.741	28	32.7	0.573	28	59.6	2.132	28	40.7	0.682	28	40.1	2.769	28	74.1	2.942	28	55.3	2.725	28	48.7	2.018	28	37.6	1.91	28	58.7	0.771	26	19.4	0.696	26	37.8	1.792	27	51	0.737	26	29.7	2.671	27	80.7	2.375
Q9NY61	Protein AATF OS=Homo sapiens GN=AATF PE=1 SV=1 - [AATF_HUMAN]	0.7054	10	31	53	414	0.961	60	25.6	0.949	58	28.8	1.87	60	74.8	0.917	60	24.3	2.009	60	79.9	1.952	59	73.6	3.345	59	110.9	3.401	60	91.7	3.288	60	101.1	0.924	64	29.1	0.921	64	34.8	1.794	62	46.9	0.922	65	22.4	2.104	65	60	1.828
Q9Y3I0	tRNA-splicing ligase RtcB homolog OS=Homo sapiens GN=RTCB PE=1 SV=1 - [RTCB_HUMAN]	0.8554	4	31	54	369	1.006	52	15.2	1.016	52	14.5	1.251	52	30.8	0.965	52	19.3	1.258	52	35.4	1.09	51	28.5	1.202	50	56.5	1.154	49	57.7	1.014	51	68.7	0.968	45	21.8	1.016	45	14.2	1.241	45	51.4	0.961	44	19.4	1.371	44	42.7	1.202
Q9Y4B5	Microtubule cross-linking factor 1 OS=Homo sapiens GN=MTCL1 PE=1 SV=5 - [MTCL1_HUMAN]	0.6394	5	31	153	429	0.989	25	13	1.036	25	11	1.433	25	42.9	1.006	25	12.2	1.608	25	49.7	1.448	25	51.7	1.337	25	67.9	1.535	25	98.8	1.246	25	95.6	0.889	22	16.5	0.973	22	10.1	1.486	22	51.7	0.96	22	27.5	1.742	22	68.6	1.593
A0A087WUK2	Heterogeneous nuclear ribonucleoprotein D-like OS=Homo sapiens GN=HNRNPDL PE=1 SV=1 - [A0A087WUK2_HUMAN]	0.9256	6	31	66	447	0.802	52	34.2	0.698	52	40.6	2.175	52	74.9	0.788	52	48.7	2.849	52	81.2	2.398	52	67.8	2.239	51	126.4	2.14	51	123.5	2.276	52	149.6	0.868	48	24.9	0.792	46	27.5	2.237	48	75.3	0.837	48	35.4	2.646	48	98.6	2.103
B0UZZ8	Chromosome 6 open reading frame 11 OS=Homo sapiens GN=WDR46 PE=2 SV=1 - [B0UZZ8_HUMAN]	0.7787	9	30	61	347	0.931	40	37.6	0.855	44	37.6	2.206	44	67.3	0.847	43	31	2.307	46	51.2	1.938	45	66.3	3.295	46	75.5	2.881	46	89.6	2.781	46	73.3	0.899	47	40.4	0.864	46	46.1	1.986	48	47.2	0.803	46	42.5	2.171	47	61.7	2.03
O14980	Exportin-1 OS=Homo sapiens GN=XPO1 PE=1 SV=1 - [XPO1_HUMAN]	0.6489	13	30	75	390	1.021	39	20.4	0.999	39	21.4	0.745	37	50.6	1.01	38	17.7	0.852	36	45.2	0.865	39	36.8	0.661	34	56.2	0.601	35	69.8	0.609	33	80.7	0.981	40	23.2	0.982	40	13.8	0.695	38	45	0.949	39	26	0.77	37	48	0.899
O43719	HIV Tat-specific factor 1 OS=Homo sapiens GN=HTATSF1 PE=1 SV=1 - [HTSF1_HUMAN]	0.7298	4	30	78	356	0.868	31	27.3	0.87	31	26.9	1.793	31	54.2	0.815	31	20.7	1.802	31	60.7	1.827	31	42.8	1.915	31	102.5	2.09	31	93.2	1.963	31	87.6	0.866	43	26.6	0.862	43	29.5	1.874	43	55.4	0.927	43	30.7	2.182	43	58.7	2.243
O75694	Nuclear pore complex protein Nup155 OS=Homo sapiens GN=NUP155 PE=1 SV=1 - [NU155_HUMAN]	0.596	5	30	79	307	1.085	25	17.2	0.88	26	20.2	1.294	25	31.6	0.984	26	15.3	1.607	25	52.4	1.8	26	39.3	1.299	23	65	1.262	22	54.9	1.223	22	65.9	1.026	26	26.2	0.894	26	25.5	1.226	26	51.4	0.993	26	38	1.471	26	47	1.646
P07195	L-lactate dehydrogenase B chain OS=Homo sapiens GN=LDHB PE=1 SV=2 - [LDHB_HUMAN]	0.7455	13	30	45	960	1.138	116	31.8	1.191	116	15.3	0.43	108	67.3	1.144	116	22.8	0.377	94	97.1	0.396	103	69.8	0.382	90	93.2	0.398	81	75.2	0.349	83	94.5	1.131	116	27.8	1.174	114	15.8	0.435	104	61.7	1.123	115	21.8	0.41	97	79.7	0.457
P07954-2	Isoform Cytoplasmic of Fumarate hydratase, mitochondrial OS=Homo sapiens GN=FH - [FUMH_HUMAN]	0.9015	19	30	52	563	1.012	65	17.3	1.042	65	13.1	0.78	64	50.4	1.048	65	21	0.654	65	69	0.716	64	48.2	0.687	61	71.8	0.711	58	74.3	0.736	60	67.3	1.017	62	18.8	1.04	62	8.6	0.77	62	36.6	1.029	62	15.9	0.59	60	68.6	0.608
P18858	DNA ligase 1 OS=Homo sapiens GN=LIG1 PE=1 SV=1 - [DNLI1_HUMAN]	0.6638	12	30	71	235	0.999	31	18.2	1.063	31	9.1	0.77	31	51.9	1.021	31	15.7	0.94	29	62.3	0.943	29	41.2	0.805	29	52.7	0.737	28	67.5	0.855	28	64.4	1.052	28	19.5	1.067	28	12.2	0.803	27	29.4	1.022	28	19.3	0.889	26	19.8	0.813
P23396	40S ribosomal protein S3 OS=Homo sapiens GN=RPS3 PE=1 SV=2 - [RS3_HUMAN]	0.9424	17	30	37	440	1.003	69	15.5	1.05	69	13.4	0.698	68	76	1.022	69	21.5	0.668	66	80.8	0.694	67	57.8	0.695	62	79.3	0.684	60	95	0.611	63	90.6	0.974	71	17.4	1.05	71	14.8	0.734	68	59.9	1.028	71	17.4	0.719	68	70	0.81
P28331-2	Isoform 2 of NADH-ubiquinone oxidoreductase 75 kDa subunit, mitochondrial OS=Homo sapiens GN=NDUFS1 - [NDUS1_HUMAN]	0.8529	8	30	59	279	1.055	34	17.9	0.981	34	14	0.754	34	39.8	0.99	34	18.7	0.704	31	45.2	0.684	32	43.3	0.666	29	56.2	0.651	31	47	0.564	31	61.1	1.016	34	21.9	0.956	33	22.6	0.825	33	36.7	0.989	34	24.2	0.714	30	48.7	0.848
P42166	Lamina-associated polypeptide 2, isoform alpha OS=Homo sapiens GN=TMPO PE=1 SV=2 - [LAP2A_HUMAN]	0.7738	9	30	76	604	0.814	45	24	0.747	45	39.4	2.221	45	39.6	0.831	45	39.2	2.312	45	74.1	2.038	45	51.9	2.439	45	76.4	2.39	45	74.7	2.211	45	65.1	0.851	51	23.6	0.875	50	35.7	2.081	50	77.5	0.881	50	20.9	2.316	50	74.6	1.932
P42696	RNA-binding protein 34 OS=Homo sapiens GN=RBM34 PE=1 SV=2 - [RBM34_HUMAN]	0.9163	5	30	74	364	0.903	37	31.1	0.844	37	19.3	1.711	36	47.2	0.809	37	30.2	2.013	37	60	1.899	37	53.1	2.9	37	65.7	3.001	37	63.2	3.489	37	75.2	0.841	38	30.3	0.819	38	29.4	2.216	38	54.1	0.83	38	24.1	2.597	37	51.8	2.322
P46060	Ran GTPase-activating protein 1 OS=Homo sapiens GN=RANGAP1 PE=1 SV=1 - [RAGP1_HUMAN]	0.7462	9	30	50	438	0.925	55	21	0.971	55	22	1.434	55	40.1	0.958	55	17.4	1.504	53	52.8	1.389	54	47	1.04	51	59.8	0.975	48	65.5	1.035	46	67.2	0.93	50	24.1	0.877	50	20.3	1.465	50	45.8	0.894	50	19	1.573	48	46.2	1.615
P62333	26S protease regulatory subunit 10B OS=Homo sapiens GN=PSMC6 PE=1 SV=1 - [PRS10_HUMAN]	0.928	10	30	49	285	1.061	39	18.9	1.086	39	14.6	0.719	38	66.3	1.053	39	15.9	0.729	38	62.4	0.777	38	61.7	0.715	38	72	0.726	38	103.4	0.918	38	91.1	1.097	39	22.7	1.115	39	17.3	0.791	39	35.1	1.078	39	16.1	0.692	37	44.4	0.838
Q16513	Serine/threonine-protein kinase N2 OS=Homo sapiens GN=PKN2 PE=1 SV=1 - [PKN2_HUMAN]	0.8089	11	30	98	439	0.987	30	22.9	0.993	30	22.2	0.844	28	38.4	0.983	29	18	0.848	28	56	0.839	28	36.3	0.827	27	55.3	0.836	28	95.7	0.881	26	82	1.083	34	13.6	1.063	34	18.9	0.86	33	58.9	1.062	34	22.8	0.676	33	54.3	0.783
Q1ED39	Lysine-rich nucleolar protein 1 OS=Homo sapiens GN=KNOP1 PE=1 SV=1 - [KNOP1_HUMAN]	0.8581	4	30	58	273	0.892	34	17.2	0.898	34	15.6	1.978	34	59.8	0.873	34	12.6	2.168	34	54.7	1.965	34	54.2	3.001	34	80	3.186	34	85	3.373	34	90.1	0.873	34	32.5	0.954	33	27.5	2.109	34	49.8	0.913	34	27.1	2.256	34	66.6	1.978
Q5VZU9	Tripeptidyl-peptidase 2 OS=Homo sapiens GN=TPP2 PE=1 SV=1 - [Q5VZU9_HUMAN]	0.5721	3	30	67	248	1.085	28	24.2	1.062	28	17.8	0.961	27	59.2	0.996	28	20.7	1.234	26	75.6	0.985	27	46.7	1.052	27	100.9	1.178	26	81	1.195	24	70.6	1.112	28	24.2	1.077	28	18.7	0.873	28	28.3	1.109	28	17.2	0.913	27	49.2	0.847
Q6P1J9	Parafibromin OS=Homo sapiens GN=CDC73 PE=1 SV=1 - [CDC73_HUMAN]	0.8512	5	30	68	295	0.826	37	22.8	0.851	36	18	1.766	37	36.5	0.894	36	26.7	1.988	37	45.9	1.991	37	32.7	1.771	37	61	1.617	35	61.2	1.492	36	31.8	0.825	36	28.6	0.81	35	28.1	1.888	35	56	0.856	37	25.8	2.172	35	56.8	1.88
Q8N163	Cell cycle and apoptosis regulator protein 2 OS=Homo sapiens GN=CCAR2 PE=1 SV=2 - [CCAR2_HUMAN]	0.6609	19	30	68	371	1.014	38	17.1	0.96	38	14.3	1.207	37	56.9	0.979	38	18.4	1.256	36	60.2	1.259	37	57.3	1.21	34	86.8	1.236	35	102.4	1.174	35	112.3	1.033	42	19.8	1.03	42	12.5	1.17	42	49.7	0.976	42	17.8	1.314	42	57.8	1.234
Q8N7H5	RNA polymerase II-associated factor 1 homolog OS=Homo sapiens GN=PAF1 PE=1 SV=2 - [PAF1_HUMAN]	0.8211	5	30	61	311	0.915	30	15.7	0.919	30	18.1	1.885	30	20.9	0.953	30	23.3	2.015	30	38.8	1.797	30	34.6	2.295	30	40	1.854	29	30.5	2.098	29	35.1	0.89	32	16	0.955	32	20.9	1.676	33	33	0.938	33	23.5	1.942	33	30.3	1.767
Q99729-3	Isoform 3 of Heterogeneous nuclear ribonucleoprotein A/B OS=Homo sapiens GN=HNRNPAB - [ROAA_HUMAN]	0.7439	9	30	49	668	0.823	76	33.6	0.805	76	32.9	2.744	76	43.8	0.789	76	30.3	3.148	76	61	2.725	76	51.7	2.63	76	95.5	2.403	74	90	2.651	75	80.5	0.816	82	34.9	0.748	81	36.4	2.914	83	58	0.742	82	30.5	3.418	83	75.6	2.781
Q9H9A6	Leucine-rich repeat-containing protein 40 OS=Homo sapiens GN=LRRC40 PE=1 SV=1 - [LRC40_HUMAN]	0.789	1	30	64	302	1.071	34	18.6	1.096	34	16.8	0.615	34	38.5	1.044	34	14.9	0.497	34	58.6	0.629	34	43.6	0.626	32	73.4	0.544	29	54.8	0.572	31	74.3	1.08	38	19.8	1.066	38	12.7	0.631	38	66.3	1.063	38	14.7	0.61	37	56.4	0.629
Q9P2I0	Cleavage and polyadenylation specificity factor subunit 2 OS=Homo sapiens GN=CPSF2 PE=1 SV=2 - [CPSF2_HUMAN]	0.7417	6	30	57	265	0.884	34	25.2	0.88	34	30.6	1.655	34	46.1	0.965	34	26.3	1.908	34	62.6	1.707	34	34.8	1.671	34	65.2	1.805	32	83	1.506	33	46.8	0.912	26	18.4	0.872	26	26	1.872	26	50.8	0.958	26	23.4	1.82	26	50.4	1.935
Q9UPT8	Zinc finger CCCH domain-containing protein 4 OS=Homo sapiens GN=ZC3H4 PE=1 SV=3 - [ZC3H4_HUMAN]	0.581	2	30	88	396	0.84	38	29.3	0.886	39	19.2	2.478	40	58.1	0.861	39	29	2.742	40	84.7	2.487	40	66.6	2.455	40	70.4	2.282	40	64.3	2.737	40	60.3	0.833	40	22.6	0.798	38	22.6	2.354	40	58.5	0.881	38	19.7	2.555	40	71.6	2.231
Q9Y263	Phospholipase A-2-activating protein OS=Homo sapiens GN=PLAA PE=1 SV=2 - [PLAP_HUMAN]	0.7849	5	30	68	278	0.995	23	10.6	1.042	24	18.9	0.827	23	58.2	0.97	24	12.4	0.837	23	66.4	0.895	23	51.6	0.894	22	69.7	0.944	23	71	0.767	23	86.6	0.994	31	11.3	1.023	31	8.9	0.868	30	63.1	1.03	31	18.3	0.858	30	86.1	0.888
A8K139	cDNA FLJ76744, highly similar to Homo sapiens L1 cell adhesion molecule (L1CAM), transcript variant 1, mRNA OS=Homo sapiens PE=2 SV=1 - [A8K139_HUMAN]	0.6468	16	30	87	384	1.011	41	18.3	1.079	41	18.9	0.84	40	43.8	1.09	41	22.5	1.001	38	36.9	0.814	39	53.3	1.006	39	77.8	0.95	38	68.2	0.858	39	79.4	1	36	17.2	1.029	36	21.1	0.827	34	41.3	1.093	36	18.9	0.882	33	41.7	0.834
Q8N4P8	GTPBP4 protein (Fragment) OS=Homo sapiens GN=GTPBP4 PE=2 SV=1 - [Q8N4P8_HUMAN]	0.818	7	30	96	583	0.796	53	24.2	0.744	53	28.3	2.751	53	41.3	0.844	53	28.4	3.535	54	46	3.3	54	46.3	4.815	55	80.5	5.664	54	84.3	5.346	54	78.2	0.887	48	33.8	0.861	47	25.8	2.441	51	56.2	0.854	48	31.6	3.066	51	70.9	2.678
B3KY12	cDNA FLJ46581 fis, clone THYMU3043200, highly similar to Splicing factor 3A subunit 3 OS=Homo sapiens PE=2 SV=1 - [B3KY12_HUMAN]	0.8563	6	30	60	382	0.844	46	34.6	0.78	46	32	2.184	46	49.4	0.856	46	32.5	2.343	46	51.3	2.19	46	49.9	2.052	46	50.6	1.884	45	53.5	1.82	45	48.7	0.865	47	27.3	0.776	46	29.6	2.239	47	44.4	0.83	46	24.1	2.167	47	52.9	2.327
A8K2T7	Receptor protein-tyrosine kinase OS=Homo sapiens PE=2 SV=1 - [A8K2T7_HUMAN]	0.7702	39	30	79	282	1.139	30	14.5	0.967	31	16.1	0.751	30	38.8	1.018	31	15	0.714	28	60.7	0.742	29	31.1	0.757	26	74.6	0.719	26	69.7	0.755	28	94.4	1.111	25	30	0.936	24	20.3	0.721	23	34.4	0.988	24	15.1	0.663	23	87.4	0.697
B4DMD3	cDNA FLJ58174, highly similar to WW domain-binding protein 11 OS=Homo sapiens PE=2 SV=1 - [B4DMD3_HUMAN]	0.7691	5	30	70	303	0.85	31	19.2	0.849	30	19.3	1.915	31	30.7	0.886	30	19.4	2.123	31	34.8	1.919	31	32.5	2.031	30	54.1	1.98	31	67.7	1.97	31	50.5	0.934	34	25.3	0.871	34	15.8	1.635	34	45.7	0.876	34	30.6	1.972	33	39.3	1.758
A8MXP9	Matrin-3 OS=Homo sapiens GN=MATR3 PE=1 SV=1 - [A8MXP9_HUMAN]	0.7899	24	29	104	1177	0.836	64	24.8	0.763	64	36.3	1.921	65	80.8	0.827	64	32.8	2.051	65	77.5	1.916	66	60.9	1.846	62	78.2	1.542	58	74	1.824	61	79.4	0.838	72	33	0.793	72	36.3	2.007	72	57.1	0.84	72	29.3	1.961	72	63.2	1.834
O60341	Lysine-specific histone demethylase 1A OS=Homo sapiens GN=KDM1A PE=1 SV=2 - [KDM1A_HUMAN]	0.6678	5	29	60	246	0.93	29	27.4	0.864	28	24.7	1.476	29	34.5	0.937	29	25.5	1.592	27	27.1	1.561	28	29.6	1.436	27	45.2	1.293	25	54.8	1.168	26	67.6	0.893	25	25.3	0.887	25	22.6	1.564	24	41.9	0.932	25	24.3	1.747	24	30.7	1.512
O75152	Zinc finger CCCH domain-containing protein 11A OS=Homo sapiens GN=ZC3H11A PE=1 SV=3 - [ZC11A_HUMAN]	0.8556	5	29	103	529	0.846	29	34.6	0.804	29	20.2	2.103	29	42.6	0.792	29	33.4	2.48	29	49.9	2.068	29	40.8	2.149	28	46	1.963	28	56.3	2.143	28	47.8	0.832	29	23.2	0.853	28	33.2	2.147	29	64.5	0.858	29	34.6	2.484	29	69.2	2.172
O95831-3	Isoform 3 of Apoptosis-inducing factor 1, mitochondrial OS=Homo sapiens GN=AIFM1 - [AIFM1_HUMAN]	0.6601	9	29	48	318	1.072	35	18.3	0.945	35	17.4	0.797	33	35.1	1.051	35	11.7	0.665	33	78.4	0.772	33	30.5	0.608	32	70.4	0.557	32	72.9	0.709	33	78.5	1.054	37	13.8	1.007	37	12.8	0.913	37	41.5	1.04	37	14.1	0.851	36	43.7	0.811
P00966	Argininosuccinate synthase OS=Homo sapiens GN=ASS1 PE=1 SV=2 - [ASSY_HUMAN]	0.8689	9	29	49	263	1.082	35	20	1.179	35	12.5	0.48	34	68.2	1.11	35	20.4	0.45	32	66.4	0.563	33	59.7	0.6	30	55.2	0.493	31	91.6	0.547	30	87.1	1.137	33	22.8	1.203	33	11.8	0.645	31	77.8	1.101	33	23	0.53	30	97.9	0.576
P08240	Signal recognition particle receptor subunit alpha OS=Homo sapiens GN=SRPRA PE=1 SV=2 - [SRPRA_HUMAN]	0.6897	6	29	61	223	0.961	19	14.4	0.789	19	18.8	0.834	18	33.4	0.891	19	14.9	0.844	18	33.8	0.932	18	31.3	0.711	18	82	0.794	18	81.9	0.618	18	69.7	0.97	28	18.5	0.805	28	12	0.939	28	36.6	0.942	28	13.4	0.946	28	45.5	1.048
P35998	26S protease regulatory subunit 7 OS=Homo sapiens GN=PSMC2 PE=1 SV=3 - [PRS7_HUMAN]	0.9099	5	29	54	373	1.073	41	22.2	1.111	41	11.6	0.651	40	50.2	1.097	41	18.7	0.54	39	70.2	0.634	41	70.3	0.571	36	78.9	0.544	34	70.4	0.567	37	86.3	1.035	46	24.4	1.125	46	15	0.759	43	65.8	1.039	46	22.3	0.555	41	88.3	0.703
P39748	Flap endonuclease 1 OS=Homo sapiens GN=FEN1 PE=1 SV=1 - [FEN1_HUMAN]	0.9105	4	29	53	460	0.971	58	27.1	0.992	58	12.5	1.419	58	51.3	1.031	58	21.8	1.529	57	61.1	1.292	58	55	1.218	58	75.1	1.133	55	72.8	1.104	57	69.7	0.95	55	24.8	0.991	55	15.6	1.319	55	50.5	0.97	55	21.3	1.447	55	75.4	1.233
P54578	Ubiquitin carboxyl-terminal hydrolase 14 OS=Homo sapiens GN=USP14 PE=1 SV=3 - [UBP14_HUMAN]	0.8785	9	29	57	374	0.918	39	22.2	1.036	39	15.6	0.657	39	86.9	0.989	38	12.6	0.634	38	98.6	0.68	39	70.3	0.748	35	71	0.601	35	69.6	0.667	35	114.4	0.97	41	19.9	1.077	42	13.1	0.644	41	77.5	1.037	41	26.2	0.675	40	106.2	0.641
P62191	26S protease regulatory subunit 4 OS=Homo sapiens GN=PSMC1 PE=1 SV=1 - [PRS4_HUMAN]	0.9114	4	29	55	358	1.06	45	18.9	1.118	45	16.6	0.648	43	51.1	1.099	45	21.8	0.556	41	45.4	0.647	42	43.4	0.584	38	59.4	0.616	36	52.9	0.596	38	46.2	1.043	43	23.2	1.14	43	17.3	0.572	40	65.2	1.037	43	27.4	0.608	34	91.5	0.635
Q10570	Cleavage and polyadenylation specificity factor subunit 1 OS=Homo sapiens GN=CPSF1 PE=1 SV=2 - [CPSF1_HUMAN]	0.5932	6	29	95	324	0.858	22	33.9	0.761	22	26	1.472	23	49.2	0.758	23	22.6	2.005	23	64	1.878	23	57.2	1.837	18	78.9	1.233	19	130.3	1.688	17	116.3	0.924	24	32.5	0.878	24	35.7	1.506	23	53.1	0.911	24	26.8	1.863	23	74.4	2.083
Q14151	Scaffold attachment factor B2 OS=Homo sapiens GN=SAFB2 PE=1 SV=1 - [SAFB2_HUMAN]	0.7723	8	29	108	532	0.859	30	28.2	0.836	30	31.3	2.427	30	61.7	0.82	30	31.3	2.285	30	60.2	2.023	30	40.5	1.963	30	58.3	2.01	30	59.3	1.969	30	57	0.837	32	25.3	0.781	32	24.3	2.266	32	56.6	0.834	31	17.4	2.306	32	59.8	2.016
Q14202	Zinc finger MYM-type protein 3 OS=Homo sapiens GN=ZMYM3 PE=1 SV=2 - [ZMYM3_HUMAN]	0.5022	7	29	78	264	0.846	21	17.6	0.797	21	19.1	1.909	21	44.1	0.817	21	19.2	2.341	21	50.6	1.9	21	43.4	1.897	20	49.9	1.678	20	52.1	1.852	19	50.4	0.828	22	18.3	0.828	22	33.3	2.129	22	33	0.847	22	23.6	2.395	22	33.5	2.153
Q5BKZ1	DBIRD complex subunit ZNF326 OS=Homo sapiens GN=ZNF326 PE=1 SV=2 - [ZN326_HUMAN]	0.7131	4	29	60	530	0.82	53	20.1	0.78	53	29.6	2.545	53	45.7	0.769	53	32.8	2.773	53	54.5	2.524	53	53.3	2.624	53	60.8	2.459	53	68.5	2.554	53	78.8	0.855	47	20.5	0.802	47	27.4	2.43	47	63.5	0.829	47	19	2.902	47	63.7	2.408
Q86YP4	Transcriptional repressor p66-alpha OS=Homo sapiens GN=GATAD2A PE=1 SV=1 - [P66A_HUMAN]	0.8531	13	29	73	454	0.883	40	23	0.86	40	22.1	2.405	40	42.8	0.923	40	23.7	2.836	40	62.5	2.119	40	58.6	2.784	40	56	2.942	40	70.9	2.502	40	61.3	0.932	38	28.2	0.864	38	28	2.236	38	44.5	0.899	38	21.8	2.626	38	44.2	2.289
Q8TDN6	Ribosome biogenesis protein BRX1 homolog OS=Homo sapiens GN=BRIX1 PE=1 SV=2 - [BRX1_HUMAN]	0.9008	4	29	53	301	0.705	40	36.6	0.654	39	40.6	1.874	39	53	0.744	40	35.8	2.512	39	60.9	2.36	39	71	2.497	38	93.2	2.324	39	96.3	2.448	39	104	0.723	41	45	0.671	40	44.4	1.872	40	36.9	0.717	40	34.2	2.698	40	53.4	2.565
Q8TED0	U3 small nucleolar RNA-associated protein 15 homolog OS=Homo sapiens GN=UTP15 PE=1 SV=3 - [UTP15_HUMAN]	0.8398	5	29	60	259	0.847	30	19.9	0.898	30	30.3	1.621	31	42.6	0.888	31	25	1.841	30	73	1.598	31	48.3	2.482	30	57.1	2.397	31	76.3	2.011	31	68.4	0.868	39	28.1	0.803	38	33.1	1.825	40	34.2	0.832	39	30.5	2.022	40	63.3	1.943
Q8WXI9	Transcriptional repressor p66-beta OS=Homo sapiens GN=GATAD2B PE=1 SV=1 - [P66B_HUMAN]	0.8094	7	29	68	403	0.805	39	28	0.839	38	33	2.364	39	45.6	0.875	39	31.2	2.862	39	61.9	2.332	39	57.3	2.606	39	90.3	2.34	39	78.7	2.534	39	76.3	0.813	33	32.8	0.895	32	34.9	2.374	34	73.6	0.864	32	27.9	2.55	34	58.9	2.095
Q96T23	Remodeling and spacing factor 1 OS=Homo sapiens GN=RSF1 PE=1 SV=2 - [RSF1_HUMAN]	0.6149	9	29	103	374	0.822	29	28.2	0.739	29	30.4	2.111	29	59.9	0.783	27	23.4	2.325	29	86.9	2.001	29	75.4	2.447	29	77.9	2.099	29	86.8	2.008	29	71.9	0.789	26	32.4	0.708	26	40.9	2.508	26	72.1	0.742	26	41.9	2.736	26	71.2	2.397
Q9NQS7-2	Isoform 2 of Inner centromere protein OS=Homo sapiens GN=INCENP - [INCE_HUMAN]	0.7363	61	29	90	357	0.807	27	33.1	0.725	27	37.3	2.227	27	48.2	0.693	27	42.5	2.292	27	42.9	2.232	27	38.9	2.316	27	48.8	2.249	27	45.5	2.425	27	60.1	0.907	27	30.2	0.745	27	30.5	2.255	26	64.6	0.844	26	36	2.728	26	63.7	2.402
Q9NUQ3	Gamma-taxilin OS=Homo sapiens GN=TXLNG PE=1 SV=2 - [TXLNG_HUMAN]	0.9091	3	29	81	346	1.014	24	12.5	1.139	24	12.3	0.968	24	23.9	1.073	24	12.5	0.933	23	32.9	0.913	24	45.6	0.972	23	41	0.916	23	55.1	0.898	23	61.6	1.044	36	22.5	1.123	36	11.3	0.939	35	46.8	1.082	36	12.8	0.955	35	63.3	0.851
Q9UGI8	Testin OS=Homo sapiens GN=TES PE=1 SV=1 - [TES_HUMAN]	0.9074	11	29	49	247	1.092	26	10.8	1.134	26	8.5	0.723	26	37.3	1.069	26	13.4	0.707	24	61.9	0.75	26	60.4	0.691	23	62.9	0.71	24	38	0.655	24	44.8	1.054	26	26.1	1.129	26	10.4	0.709	24	51.2	1.138	26	11.4	0.662	24	66.3	0.694
P27824-2	Isoform 2 of Calnexin OS=Homo sapiens GN=CANX - [CALX_HUMAN]	0.5486	18	29	47	393	0.962	45	22.3	0.737	45	18.5	0.804	44	36	0.907	45	22.8	0.828	44	25.7	0.941	44	36.3	0.596	44	65.9	0.627	43	59.8	0.606	44	75.2	0.954	52	22.3	0.741	52	21.5	0.839	51	34.5	0.878	52	22.8	0.896	51	40.9	1.014
Q0VGA5	SARS protein OS=Homo sapiens GN=SARS PE=2 SV=1 - [Q0VGA5_HUMAN]	0.9276	4	29	56	310	1.016	40	18.1	1.112	39	14.1	0.557	38	65.8	1.061	40	14	0.506	37	94.6	0.574	37	67.4	0.575	33	96.8	0.632	33	101.9	0.652	33	154.6	1.018	36	20.9	1.095	37	14.2	0.588	35	73.2	1.015	37	19.7	0.496	34	60	0.582
Q9BR63	FARSB protein (Fragment) OS=Homo sapiens GN=FARSB PE=2 SV=2 - [Q9BR63_HUMAN]	0.7504	5	29	59	270	1.054	26	20.3	1.093	26	13.9	0.664	25	57.3	0.99	26	18.9	0.674	24	97.1	0.673	26	70.1	0.698	24	146.9	0.581	24	138.1	0.59	23	154.4	1.006	24	20.1	1.097	24	15	0.666	23	66.4	1.011	24	21.7	0.511	21	100.8	0.604
B2RB23	cDNA, FLJ95265, highly similar to Homo sapiens acetyl-Coenzyme A acyltransferase 2 (mitochondrial 3-oxoacyl-Coenzyme A thiolase) (ACAA2), nuclear gene encoding mitochondrial protein, mRNA OS=Homo sapiens PE=2 SV=1 - [B2RB23_HUMAN]	0.9169	8	29	46	401	1.023	48	18.5	1.012	48	14	0.885	48	62.5	1.018	48	19	0.739	46	81.1	0.653	46	63.2	0.77	44	111.1	0.778	43	84.8	0.691	42	95	0.983	49	17.1	0.969	49	16.7	0.848	49	61	0.981	49	20.9	0.659	48	106.2	0.637
F5GZS6	4F2 cell-surface antigen heavy chain OS=Homo sapiens GN=SLC3A2 PE=1 SV=1 - [F5GZS6_HUMAN]	0.7563	15	28	50	444	1.08	54	17.1	0.833	54	14.2	0.486	51	43.9	0.916	54	25.1	0.391	45	73.8	0.475	50	84.2	0.435	41	77.4	0.357	38	61.5	0.344	44	81.9	1.049	54	20.7	0.878	54	19.6	0.432	52	78.7	0.893	54	24.7	0.387	48	81.7	0.421
Q15424-2	Isoform 2 of Scaffold attachment factor B1 OS=Homo sapiens GN=SAFB - [SAFB1_HUMAN]	0.7818	15	28	121	674	0.641	42	72.5	0.775	41	84.1	2.883	43	38	0.624	41	73.1	3.251	43	26.1	2.658	42	29.3	2.556	43	59	2.219	43	48.6	2.331	43	36.1	0.689	46	61.8	0.624	46	80.8	2.809	47	46.8	0.735	46	53.3	2.989	47	58	2.895
G5E9E7	Tight junction protein 1 (Zona occludens 1), isoform CRA_e OS=Homo sapiens GN=TJP1 PE=1 SV=1 - [G5E9E7_HUMAN]	0.581	13	28	103	311	0.996	21	19	1.067	21	14.4	0.896	21	44.3	1.007	21	20.1	0.832	20	67.7	0.86	21	53.9	0.801	20	47.2	0.853	20	55.3	0.758	20	65.7	1.003	21	16.7	1.109	21	11	0.886	21	50.1	1.033	21	15.4	0.693	20	54.2	0.85
O00231	26S proteasome non-ATPase regulatory subunit 11 OS=Homo sapiens GN=PSMD11 PE=1 SV=3 - [PSD11_HUMAN]	0.8104	6	28	46	237	0.997	33	21.2	1.159	33	19.3	0.619	31	57.3	0.995	33	14.5	0.524	30	61.2	0.604	31	66	0.435	29	87	0.558	28	67	0.618	28	73.1	1.019	29	14.2	1.092	29	13.6	0.546	28	94.6	1.026	29	14.6	0.591	25	60.8	0.551
O14974	Protein phosphatase 1 regulatory subunit 12A OS=Homo sapiens GN=PPP1R12A PE=1 SV=1 - [MYPT1_HUMAN]	0.6485	20	28	84	311	1.038	25	14	1.159	25	13.5	0.826	25	46	1.027	25	16.1	0.88	25	56.3	0.992	25	36.7	1.017	25	55.8	0.819	25	59.9	0.863	25	51.8	1.027	27	17.9	1.113	27	14.2	1.008	27	34.4	1.079	27	22.8	1.011	27	55.3	0.979
O75691	Small subunit processome component 20 homolog OS=Homo sapiens GN=UTP20 PE=1 SV=3 - [UTP20_HUMAN]	0.5501	3	28	162	459	0.734	26	36	0.71	24	64.5	1.389	26	40.5	0.725	25	61.9	2.42	26	50.3	2.721	26	64.2	2.095	25	42.6	1.655	25	66.4	2.03	26	62.3	0.768	21	39.7	0.729	21	45.4	1.206	22	61.9	0.811	21	26.5	2.26	22	66.4	2.457
O94826	Mitochondrial import receptor subunit TOM70 OS=Homo sapiens GN=TOMM70 PE=1 SV=1 - [TOM70_HUMAN]	0.7928	4	28	68	321	0.993	34	15	0.968	34	13.1	0.709	34	54.9	0.987	34	14.9	0.587	34	55.3	0.683	33	38.4	0.567	33	78.8	0.545	33	83.4	0.566	32	85.2	1.054	35	14.1	1.016	35	12	0.808	35	44.5	1.006	35	18.1	0.692	34	56.5	0.675
O95453	Poly(A)-specific ribonuclease PARN OS=Homo sapiens GN=PARN PE=1 SV=1 - [PARN_HUMAN]	0.6761	8	28	60	221	0.898	30	27.6	0.905	30	21.1	1.756	30	65.6	0.901	30	21.8	1.958	30	68.2	1.875	29	66	3.804	30	85.6	4.126	30	96.1	3.695	30	101.6	0.925	24	15.9	0.92	24	16.4	1.693	24	42.1	0.903	24	21.3	1.969	24	43	1.866
P05556	Integrin beta-1 OS=Homo sapiens GN=ITGB1 PE=1 SV=2 - [ITB1_HUMAN]	0.6967	16	28	74	462	0.916	39	23	0.795	39	19.3	0.912	39	40.5	0.921	39	22.1	0.943	39	48.3	1.024	39	40.8	0.708	38	49	0.626	38	71.1	0.736	39	83.5	1.02	42	13.8	0.78	42	21.1	0.908	42	42.7	0.968	42	22.7	0.968	42	51.3	1.019
P06576	ATP synthase subunit beta, mitochondrial OS=Homo sapiens GN=ATP5B PE=1 SV=3 - [ATPB_HUMAN]	0.9093	6	28	45	930	1.041	126	21.8	1.036	125	12.4	0.85	119	44.6	1.028	125	20.3	0.637	115	80.5	0.727	115	54.4	0.638	107	94.6	0.672	103	91.2	0.67	103	87.8	1.017	125	21.2	1.017	125	15.4	0.766	122	60.7	1.011	125	19.1	0.577	114	80.8	0.579
P09960	Leukotriene A-4 hydrolase OS=Homo sapiens GN=LTA4H PE=1 SV=2 - [LKHA4_HUMAN]	0.6939	8	28	51	284	1.041	37	22.1	1.137	37	13.7	0.603	37	70.3	1.075	37	16	0.49	36	71	0.587	36	71.1	0.613	35	64.3	0.59	35	69.1	0.583	36	59.8	1.081	34	27.1	1.154	34	10.9	0.654	34	74.2	1.076	34	22.3	0.623	34	116.8	0.565
P11142	Heat shock cognate 71 kDa protein OS=Homo sapiens GN=HSPA8 PE=1 SV=1 - [HSP7C_HUMAN]	0.8282	24	28	86	2417	0.988	107	18.3	1.086	107	14.2	0.771	106	54.5	1.004	107	15.9	0.661	104	70.9	0.675	105	51.4	0.569	101	65.4	0.59	96	87.5	0.636	97	94.8	0.971	107	16.3	1.119	107	14.8	0.723	106	44.1	0.978	106	16.1	0.75	103	72.4	0.724
P16615	Sarcoplasmic/endoplasmic reticulum calcium ATPase 2 OS=Homo sapiens GN=ATP2A2 PE=1 SV=1 - [AT2A2_HUMAN]	0.5662	25	28	68	356	1.045	39	16.6	0.767	39	27.3	0.829	39	43.1	0.923	39	21	0.851	39	61.3	0.95	39	42.4	0.641	38	77.7	0.619	39	112.5	0.576	38	85.7	1.096	40	15	0.796	40	23.4	0.738	40	59.1	0.947	40	16.5	0.882	40	52.6	1.014
P17812	CTP synthase 1 OS=Homo sapiens GN=CTPS1 PE=1 SV=2 - [PYRG1_HUMAN]	0.6802	5	28	50	299	0.999	35	19.6	1.128	35	15.6	0.691	35	64.4	1.007	35	17.5	0.605	32	82.9	0.65	34	70.3	0.579	32	130	0.787	28	119.7	0.76	28	72.8	1.04	35	18.2	1.085	35	14.1	0.672	33	48.9	0.963	35	22.1	0.539	32	50.8	0.595
P17980	26S protease regulatory subunit 6A OS=Homo sapiens GN=PSMC3 PE=1 SV=3 - [PRS6A_HUMAN]	0.9818	9	28	58	378	1.089	48	19.7	1.148	48	17.4	0.634	45	53.1	1.074	48	19.5	0.56	46	87.3	0.634	46	58.6	0.597	42	100.9	0.628	42	86.2	0.588	41	93.2	1.022	49	16.5	1.133	49	12.6	0.712	46	45.7	1.098	49	24.6	0.611	44	64.9	0.71
P21796	Voltage-dependent anion-selective channel protein 1 OS=Homo sapiens GN=VDAC1 PE=1 SV=2 - [VDAC1_HUMAN]	0.9293	4	28	37	588	0.998	77	14	1.011	77	12	0.743	77	43.2	0.988	77	13.9	0.648	75	85.8	0.653	76	58.3	0.604	72	85.3	0.556	73	76.7	0.621	70	85.5	0.942	73	17.6	1.028	73	11.6	0.792	72	63.2	1.004	73	18.9	0.634	68	91.8	0.616
P31040	Succinate dehydrogenase [ubiquinone] flavoprotein subunit, mitochondrial OS=Homo sapiens GN=SDHA PE=1 SV=2 - [SDHA_HUMAN]	0.8584	15	28	56	326	1.052	37	13.9	1.009	37	11	0.868	37	41	1.066	37	13.6	0.613	36	60.7	0.701	37	51.4	0.758	33	58.6	0.694	35	57.5	0.713	34	59	1.093	38	18.7	1	37	13	0.864	37	27	1.043	37	12.8	0.733	36	29.5	0.72
P32754	4-hydroxyphenylpyruvate dioxygenase OS=Homo sapiens GN=HPD PE=1 SV=2 - [HPPD_HUMAN]	0.883	4	28	43	569	0.967	60	20.4	1.128	60	13.8	0.517	59	79.4	1.023	60	13.4	0.395	58	117.3	0.483	59	110.1	0.411	58	124.5	0.406	54	101.2	0.513	51	149.7	0.987	61	24.8	1.132	61	11.2	0.55	60	59	1.035	61	23	0.452	59	106.7	0.544
P46100	Transcriptional regulator ATRX OS=Homo sapiens GN=ATRX PE=1 SV=5 - [ATRX_HUMAN]	0.6581	19	28	218	701	0.841	20	26.6	0.879	20	24.6	2.015	20	47.5	0.877	20	26.6	2.654	20	65.7	2.371	20	48	2.573	20	68.8	2.381	20	63.2	2.486	20	93.2	0.84	16	18.7	0.882	15	18	2.025	16	117.2	0.864	16	38.3	2.35	16	149.8	1.948
P52732	Kinesin-like protein KIF11 OS=Homo sapiens GN=KIF11 PE=1 SV=2 - [KIF11_HUMAN]	0.7064	3	28	91	346	1.017	22	21.9	1.116	22	26.6	0.88	21	28.3	1.025	22	20.8	0.848	21	37.2	0.852	21	57.7	0.73	21	64.1	0.658	20	107.4	0.709	20	84.4	0.989	26	27.4	1.056	26	12.4	0.65	26	53.5	1.044	26	25.9	0.578	25	59.6	0.673
P52888	Thimet oligopeptidase OS=Homo sapiens GN=THOP1 PE=1 SV=2 - [THOP1_HUMAN]	0.7126	11	28	64	292	0.988	29	11.5	1.089	29	11.7	0.675	29	79.9	1.023	29	10.2	0.681	28	108.6	0.699	29	75.5	0.672	27	97.6	0.618	27	90.4	0.723	25	118.7	0.97	31	20.8	1.049	31	14.4	0.579	31	71.4	1.01	31	11.4	0.59	30	67.4	0.636
Q12797	Aspartyl/asparaginyl beta-hydroxylase OS=Homo sapiens GN=ASPH PE=1 SV=3 - [ASPH_HUMAN]	0.7269	25	28	70	310	0.944	28	22	0.883	28	16.8	1.172	28	39.5	0.931	28	24.8	1.14	27	45.5	1.058	28	36.9	0.759	27	39.5	0.794	27	39.1	0.762	27	46.5	1.002	32	26.8	0.872	32	25.2	1.204	32	46.9	0.947	32	27	1.341	32	63.3	1.236
Q15061	WD repeat-containing protein 43 OS=Homo sapiens GN=WDR43 PE=1 SV=3 - [WDR43_HUMAN]	0.7489	4	28	62	424	0.804	45	36.9	0.789	44	29	1.817	46	40.9	0.852	44	29.2	2.164	45	59.1	2.273	45	50.4	2.977	45	112.9	2.57	43	107.8	2.469	45	109.8	0.756	43	35.1	0.753	43	32.7	1.628	43	57.9	0.743	43	39	2.319	43	74.8	2.244
Q8IWX8	Calcium homeostasis endoplasmic reticulum protein OS=Homo sapiens GN=CHERP PE=1 SV=3 - [CHERP_HUMAN]	0.5284	5	28	61	362	0.891	37	30.2	0.741	37	46.5	2.337	36	55.3	0.876	36	25.8	2.362	36	58.7	2.271	37	53.3	2.265	34	72.4	2.007	35	55.6	1.955	35	50.1	0.887	34	34.5	0.799	33	36.8	2.673	33	46	0.939	33	32.2	2.313	34	59	2.767
Q8TCS8	Polyribonucleotide nucleotidyltransferase 1, mitochondrial OS=Homo sapiens GN=PNPT1 PE=1 SV=2 - [PNPT1_HUMAN]	0.8225	4	28	81	316	1.009	35	14	0.999	35	14.3	0.792	34	55.7	1.008	35	12.8	0.658	33	62.8	0.7	33	45.3	0.787	32	84.7	0.932	29	71.3	0.754	31	104.8	1.003	35	17.8	0.961	35	16.7	0.797	35	49.3	0.997	36	11.9	0.652	32	72.8	0.739
Q8WTT2	Nucleolar complex protein 3 homolog OS=Homo sapiens GN=NOC3L PE=1 SV=1 - [NOC3L_HUMAN]	0.6575	4	28	66	280	0.809	21	16.9	0.711	20	40.8	1.783	21	56	0.753	21	24.9	2.185	21	48.8	2.14	21	60.8	2.386	21	69.5	1.918	21	66.9	2.306	21	87.1	0.959	24	38.2	0.834	24	37.7	2.071	24	47.4	0.874	24	49.6	2.95	24	50.6	2.642
Q96N67	Dedicator of cytokinesis protein 7 OS=Homo sapiens GN=DOCK7 PE=1 SV=4 - [DOCK7_HUMAN]	0.6248	21	28	153	482	1.067	19	38.3	0.982	19	15.6	0.867	19	32	0.984	19	23.4	0.924	19	17.4	0.995	19	19.7	0.79	19	45.2	0.857	19	54.6	0.858	19	63	1.094	19	14.1	0.988	19	8.1	0.919	19	26.7	1.02	19	11	0.948	18	45.1	0.936
Q9BSJ8-2	Isoform 2 of Extended synaptotagmin-1 OS=Homo sapiens GN=ESYT1 - [ESYT1_HUMAN]	0.518	5	28	64	269	1.011	34	15.8	0.853	33	18.5	0.841	31	34.4	0.896	34	18.3	0.853	32	40.6	0.937	32	31.7	0.8	30	40.9	0.727	30	59.7	0.713	31	53	1.076	28	13	0.853	27	17.4	0.864	27	38.6	1.033	27	22.6	0.931	24	48.2	0.948
Q9H4A4	Aminopeptidase B OS=Homo sapiens GN=RNPEP PE=1 SV=2 - [AMPB_HUMAN]	0.7446	7	28	39	247	1.03	37	11.4	1.118	37	13.1	0.498	34	46.8	1.02	37	12	0.417	32	88	0.5	34	60.4	0.412	32	75	0.52	33	137.4	0.544	28	116.7	1.027	36	13	1.151	36	16.6	0.465	35	51.8	1.037	36	18.7	0.505	34	69.8	0.52
Q9HCD5	Nuclear receptor coactivator 5 OS=Homo sapiens GN=NCOA5 PE=1 SV=2 - [NCOA5_HUMAN]	0.8946	2	28	61	315	0.932	32	29.4	0.914	31	18.3	2.105	32	67.1	0.907	32	22.9	2.055	32	77.3	2.117	32	73.4	2.412	32	86.9	2.443	31	81.1	2.33	32	73.8	0.876	27	33.6	0.822	27	19.3	2.159	27	87.5	0.862	27	18.2	2.297	28	85.2	2.027
Q9NYV4-2	Isoform 2 of Cyclin-dependent kinase 12 OS=Homo sapiens GN=CDK12 - [CDK12_HUMAN]	0.6009	107	28	115	330	0.928	20	13.9	0.884	19	12.1	1.718	20	34.2	0.923	20	17.4	1.898	20	67.1	1.627	20	38.9	1.659	20	67.1	1.666	20	59.4	1.585	20	57.1	0.918	22	22.6	0.84	22	22.1	1.564	22	50.9	0.889	22	34.2	1.917	22	85.3	1.522
Q9UBT2	SUMO-activating enzyme subunit 2 OS=Homo sapiens GN=UBA2 PE=1 SV=2 - [SAE2_HUMAN]	0.7875	10	28	58	293	1.097	31	17.4	1.06	31	15.8	0.659	28	72.3	1.08	31	18.7	0.64	28	83	0.672	30	83.3	0.919	25	121.9	0.811	22	99	0.804	24	108.9	1.148	32	14.5	1.087	32	22	0.541	31	63.9	1.084	32	21.1	0.508	30	95	0.555
Q9UNF1	Melanoma-associated antigen D2 OS=Homo sapiens GN=MAGED2 PE=1 SV=2 - [MAGD2_HUMAN]	0.7145	21	28	59	291	1.079	30	18.9	1.117	30	15	0.693	30	73.7	1.047	30	18.1	0.628	29	70.9	0.728	30	73.1	0.71	29	106.7	0.591	28	88.1	0.625	29	102.1	1.125	34	14.8	1.127	34	18.7	0.766	34	61.4	1.061	34	20.1	0.686	34	58.3	0.666
Q9Y266	Nuclear migration protein nudC OS=Homo sapiens GN=NUDC PE=1 SV=1 - [NUDC_HUMAN]	0.8792	5	28	57	373	1.005	44	23.1	1.097	44	11.9	0.557	44	51.1	1.046	44	19.5	0.456	42	104.7	0.545	44	66.9	0.434	41	96	0.538	42	124.7	0.489	43	104	1.072	42	18.2	1.154	42	10.8	0.608	42	49.9	1.097	42	16.8	0.526	39	62.8	0.572
Q9Y2R4	Probable ATP-dependent RNA helicase DDX52 OS=Homo sapiens GN=DDX52 PE=1 SV=3 - [DDX52_HUMAN]	0.8331	48	28	76	406	0.889	37	29.2	0.84	37	31.3	1.42	39	84.5	0.852	37	27	1.898	38	93.5	2.047	39	80	2.848	37	96.8	2.395	36	73.3	2.467	35	108.7	0.95	31	22.2	0.892	29	27.9	1.933	30	67.1	0.984	31	18.8	2.216	32	64.4	2.242
Q9Y678	Coatomer subunit gamma-1 OS=Homo sapiens GN=COPG1 PE=1 SV=1 - [COPG1_HUMAN]	0.8295	5	28	72	353	1.105	38	20.9	0.93	38	14.8	0.885	38	53.8	1.019	38	20.5	0.947	38	57.5	0.941	38	41.5	0.847	33	74.1	0.739	34	80.4	0.721	36	78.6	1.107	35	15.5	0.902	35	13.8	0.864	34	43.7	1.043	35	22.8	0.852	32	64.9	0.948
M0R2Z9	SURP and G-patch domain-containing protein 2 OS=Homo sapiens GN=SUGP2 PE=1 SV=1 - [M0R2Z9_HUMAN]	0.6779	10	28	85	314	0.812	25	30.7	0.712	25	42	1.78	25	45.9	0.751	25	33.6	1.943	25	40.5	1.936	25	56.7	2.041	25	58.6	1.842	25	68	1.852	24	53.4	0.731	25	12.5	0.688	25	26.2	2.23	25	55.2	0.761	25	24.7	2.491	25	76.8	2.315
A0A024R6W0	Aspartate aminotransferase OS=Homo sapiens GN=GOT2 PE=4 SV=1 - [A0A024R6W0_HUMAN]	0.8512	5	28	46	318	1.004	45	18.2	0.961	44	14.4	0.737	44	27.8	1.001	45	18.9	0.588	44	55.1	0.655	45	41.1	0.518	42	67.8	0.566	43	61.5	0.533	42	72.9	0.951	41	17.8	0.943	41	15.4	0.791	40	32.6	1.011	41	19.3	0.645	40	58.8	0.691
A5YKK6	CCR4-NOT transcription complex subunit 1 OS=Homo sapiens GN=CNOT1 PE=1 SV=2 - [CNOT1_HUMAN]	0.5644	17	27	138	435	1.132	17	9.1	1.062	17	13.1	0.933	17	29.9	1.077	17	17.2	0.97	17	37.2	0.916	17	55	1.054	17	78.6	1.105	17	109.7	1.178	17	52.1	1.169	14	17.4	1.042	14	31.3	0.844	14	32.2	1.039	14	14.1	0.933	14	37.3	0.888
A6NMQ1	DNA polymerase OS=Homo sapiens GN=POLA1 PE=1 SV=1 - [A6NMQ1_HUMAN]	0.6608	4	27	106	356	1.059	24	17.4	1.067	24	10.7	0.789	24	40.7	1.036	24	12.9	0.883	24	32.1	0.857	24	25.4	0.831	23	49	0.835	23	44.6	0.701	24	58	1.051	21	16.7	1.124	21	12.4	0.677	21	32.7	0.981	21	19.1	0.805	21	54	0.828
O15371-3	Isoform 3 of Eukaryotic translation initiation factor 3 subunit D OS=Homo sapiens GN=EIF3D - [EIF3D_HUMAN]	0.8724	9	27	56	410	1.081	48	12.8	1.122	48	10.8	0.608	48	65.5	1.092	48	13.3	0.565	47	77.5	0.622	47	64.3	0.606	46	104.1	0.582	45	111.6	0.533	46	100.6	1.111	51	22.5	1.141	51	14.9	0.651	51	48	1.067	51	14.7	0.606	48	82.2	0.704
B0QY89	Eukaryotic translation initiation factor 3 subunit L OS=Homo sapiens GN=EIF3L PE=1 SV=1 - [B0QY89_HUMAN]	0.7331	13	27	48	277	1.12	35	21.9	1.168	34	15.7	0.602	34	90.2	1.15	35	19.3	0.546	34	92.9	0.627	34	61.5	0.595	32	78.3	0.606	32	91.7	0.682	31	63.1	1.116	39	25.1	1.111	39	11.7	0.658	38	64.5	1.063	38	18.8	0.552	35	62.5	0.622
E9PDF6	Unconventional myosin-Ib OS=Homo sapiens GN=MYO1B PE=1 SV=1 - [E9PDF6_HUMAN]	0.7182	18	27	109	339	0.975	23	11.8	1.01	23	13	0.721	22	54.3	0.975	23	10.4	0.702	22	58.9	0.755	22	50	0.734	22	57.4	0.766	22	79.2	0.728	22	77.7	0.965	23	24.2	0.967	23	15.2	0.718	22	41.8	1.033	23	16.6	0.654	22	59.4	0.669
Q9BZF9-2	Isoform 2 of Uveal autoantigen with coiled-coil domains and ankyrin repeats OS=Homo sapiens GN=UACA - [UACA_HUMAN]	0.732	10	27	152	460	0.989	15	8.1	1.015	15	15.3	1.156	15	26.1	1.046	15	10.8	1.065	15	36.8	1.069	15	22.3	1.125	15	41.5	1.07	15	52.2	1.016	15	53.3	0.988	22	13.4	0.967	22	14.6	1.129	22	42.5	0.989	22	8.1	1.084	21	57.7	1.096
O43818	U3 small nucleolar RNA-interacting protein 2 OS=Homo sapiens GN=RRP9 PE=1 SV=1 - [U3IP2_HUMAN]	0.8653	1	27	43	293	0.976	37	23.2	0.931	37	16.5	1.748	38	38.5	0.946	36	21	1.957	38	50.6	1.81	38	45.1	3.066	38	81.7	2.967	38	98.6	3.38	38	89.2	0.866	48	28.5	0.845	44	20.7	1.72	48	58.2	0.909	47	31.5	2.087	48	72.6	1.734
O60306	Intron-binding protein aquarius OS=Homo sapiens GN=AQR PE=1 SV=4 - [AQR_HUMAN]	0.5811	5	27	98	302	1.033	18	17.5	0.984	18	23	1.333	18	49.1	0.965	18	19.9	1.759	18	54.7	1.728	18	50.9	1.195	17	69.3	0.814	17	80.5	1.15	18	112.4	0.933	24	21	0.852	24	21.8	1.267	24	38.3	0.936	24	25	1.492	24	40.9	1.654
O95071	E3 ubiquitin-protein ligase UBR5 OS=Homo sapiens GN=UBR5 PE=1 SV=2 - [UBR5_HUMAN]	0.533	11	27	159	451	0.978	19	13.2	1.051	19	12.8	0.787	19	41.4	1.024	19	23.5	0.839	19	54.3	0.856	18	50.3	0.786	18	74.2	0.851	17	63.9	0.748	18	93.6	1.18	14	17.7	1.088	14	10.6	0.704	14	72.4	1.139	14	24	0.887	13	74.2	0.767
P09622	Dihydrolipoyl dehydrogenase, mitochondrial OS=Homo sapiens GN=DLD PE=1 SV=2 - [DLDH_HUMAN]	0.8546	8	27	49	343	0.995	38	18.9	1.022	38	13.9	0.827	38	47.6	1.07	38	16.9	0.717	36	70.4	0.7	34	49.3	0.678	30	106.4	0.778	31	122.2	0.729	28	129.8	1.003	46	24.1	0.99	46	13.4	0.749	44	55.9	1.005	46	27.1	0.596	40	98	0.72
P12081	Histidine--tRNA ligase, cytoplasmic OS=Homo sapiens GN=HARS PE=1 SV=2 - [SYHC_HUMAN]	0.8035	11	27	55	248	0.989	28	17.5	1.108	28	7.9	0.567	28	43.1	1.059	28	13.8	0.559	25	72	0.451	27	67.2	0.491	24	92.9	0.535	24	75.1	0.529	24	63.4	0.957	27	18	1.098	27	15	0.49	25	49.5	0.99	27	16.8	0.316	24	90.4	0.459
P15880	40S ribosomal protein S2 OS=Homo sapiens GN=RPS2 PE=1 SV=2 - [RS2_HUMAN]	0.9556	21	27	44	454	0.963	64	21.9	1.071	64	10.4	0.664	63	40.2	1.015	64	15.7	0.62	59	70.2	0.631	60	58.7	0.67	58	82.9	0.727	54	94.2	0.651	55	93	1.013	62	15.3	1.095	62	12.9	0.622	60	58.8	1.089	63	18.3	0.663	57	79.6	0.671
P30084	Enoyl-CoA hydratase, mitochondrial OS=Homo sapiens GN=ECHS1 PE=1 SV=4 - [ECHM_HUMAN]	0.8345	1	27	33	356	0.961	51	20.6	1.002	51	11.9	0.642	50	60.7	0.994	51	19.5	0.529	49	95.1	0.665	51	71.5	0.646	45	106.5	0.507	45	105.4	0.596	46	116.6	0.996	46	19.8	1.008	46	14.8	0.712	44	34.9	0.991	46	15.4	0.606	44	56.7	0.576
P31689	DnaJ homolog subfamily A member 1 OS=Homo sapiens GN=DNAJA1 PE=1 SV=2 - [DNJA1_HUMAN]	0.7783	15	27	37	547	1.08	74	21.5	1.072	74	16.2	0.987	72	47.6	1.107	74	18.9	0.905	72	55.8	0.992	72	56.7	0.971	67	95.1	0.957	71	85.8	0.989	72	94.3	1.072	71	25.2	1.04	71	20.4	1.044	71	51.4	1.056	72	25.6	1.068	67	60.6	1.032
P43686	26S protease regulatory subunit 6B OS=Homo sapiens GN=PSMC4 PE=1 SV=2 - [PRS6B_HUMAN]	0.8206	2	27	36	311	1.055	39	12.3	1.074	39	17.1	0.7	36	63.1	1.042	39	16.1	0.631	32	61.4	0.546	36	56.8	0.628	29	57.4	0.518	31	70.8	0.62	31	64.2	1.134	46	20	1.133	46	9.1	0.667	42	42.2	1.138	46	20.1	0.677	35	31.3	0.639
P51991	Heterogeneous nuclear ribonucleoprotein A3 OS=Homo sapiens GN=HNRNPA3 PE=1 SV=2 - [ROA3_HUMAN]	0.8016	7	27	55	1039	0.838	103	25.1	0.761	103	34.6	2.264	104	65.3	0.808	103	29.6	2.486	104	63.6	2.062	104	54.6	2.446	104	69.6	2.043	104	71.7	2.088	104	63.7	0.808	108	31.4	0.787	105	36.1	2.219	107	61.2	0.781	108	32.6	2.441	108	66	2.135
P55084	Trifunctional enzyme subunit beta, mitochondrial OS=Homo sapiens GN=HADHB PE=1 SV=3 - [ECHB_HUMAN]	0.8143	11	27	48	345	1.005	46	12.1	0.972	46	14.8	0.891	45	32.8	0.993	46	19.3	0.777	45	55.5	0.798	45	46.6	0.72	44	83.1	0.642	45	92.3	0.655	44	67.4	0.972	41	14	0.973	41	16.7	0.8	41	35.1	0.99	41	15.5	0.689	41	57.4	0.666
Q12802	A-kinase anchor protein 13 OS=Homo sapiens GN=AKAP13 PE=1 SV=2 - [AKP13_HUMAN]	0.6029	12	27	150	492	1.063	20	23.9	1.041	20	10.2	0.867	19	39.4	1.077	20	22.2	0.724	18	75.7	0.724	19	43.9	0.83	18	90.2	0.813	18	47.3	0.876	19	71.5	1.117	20	31.8	1.082	20	12.2	0.897	19	45.8	1.1	20	17.9	0.789	19	96.9	0.833
Q12905	Interleukin enhancer-binding factor 2 OS=Homo sapiens GN=ILF2 PE=1 SV=2 - [ILF2_HUMAN]	0.8359	6	27	30	487	0.869	57	26.6	0.806	54	32.2	1.331	56	52.4	0.787	56	26.2	1.615	56	65.3	1.658	58	69.8	1.262	53	98.5	1.1	51	86.9	1.106	50	117	0.848	53	21.9	0.735	52	33.1	1.416	54	53.7	0.797	54	39.3	1.748	57	68.4	1.757
Q13619	Cullin-4A OS=Homo sapiens GN=CUL4A PE=1 SV=3 - [CUL4A_HUMAN]	0.7141	6	27	72	324	0.895	29	21.3	0.872	29	22.3	1.228	28	28.7	0.952	28	22.8	1.387	28	35.6	1.296	28	28.5	1.212	28	43.6	1.109	27	83.5	0.978	28	65.2	1.063	29	21.7	0.945	29	15.5	1.015	29	32.9	0.974	29	17.5	1.298	29	36.8	1.171
Q15003	Condensin complex subunit 2 OS=Homo sapiens GN=NCAPH PE=1 SV=3 - [CND2_HUMAN]	0.8327	8	27	53	262	1.042	30	18.4	1.075	30	17.5	1.038	30	50.8	1.057	30	21.8	0.869	30	57.6	1.036	29	42.2	0.981	29	112.2	1.188	30	80.4	1.276	28	65.8	1.016	29	16.2	1.172	30	19.3	0.997	26	50.7	1.046	30	15.9	0.886	26	74.3	0.92
Q2TAY7	WD40 repeat-containing protein SMU1 OS=Homo sapiens GN=SMU1 PE=1 SV=2 - [SMU1_HUMAN]	0.6238	2	27	50	408	0.858	49	26.4	0.766	45	33.3	2.115	48	70.9	0.812	48	31.2	2.429	48	89.2	2.08	49	54.9	1.917	47	53.8	1.613	44	45.4	1.465	47	47	0.827	46	28.7	0.788	45	29.3	2.096	47	48.5	0.852	45	31.1	2.315	47	60	2.141
Q6P2E9	Enhancer of mRNA-decapping protein 4 OS=Homo sapiens GN=EDC4 PE=1 SV=1 - [EDC4_HUMAN]	0.5139	6	27	71	320	1.101	27	29	1.041	27	15.1	0.832	26	43.1	1.044	27	11.3	0.648	24	47.2	0.758	26	43.7	0.707	24	75.5	0.722	23	57.1	0.776	25	68.5	1.151	26	14.3	1.103	26	19.1	0.737	23	50	1.06	26	24.9	0.768	23	84.5	0.769
Q86TC9	Myopalladin OS=Homo sapiens GN=MYPN PE=1 SV=2 - [MYPN_HUMAN]	0.6712	5	27	83	259	0.999	16	19	1.029	16	10.8	1.034	16	37.1	1.044	16	13	0.904	16	41.3	1.039	16	27.3	0.905	16	36.6	0.879	16	47.1	1.008	16	42.1	1.086	20	20.4	1.139	20	12.8	0.942	20	53.6	1.044	20	19.5	0.961	20	32.5	0.935
Q8IWA0	WD repeat-containing protein 75 OS=Homo sapiens GN=WDR75 PE=1 SV=1 - [WDR75_HUMAN]	0.547	5	27	50	298	0.988	35	39	0.801	34	27.5	1.426	35	55.2	0.891	33	48.2	1.84	34	61.5	1.752	35	53.4	2.488	34	93.2	1.876	34	89.3	2.005	35	73.7	1.014	32	39.5	0.87	31	23.9	1.484	32	37.4	0.905	30	41.4	1.956	31	65.3	1.862
Q8N1F7	Nuclear pore complex protein Nup93 OS=Homo sapiens GN=NUP93 PE=1 SV=2 - [NUP93_HUMAN]	0.6886	13	27	77	313	0.863	23	13.7	0.848	23	20	1.271	23	21.5	0.807	23	31.6	1.655	23	31.4	1.813	23	42.3	1.141	23	69.1	0.913	23	57.3	0.896	23	53.2	0.905	25	25.5	0.792	25	16.9	1.396	25	20.9	0.873	25	20.6	1.772	25	27	1.796
Q8NEF9	Serum response factor-binding protein 1 OS=Homo sapiens GN=SRFBP1 PE=1 SV=1 - [SRFB1_HUMAN]	0.9231	1	27	62	294	0.957	30	14.6	0.934	29	17.5	2.116	31	58.6	0.94	30	21.6	2.621	31	87.4	2.368	31	70	3.872	31	92.3	4.045	31	105.4	5.106	31	94.1	1.033	28	29.8	0.933	28	22.7	2.257	28	48.2	0.969	28	33.7	2.545	28	69.1	2.521
Q99567	Nuclear pore complex protein Nup88 OS=Homo sapiens GN=NUP88 PE=1 SV=2 - [NUP88_HUMAN]	0.6289	7	27	56	258	0.935	27	17.6	0.877	27	26.7	1.719	27	41.5	0.942	27	20.2	2.102	27	42.7	2.024	27	35	1.504	26	40.1	1.261	26	51.3	1.263	26	48.1	0.937	29	25	0.892	29	19.3	1.529	29	31.6	0.856	29	20.5	1.928	28	42.3	1.956
Q9BQ39	ATP-dependent RNA helicase DDX50 OS=Homo sapiens GN=DDX50 PE=1 SV=1 - [DDX50_HUMAN]	0.8223	9	27	88	379	0.846	30	33.8	0.835	29	26.9	1.737	30	57.4	0.871	30	33.7	1.993	29	67.5	1.852	30	83.2	2.438	28	100.6	2.092	29	103.2	2.059	29	98.9	0.878	29	25.4	0.842	30	35.8	1.721	30	60.6	0.915	30	31.2	2.25	30	87.5	1.991
Q9GZR2	RNA exonuclease 4 OS=Homo sapiens GN=REXO4 PE=1 SV=2 - [REXO4_HUMAN]	0.8389	6	27	49	231	0.785	34	34.7	0.754	33	37.5	2.071	34	46.8	0.722	33	38.5	2.452	34	66.3	2.149	34	45	4.149	34	66.3	4.338	34	83.6	4.865	34	98.4	0.879	29	35.4	0.864	29	35.3	2.273	29	46.7	0.819	29	27.8	2.495	29	78.8	2.218
Q9H0H5	Rac GTPase-activating protein 1 OS=Homo sapiens GN=RACGAP1 PE=1 SV=1 - [RGAP1_HUMAN]	0.7801	25	27	60	281	0.971	26	13.8	0.88	27	17.2	1.105	27	52.8	1.003	27	20.3	1.036	27	55.1	1.073	26	45.9	1.078	25	70.9	1.099	23	54.9	0.863	24	70.1	0.936	24	14.9	0.919	24	15.6	1.111	24	26.9	0.906	24	14.1	1.069	24	23.5	1.013
Q9H2G2-2	Isoform 2 of STE20-like serine/threonine-protein kinase OS=Homo sapiens GN=SLK - [SLK_HUMAN]	0.7168	3	27	118	376	1.028	28	11.4	1.19	28	11.8	0.733	28	33.2	1.074	28	14.6	0.685	27	65.4	0.712	27	40.1	0.689	27	65.7	0.69	27	48.8	0.71	27	68	1.011	25	15.4	1.079	25	16.4	0.742	25	79.5	1.006	25	11.1	0.652	25	83.7	0.723
Q9HCE1	Putative helicase MOV-10 OS=Homo sapiens GN=MOV10 PE=1 SV=2 - [MOV10_HUMAN]	0.6859	7	27	79	265	1.074	22	18.4	1.03	22	10.4	0.865	19	42.6	1.037	22	15.1	0.802	21	64.2	0.743	22	39.9	0.937	19	84.4	0.805	20	75.9	0.93	20	87.2	1.186	20	26	1.016	20	25	0.831	18	68.6	1.189	20	22.6	1.006	17	49.6	0.869
Q9UG63	ATP-binding cassette sub-family F member 2 OS=Homo sapiens GN=ABCF2 PE=1 SV=2 - [ABCF2_HUMAN]	0.7079	4	27	59	252	1.015	27	18	1.055	27	18	0.805	27	49.3	1.049	27	13.9	0.728	27	55.6	0.794	27	51.6	0.707	27	71.9	0.755	26	88.8	0.726	26	65.7	1.066	30	19.1	1.121	30	14	0.803	30	50.3	1.054	30	10.5	0.8	29	48.5	0.787
Q9UKN8	General transcription factor 3C polypeptide 4 OS=Homo sapiens GN=GTF3C4 PE=1 SV=2 - [TF3C4_HUMAN]	0.8273	4	27	73	246	0.999	20	18.7	0.868	20	16.4	1.17	20	40.3	0.887	20	25.9	1.49	20	53.8	1.35	20	42.4	1.294	19	37.5	1.146	18	60.7	1.094	18	49	0.848	20	20.5	0.856	20	17.8	1.339	20	32.8	0.966	20	21.4	1.625	19	56.6	1.519
Q9UQR0	Sex comb on midleg-like protein 2 OS=Homo sapiens GN=SCML2 PE=1 SV=1 - [SCML2_HUMAN]	0.7914	5	27	63	294	0.869	24	30.2	0.867	24	33.8	2.176	24	52.8	0.865	24	30.8	2.342	24	52.2	1.977	24	37.5	2.148	24	33.1	1.767	24	53.4	1.839	23	30.7	0.83	25	39.2	0.724	25	34.6	2.165	25	49.5	0.799	25	24.9	2.371	25	53.2	2.1
Q9Y3T9	Nucleolar complex protein 2 homolog OS=Homo sapiens GN=NOC2L PE=1 SV=4 - [NOC2L_HUMAN]	0.5154	6	27	59	281	0.772	26	40.5	0.761	25	34.6	1.44	26	67.2	0.855	26	42	1.885	27	76.6	1.812	27	70.8	1.873	27	97.1	1.717	26	89.1	1.808	27	123.5	0.741	30	27.6	0.726	30	35.3	1.643	31	46.1	0.769	30	35.2	2.14	31	74.7	2.006
Q9ULV4-3	Isoform 3 of Coronin-1C OS=Homo sapiens GN=CORO1C - [COR1C_HUMAN]	0.649	21	27	46	277	0.977	34	15.9	1.044	34	12.1	0.63	33	59.7	1.04	34	17.8	0.723	32	58.8	0.644	34	57.8	0.595	31	68.9	0.613	30	66.1	0.628	30	88.4	1.087	31	16.5	1.118	31	12.5	0.566	30	37	1.04	31	22.6	0.613	28	21.6	0.62
A8K492	cDNA FLJ76789, highly similar to Homo sapiens methionine-tRNA synthetase (MARS), mRNA OS=Homo sapiens PE=2 SV=1 - [A8K492_HUMAN]	0.6278	17	27	57	227	1.08	29	18.3	1.086	29	8.6	0.599	28	42.5	1.076	29	12.6	0.578	27	54.1	0.607	28	39.2	0.552	28	88.7	0.622	28	63	0.681	27	95.5	1.074	20	18.5	1.06	20	11	0.625	19	59.7	1.057	20	18	0.543	20	71.8	0.62
Q59HH7	X-ray repair cross complementing protein 1 variant (Fragment) OS=Homo sapiens PE=2 SV=1 - [Q59HH7_HUMAN]	0.6321	14	27	47	216	0.847	30	23.7	0.828	30	20.1	2.203	29	41.3	0.812	30	17.9	2.453	30	42.3	2.114	29	35.6	2.51	29	39.8	2.343	30	51.5	2.356	29	38.6	0.819	26	18.2	0.853	26	17.2	2.05	26	42	0.843	25	32.8	2.187	26	39.3	1.836
A8K6G9	cDNA FLJ76871, highly similar to Homo sapiens DEAH (Asp-Glu-Ala-His) box polypeptide 38 (DHX38), mRNA OS=Homo sapiens PE=2 SV=1 - [A8K6G9_HUMAN]	0.6243	12	27	99	288	0.863	21	16.2	0.796	20	17.5	1.453	19	33.6	0.875	20	9.9	1.599	20	36.7	1.339	19	28.7	1.466	19	56.1	1.431	17	41.6	1.534	18	48.9	0.863	23	11.2	0.84	23	17.8	1.345	23	34.7	0.871	23	15.6	1.358	23	38.6	1.364
B3KN05	cDNA FLJ13129 fis, clone NT2RP3002969, highly similar to Long-chain-fatty-acid--CoA ligase 3 (EC 6.2.1.3) OS=Homo sapiens PE=2 SV=1 - [B3KN05_HUMAN]	0.7362	8	27	51	275	1.053	37	19.3	0.801	37	21.8	0.802	37	24.4	0.93	37	23.9	0.865	37	34	0.971	37	27	0.732	37	60.5	0.698	37	92.2	0.683	36	60.5	1.034	30	19	0.828	30	26.2	0.874	30	40.3	1.006	30	18.5	0.929	30	56.1	1.082
A0A024R814	Ribosomal protein L7, isoform CRA_a OS=Homo sapiens GN=RPL7 PE=4 SV=1 - [A0A024R814_HUMAN]	0.888	9	27	47	423	1.117	54	17.7	1.183	54	14.9	0.786	53	58.9	1.153	54	16	0.845	54	40.7	0.827	54	58.8	0.711	53	72.3	0.642	51	76.8	0.675	51	42.2	1.11	51	22.9	1.123	51	17.5	0.808	51	57.4	1.127	51	19	0.824	50	51.2	0.851
P06737-2	Isoform 2 of Glycogen phosphorylase, liver form OS=Homo sapiens GN=PYGL - [PYGL_HUMAN]	0.7405	6	26	80	365	1.077	25	13.9	1.118	25	15.3	0.63	25	66.6	1.115	25	17.2	0.511	25	99.2	0.519	25	42.1	0.668	22	67.3	0.532	23	64.2	0.614	23	70.6	1.071	28	16	1.071	28	18.8	0.612	25	60	1.036	28	15.8	0.574	26	80.3	0.644
O00232	26S proteasome non-ATPase regulatory subunit 12 OS=Homo sapiens GN=PSMD12 PE=1 SV=3 - [PSD12_HUMAN]	0.8794	6	26	57	283	0.963	30	19.4	1.063	30	15.7	0.538	26	49.2	1.025	30	24.1	0.624	25	50.9	0.563	27	59.6	0.669	22	43.7	0.6	23	60.1	0.726	21	73.2	0.992	27	21.9	1.092	26	11.9	0.588	24	46.5	1.098	27	21.8	0.636	20	28.8	0.644
O00425	Insulin-like growth factor 2 mRNA-binding protein 3 OS=Homo sapiens GN=IGF2BP3 PE=1 SV=2 - [IF2B3_HUMAN]	0.7168	3	26	60	321	1.023	30	21.6	1.113	30	19.2	0.729	30	46.5	1.089	30	19.8	0.67	29	63.4	0.67	29	55.1	0.688	29	62.7	0.614	26	79.6	0.566	27	72.7	1.056	31	18.7	1.114	31	10.1	0.707	28	49.8	1.105	30	13	0.644	29	39	0.717
O60488	Long-chain-fatty-acid--CoA ligase 4 OS=Homo sapiens GN=ACSL4 PE=1 SV=2 - [ACSL4_HUMAN]	0.7356	9	26	65	262	0.992	20	25	0.955	20	17.9	0.886	19	42.6	1.106	20	25.6	0.581	20	96.2	0.699	20	68.6	0.61	20	90.8	0.587	20	96.1	0.627	20	58.5	1.046	26	19.6	0.972	26	14.5	0.743	25	48.2	1.032	26	23.6	0.773	25	56.6	0.741
O60568	Procollagen-lysine,2-oxoglutarate 5-dioxygenase 3 OS=Homo sapiens GN=PLOD3 PE=1 SV=1 - [PLOD3_HUMAN]	0.6463	11	26	49	264	1.044	27	18.8	0.875	27	13.7	0.887	24	27.3	1.023	27	20.7	0.766	24	45.9	0.808	26	25.7	0.797	21	53.7	0.845	23	43.9	0.794	22	53.9	1.01	29	21.3	1.013	29	21.1	0.853	25	30.6	1.092	29	20	0.789	25	39.2	0.858
O95235	Kinesin-like protein KIF20A OS=Homo sapiens GN=KIF20A PE=1 SV=1 - [KI20A_HUMAN]	0.7708	4	26	84	348	0.908	22	17.9	0.915	22	30	1.604	22	58.3	0.885	22	37.8	1.825	22	50.6	1.851	22	39.3	1.803	21	70.5	1.71	21	55	1.695	21	59.3	0.875	22	18.7	0.835	22	19.6	1.843	22	50.4	0.849	22	32.4	1.928	22	52.1	1.901
P09429	High mobility group protein B1 OS=Homo sapiens GN=HMGB1 PE=1 SV=3 - [HMGB1_HUMAN]	0.9163	8	26	43	773	0.816	101	22.3	0.813	101	15.8	2.389	101	31.4	0.797	101	17.1	3.138	101	36.2	2.472	101	30.2	1.909	101	36.1	1.753	100	48.2	1.998	101	41.6	0.816	83	20.2	0.824	83	15.8	2.39	83	30.1	0.781	83	21.1	3.085	83	30.9	2.413
P13804	Electron transfer flavoprotein subunit alpha, mitochondrial OS=Homo sapiens GN=ETFA PE=1 SV=1 - [ETFA_HUMAN]	0.985	11	26	41	283	1.024	41	17.6	1.067	41	17.8	0.687	40	60.2	1.071	41	18.4	0.482	40	81.6	0.611	40	75.3	0.555	37	127.8	0.479	35	95.1	0.425	37	106	1.05	40	20.7	1.01	40	14.2	0.738	39	53.6	1.014	40	17.2	0.654	37	63.8	0.675
P16401	Histone H1.5 OS=Homo sapiens GN=HIST1H1B PE=1 SV=3 - [H15_HUMAN]	0.9779	2	26	66	905	0.702	78	55.7	0.603	79	73.3	3.591	80	88.9	0.654	77	60.2	4.292	80	93.1	3.65	80	80.5	3.493	80	109	3.153	80	93.7	3.225	80	93.1	0.723	82	36.7	0.624	82	65.9	3.211	83	92.9	0.73	82	46.9	3.548	83	98.6	3.305
P16949	Stathmin OS=Homo sapiens GN=STMN1 PE=1 SV=3 - [STMN1_HUMAN]	0.9396	22	26	34	301	1.061	43	16.4	1.221	43	12.2	0.538	42	44.6	1.113	43	18	0.471	40	54.8	0.577	42	48.1	0.539	40	105.2	0.601	37	85.7	0.525	40	113.1	1.053	41	14.9	1.199	41	10.7	0.431	40	93.3	1.145	41	14.5	0.434	35	88.5	0.507
P28838	Cytosol aminopeptidase OS=Homo sapiens GN=LAP3 PE=1 SV=3 - [AMPL_HUMAN]	0.9538	6	26	53	267	0.967	27	17.5	1.036	28	7.7	0.65	27	43.6	1.017	28	17.1	0.641	26	54.4	0.595	27	74.5	0.629	23	60.6	0.493	25	81.8	0.564	25	56.4	1.05	28	19.5	1.113	28	9.8	0.71	26	26.1	1.052	27	13.6	0.633	26	59.8	0.673
P46781	40S ribosomal protein S9 OS=Homo sapiens GN=RPS9 PE=1 SV=3 - [RS9_HUMAN]	0.732	15	26	34	305	0.845	49	21.2	1.099	49	17	0.467	43	48.5	1.069	48	26.9	0.445	42	69.6	0.477	48	80.8	0.383	38	127.8	0.361	37	106.7	0.41	35	105.3	0.908	42	20.4	1.041	42	18.4	0.47	39	77.7	1.102	42	24.8	0.431	37	74.7	0.502
P50454	Serpin H1 OS=Homo sapiens GN=SERPINH1 PE=1 SV=2 - [SERPH_HUMAN]	0.9067	16	26	50	352	1.075	51	23.3	1.083	51	19.4	0.722	50	43.9	1.103	51	20.6	0.587	48	61.6	0.693	50	46.1	0.697	46	68.7	0.586	43	103	0.613	42	106	1.109	53	17.8	1.098	52	15.7	0.682	51	42.6	1.118	52	24.7	0.631	49	68.4	0.677
P55809	Succinyl-CoA:3-ketoacid coenzyme A transferase 1, mitochondrial OS=Homo sapiens GN=OXCT1 PE=1 SV=1 - [SCOT1_HUMAN]	0.7	7	26	44	384	1.026	47	21.6	1.053	46	13.9	0.737	43	59.6	1.089	47	18.8	0.537	44	69.2	0.617	45	65.8	0.631	39	95.6	0.552	39	100.9	0.566	41	135	1.08	52	23.9	1.072	51	9.9	0.841	49	45.7	1.035	52	14.6	0.63	47	73.5	0.632
P62195	26S protease regulatory subunit 8 OS=Homo sapiens GN=PSMC5 PE=1 SV=1 - [PRS8_HUMAN]	0.9236	15	26	52	357	1.096	44	19.9	1.208	44	11.1	0.746	43	43.4	1.076	44	18.9	0.73	42	38.1	0.746	43	45.7	0.59	42	109.1	0.62	42	127	0.685	42	81.1	1.12	39	22.6	1.145	39	15.2	0.728	36	53.4	1.135	39	25.8	0.62	36	57.6	0.653
P62753	40S ribosomal protein S6 OS=Homo sapiens GN=RPS6 PE=1 SV=1 - [RS6_HUMAN]	0.8474	5	26	48	437	1.145	70	18.7	1.127	70	10.1	0.738	68	48.1	1.1	70	17.4	0.764	68	61.1	0.785	67	52.2	0.675	65	65.3	0.624	65	59.3	0.734	65	68.3	1.136	58	15.5	1.113	58	12.6	0.85	58	34.5	1.101	58	15.3	0.874	58	50.9	0.922
Q14498-2	Isoform 2 of RNA-binding protein 39 OS=Homo sapiens GN=RBM39 - [RBM39_HUMAN]	0.729	36	26	44	423	0.89	52	22.6	0.887	50	21.5	1.54	52	56.8	0.884	52	25.8	1.717	51	50.4	1.569	51	63.5	1.658	49	64.7	1.386	49	75.5	1.449	49	72.7	0.879	52	17.8	0.879	51	28.7	1.543	50	47.3	0.881	52	23	1.807	50	65.1	1.65
Q14807	Kinesin-like protein KIF22 OS=Homo sapiens GN=KIF22 PE=1 SV=5 - [KIF22_HUMAN]	0.8406	12	26	67	250	0.914	25	21.6	0.841	25	18.1	1.98	25	39.1	0.905	25	25.8	2.113	25	39	1.896	25	31.8	2.084	25	69.5	1.865	25	65.5	1.923	25	62.2	0.907	27	18.7	0.904	27	15.8	1.913	27	37.4	0.907	27	20.2	1.995	27	39.7	1.881
Q15269	Periodic tryptophan protein 2 homolog OS=Homo sapiens GN=PWP2 PE=2 SV=2 - [PWP2_HUMAN]	0.481	3	26	59	300	0.727	22	30.1	0.672	22	34.9	1.605	22	57.5	0.686	24	29.7	2.281	23	55.8	2.121	22	72.6	2.992	23	66.6	2.136	22	80.3	2.54	23	73.5	0.825	22	34.4	0.693	21	43.2	1.485	21	48.4	0.773	20	36.8	2.081	21	67.5	2.108
Q6RFH5	WD repeat-containing protein 74 OS=Homo sapiens GN=WDR74 PE=1 SV=1 - [WDR74_HUMAN]	0.8649	7	26	45	353	0.978	45	21.3	0.932	46	23.2	1.818	48	44.9	0.946	45	15	2.132	47	40.8	2	46	33.8	3.845	48	76.2	3.814	47	97.7	3.55	48	84.1	0.959	41	21.7	0.95	39	22.4	1.797	41	43.3	0.938	41	22.2	1.981	41	59.7	1.668
Q7L0Y3	Mitochondrial ribonuclease P protein 1 OS=Homo sapiens GN=TRMT10C PE=1 SV=2 - [MRRP1_HUMAN]	0.7792	5	26	39	258	0.988	28	17.4	1.021	28	13.5	0.737	27	28.6	0.985	28	16.5	0.613	28	43.8	0.662	27	27.5	0.637	27	71.3	0.73	27	50.2	0.684	26	74.5	0.999	31	23.5	1.007	31	12.6	0.823	31	47.8	1.022	31	27.7	0.624	31	72.2	0.672
Q7Z417	Nuclear fragile X mental retardation-interacting protein 2 OS=Homo sapiens GN=NUFIP2 PE=1 SV=1 - [NUFP2_HUMAN]	0.6676	2	26	63	346	1.018	35	14.4	1.079	35	8.7	0.917	35	26.8	1.001	35	14.6	0.847	35	57.8	0.854	35	40.8	0.898	35	91.6	0.952	35	64.9	0.951	35	90.9	1.034	30	14.9	1.098	30	16	0.871	30	41.2	1.052	30	16.4	0.778	30	56.2	0.81
Q8TEM1	Nuclear pore membrane glycoprotein 210 OS=Homo sapiens GN=NUP210 PE=1 SV=3 - [PO210_HUMAN]	0.5135	2	26	86	269	0.862	22	24.9	0.764	22	22.3	1.293	22	30.5	0.814	22	19.2	1.615	21	36.5	1.75	22	39	1.063	22	47	1.083	20	32.8	1.101	19	27.8	0.905	24	25	0.828	24	15.6	1.325	24	31.5	0.875	24	27.8	1.629	24	32.4	1.794
Q8WWM7	Ataxin-2-like protein OS=Homo sapiens GN=ATXN2L PE=1 SV=2 - [ATX2L_HUMAN]	0.5693	18	26	73	417	1.133	32	16.5	1.135	32	18	0.856	32	49	1.098	32	21	0.805	32	63.2	0.866	32	32	0.879	31	96.5	0.794	31	72.6	1.086	31	118.1	1.019	27	19.7	1.117	27	9.9	0.912	27	38.8	1.016	27	14	0.972	27	68.1	0.926
Q96QC0	Serine/threonine-protein phosphatase 1 regulatory subunit 10 OS=Homo sapiens GN=PPP1R10 PE=1 SV=1 - [PP1RA_HUMAN]	0.5872	2	26	64	202	0.852	25	23.3	0.794	25	28.9	1.842	25	36.4	0.801	25	22.3	1.805	25	40.2	1.643	25	28.8	1.751	25	65	1.754	25	74.2	1.492	25	79.8	0.814	15	24.3	0.746	15	33.6	2.266	15	46	0.779	15	32.1	2.526	15	53.6	2.179
Q96QK1	Vacuolar protein sorting-associated protein 35 OS=Homo sapiens GN=VPS35 PE=1 SV=2 - [VPS35_HUMAN]	0.5766	5	26	56	353	1.074	33	28.9	0.991	33	12.9	0.707	32	65.2	0.976	33	16.4	0.769	32	67.4	0.733	32	78.9	0.751	30	62.3	0.552	31	73.5	0.72	29	85.2	1.219	19	16	1.026	18	16.2	0.826	18	35.7	1.084	19	19.4	0.715	18	39.1	0.855
Q99590	Protein SCAF11 OS=Homo sapiens GN=SCAF11 PE=1 SV=2 - [SCAFB_HUMAN]	0.6951	12	26	141	496	0.807	23	27.9	0.728	23	28.5	2.487	23	61	0.674	23	23.3	2.753	23	49.1	2.631	23	61.2	2.327	23	74.7	2.491	23	56	2.449	23	73	0.766	23	44.7	0.703	23	34.2	2.331	23	46.9	0.754	23	21	2.602	23	53	2.335
Q9BQ52	Zinc phosphodiesterase ELAC protein 2 OS=Homo sapiens GN=ELAC2 PE=1 SV=2 - [RNZ2_HUMAN]	0.632	17	26	54	281	0.987	33	12.6	1.043	33	14.4	0.807	33	42.7	1.074	33	13.5	0.742	33	60.4	0.841	33	46.1	0.769	32	52	0.773	33	61.7	0.698	32	75.9	1.037	32	16.6	1.049	31	9.6	0.9	31	43.1	1.071	31	11	0.719	30	48.2	0.764
Q9GZL7	Ribosome biogenesis protein WDR12 OS=Homo sapiens GN=WDR12 PE=1 SV=2 - [WDR12_HUMAN]	0.9433	2	26	44	240	0.816	36	34	0.819	37	39.4	1.673	37	64.5	0.877	37	37.2	1.872	37	78.5	1.716	37	80.2	3.179	36	98.1	3.223	36	97	3.616	37	99.9	0.902	34	37	0.947	34	35.7	1.705	34	45.2	0.899	34	33.9	1.923	34	70.6	1.657
Q9H0A0	RNA cytidine acetyltransferase OS=Homo sapiens GN=NAT10 PE=1 SV=2 - [NAT10_HUMAN]	0.7483	7	26	96	461	0.9	30	22.8	0.827	31	38.8	1.489	32	39.2	0.853	32	31.3	2.003	31	36	1.81	32	42.9	2.465	32	70.8	1.834	30	65.7	2.116	32	80.9	0.911	32	28.3	0.843	31	38.9	1.621	30	59.4	0.836	30	36.8	1.726	31	97.2	1.815
Q9H0S4	Probable ATP-dependent RNA helicase DDX47 OS=Homo sapiens GN=DDX47 PE=1 SV=1 - [DDX47_HUMAN]	0.9451	8	26	54	357	0.88	43	24.7	0.862	42	22.6	1.889	44	46.5	0.864	41	25.7	2.054	43	57.7	1.674	43	45.9	2.93	43	79.2	2.605	42	112.6	2.578	43	99.2	0.797	41	28.4	0.832	40	18.8	1.784	41	53.6	0.795	39	33	2.277	40	91.9	1.991
Q9H6T3	RNA polymerase II-associated protein 3 OS=Homo sapiens GN=RPAP3 PE=1 SV=2 - [RPAP3_HUMAN]	0.8466	3	26	77	278	1.085	24	20.1	1.123	24	18.1	0.908	23	41.7	1.092	24	18.5	0.779	24	45	0.836	23	47.8	0.805	22	60.9	0.905	22	77.7	0.85	22	64.2	1.054	22	14.6	1.106	22	12.9	0.74	22	28.1	1.091	22	20.8	0.647	22	38.4	0.74
Q9H9L3	Interferon-stimulated 20 kDa exonuclease-like 2 OS=Homo sapiens GN=ISG20L2 PE=1 SV=1 - [I20L2_HUMAN]	0.8272	1	26	49	306	0.881	30	27.8	0.787	30	33.9	2.15	29	52.8	0.848	30	20.5	2.591	30	67.5	2.163	30	37.9	3.783	30	85.2	3.37	30	106.3	4.351	30	85.4	0.87	31	27.9	0.85	31	23.9	2.21	32	39.2	0.855	30	16.6	2.556	31	38.8	2.271
Q9HC35	Echinoderm microtubule-associated protein-like 4 OS=Homo sapiens GN=EML4 PE=1 SV=3 - [EMAL4_HUMAN]	0.7615	4	26	71	258	1.02	24	24.5	1.08	24	10.4	0.83	22	48.8	1.068	24	16.3	0.749	21	85.3	0.907	21	75.4	0.808	22	69.1	0.873	22	104.5	0.72	23	79.6	1.009	24	17.2	1.088	24	14.4	0.81	24	53.9	0.972	24	12.9	0.754	23	94.4	0.825
Q9HCK8	Chromodomain-helicase-DNA-binding protein 8 OS=Homo sapiens GN=CHD8 PE=1 SV=5 - [CHD8_HUMAN]	0.5378	14	26	160	401	0.966	18	31.9	0.861	18	28	1.701	18	38.8	0.882	18	34.7	1.888	18	41	1.879	18	42.4	1.712	18	43	1.533	18	50.9	1.587	18	47.6	0.882	15	14.6	0.872	15	22.2	1.593	15	46	0.888	15	18.4	1.815	15	63.3	1.556
Q9NZB2-6	Isoform F of Constitutive coactivator of PPAR-gamma-like protein 1 OS=Homo sapiens GN=FAM120A - [F120A_HUMAN]	0.5951	9	26	71	290	1.09	30	23.1	1.11	30	14.6	1.058	30	43.2	1.109	30	20.4	1.069	29	64.7	1.134	30	65.9	1.135	28	112.2	1.145	27	119.2	1.284	28	74.8	1.01	26	13.8	1.016	26	19.2	0.91	26	49.6	1.095	26	19.5	0.845	26	66.4	0.844
Q9Y3F4	Serine-threonine kinase receptor-associated protein OS=Homo sapiens GN=STRAP PE=1 SV=1 - [STRAP_HUMAN]	0.9143	4	26	33	307	1.048	54	27.5	1.107	54	15	0.767	54	43.1	1.091	54	20.2	0.709	51	53.4	0.77	52	50.6	0.528	49	80.2	0.557	50	111.3	0.696	48	74.1	1.019	49	32.8	1.125	49	12.1	0.835	48	45	1.022	49	23.2	0.634	46	57.3	0.665
A8K6K1	cDNA FLJ78667, highly similar to Homo sapiens ring finger protein 40 (RNF40), transcript variant 1, mRNA OS=Homo sapiens PE=2 SV=1 - [A8K6K1_HUMAN]	0.754	20	26	106	521	0.983	24	22.6	0.97	24	13	1.556	24	44.2	0.994	24	17.9	1.605	24	48	1.621	24	34.7	1.427	24	67.9	1.367	24	55.9	1.393	24	60	0.961	22	21.7	0.904	22	11.4	1.463	22	22.1	0.93	22	22.3	1.572	22	39.1	1.562
A8KAE0	cDNA FLJ78476, highly similar to Homo sapiens WD repeat and HMG-box DNA binding protein 1 (WDHD1), transcript variant 1, mRNA OS=Homo sapiens PE=2 SV=1 - [A8KAE0_HUMAN]	0.62	8	26	83	284	0.992	27	14.9	0.993	27	13.2	1.338	27	26.7	0.992	27	17.9	1.274	27	44.9	1.289	27	32.2	1.019	27	46.9	1.085	27	63.3	0.983	26	39.5	1.008	17	14.5	0.973	17	17.8	1.195	17	29.3	0.943	17	17	1.106	16	39.3	1.267
B4DZF2	cDNA FLJ59571, highly similar to Eukaryotic translation initiation factor 4gamma 2 OS=Homo sapiens PE=2 SV=1 - [B4DZF2_HUMAN]	0.75	18	26	91	428	1.066	29	17.2	1.057	29	11.9	0.621	29	79.2	0.982	29	20.9	0.635	28	83.5	0.618	29	51	0.64	26	111.1	0.728	26	95.5	0.625	26	124.5	1.002	32	18.2	1.013	32	17.1	0.704	32	65.1	0.991	32	24	0.714	31	77.4	0.618
Q6FHZ0	Malate dehydrogenase OS=Homo sapiens GN=MDH2 PE=2 SV=1 - [Q6FHZ0_HUMAN]	0.8166	51	26	34	479	0.984	78	18.8	0.981	77	15.3	0.74	73	53.4	0.967	78	17.4	0.581	71	70	0.577	71	54.3	0.548	67	123.5	0.541	65	115.1	0.584	65	91.4	1.031	75	22.9	1.038	74	12.8	0.704	71	48.8	1.017	74	22	0.584	67	94.2	0.558
B3KP47	cDNA FLJ31151 fis, clone IMR322001541, highly similar to Probable ribosome biogenesis protein RLP24 OS=Homo sapiens PE=2 SV=1 - [B3KP47_HUMAN]	0.8405	5	26	36	314	0.872	40	24.7	0.897	40	21.7	1.72	40	59.3	0.898	40	18.9	2.051	40	76.3	1.967	40	61.8	2.969	40	88.7	2.623	40	76.8	3.002	40	90.8	0.874	49	23.7	0.892	49	24.1	1.891	49	64.3	0.83	49	21.9	2.258	49	78.1	2.056
A0A0S2Q0B1	AT-rich interactive domain-containing protein 1A OS=Homo sapiens GN=ARID1A PE=4 SV=1 - [A0A0S2Q0B1_HUMAN]	0.5116	17	26	103	406	0.99	17	39.2	0.729	17	33.9	2.345	17	47.6	0.855	16	40.1	2.609	17	48.6	2.258	17	42	2.332	16	75.2	2.373	15	57.3	2.242	15	38.3	0.8	21	39.2	0.709	21	41.9	2.207	21	46	0.776	21	43.8	2.783	21	53.6	2.598
D3DVC4	Nestin, isoform CRA_c OS=Homo sapiens GN=NES PE=3 SV=1 - [D3DVC4_HUMAN]	0.5916	6	25	104	364	1.074	21	11.4	1.115	21	17.8	0.795	20	43	1.129	21	12.8	0.696	20	52.9	0.762	20	34.7	0.726	20	63	0.747	18	51.9	0.598	20	57	1.08	25	12.5	1.149	25	17.9	0.554	23	48.5	1.093	25	13.8	0.63	22	83.3	0.653
A0A140T9E9	Bromodomain-containing protein 2 (Fragment) OS=Homo sapiens GN=BRD2 PE=1 SV=1 - [A0A140T9E9_HUMAN]	0.5787	19	25	52	243	0.786	21	30.8	0.776	20	24.9	2.159	21	51.9	0.756	20	30.1	2.617	21	48	2.395	21	64.1	2.486	21	55	2.706	21	35.3	2.781	21	45.7	0.903	22	49.3	0.724	22	32.1	2.375	22	38.1	0.718	22	30.2	2.936	22	38.1	2.33
H3BSH7	U3 small nucleolar RNA-associated protein 4 homolog (Fragment) OS=Homo sapiens GN=UTP4 PE=1 SV=1 - [H3BSH7_HUMAN]	0.7514	14	25	52	281	0.898	38	23.6	0.874	36	28.5	1.598	37	40.2	0.913	38	22	2.064	37	45.7	2.011	38	48.9	2.501	37	84.7	1.787	37	109	2.021	37	77.1	0.896	31	23.9	0.777	32	35.7	1.853	32	39.6	0.896	32	28.6	2.54	32	59.1	2.434
O43159	Ribosomal RNA-processing protein 8 OS=Homo sapiens GN=RRP8 PE=1 SV=2 - [RRP8_HUMAN]	0.7368	3	25	43	220	0.885	31	19	0.805	31	22.8	1.955	31	64.7	0.899	31	15.9	2.591	31	77.2	2.302	31	99.3	3.799	31	112.1	3.474	31	144.9	3.077	31	145.6	0.817	30	32.6	0.817	30	33.7	1.951	31	77.6	0.798	31	34.9	2.199	31	82.5	2.095
O43615	Mitochondrial import inner membrane translocase subunit TIM44 OS=Homo sapiens GN=TIMM44 PE=1 SV=2 - [TIM44_HUMAN]	0.8872	8	25	47	223	0.927	26	15.8	0.998	26	13	0.688	26	78.2	0.953	26	22.1	0.68	25	69.1	0.649	25	74.6	0.536	25	90.7	0.62	25	66.9	0.634	24	100.2	0.994	33	17.6	0.982	33	11.2	0.779	33	38.2	0.963	33	15	0.598	31	70.4	0.678
O60271	C-Jun-amino-terminal kinase-interacting protein 4 OS=Homo sapiens GN=SPAG9 PE=1 SV=4 - [JIP4_HUMAN]	0.6737	30	25	91	308	0.888	12	14.1	1.063	12	18.2	0.599	12	37.8	0.984	12	12.6	0.411	12	179.6	0.627	12	75.1	0.404	12	106.1	0.436	12	54	0.629	12	119.7	1.043	24	13.8	1.093	24	10.5	0.753	23	52.3	1.003	24	10.5	0.786	24	30.1	0.739
O76031	ATP-dependent Clp protease ATP-binding subunit clpX-like, mitochondrial OS=Homo sapiens GN=CLPX PE=1 SV=2 - [CLPX_HUMAN]	0.8357	6	25	73	304	1.038	28	16.3	1.027	28	13.4	0.761	28	48	1.063	28	17.9	0.695	28	62.1	0.733	28	46	0.709	27	70.7	0.467	27	112	0.532	28	106.2	1.024	25	23.7	1.101	25	9.4	0.783	25	52.5	1.072	25	17.5	0.713	25	64.7	0.715
P05023	Sodium/potassium-transporting ATPase subunit alpha-1 OS=Homo sapiens GN=ATP1A1 PE=1 SV=1 - [AT1A1_HUMAN]	0.5924	29	25	81	401	1.241	28	16.4	0.921	27	14	0.733	28	45.1	1.016	28	16.8	0.754	27	50.4	0.805	27	26.4	0.708	25	91.3	0.69	26	98.3	0.635	26	111.1	1.227	29	18.8	0.88	29	18.9	0.871	27	48.5	0.95	29	18.5	0.822	27	114.2	0.86
P05198	Eukaryotic translation initiation factor 2 subunit 1 OS=Homo sapiens GN=EIF2S1 PE=1 SV=3 - [IF2A_HUMAN]	0.9397	10	25	44	330	0.975	38	22.5	0.977	38	13.8	0.975	38	53	0.985	38	16.8	1.025	38	56.6	0.872	38	53.7	1.044	38	59.5	0.995	38	37.9	0.891	38	43.4	0.917	42	17.2	1.05	42	14.8	0.888	41	35.1	0.97	42	13.1	0.928	40	46.3	0.821
P09661	U2 small nuclear ribonucleoprotein A' OS=Homo sapiens GN=SNRPA1 PE=1 SV=2 - [RU2A_HUMAN]	0.9961	9	25	45	336	0.881	43	22.9	0.854	40	29	1.913	42	49.9	0.899	41	22.2	1.927	42	53.4	1.774	41	43.4	2.07	41	82.7	2.034	39	55	1.761	40	80.2	0.887	46	20.1	0.935	45	18.9	1.694	47	61.5	0.947	45	17.6	1.931	47	69.2	1.737
P20042	Eukaryotic translation initiation factor 2 subunit 2 OS=Homo sapiens GN=EIF2S2 PE=1 SV=2 - [IF2B_HUMAN]	0.6997	4	25	39	263	0.956	24	20.3	1.05	24	13.7	0.818	24	14.1	0.951	24	16.1	0.86	24	36.8	0.832	24	17.5	0.848	24	48.9	0.743	24	39.8	0.76	23	67.2	0.97	31	11.9	1.055	31	12.6	0.906	30	32.4	1.021	31	14.4	0.854	30	39.5	0.909
P23284	Peptidyl-prolyl cis-trans isomerase B OS=Homo sapiens GN=PPIB PE=1 SV=2 - [PPIB_HUMAN]	0.8472	4	25	36	414	1.194	49	23.8	1.158	49	16.4	1.229	48	41.6	1.114	48	15.2	1.117	49	53.2	1.147	49	41.3	1.058	48	85.3	1.11	49	81.8	1.009	48	72.5	1.229	55	32.3	1.178	55	14.7	1.2	55	45.1	1.159	55	23.9	1.089	55	65.8	1.17
P27695	DNA-(apurinic or apyrimidinic site) lyase OS=Homo sapiens GN=APEX1 PE=1 SV=2 - [APEX1_HUMAN]	0.978	11	25	41	275	0.955	36	12	0.984	36	16.1	1.12	36	31.1	0.963	36	19.6	1.225	36	36.2	1.109	36	45.4	1.065	36	59.2	1.048	36	39.2	0.937	34	70.6	0.907	33	21.3	0.941	33	13.5	1.11	32	36.1	0.924	33	14.7	1.2	32	39.7	1.14
P39880-3	Isoform 3 of Homeobox protein cut-like 1 OS=Homo sapiens GN=CUX1 - [CUX1_HUMAN]	0.6807	7	25	136	524	0.88	25	23.5	0.869	25	28.2	2.069	25	58.3	0.855	25	32.5	2.187	25	62.3	2.054	25	53.4	2.402	25	67.8	2.548	23	66.3	2.478	25	59.7	0.848	16	30.4	0.805	16	42.9	1.738	16	54	0.848	16	30.4	1.859	16	47.5	1.696
P43490	Nicotinamide phosphoribosyltransferase OS=Homo sapiens GN=NAMPT PE=1 SV=1 - [NAMPT_HUMAN]	0.6884	6	25	39	213	0.981	28	13.8	1.151	28	9.9	0.441	27	51	1.038	28	11.3	0.417	26	80	0.46	27	64.2	0.532	22	103	0.459	24	71	0.582	24	89.1	1.004	29	15.6	1.163	28	9.3	0.467	25	50.2	1.091	29	17	0.435	26	86.9	0.485
P48444	Coatomer subunit delta OS=Homo sapiens GN=ARCN1 PE=1 SV=1 - [COPD_HUMAN]	0.7025	6	25	58	301	1.003	36	11.7	0.994	36	8.2	0.965	34	37.9	1.05	35	14.1	0.811	33	46.1	0.902	35	34.1	0.684	33	45.1	0.667	32	59	0.706	32	89.4	1.056	36	16.3	0.998	37	13.9	0.991	34	48.2	1.038	36	11.6	0.909	35	44.3	0.873
P49189	4-trimethylaminobutyraldehyde dehydrogenase OS=Homo sapiens GN=ALDH9A1 PE=1 SV=3 - [AL9A1_HUMAN]	0.6761	6	25	40	261	1.022	33	22	1.101	33	15.6	0.764	33	46.1	1.039	33	18.5	0.695	33	54.7	0.798	33	42.8	0.801	32	74.6	0.759	33	63.1	0.837	32	59.7	1.047	29	23.5	1.091	29	9.9	0.766	29	39.1	1.068	29	19.5	0.665	29	72.6	0.647
P62280	40S ribosomal protein S11 OS=Homo sapiens GN=RPS11 PE=1 SV=3 - [RS11_HUMAN]	0.981	4	25	36	286	1.102	42	21.3	1.102	42	13.5	0.973	42	95.4	1.062	42	19.6	0.988	41	118.4	0.98	42	73.2	1.152	41	158.3	1.02	41	165.2	1.356	41	135.8	1.069	47	20.5	1.192	47	10.6	0.957	44	78.1	1.082	47	23.2	0.927	44	111.7	0.967
Q13616	Cullin-1 OS=Homo sapiens GN=CUL1 PE=1 SV=2 - [CUL1_HUMAN]	0.8106	15	25	83	266	1.1	21	22.1	1.01	21	15.8	0.876	21	30.7	0.957	21	12.7	0.882	20	40.7	0.912	20	40.9	0.737	20	72.7	0.584	20	96.4	0.733	20	98.4	0.975	21	15.6	0.976	21	11.6	0.956	21	43.8	0.911	21	11.4	1.149	21	32	1.023
Q14764	Major vault protein OS=Homo sapiens GN=MVP PE=1 SV=4 - [MVP_HUMAN]	0.692	15	25	56	208	1.07	22	23.2	1.051	22	8.6	1.034	20	36.1	1.048	22	17.1	0.976	21	50.2	1.005	22	53	1.032	21	53.2	0.85	19	106	1.025	18	54.4	0.999	16	15.2	1.095	16	15.2	0.942	15	54.5	1.065	16	18.6	0.821	16	64.5	0.95
Q15648	Mediator of RNA polymerase II transcription subunit 1 OS=Homo sapiens GN=MED1 PE=1 SV=4 - [MED1_HUMAN]	0.58	6	25	86	336	0.93	16	28.7	0.824	16	29.3	2.155	16	50.1	0.825	15	34.9	2.6	16	38.9	2.289	16	50.3	1.86	16	35.2	1.983	16	56.8	1.851	16	66.8	0.936	18	29.4	0.824	18	25.1	2.01	18	45	0.928	18	20.7	2.339	18	36.2	2.21
Q8WX93	Palladin OS=Homo sapiens GN=PALLD PE=1 SV=3 - [PALLD_HUMAN]	0.6811	18	25	93	403	1.024	34	21	1.119	34	20.1	0.802	34	83.9	1.008	34	12.2	0.711	33	74.8	0.689	32	61.7	0.658	32	74.2	0.661	32	78	0.678	32	72.5	1.101	35	21.7	1.149	35	20.1	0.82	35	71.6	1.086	35	17.4	0.619	33	94.3	0.732
Q92541	RNA polymerase-associated protein RTF1 homolog OS=Homo sapiens GN=RTF1 PE=1 SV=4 - [RTF1_HUMAN]	0.7254	3	25	72	262	0.95	30	15.4	0.952	30	14.3	1.724	30	52.1	0.897	30	18.6	2.045	30	44.1	1.884	30	48.1	2.085	29	54.8	1.826	30	59.6	1.794	29	62.3	0.927	27	22.7	0.901	27	14.3	1.685	27	38	0.954	27	14.5	1.937	27	37.4	1.784
Q96FV9	THO complex subunit 1 OS=Homo sapiens GN=THOC1 PE=1 SV=1 - [THOC1_HUMAN]	0.7489	9	25	60	209	0.92	16	16.3	0.846	16	31.1	1.793	16	30.8	0.923	16	13.2	2.187	16	30.3	1.959	16	45.5	1.569	16	73	1.756	16	45.3	1.474	16	68.4	0.868	19	32.9	0.812	18	31.5	1.695	19	30.6	0.885	19	33.9	2.194	19	37.6	1.995
Q96RP9	Elongation factor G, mitochondrial OS=Homo sapiens GN=GFM1 PE=1 SV=2 - [EFGM_HUMAN]	0.7696	13	25	72	288	1.032	28	14.4	0.961	28	11.2	0.716	28	45.5	1.014	28	11.7	0.605	27	59.3	0.625	28	63	0.68	27	67.4	0.579	26	74.8	0.647	25	51.1	0.975	28	13.8	0.97	28	14.4	0.933	26	44.3	0.99	28	20.3	0.724	24	66	0.772
Q9HCS7	Pre-mRNA-splicing factor SYF1 OS=Homo sapiens GN=XAB2 PE=1 SV=2 - [SYF1_HUMAN]	0.7462	3	25	69	281	0.896	21	20.6	0.772	21	14	1.706	21	49.1	0.853	21	24.8	2.287	21	45.1	2.045	21	39.9	1.771	21	70.6	1.551	20	73	1.84	21	60.7	0.874	21	20.6	0.774	21	29	1.886	21	38.4	0.892	20	23.2	2.266	21	40.6	2.107
Q9NVM9	Protein asunder homolog OS=Homo sapiens GN=ASUN PE=1 SV=2 - [ASUN_HUMAN]	0.7946	9	25	67	253	0.935	27	12.1	0.986	27	25.8	1.548	27	47.7	0.986	27	12.6	1.392	27	48.1	1.198	27	43.6	1.223	27	80.6	1.185	27	65.7	1.178	27	85.3	0.898	27	33	0.928	27	27.3	1.586	27	66.2	0.972	27	18.2	1.48	27	91.8	1.528
Q9UKX7	Nuclear pore complex protein Nup50 OS=Homo sapiens GN=NUP50 PE=1 SV=2 - [NUP50_HUMAN]	0.8226	6	25	45	307	0.897	30	15.7	0.798	30	25.6	1.89	30	39.2	0.844	30	15	1.865	29	38.2	1.917	29	33.3	1.725	28	36.9	1.704	28	44.4	1.595	29	40	0.889	37	20.4	0.862	37	29.7	1.956	37	33.8	0.892	37	24.7	1.94	37	41.9	1.881
Q9Y3A2	Probable U3 small nucleolar RNA-associated protein 11 OS=Homo sapiens GN=UTP11 PE=1 SV=2 - [UTP11_HUMAN]	0.8458	2	25	47	178	0.876	21	32.2	0.846	22	36.7	2.108	22	48.6	0.771	22	34.5	2.589	22	50.9	2.239	22	54.5	4.635	22	68.3	4.305	22	77.9	4.858	22	79.7	0.885	25	18.6	0.843	25	19.7	2.044	25	48.9	0.841	25	15.5	2.412	25	41.2	2.029
Q9Y6D9	Mitotic spindle assembly checkpoint protein MAD1 OS=Homo sapiens GN=MAD1L1 PE=1 SV=2 - [MD1L1_HUMAN]	0.8482	12	25	98	281	0.969	25	15.2	0.947	25	18.2	1.61	25	29	0.964	25	18	1.316	25	36	1.458	25	28.9	1.605	25	51	1.599	25	71.3	1.552	25	75.5	0.94	18	21.7	0.941	18	20.3	1.477	18	25.4	0.982	18	21.1	1.383	17	25.9	1.58
K7ER00	Phenylalanine--tRNA ligase alpha subunit OS=Homo sapiens GN=FARSA PE=1 SV=1 - [K7ER00_HUMAN]	0.6825	7	25	51	242	1.041	28	25.2	1.151	28	13.5	0.778	28	54.6	1.042	28	17.5	0.784	28	64	0.918	28	40.6	0.851	28	82.8	0.864	28	86.5	0.811	27	90.9	1.034	26	18.5	1.133	26	11.1	0.756	26	32.6	1.061	26	17.7	0.653	26	54.6	0.687
B4DJQ5	cDNA FLJ59211, highly similar to Glucosidase 2 subunit beta OS=Homo sapiens PE=2 SV=1 - [B4DJQ5_HUMAN]	0.5383	14	25	40	286	1.005	39	16	1.061	39	8.5	0.898	39	36.6	1.029	39	20.4	0.697	39	57.3	0.749	39	36	0.675	38	101.4	0.847	38	81.7	0.704	38	90.5	0.958	38	25.7	1.051	38	13.7	0.756	38	39.8	1.033	38	20	0.705	38	63.7	0.669
B4DHQ3	Phosphoserine aminotransferase OS=Homo sapiens PE=2 SV=1 - [B4DHQ3_HUMAN]	0.8241	9	25	41	293	1.05	35	17	1.182	35	10.6	0.513	34	49.7	1.08	35	19	0.477	32	91	0.516	33	55.8	0.499	28	102.8	0.463	29	72.4	0.483	28	131.2	1.03	44	24.1	1.134	44	13.2	0.642	43	71.4	1.036	44	18.2	0.588	40	83.8	0.652
A8K800	cDNA FLJ76924, highly similar to Homo sapiens brix domain containing 1 (BXDC1), mRNA OS=Homo sapiens PE=2 SV=1 - [A8K800_HUMAN]	0.8268	13	25	48	283	0.691	38	32.5	0.664	38	48	2.438	38	72.6	0.673	38	50.4	2.55	38	85.8	2.365	38	64.5	3.453	38	85.3	2.789	36	110.6	2.504	38	104.6	0.768	33	30	0.758	33	33.5	1.908	32	46.5	0.79	33	32.6	2.472	33	69.2	1.971
M0QXA7	Protein Wiz OS=Homo sapiens GN=WIZ PE=1 SV=1 - [M0QXA7_HUMAN]	0.6343	6	25	64	223	0.85	21	25.8	0.828	21	38.2	2.057	22	50.9	0.851	21	31.8	2.266	20	58.6	2.143	21	62.3	2.166	20	47.9	2.399	20	39.3	2.358	19	58.1	0.856	24	26.3	0.923	24	26.9	1.704	24	39.1	0.954	22	22.1	1.889	24	39.8	1.845
Q15637-5	Isoform 5 of Splicing factor 1 OS=Homo sapiens GN=SF1 - [SF01_HUMAN]	0.4889	19	25	52	363	0.935	44	20.6	0.878	44	22.4	1.662	44	48.2	0.892	44	26.9	1.906	44	64.3	1.645	44	49.5	1.806	44	65.3	1.64	43	62.2	1.929	44	65.7	0.921	46	21.4	0.819	46	26.7	1.846	45	66.1	0.869	46	23.5	2.156	45	70.5	1.782
A0A0C4DGS5	Golgi autoantigen, golgin subfamily a, 2, isoform CRA_a OS=Homo sapiens GN=GOLGA2 PE=1 SV=1 - [A0A0C4DGS5_HUMAN]	0.7152	9	25	85	304	1.003	19	16.4	0.909	19	15.1	1.069	19	36.1	1.057	19	15.3	1.065	19	54.6	1.004	18	36.5	1.028	18	49	1.038	18	41.1	0.95	19	63.9	1.039	17	11	1.006	17	5.8	1.103	17	24.6	1.073	17	11.9	1.075	17	44.7	1.015
A0A087X2H1	E3 ubiquitin-protein ligase HECTD1 OS=Homo sapiens GN=HECTD1 PE=1 SV=1 - [A0A087X2H1_HUMAN]	0.5493	13	25	141	457	1.104	19	12.7	1.095	19	7.6	0.666	19	36.6	1.065	19	7.9	0.805	18	52.9	0.729	19	64.3	0.754	18	39	0.779	18	36.6	0.825	17	42.4	1.194	16	18.6	1.203	16	14.3	0.829	16	39.5	1.109	16	15.5	0.872	14	44.5	0.823
A0A024RC87	Ribonuclease/angiogenin inhibitor 1, isoform CRA_a OS=Homo sapiens GN=RNH1 PE=4 SV=1 - [A0A024RC87_HUMAN]	0.9123	11	25	40	274	1.02	38	22.3	1.076	38	18	0.674	36	76.5	1.133	38	16.8	0.542	37	99.1	0.56	35	71.8	0.657	34	93.8	0.707	33	99.1	0.608	34	105.1	1.027	35	16.9	1.123	35	15	0.518	34	59.2	1.084	35	14.2	0.471	34	94.3	0.55
V9HW77	Epididymis luminal protein 211 OS=Homo sapiens GN=HEL-211 PE=2 SV=1 - [V9HW77_HUMAN]	0.9764	9	25	39	504	1.001	66	23.1	1.148	66	15.1	0.53	64	77.9	1.052	66	20	0.514	58	125.7	0.498	63	88.9	0.448	57	143.3	0.478	50	106.4	0.442	56	101.5	0.996	69	18.4	1.117	68	13.1	0.573	64	52.9	1.027	69	13.4	0.582	63	75.3	0.539
Q15084-5	Isoform 5 of Protein disulfide-isomerase A6 OS=Homo sapiens GN=PDIA6 - [PDIA6_HUMAN]	0.7951	7	24	56	359	1.087	45	19.5	1.07	45	17	0.947	44	32.8	1.083	45	21.3	0.797	41	42.8	0.885	42	41.1	0.718	39	70.1	0.744	38	56.5	0.671	39	43	1.149	45	24.2	1.11	45	17.5	1.04	45	27.4	1.103	45	22.6	0.947	43	61.1	0.839
O15347	High mobility group protein B3 OS=Homo sapiens GN=HMGB3 PE=1 SV=4 - [HMGB3_HUMAN]	0.92	6	24	40	329	0.849	34	20.1	0.829	33	14.2	1.864	34	53	0.774	33	25.6	2.111	34	45.4	1.822	34	44.3	1.412	34	56.1	1.303	34	61.7	1.305	34	53.6	0.819	29	28.2	0.85	29	17.2	1.68	28	37.3	0.831	29	13.8	2.295	28	57.2	1.816
O43491	Band 4.1-like protein 2 OS=Homo sapiens GN=EPB41L2 PE=1 SV=1 - [E41L2_HUMAN]	0.7463	25	24	85	269	1.023	18	28.7	1.064	18	14	0.762	18	51.9	1.107	18	18.6	0.801	17	75.2	0.676	18	87.6	0.575	18	121.9	0.759	17	119.3	0.673	17	174.1	1.102	18	23.9	1.088	18	6.6	0.614	17	42.6	1.055	18	12.9	0.56	17	58	0.657
O43847-2	Isoform 2 of Nardilysin OS=Homo sapiens GN=NRDC - [NRDC_HUMAN]	0.4811	14	24	64	240	1.06	19	19.9	1.092	19	14.4	0.718	15	72.2	0.974	19	23.6	0.538	15	84.7	0.811	19	49.3	0.763	15	47.9	0.603	15	68.5	0.864	17	51.9	1.003	18	23.1	1.081	18	22.6	0.65	15	59.3	0.944	18	20.9	0.734	14	54.7	0.731
O60869	Endothelial differentiation-related factor 1 OS=Homo sapiens GN=EDF1 PE=1 SV=1 - [EDF1_HUMAN]	0.9865	3	24	38	218	1.056	29	26.4	1.075	29	13.3	1.691	29	46.1	0.991	29	24.1	1.889	29	53.2	1.764	29	53.2	2.725	29	72.7	2.587	29	86.8	2.5	29	83.7	0.98	33	23.3	1.028	33	14.6	1.766	33	45.7	0.918	33	16.6	2.101	33	52	1.808
O75521	Enoyl-CoA delta isomerase 2, mitochondrial OS=Homo sapiens GN=ECI2 PE=1 SV=4 - [ECI2_HUMAN]	0.8452	14	24	40	238	1.13	26	20.5	1.029	26	12.3	0.854	26	51.4	1.103	26	9.8	0.606	26	80.1	0.835	26	60.3	0.763	24	83.5	0.836	25	90.4	0.706	25	88	0.97	27	12.6	0.977	27	9.5	0.932	27	41.4	1.069	27	11.8	0.886	27	140.4	0.812
O75937	DnaJ homolog subfamily C member 8 OS=Homo sapiens GN=DNAJC8 PE=1 SV=2 - [DNJC8_HUMAN]	0.8854	2	24	39	162	0.902	22	17	0.89	22	20.1	1.328	22	80.9	0.904	22	20.6	1.563	22	95	1.654	22	67.4	1.06	22	86.7	1.22	21	76.9	1.228	21	103.5	0.954	20	24.1	0.931	20	24.5	1.543	20	67	0.825	20	26.5	1.824	20	95.2	1.468
P08758	Annexin A5 OS=Homo sapiens GN=ANXA5 PE=1 SV=2 - [ANXA5_HUMAN]	0.9031	6	24	37	238	1.044	28	20.1	1.017	28	12.1	1.8	28	46.9	0.888	28	18.8	1.385	28	75.3	1.596	28	53.7	0.9	28	84.1	0.811	26	107.7	0.707	28	103.7	1.194	31	30.6	1.033	31	13.6	1.913	31	51.2	0.963	31	25.4	1.307	31	71.3	1.904
P10155	60 kDa SS-A/Ro ribonucleoprotein OS=Homo sapiens GN=TROVE2 PE=1 SV=2 - [RO60_HUMAN]	0.8346	10	24	50	209	0.941	22	23.7	1.003	22	16	0.518	21	79.1	0.969	22	14.1	0.487	18	78.1	0.495	21	100.8	0.517	17	102	0.52	16	57.6	0.488	17	69.6	1.034	26	22.9	1.062	26	16.7	0.632	26	47.1	1.039	26	16.1	0.596	24	58.6	0.572
P19525	Interferon-induced, double-stranded RNA-activated protein kinase OS=Homo sapiens GN=EIF2AK2 PE=1 SV=2 - [E2AK2_HUMAN]	0.7314	8	24	50	229	1.033	23	18.9	1.104	23	15.6	1.096	23	59.9	0.986	23	20.9	1.085	22	66.6	1.08	23	61.9	1.14	21	49.4	1.198	21	57.3	1.051	22	91.1	0.963	25	22.5	1.023	25	21.7	1.068	25	49.7	1.012	25	15.8	1.223	25	47.3	1.094
P22087	rRNA 2'-O-methyltransferase fibrillarin OS=Homo sapiens GN=FBL PE=1 SV=2 - [FBRL_HUMAN]	0.8442	13	24	39	609	0.87	79	27.6	0.82	77	33.4	2.02	81	65	0.804	79	34.4	2.361	82	63.8	2.048	81	62.6	3.919	81	91.4	3.961	81	99.2	3.583	82	92.1	0.834	84	29.2	0.788	82	35.2	2.07	86	63.3	0.797	84	40	2.348	85	62.8	1.986
P25789	Proteasome subunit alpha type-4 OS=Homo sapiens GN=PSMA4 PE=1 SV=1 - [PSA4_HUMAN]	0.9042	13	24	35	353	0.913	51	29	1.102	51	9.3	0.55	47	64.7	0.974	51	20.3	0.61	45	78.3	0.61	48	77.9	0.693	42	77.5	0.722	40	88.6	0.697	40	86.5	0.864	48	23.3	1.072	48	10.8	0.603	45	50.9	0.975	47	24.7	0.626	44	60.6	0.639
P27635	60S ribosomal protein L10 OS=Homo sapiens GN=RPL10 PE=1 SV=4 - [RL10_HUMAN]	0.8879	13	24	42	405	1.129	58	21.8	1.07	58	13.7	0.798	57	59.1	1.108	58	17.9	0.769	57	65.7	0.842	56	48	0.745	56	90	0.671	55	96.5	0.713	55	99.3	1.115	56	18.4	1.108	56	15.9	0.811	54	61.5	1.133	56	21.9	0.713	53	56.4	0.738
P30041	Peroxiredoxin-6 OS=Homo sapiens GN=PRDX6 PE=1 SV=3 - [PRDX6_HUMAN]	0.9732	3	24	37	435	0.948	68	27	1.139	68	16.6	0.42	63	89	0.998	68	26.2	0.396	60	104.8	0.455	64	76.6	0.448	56	91.3	0.409	53	106.4	0.447	53	138	0.949	71	36.7	1.128	71	14.1	0.572	62	70.4	0.973	71	23.9	0.453	63	102	0.506
P31153	S-adenosylmethionine synthase isoform type-2 OS=Homo sapiens GN=MAT2A PE=1 SV=1 - [METK2_HUMAN]	0.6152	11	24	39	230	1.002	35	14.1	1.094	35	15.1	0.669	33	62.7	1.074	35	18.3	0.638	33	95	0.71	33	64.1	0.657	32	101.6	0.725	30	100.5	0.816	30	87.2	1.053	33	21.3	1.144	33	11.9	0.572	32	48.1	1.08	33	19.5	0.498	29	76.1	0.545
P31930	Cytochrome b-c1 complex subunit 1, mitochondrial OS=Homo sapiens GN=UQCRC1 PE=1 SV=3 - [QCR1_HUMAN]	0.8375	3	24	43	310	1.051	42	17.5	1.016	43	11.4	0.796	43	41.3	1.024	43	11.3	0.762	41	63.9	0.731	43	49.6	0.712	40	85.9	0.695	39	70.5	0.595	36	115	0.978	39	12.8	0.994	39	14	0.848	39	43.6	1.026	39	17.4	0.688	38	43.4	0.736
P35659	Protein DEK OS=Homo sapiens GN=DEK PE=1 SV=1 - [DEK_HUMAN]	0.8907	9	24	62	299	0.784	31	19.4	0.752	31	26.6	2.345	31	37	0.763	31	24.8	2.664	31	47.2	2.39	31	46.3	2.119	31	39.5	2.036	31	47	1.936	31	36.5	0.722	31	34	0.7	30	33.4	2.467	31	41.9	0.726	30	23.4	2.765	31	58	2.458
P40429	60S ribosomal protein L13a OS=Homo sapiens GN=RPL13A PE=1 SV=2 - [RL13A_HUMAN]	0.8916	11	24	45	311	1.083	43	23	1.077	43	14.9	0.685	42	54.1	1.114	43	15.9	0.778	42	70.8	0.774	42	65.5	0.78	39	78.3	0.745	36	85.1	0.783	36	82.2	1.059	42	25.5	1.196	42	13.2	0.74	42	56.4	1.127	42	20.3	0.724	39	63.3	0.761
P48637	Glutathione synthetase OS=Homo sapiens GN=GSS PE=1 SV=1 - [GSHB_HUMAN]	0.8291	5	24	47	255	1.075	26	17.4	1.13	26	11.7	0.532	25	48.4	1.005	26	14.2	0.593	26	98.5	0.63	24	72.2	0.807	23	89.7	0.846	22	100.7	0.731	22	101.2	1.04	20	23.7	1.079	20	13.2	0.703	17	47.1	1.074	20	13.9	0.807	17	66	0.836
P50213	Isocitrate dehydrogenase [NAD] subunit alpha, mitochondrial OS=Homo sapiens GN=IDH3A PE=1 SV=1 - [IDH3A_HUMAN]	0.7404	15	24	39	194	1.083	21	16.9	1.066	21	7.7	0.669	21	33.3	1.017	21	16.2	0.561	21	34.1	0.625	21	41.6	0.497	19	81.3	0.432	19	86.8	0.45	19	16.9	1.037	23	27.4	1.051	23	9.3	0.718	23	51.5	1.083	23	20.3	0.564	22	77	0.551
P54819	Adenylate kinase 2, mitochondrial OS=Homo sapiens GN=AK2 PE=1 SV=2 - [KAD2_HUMAN]	0.9331	12	24	35	404	0.983	57	21	1.03	57	16	0.715	55	44.2	1.039	56	26.1	0.597	53	56.6	0.623	54	33.4	0.539	52	87.1	0.599	48	97.7	0.542	49	90.3	1.011	63	19.4	1.037	63	18.8	0.771	61	29.1	1.061	63	18.8	0.612	59	51.1	0.662
P55010	Eukaryotic translation initiation factor 5 OS=Homo sapiens GN=EIF5 PE=1 SV=2 - [IF5_HUMAN]	0.7935	11	24	41	252	0.992	33	20.2	1.092	33	7.8	1.063	33	40.9	1.054	33	15.4	1.001	33	63.3	1.007	33	37.8	0.636	33	112.3	0.791	32	97	0.824	31	71.8	0.977	33	13.5	1.125	33	7.7	0.781	33	58	1.061	33	11.9	0.843	33	81.2	0.847
P56182	Ribosomal RNA processing protein 1 homolog A OS=Homo sapiens GN=RRP1 PE=1 SV=1 - [RRP1_HUMAN]	0.6464	6	24	49	317	0.848	41	31.1	0.859	40	35.4	1.742	41	54.7	0.911	40	25.9	2.198	41	68.5	2.255	41	69.1	2.88	41	78.9	2.509	41	85.4	2.626	41	102	0.863	45	32.4	0.847	44	27.3	1.757	45	57.1	0.922	43	39	1.97	45	67.4	1.96
P62081	40S ribosomal protein S7 OS=Homo sapiens GN=RPS7 PE=1 SV=1 - [RS7_HUMAN]	0.8763	3	24	31	975	0.987	122	23.5	1.106	122	17.2	0.643	112	69.7	1.072	122	24.5	0.582	104	104	0.616	111	88.9	0.596	85	94.9	0.693	80	101.9	0.588	85	124.9	0.985	123	29.2	1.076	123	20.4	0.677	115	73.2	1.052	122	28.7	0.597	110	89.1	0.654
Q06210	Glutamine--fructose-6-phosphate aminotransferase [isomerizing] 1 OS=Homo sapiens GN=GFPT1 PE=1 SV=3 - [GFPT1_HUMAN]	0.7668	8	24	67	260	1.018	24	17.6	1.133	24	10.5	0.545	24	56.7	1.066	24	21.5	0.583	22	66.3	0.654	23	40.6	0.617	23	81.3	0.669	21	64.4	0.503	23	71.4	0.98	28	27.2	1.093	28	13.8	0.69	28	71.7	1.027	28	16	0.584	28	85	0.552
Q07955	Serine/arginine-rich splicing factor 1 OS=Homo sapiens GN=SRSF1 PE=1 SV=2 - [SRSF1_HUMAN]	0.7823	10	24	43	471	0.882	78	25.5	0.842	78	28.6	2.067	77	52.4	0.894	78	28.4	2.209	77	61.5	1.959	78	55.9	2.326	76	71.8	2.256	77	78.7	2.05	77	61.5	0.901	78	28.8	0.884	78	34	2.009	79	52.5	0.903	78	29	2.392	78	56.6	2.097
Q13310-3	Isoform 3 of Polyadenylate-binding protein 4 OS=Homo sapiens GN=PABPC4 - [PABP4_HUMAN]	0.8167	18	24	71	540	0.965	29	16	1.136	29	11.1	0.525	28	48.4	0.951	29	17.6	0.49	28	40.2	0.553	28	35.5	0.462	27	82.6	0.473	27	144.8	0.442	26	117.2	0.944	31	19.2	1.093	31	11.1	0.638	31	51.8	0.959	31	13.9	0.596	30	64.2	0.639
Q13561	Dynactin subunit 2 OS=Homo sapiens GN=DCTN2 PE=1 SV=4 - [DCTN2_HUMAN]	0.9551	13	24	43	263	1.023	29	22.3	1.129	27	8.8	0.603	27	62.1	1.04	29	18.2	0.515	25	59.8	0.526	25	49.7	0.499	25	119.4	0.484	22	84.4	0.493	24	101.8	1.024	29	29.5	1.085	29	11.6	0.681	28	51.9	1.121	29	24.6	0.582	26	129.8	0.688
Q14166	Tubulin--tyrosine ligase-like protein 12 OS=Homo sapiens GN=TTLL12 PE=1 SV=2 - [TTL12_HUMAN]	0.677	3	24	40	186	1.058	24	19.5	1.078	24	12.8	0.844	24	39.7	1.064	24	22.9	0.889	22	53.3	0.844	24	52.5	0.78	23	85.1	0.949	23	68.3	0.95	23	82.9	1.066	22	21.8	1.012	22	17	0.795	20	23.1	1.172	22	22.2	0.801	20	61.7	0.889
Q14444	Caprin-1 OS=Homo sapiens GN=CAPRIN1 PE=1 SV=2 - [CAPR1_HUMAN]	0.4824	4	24	47	342	0.96	39	22.2	1.101	39	8.4	0.694	38	57.8	0.989	39	14.5	0.621	38	55	0.614	38	59.9	0.484	37	85.7	0.572	35	163.7	0.637	37	119.3	0.942	39	18.1	1.086	39	15.1	0.669	39	51.9	0.968	39	18.1	0.637	38	75.4	0.637
Q15181	Inorganic pyrophosphatase OS=Homo sapiens GN=PPA1 PE=1 SV=2 - [IPYR_HUMAN]	0.9446	3	24	31	309	1.053	44	19.1	1.154	44	12.9	0.533	44	52.5	1.13	44	17.2	0.491	40	56.3	0.515	43	57.1	0.514	39	94.9	0.574	37	92.9	0.543	40	106.3	1.046	43	15	1.145	43	16.4	0.506	40	57.4	1.099	43	22.9	0.454	38	90.6	0.485
Q68CP9	AT-rich interactive domain-containing protein 2 OS=Homo sapiens GN=ARID2 PE=1 SV=2 - [ARID2_HUMAN]	0.4866	10	24	88	360	0.749	17	59.6	0.753	17	38.1	1.999	16	22.7	0.735	17	59.2	1.876	18	32.9	2.14	18	30.2	1.834	17	33.7	1.649	16	53.5	1.646	16	44.1	0.918	21	37.4	0.761	21	40.3	2.186	21	65	0.859	21	32.7	2.495	20	54.6	2.328
Q8IVT2	Mitotic interactor and substrate of PLK1 OS=Homo sapiens GN=MISP PE=1 SV=1 - [MISP_HUMAN]	0.6937	1	24	53	209	1.106	24	14.8	1.063	24	17.3	1.017	24	46.4	1.041	24	10.6	0.913	24	52.5	0.948	24	49.5	0.969	24	63.3	1.144	24	66.4	1.035	24	41.6	1.097	21	20.4	1.177	21	12.9	0.872	21	35.3	1.128	21	18	0.749	21	85.9	0.886
Q8IY37	Probable ATP-dependent RNA helicase DHX37 OS=Homo sapiens GN=DHX37 PE=1 SV=1 - [DHX37_HUMAN]	0.6422	3	24	107	305	0.781	20	27.6	0.865	20	22.9	1.536	20	43.9	0.804	20	17	1.799	19	45.6	1.714	20	34.6	1.906	20	64.4	1.613	20	92.9	1.885	19	36.6	0.731	22	29	0.848	22	25.5	1.439	22	30.3	0.757	22	32.4	1.799	21	64.2	1.615
Q96AG4	Leucine-rich repeat-containing protein 59 OS=Homo sapiens GN=LRRC59 PE=1 SV=1 - [LRC59_HUMAN]	0.8208	2	24	42	337	1.069	37	29.3	0.944	37	23.7	0.836	36	107	1.07	37	25.1	0.863	34	88.8	0.922	36	49.9	0.676	33	87.4	0.73	31	111.9	0.672	32	123	1.05	41	22.9	0.904	41	20.7	0.81	40	39.8	1.017	41	21.7	0.791	40	80.2	0.886
Q96I25	Splicing factor 45 OS=Homo sapiens GN=RBM17 PE=1 SV=1 - [SPF45_HUMAN]	0.9152	5	24	53	232	0.833	29	17.9	0.823	29	21.7	2.3	28	48.9	0.883	29	22.2	2.657	28	49.1	2.168	29	61.9	2.339	27	33.1	2.204	28	50.7	2.132	28	44.9	0.896	27	26.9	0.909	27	23	2.164	27	41.3	0.887	27	26.3	2.31	27	61.4	1.919
Q96ST2	Protein IWS1 homolog OS=Homo sapiens GN=IWS1 PE=1 SV=2 - [IWS1_HUMAN]	0.823	7	24	87	293	0.825	20	30.4	0.91	20	25.6	1.513	20	37.8	0.96	20	33.4	1.799	20	43.7	1.737	20	26.4	1.356	18	31.7	1.503	18	38.7	1.792	20	59.1	0.88	21	24.5	0.953	21	16.6	1.407	20	26	0.856	20	20.5	1.672	21	36.5	1.67
Q96TA1	Niban-like protein 1 OS=Homo sapiens GN=FAM129B PE=1 SV=3 - [NIBL1_HUMAN]	0.7601	5	24	58	284	0.955	22	17.6	1.028	22	8.9	0.603	22	49.8	1.029	22	21	0.638	22	98.7	0.589	22	42.3	0.593	20	80.4	0.697	18	63.3	0.592	18	71.2	0.885	26	17	0.943	26	12.7	0.707	26	66.4	0.927	26	14.5	0.636	23	76.1	0.644
Q99497	Protein deglycase DJ-1 OS=Homo sapiens GN=PARK7 PE=1 SV=2 - [PARK7_HUMAN]	0.9735	3	24	33	428	1.003	58	20.7	1.163	58	9.5	0.589	57	75.9	1.039	58	16.7	0.546	56	106.7	0.667	57	74.5	0.618	53	115.9	0.658	53	121	0.611	52	120.8	0.988	54	21.7	1.137	54	14.5	0.581	52	70.7	1.058	54	20.1	0.491	48	107.6	0.563
Q99623	Prohibitin-2 OS=Homo sapiens GN=PHB2 PE=1 SV=2 - [PHB2_HUMAN]	0.9565	10	24	42	358	0.863	48	27.1	0.886	48	9.8	0.695	46	41.1	0.944	47	19.4	0.587	45	49	0.615	46	39.6	0.562	44	78.8	0.507	43	96.8	0.488	43	113.8	0.871	50	25.8	0.915	50	18.4	0.779	49	52.1	0.942	49	20.2	0.564	47	60	0.626
Q9NQW6	Anillin OS=Homo sapiens GN=ANLN PE=1 SV=2 - [ANLN_HUMAN]	0.7135	10	24	100	289	0.994	17	17	1.07	17	12	1.233	17	54.1	1	17	19.9	1.181	17	31.5	1.144	17	46.6	1.183	17	38.3	1.29	17	61.2	1.231	16	63.4	0.95	15	22.4	1.027	15	14.4	1.141	15	39.8	0.938	15	18.4	1.245	15	25.3	1.117
Q9NVX2	Notchless protein homolog 1 OS=Homo sapiens GN=NLE1 PE=1 SV=4 - [NLE1_HUMAN]	0.8454	8	24	43	236	0.909	30	27.2	0.957	30	22.5	1.477	30	52.6	0.943	30	14	1.463	30	61.8	1.605	30	70.5	2.123	30	62.1	2.266	30	68.4	1.844	29	59.7	0.936	36	21.7	0.995	35	19	1.502	36	80.8	0.984	36	20.5	1.402	36	92	1.295
Q9NY93	Probable ATP-dependent RNA helicase DDX56 OS=Homo sapiens GN=DDX56 PE=1 SV=1 - [DDX56_HUMAN]	0.7861	18	24	59	263	0.922	30	43.2	0.866	30	24.9	1.532	30	68.2	0.991	30	36	2.192	28	80.8	1.902	29	73.5	2.681	28	94.7	2.169	29	71.6	2.233	28	69.3	0.913	31	25.1	0.824	31	25	1.466	32	57.9	0.877	33	37.4	1.789	32	74.2	1.752
Q9UKS6	Protein kinase C and casein kinase substrate in neurons protein 3 OS=Homo sapiens GN=PACSIN3 PE=1 SV=2 - [PACN3_HUMAN]	0.8962	9	24	53	251	1.018	30	24.6	1.059	30	17.8	0.894	27	84.4	1.041	30	18.4	0.92	26	75.6	0.849	29	57	0.77	27	88.7	0.94	26	121.9	0.948	26	115.3	1.007	29	21	1.046	29	12.4	0.97	27	52.8	1.04	28	26	0.994	29	72.5	0.835
Q9UPQ0	LIM and calponin homology domains-containing protein 1 OS=Homo sapiens GN=LIMCH1 PE=1 SV=4 - [LIMC1_HUMAN]	0.7276	27	24	108	289	1.017	21	16.1	1.142	21	9.6	0.922	21	47.9	1.007	21	18.4	0.873	21	46.5	0.954	21	33.3	1.011	21	49.8	0.934	21	57.8	0.999	21	52.8	0.973	19	13.4	1.101	19	15.1	0.768	18	55.4	1.008	19	12.9	0.732	18	87.4	0.712
J3QK86	Bromodomain adjacent to zinc finger domain, 2A, isoform CRA_a OS=Homo sapiens GN=BAZ2A PE=4 SV=1 - [J3QK86_HUMAN]	0.4971	10	24	106	335	0.907	21	31.6	0.717	21	40.1	2.257	21	51.2	0.835	21	34.2	2.675	21	46	2.336	21	47.6	2.057	20	62.3	1.555	21	84.5	1.678	19	68.8	0.852	19	23.2	0.797	19	20.4	1.734	19	47	0.81	19	28.5	2.253	19	45.1	2.063
Q6NVW7	Importin subunit alpha OS=Homo sapiens GN=KPNA2 PE=2 SV=1 - [Q6NVW7_HUMAN]	0.7524	6	24	44	427	0.918	51	21.2	0.911	50	19	1.194	49	37.3	0.941	51	20.5	1.174	48	46.7	1.227	50	41.8	1.116	45	72.9	1.066	48	63.7	0.898	44	77.6	0.933	50	17.7	0.977	50	16.5	1.095	48	44.6	0.935	49	25.6	1.146	49	46.7	1.212
B7Z852	cDNA FLJ61730, highly similar to Histone-lysine N-methyltransferase, H3 lysine-9 specific 3 (EC 2.1.1.43) OS=Homo sapiens PE=2 SV=1 - [B7Z852_HUMAN]	0.6691	13	24	91	263	0.999	22	32.1	0.848	21	36.2	1.577	22	46.3	0.834	21	28.3	1.853	21	56.5	1.699	21	56	1.516	21	88.1	1.569	20	108.5	1.49	21	99.4	0.896	22	24.9	0.865	21	17.2	1.577	22	36.3	0.85	21	12.4	1.695	21	88.4	1.58
H9A532	BCL6 corepressor-cyclin B3 fusion protein OS=Homo sapiens PE=2 SV=1 - [H9A532_HUMAN]	0.628	15	24	187	480	0.963	21	21.3	0.842	21	29.1	1.718	21	32.5	0.874	21	22.3	1.905	21	49	1.543	21	37.8	1.839	21	62.3	1.506	20	53.8	1.782	21	55	0.919	18	19.5	0.883	18	30.6	2.014	18	47.9	0.947	18	24.6	2.123	18	56.7	1.982
J3KQ32	Obg-like ATPase 1 OS=Homo sapiens GN=OLA1 PE=1 SV=1 - [J3KQ32_HUMAN]	0.8077	9	24	40	319	1.079	30	12.2	1.133	30	9.4	0.706	30	53.7	1.036	30	10.9	0.658	29	72.8	0.659	30	53.9	0.845	28	93.8	0.777	28	92.9	0.76	29	106	1.025	32	16	1.163	32	9.6	0.573	30	80.9	1.024	32	15.1	0.723	29	115.2	0.692
A8KAK1	cDNA FLJ77398, highly similar to Homo sapiens UDP-glucose ceramide glucosyltransferase-like 1, transcript variant 2, mRNA OS=Homo sapiens PE=2 SV=1 - [A8KAK1_HUMAN]	0.6277	3	24	98	391	0.97	25	16.6	0.884	25	11.9	0.86	25	58.8	0.99	25	12	0.847	24	46.2	0.836	25	63.9	0.981	23	67.8	0.961	21	62.8	0.87	23	73.7	1.01	27	12.3	0.832	27	21.9	0.837	27	43.3	1.022	27	21.8	0.893	26	45.7	0.828
A0A0F7KYT8	Fragile X mental retardation autosomal homolog variant p2K OS=Homo sapiens GN=FXR1 PE=2 SV=1 - [A0A0F7KYT8_HUMAN]	0.8552	24	24	78	276	1.004	22	20.7	1.021	22	15.2	0.765	22	56.3	1.037	22	14.9	0.686	22	91.3	0.707	22	66.1	0.598	22	124.2	0.604	22	131.9	0.617	22	117.7	0.962	22	23.5	1.06	22	11.8	0.703	22	56.3	1.007	22	17.3	0.632	22	84	0.62
O95425-4	Isoform SV4 of Supervillin OS=Homo sapiens GN=SVIL - [SVIL_HUMAN]	0.6618	10	24	178	472	1.08	14	14	1.074	14	9.3	1.005	14	44.1	1.068	14	11.9	0.857	14	28.2	0.985	14	28	1.069	14	61.6	0.991	14	58.8	0.873	14	60.9	0.97	14	19.8	0.954	13	11.4	0.959	14	29.2	0.996	13	15.7	1.047	14	30.6	0.934
A0A087WZ13	Ribonucleoprotein PTB-binding 1 OS=Homo sapiens GN=RAVER1 PE=1 SV=1 - [A0A087WZ13_HUMAN]	0.7591	7	24	44	207	1.1	27	23.7	1.007	27	22.6	1.466	26	42.4	1.017	26	22.6	1.191	27	48.4	1.27	27	59.9	0.954	24	83.7	0.942	24	91.3	0.989	24	106	0.933	27	32.6	0.878	27	20.6	1.334	27	37.9	0.92	27	30.7	1.158	27	57.3	1.19
A0A024R972	Laminin, gamma 1 (Formerly LAMB2), isoform CRA_a OS=Homo sapiens GN=LAMC1 PE=4 SV=1 - [A0A024R972_HUMAN]	0.6643	20	24	115	401	0.914	18	11.9	0.945	18	11.9	0.992	18	43.1	1.009	17	8.5	0.845	18	59.1	0.768	17	57.5	0.862	18	65.2	0.9	18	74.1	0.856	17	48	0.983	19	11.9	0.966	19	11.1	0.968	18	40.4	0.954	19	15.6	0.853	19	66.3	0.881
C9J0Q5	Nuclear receptor corepressor 2 OS=Homo sapiens GN=NCOR2 PE=1 SV=2 - [C9J0Q5_HUMAN]	0.5172	18	23	148	437	0.941	17	23.9	0.895	17	17	1.275	17	34.8	0.94	17	15.1	1.324	17	39.5	1.311	17	40.8	1.186	17	45	1.201	17	81.5	1.205	17	79.9	0.926	16	23.4	1.047	16	15.1	1.233	16	16.7	1.007	16	11.8	1.301	16	45.3	1.147
C9JIF9	Acylamino-acid-releasing enzyme OS=Homo sapiens GN=APEH PE=1 SV=1 - [C9JIF9_HUMAN]	0.6187	7	23	45	167	1.108	20	16.1	1.089	20	11.7	0.824	20	43.7	1.122	20	14.4	0.731	20	73.9	0.681	20	53.7	0.673	19	72.6	0.733	19	102.2	0.757	18	61.3	1.141	15	15.8	1.063	15	14.4	0.725	15	30.5	1.066	15	10	0.719	15	44.9	0.737
Q5JRX3-2	Isoform 2 of Presequence protease, mitochondrial OS=Homo sapiens GN=PITRM1 - [PREP_HUMAN]	0.7225	14	23	72	219	0.956	17	12	0.968	17	15.5	0.876	17	43.4	0.952	17	20.7	0.638	17	47.3	0.754	17	36.9	0.666	17	47.9	0.729	16	86.1	0.68	17	97	0.975	14	14.8	0.959	14	9	0.769	14	42.8	0.968	14	13.4	0.797	14	69	0.668
E5KLJ5	Dynamin-like 120 kDa protein, mitochondrial OS=Homo sapiens GN=OPA1 PE=1 SV=1 - [E5KLJ5_HUMAN]	0.7241	18	23	105	315	0.92	17	14.2	0.957	17	11.6	0.847	17	44.3	0.93	17	12.3	0.693	17	68.1	0.786	17	52.4	0.629	16	75.9	0.457	17	58.5	0.689	17	81	1.008	20	20.2	0.89	20	22.3	0.745	19	27.6	1.058	20	19	0.588	20	57.3	0.667
Q13439-5	Isoform 5 of Golgin subfamily A member 4 OS=Homo sapiens GN=GOLGA4 - [GOGA4_HUMAN]	0.7419	17	23	239	569	1.068	14	18.6	1.206	14	18.1	0.73	13	53.2	1.094	14	18.8	0.735	12	71.4	0.759	12	52.5	0.693	11	73.7	0.724	11	59.7	0.898	11	68.4	1.078	16	9.5	1.125	16	12	0.909	14	64.2	1.112	16	14.5	0.9	14	59.6	0.927
O60216	Double-strand-break repair protein rad21 homolog OS=Homo sapiens GN=RAD21 PE=1 SV=2 - [RAD21_HUMAN]	0.5927	11	23	46	322	0.892	35	31.6	0.868	33	29.9	1.948	34	34.9	0.936	35	22.2	1.707	34	64.6	1.674	35	61.1	1.824	33	50.4	1.755	32	59.1	1.685	32	35.3	0.85	34	23.9	0.905	34	31.5	1.715	35	40.4	0.889	35	35.2	1.744	35	58.6	1.616
O60701	UDP-glucose 6-dehydrogenase OS=Homo sapiens GN=UGDH PE=1 SV=1 - [UGDH_HUMAN]	0.836	12	23	43	222	1.096	22	9.7	1.178	22	14.7	0.647	21	44.8	1.123	23	14.4	0.628	20	61.4	0.664	21	45.9	0.891	19	56.5	0.756	20	48.4	0.825	18	51.2	1.094	20	26.8	1.185	20	12.6	0.572	20	34.2	1.152	20	13.7	0.478	20	63.6	0.6
O75683	Surfeit locus protein 6 OS=Homo sapiens GN=SURF6 PE=1 SV=3 - [SURF6_HUMAN]	0.7562	23	23	49	207	0.762	19	42.6	0.817	19	40.7	2.303	19	87	0.768	19	21.5	3.413	19	76.1	3.003	19	87.7	5.281	19	95.3	4.966	19	102.5	5.124	19	107.1	0.809	23	27.3	0.743	22	42.9	2.099	22	45.2	0.766	23	31.8	2.974	22	37.9	2.467
O94880	PHD finger protein 14 OS=Homo sapiens GN=PHF14 PE=1 SV=2 - [PHF14_HUMAN]	0.705	4	23	73	304	0.842	26	28.9	0.794	24	26.9	2.285	26	55.9	0.825	26	34.9	2.512	26	65.5	2.372	26	78	2.602	26	57.4	2.206	25	87.8	2.403	26	60.6	0.744	29	48.1	0.779	28	36.7	2.451	29	29.5	0.796	28	42.7	2.653	29	34.3	2.385
O95373	Importin-7 OS=Homo sapiens GN=IPO7 PE=1 SV=1 - [IPO7_HUMAN]	0.5058	4	23	52	227	1.129	25	26.6	1.108	25	11.1	0.717	22	48	1.008	25	31.7	0.744	24	81.8	0.771	23	73.1	0.764	19	97.1	0.89	19	64.1	0.967	18	82.5	0.973	25	38.6	1.01	24	10.6	0.725	22	54.2	1.028	25	25.3	0.932	19	39.9	0.719
P07942	Laminin subunit beta-1 OS=Homo sapiens GN=LAMB1 PE=1 SV=2 - [LAMB1_HUMAN]	0.5403	8	23	96	304	1.122	16	15.4	1.002	16	14.2	1.033	16	30.9	1.039	16	22.7	0.872	16	51.1	1.017	16	49.5	0.85	16	46.1	0.864	16	65.3	0.85	15	64.2	0.919	19	11.5	0.93	19	17.1	0.995	18	38.2	0.911	19	20.9	0.913	18	41.4	1.045
P08238	Heat shock protein HSP 90-beta OS=Homo sapiens GN=HSP90AB1 PE=1 SV=4 - [HS90B_HUMAN]	0.8052	8	23	121	3944	1.004	80	30.5	1.133	80	12.8	0.471	74	86.6	1.05	79	19.7	0.431	66	129.9	0.453	71	70.2	0.357	62	122.2	0.395	58	89	0.403	60	79.2	0.989	69	21.7	1.149	69	13.6	0.424	64	80.4	1.032	69	18.4	0.402	61	105.6	0.441
P16403	Histone H1.2 OS=Homo sapiens GN=HIST1H1C PE=1 SV=2 - [H12_HUMAN]	0.9484	3	23	68	1256	0.695	44	53.3	0.469	42	92.5	5.881	45	141.8	0.682	42	51.7	6.852	45	130.1	5.995	45	121.8	7.941	45	153.8	7.164	45	137.9	8.498	45	157.7	0.744	42	53	0.571	40	75	5.053	42	126.9	0.689	40	60.8	7.067	41	129	5.185
P17174	Aspartate aminotransferase, cytoplasmic OS=Homo sapiens GN=GOT1 PE=1 SV=3 - [AATC_HUMAN]	0.9419	3	23	48	293	1.015	34	20.1	1.133	34	10.6	0.62	33	40	1.082	34	17.8	0.596	32	52.1	0.616	33	48.3	0.555	30	67.5	0.577	30	78.5	0.654	29	51.9	1.063	32	14.7	1.134	32	10.5	0.58	31	51.4	1.069	32	18.3	0.441	31	75.3	0.536
P21266	Glutathione S-transferase Mu 3 OS=Homo sapiens GN=GSTM3 PE=1 SV=3 - [GSTM3_HUMAN]	0.8578	6	23	32	267	0.903	37	28.4	1.072	37	10.7	0.548	36	69.4	0.964	37	23.8	0.504	36	130.5	0.6	36	70	0.634	33	69.1	0.482	34	64.2	0.537	34	99.7	0.914	36	24.1	1.081	37	10.9	0.524	36	56.3	0.979	36	22.4	0.54	36	58.3	0.544
P23526	Adenosylhomocysteinase OS=Homo sapiens GN=AHCY PE=1 SV=4 - [SAHH_HUMAN]	0.787	3	23	37	439	1.008	56	36.3	1.108	56	12.7	0.582	54	38.6	1.016	56	18.3	0.549	50	56.1	0.619	54	39.9	0.614	50	66.6	0.527	49	67.9	0.561	50	83.2	1.009	62	26.2	1.115	62	12.2	0.567	59	41	1.055	62	23.7	0.509	57	53.4	0.553
P25786	Proteasome subunit alpha type-1 OS=Homo sapiens GN=PSMA1 PE=1 SV=1 - [PSA1_HUMAN]	0.9734	7	23	36	360	1.042	46	16.8	1.1	46	10	0.697	46	56.1	1.013	46	19	0.691	45	68.7	0.69	45	58.4	0.651	44	86	0.597	44	82.1	0.594	44	87	1.033	46	14.3	1.082	46	14.9	0.751	46	34.3	1.08	46	14.2	0.756	46	76.9	0.725
P35249	Replication factor C subunit 4 OS=Homo sapiens GN=RFC4 PE=1 SV=2 - [RFC4_HUMAN]	0.9146	11	23	39	212	0.897	26	15	0.893	26	18.9	1.657	24	48	0.927	26	28.6	1.782	26	56.4	1.509	25	33.5	1.871	25	64.9	1.873	23	52.2	1.78	24	41.4	1.013	27	23.2	0.948	27	19.7	1.62	26	43.9	1.001	26	23	1.618	26	49.8	1.577
P0DN79	Cystathionine beta-synthase-like protein OS=Homo sapiens GN=CBSL PE=1 SV=1 - [CBSL_HUMAN]	0.9328	10	23	55	217	1.06	24	23.2	1.074	24	11.8	0.588	23	54.6	1.067	24	21.8	0.663	19	57.1	0.584	22	86.1	0.771	21	48.3	0.703	19	70.5	0.725	19	57.3	1.074	27	23.4	1.091	27	13.5	0.869	26	54	1.089	27	24.1	0.778	24	60.2	0.847
P37837	Transaldolase OS=Homo sapiens GN=TALDO1 PE=1 SV=2 - [TALDO_HUMAN]	0.6142	6	23	38	309	1.002	37	14.1	1.123	37	12.6	0.512	37	44.8	1.07	37	11.4	0.486	34	75.1	0.562	34	46.9	0.556	29	66.6	0.623	27	61.2	0.577	29	67.1	1.007	35	17.7	1.09	35	15.8	0.564	35	39.8	1.016	35	17.7	0.505	32	36.1	0.484
P49589-3	Isoform 3 of Cysteine--tRNA ligase, cytoplasmic OS=Homo sapiens GN=CARS - [SYCC_HUMAN]	0.6775	13	23	68	261	1.02	27	14.6	1.107	27	13.4	0.703	26	33.7	1.083	27	13.2	0.667	25	83.6	0.687	26	38.3	0.731	23	38	0.697	24	58.5	0.727	22	44.4	1.052	24	25.8	1.093	24	16.1	0.697	23	55.4	1.095	24	19.6	0.639	23	61.2	0.64
P50502	Hsc70-interacting protein OS=Homo sapiens GN=ST13 PE=1 SV=2 - [F10A1_HUMAN]	0.6206	13	23	39	365	1.025	51	21.9	1.156	51	16.7	0.614	48	53.3	1.045	51	14.7	0.539	47	61.3	0.715	47	52.8	0.6	44	82.8	0.675	44	77.2	0.639	43	69.8	1.022	48	19.6	1.133	48	9.3	0.574	46	63.1	1.038	48	15.2	0.553	43	86.2	0.593
P61158	Actin-related protein 3 OS=Homo sapiens GN=ACTR3 PE=1 SV=3 - [ARP3_HUMAN]	0.8086	14	23	35	261	0.949	46	23.1	1.015	46	14.6	0.709	46	66.5	0.936	46	14.9	0.684	46	63.1	0.697	46	62.8	0.667	45	126.6	0.679	45	92.5	0.656	45	115.9	0.957	43	21.7	1.038	43	11.6	0.727	43	59.4	0.939	43	12.1	0.738	43	76.6	0.707
P62269	40S ribosomal protein S18 OS=Homo sapiens GN=RPS18 PE=1 SV=3 - [RS18_HUMAN]	0.9539	4	23	35	497	0.93	55	21.7	1.094	55	11.6	0.711	54	55.8	0.973	55	18.7	0.645	52	57.7	0.671	53	53.5	0.507	52	106.1	0.474	52	65.7	0.54	49	59.4	0.93	55	29.7	1.057	55	15.1	0.69	54	50.1	0.996	55	21.5	0.683	52	91.3	0.706
P62917	60S ribosomal protein L8 OS=Homo sapiens GN=RPL8 PE=1 SV=2 - [RL8_HUMAN]	0.7237	6	23	34	365	1.112	50	19.6	1.099	50	13	0.936	49	47.7	1.13	50	16.9	0.926	48	35.3	0.962	50	43.9	0.962	48	70.4	0.923	48	66.3	1.057	49	50	1.108	45	17.8	1.128	46	14.4	0.912	45	34.4	1.106	46	18.1	0.848	46	43.2	0.818
P78406	mRNA export factor OS=Homo sapiens GN=RAE1 PE=1 SV=1 - [RAE1L_HUMAN]	0.8777	6	23	36	477	0.888	50	32.4	0.851	50	38.2	1.848	50	52.3	0.867	50	29	1.859	50	58.8	1.791	50	50.8	1.91	50	74.4	1.518	49	76.2	1.701	50	83.9	0.891	50	32.3	0.848	49	29.8	1.961	50	56.4	0.893	49	30.6	1.962	50	74.3	1.77
Q00653-4	Isoform 4 of Nuclear factor NF-kappa-B p100 subunit OS=Homo sapiens GN=NFKB2 - [NFKB2_HUMAN]	0.6107	4	23	61	221	0.965	20	13.9	1.05	20	9.5	0.977	20	55.2	1.017	20	12.9	0.902	20	90.4	0.837	20	43.8	0.984	19	107	0.888	19	123.6	0.76	20	67.5	0.978	20	16.6	1.062	20	12.6	1.029	20	50.4	1.036	20	10.8	1.045	20	64.9	0.97
Q13177	Serine/threonine-protein kinase PAK 2 OS=Homo sapiens GN=PAK2 PE=1 SV=3 - [PAK2_HUMAN]	0.8263	21	23	45	246	1.075	28	16.3	1.157	28	13.9	0.672	27	49.6	1.13	28	13.1	0.625	27	63	0.677	28	45.9	0.593	28	64.9	0.632	26	70.7	0.642	27	66.8	1.126	37	15.6	1.137	37	12.5	0.618	37	43.5	1.141	37	12	0.58	36	53.1	0.688
Q13347	Eukaryotic translation initiation factor 3 subunit I OS=Homo sapiens GN=EIF3I PE=1 SV=1 - [EIF3I_HUMAN]	0.9446	4	23	41	328	1.103	40	17.9	1.166	40	15.9	0.533	40	65.1	1.086	40	19.6	0.523	38	95.2	0.619	40	65.4	0.581	36	79.8	0.548	36	106.7	0.547	38	81.6	1.015	36	13.5	1.152	36	16.8	0.554	35	35.4	1.063	36	15	0.544	34	60.4	0.679
Q15642-2	Isoform 2 of Cdc42-interacting protein 4 OS=Homo sapiens GN=TRIP10 - [CIP4_HUMAN]	0.6532	10	23	44	198	1.124	22	16.7	1.142	22	14.3	0.843	22	40.7	1.13	22	8.5	0.782	20	44.9	0.892	20	34.4	0.832	20	82.9	0.835	20	51.3	0.737	20	43.4	1.113	27	15.1	1.133	27	11.2	0.78	27	31.3	1.157	27	22	0.772	26	45.5	0.851
Q32MZ4-3	Isoform 3 of Leucine-rich repeat flightless-interacting protein 1 OS=Homo sapiens GN=LRRFIP1 - [LRRF1_HUMAN]	0.7154	7	23	66	318	1.002	22	15.1	1.167	22	9.4	0.682	22	61.6	1.033	22	13.1	0.501	20	67.9	0.63	20	67.2	0.733	19	118.1	0.807	17	79.9	0.68	19	129.4	0.956	21	24.1	1.194	20	12.3	0.684	19	26.8	0.969	20	24.4	0.724	20	56.3	0.7
Q5SSJ5	Heterochromatin protein 1-binding protein 3 OS=Homo sapiens GN=HP1BP3 PE=1 SV=1 - [HP1B3_HUMAN]	0.7071	7	23	65	279	0.838	34	24.6	0.773	34	26.8	3.039	34	69.8	0.796	34	23.9	3.474	34	67	2.661	34	59.6	2.333	34	78.2	2.325	32	74.8	2.876	34	72.3	0.788	26	21.8	0.773	26	25.3	2.687	26	51.5	0.797	25	21.7	3.052	26	49.6	2.608
Q7L1Q6	Basic leucine zipper and W2 domain-containing protein 1 OS=Homo sapiens GN=BZW1 PE=1 SV=1 - [BZW1_HUMAN]	0.716	14	23	46	283	1.06	32	24.2	1.023	32	11.9	0.88	30	68.6	1.033	32	19.7	0.871	32	70.9	0.909	32	80.7	0.827	30	82.2	0.807	29	45.1	0.802	29	81.1	1.015	30	21.2	1.043	30	16.5	0.816	29	41.5	1.02	30	19.5	0.921	30	45.2	0.921
Q7Z2T5	TRMT1-like protein OS=Homo sapiens GN=TRMT1L PE=1 SV=2 - [TRM1L_HUMAN]	0.704	5	23	59	236	0.835	18	30	0.854	18	31.3	1.298	18	21.8	0.815	17	27.4	1.637	17	36	1.454	17	43.6	1.832	18	31.1	1.591	17	39.4	1.712	18	32.8	0.895	19	12.3	0.934	19	16	1.421	19	27.5	0.891	19	19.5	1.756	19	26.2	1.603
Q7Z3K3-5	Isoform 5 of Pogo transposable element with ZNF domain OS=Homo sapiens GN=POGZ - [POGZ_HUMAN]	0.5665	10	23	75	287	0.875	21	42.4	0.871	20	35.9	2.285	21	51.5	0.819	20	45.5	2.705	21	61.7	2.536	21	41.9	2.102	20	38	1.827	19	57.3	1.974	20	44	0.809	21	25.7	0.806	21	41.2	2.263	20	40.6	0.826	20	25.4	2.558	20	69.9	2.146
Q7Z5J4	Retinoic acid-induced protein 1 OS=Homo sapiens GN=RAI1 PE=1 SV=2 - [RAI1_HUMAN]	0.511	6	23	109	302	0.803	17	38.8	0.792	16	24.8	1.914	17	58.1	0.787	16	25.2	2.292	17	84.7	2.184	17	60.4	2.74	17	136.5	2.227	17	94	2.594	17	117.1	0.895	17	21.9	0.831	15	31.2	1.743	16	40.9	0.82	16	23	1.967	17	45.9	1.829
Q92973	Transportin-1 OS=Homo sapiens GN=TNPO1 PE=1 SV=2 - [TNPO1_HUMAN]	0.5969	9	23	48	498	1	51	24.5	1.036	51	16.2	0.821	46	56.2	0.985	51	16.3	0.722	43	59.9	0.791	47	52.8	0.579	39	128	0.637	36	82.9	0.63	34	110.2	1.039	47	17.5	1.04	47	11.5	0.748	47	54.8	0.997	47	16.3	0.723	46	45.9	0.835
Q9BQ67	Glutamate-rich WD repeat-containing protein 1 OS=Homo sapiens GN=GRWD1 PE=1 SV=1 - [GRWD1_HUMAN]	0.6883	6	23	29	262	0.944	36	20.2	0.949	36	27.2	1.314	36	47	0.97	36	24.3	1.313	36	63.4	1.294	35	58.3	2.166	35	85.5	2.15	36	87.7	2.333	35	76.6	0.988	37	29.3	0.917	36	33.8	1.404	36	45.3	0.959	36	25.3	1.565	36	39.7	1.46
Q9BWU0	Kanadaptin OS=Homo sapiens GN=SLC4A1AP PE=1 SV=1 - [NADAP_HUMAN]	0.7073	5	23	61	266	0.968	24	27	0.984	24	15.5	1.091	24	37.2	0.971	24	19.7	1.07	24	38.6	1.042	24	42.7	0.977	24	56.5	0.929	23	66.1	0.927	23	61.2	0.926	24	23.9	0.976	24	18.4	1.286	24	41.5	0.984	24	20.3	1.358	24	85.7	1.302
Q9HC38-2	Isoform 2 of Glyoxalase domain-containing protein 4 OS=Homo sapiens GN=GLOD4 - [GLOD4_HUMAN]	0.7752	17	23	33	195	0.92	30	19.2	1.115	30	12.6	0.532	28	57.7	1.04	30	18.1	0.408	29	81.8	0.62	29	61.5	0.58	24	70.3	0.496	28	50.6	0.611	26	91.7	1.038	29	21.5	1.207	29	19.3	0.525	28	54.5	1.084	29	17.3	0.541	24	95.4	0.561
Q9NVN8	Guanine nucleotide-binding protein-like 3-like protein OS=Homo sapiens GN=GNL3L PE=1 SV=1 - [GNL3L_HUMAN]	0.7354	2	23	56	233	0.968	24	19	0.989	24	7.8	1.422	24	33.8	1.006	24	26.3	1.651	24	31.4	1.502	24	34.7	1.784	24	60.7	1.75	23	87	1.527	24	43.4	1.029	22	23	0.987	21	20.7	1.438	22	30.8	0.968	22	16.8	1.6	22	44.4	1.387
Q9UBE0	SUMO-activating enzyme subunit 1 OS=Homo sapiens GN=SAE1 PE=1 SV=1 - [SAE1_HUMAN]	0.9422	11	23	37	228	0.974	30	15.1	1.103	30	10	0.638	29	38.9	1.007	30	17.4	0.618	27	69.2	0.565	28	47.4	0.621	25	79.6	0.626	24	92.4	0.751	25	70.5	1.055	30	16.7	1.112	30	7.7	0.474	28	53.4	1.038	30	18.1	0.448	26	92	0.484
Q9UHD1	Cysteine and histidine-rich domain-containing protein 1 OS=Homo sapiens GN=CHORDC1 PE=1 SV=2 - [CHRD1_HUMAN]	0.8855	13	23	38	260	1.077	33	23.5	1.136	33	8.8	0.654	33	48.9	1.087	33	16.4	0.557	33	75.6	0.634	33	54.2	0.559	32	80.7	0.576	30	71.8	0.632	30	70	1.04	35	18.4	1.145	35	14.6	0.67	35	66.3	1.04	35	20.4	0.541	35	77.6	0.647
Q9UMY1	Nucleolar protein 7 OS=Homo sapiens GN=NOL7 PE=1 SV=2 - [NOL7_HUMAN]	0.5837	3	23	38	242	0.837	31	29.1	0.862	31	33.7	2.336	31	49.3	0.797	31	30.9	2.873	31	46.6	2.537	31	42.9	3.641	31	70	3.334	31	87.8	4.307	31	78.9	0.785	28	36.7	0.878	30	20.6	1.921	30	54.9	0.756	28	34.2	2.312	29	58.9	2.101
Q9UNE7	E3 ubiquitin-protein ligase CHIP OS=Homo sapiens GN=STUB1 PE=1 SV=2 - [CHIP_HUMAN]	0.8878	9	23	40	245	1.082	29	13.2	1.114	29	14.2	1.035	29	53.5	1.113	29	17.8	1.126	28	63.7	1.079	29	59.4	1.217	29	85.3	1.132	27	114.6	0.975	29	90.1	1.036	30	13.5	1.108	30	13	1.014	29	86.4	1.083	30	18.1	0.986	29	92.1	1.038
Q9UNF0	Protein kinase C and casein kinase substrate in neurons protein 2 OS=Homo sapiens GN=PACSIN2 PE=1 SV=2 - [PACN2_HUMAN]	0.7819	7	23	53	233	1.006	24	18.8	1.033	24	15.7	0.989	23	39.8	1.079	24	24.5	0.902	23	52.2	1.009	23	45.1	0.878	22	75.4	0.821	22	66.1	0.74	23	91.5	0.9	26	28.8	1.049	26	12.4	0.774	26	53.3	0.956	26	18.5	0.731	25	47.4	0.751
Q9Y224	UPF0568 protein C14orf166 OS=Homo sapiens GN=C14orf166 PE=1 SV=1 - [CN166_HUMAN]	0.959	5	23	33	299	0.939	40	25.6	1.037	40	11.6	0.91	38	54.5	0.943	40	25.5	0.785	36	99.1	0.801	38	50.5	0.634	31	125	0.561	31	77.4	0.66	32	116.1	0.869	42	29	0.95	42	19.2	0.972	40	58.2	0.932	42	23.9	0.81	38	60	0.939
Q9Y3B9	RRP15-like protein OS=Homo sapiens GN=RRP15 PE=1 SV=2 - [RRP15_HUMAN]	0.7234	3	23	45	331	0.898	33	16	0.91	31	24.2	2.512	33	49.2	0.894	31	22.3	3.176	33	71.1	2.77	33	69.7	6.08	33	80.4	6.788	33	89.3	7.669	33	81.5	0.918	36	34	0.847	35	21	2.477	36	37.6	0.849	35	18.8	2.982	36	51.6	2.554
B3KS98	Eukaryotic translation initiation factor 3 subunit H OS=Homo sapiens GN=EIF3H PE=1 SV=1 - [B3KS98_HUMAN]	0.9071	12	23	45	279	1.025	29	16	1.103	29	12.3	0.629	28	47.3	1.029	29	23.2	0.466	28	86.6	0.617	28	49.6	0.523	27	92.6	0.506	26	99.6	0.493	26	111.4	1.095	31	18.3	1.196	31	12	0.608	28	39.3	1.057	31	16.3	0.483	28	64.5	0.551
A8K6Q4	cDNA FLJ76888, highly similar to Homo sapiens RNA binding motif protein 6 (RBM6), mRNA OS=Homo sapiens PE=2 SV=1 - [A8K6Q4_HUMAN]	0.6768	12	23	125	313	0.949	14	28.8	0.836	14	33.6	1.997	14	33.1	0.909	14	27.3	2.202	14	57.6	2.105	14	60.3	2.435	14	57.8	2.124	13	50.3	2.47	13	51.1	0.892	17	20.3	0.801	17	36.8	2.351	17	50.5	0.821	17	30.6	2.653	17	42.7	2.179
J3KQE5	GTP-binding nuclear protein Ran (Fragment) OS=Homo sapiens GN=RAN PE=1 SV=1 - [J3KQE5_HUMAN]	0.9274	8	23	31	447	0.993	67	23.2	1.04	66	15.7	0.901	64	44.9	0.987	67	23.5	0.868	63	42.2	0.884	65	33.5	0.744	63	63	0.705	60	78	0.682	59	78.3	0.947	65	13.7	1.029	65	14.8	0.895	63	34.4	0.975	65	16.8	0.899	63	45.9	0.808
J3KNL6	Protein transport protein Sec16A OS=Homo sapiens GN=SEC16A PE=1 SV=1 - [J3KNL6_HUMAN]	0.4412	18	23	80	284	0.969	18	22.1	0.918	18	20.7	0.911	17	40.6	1.088	18	23.9	0.9	17	50.9	0.981	17	72.2	1.018	17	96	0.873	17	101.5	1.081	16	71.9	1.083	18	15.7	1.081	18	19.8	0.827	17	65.2	1.07	18	19.2	0.753	17	59	0.861
Q6NZ55	60S ribosomal protein L13 OS=Homo sapiens GN=RPL13 PE=1 SV=1 - [Q6NZ55_HUMAN]	0.8057	9	23	37	387	1.086	49	24.1	1.106	49	12.6	0.97	48	31.6	1.05	49	16.2	1.114	49	45.2	1.083	48	37.8	1.015	47	60	1.018	47	55.7	1.167	46	52.2	0.99	47	30	1.079	47	11.1	0.917	47	50.6	0.967	47	19	1.053	46	52	1.018
B2R665	cDNA, FLJ92810, highly similar to Homo sapiens protein phosphatase 1G (formerly 2C), magnesium-dependent, gamma isoform (PPM1G), mRNA OS=Homo sapiens PE=2 SV=1 - [B2R665_HUMAN]	0.7253	6	23	44	317	0.974	40	15.8	1.117	40	14.7	0.693	38	73.4	1.033	40	12.4	0.655	36	86.4	0.639	38	80.2	0.626	36	131.6	0.53	38	179.5	0.548	35	121.4	1.005	41	16	1.127	41	18.4	0.627	40	106.6	1.053	41	11.1	0.611	38	134.6	0.63
B7ZLW0	LPP protein OS=Homo sapiens GN=LPP PE=2 SV=1 - [B7ZLW0_HUMAN]	0.6324	16	23	37	218	1.209	23	17.3	1.25	23	23.1	0.714	22	60.8	1.161	23	26.3	0.81	23	50.9	0.706	22	50.8	0.776	21	115.5	0.901	19	69.2	0.844	19	127.6	1.061	23	14.1	1.158	23	12.8	0.712	23	52.9	1.093	23	17	0.794	23	73.8	0.771
J3QR07	YTH domain-containing protein 1 OS=Homo sapiens GN=YTHDC1 PE=1 SV=1 - [J3QR07_HUMAN]	0.498	6	23	58	267	0.915	24	23.9	0.741	24	44.7	3.254	25	76	0.863	24	37.7	3.515	25	88.2	3.023	25	93.7	4.459	25	96.9	3.468	25	105.4	3.129	25	76.2	0.829	28	23.3	0.736	28	36.9	2.953	28	73.1	0.774	27	32.8	3.184	28	78	2.803
Q6I7N8	Lymphoid specific helicase variant9 OS=Homo sapiens GN=HELLS PE=2 SV=1 - [Q6I7N8_HUMAN]	0.7182	17	23	75	274	0.863	20	32.8	0.78	20	30.1	1.686	20	42	0.818	20	46.4	2.16	20	56.6	2.102	20	37.3	1.991	20	57.6	1.704	19	35.2	1.36	19	58.5	0.792	18	16.5	0.725	19	20.4	1.814	19	36.4	0.859	19	40.6	1.882	19	44.9	1.966
B4DZQ5	cDNA FLJ51417, highly similar to Serine/threonine-protein kinase PRP4 homolog (EC 2.7.11.1) OS=Homo sapiens PE=2 SV=1 - [B4DZQ5_HUMAN]	0.6788	4	23	100	398	0.794	29	32.3	0.712	29	28.8	2.368	29	44.1	0.831	29	19.5	2.68	29	45.7	2.51	29	38.2	2.22	28	51	1.628	29	52	1.71	29	54.6	0.746	29	32.5	0.793	29	45.9	1.81	29	44.4	0.839	29	29	2.224	29	34.9	1.874
A8K4Z4	60S acidic ribosomal protein P0 OS=Homo sapiens PE=2 SV=1 - [A8K4Z4_HUMAN]	0.7539	20	23	33	379	1.001	54	16.9	1.088	55	17.7	0.705	53	50	1.014	55	20.3	0.676	51	76	0.753	54	55	0.711	49	123.6	0.681	46	95	0.599	47	112.2	0.875	49	22.7	1.033	49	16.1	0.71	47	45.2	0.959	49	22.3	0.64	44	62.8	0.637
A8KA74	cDNA FLJ76065 OS=Homo sapiens PE=2 SV=1 - [A8KA74_HUMAN]	0.6056	5	23	73	295	0.797	25	31.6	0.837	23	19.2	1.739	25	36	0.89	24	26.9	2.641	24	36.9	2.327	25	58.8	3.741	24	70.3	2.757	23	49.9	2.99	25	53.8	0.766	24	20.4	0.765	23	36.3	1.532	25	36.7	0.808	24	17.5	2.256	25	42.7	2.183
A0A087X1N8	Serpin B6 OS=Homo sapiens GN=SERPINB6 PE=1 SV=1 - [A0A087X1N8_HUMAN]	0.957	5	23	45	449	1.061	47	18.5	1.198	47	12.5	0.539	44	33.7	1.092	47	19	0.565	40	69.6	0.561	44	60.8	0.519	40	66.4	0.604	38	63.8	0.623	40	51.7	1.037	53	21.6	1.14	53	19.4	0.537	50	60	1.069	52	17.2	0.506	47	75.5	0.554
A0A0G2JPP5	Protein scribble homolog OS=Homo sapiens GN=SCRIB PE=1 SV=1 - [A0A0G2JPP5_HUMAN]	0.5263	12	23	93	287	1.031	14	22.2	1.101	14	16.8	0.564	14	48.1	0.996	14	27.2	0.641	12	34.8	0.576	14	79.4	0.443	13	75.7	0.446	11	112.3	0.453	14	107	1.076	16	15.9	1.061	16	12.9	0.708	15	38.3	1.075	15	12.4	0.638	15	66.8	0.756
A0A024R233	Tight junction protein 2 (Zona occludens 2), isoform CRA_a OS=Homo sapiens GN=TJP2 PE=4 SV=1 - [A0A024R233_HUMAN]	0.7504	14	23	110	333	1.08	19	8.6	1.124	19	17.5	0.836	19	45.8	1.041	19	9.3	0.815	19	71.8	0.93	19	53.4	0.97	19	90.3	0.63	17	114	0.784	18	61.8	1.006	19	7.9	1.039	19	17.4	0.713	19	51.4	1.022	19	9.8	0.901	19	86.7	0.85
A0MZ66	Shootin-1 OS=Homo sapiens GN=SHTN1 PE=1 SV=4 - [SHOT1_HUMAN]	0.8621	10	22	69	243	0.973	13	7.2	1.108	14	17.9	0.818	13	86.6	1.003	14	18.1	0.759	13	117.6	0.757	14	47.7	0.75	13	42.4	0.722	13	73.6	0.682	13	47.7	0.992	18	13.3	1.1	18	14	0.603	18	26.8	1.022	18	9.9	0.694	17	27.5	0.619
P40925-3	Isoform 3 of Malate dehydrogenase, cytoplasmic OS=Homo sapiens GN=MDH1 - [MDHC_HUMAN]	0.6136	8	22	35	357	1.081	53	19.6	1.172	53	12.3	0.457	52	49.8	1.12	53	17.3	0.395	50	66.4	0.496	51	51.6	0.454	50	80.9	0.489	49	112	0.506	49	99.3	1.1	50	17	1.148	50	11.7	0.436	49	67.4	1.098	50	15.4	0.362	48	106.2	0.432
O00469-2	Isoform 2 of Procollagen-lysine,2-oxoglutarate 5-dioxygenase 2 OS=Homo sapiens GN=PLOD2 - [PLOD2_HUMAN]	0.715	9	22	68	262	1.044	19	11.4	1.064	19	16.5	1.046	19	59.8	1.073	19	17.7	0.938	19	43.8	0.912	19	60.7	0.901	18	98.1	0.927	17	78.4	0.87	18	29.9	0.998	17	20.3	1.014	17	16	0.871	16	38.1	1	17	16.3	0.761	15	64.5	0.841
O14579	Coatomer subunit epsilon OS=Homo sapiens GN=COPE PE=1 SV=3 - [COPE_HUMAN]	0.8604	7	22	32	229	1.032	32	15.7	1.009	32	10.2	0.891	31	39.4	1.031	32	19.6	0.835	31	55.3	0.881	32	27.4	0.805	30	59.6	0.743	29	60.5	0.854	27	55.9	1.043	32	20.5	1.015	32	15.3	0.925	32	34.9	1.018	32	12.3	0.804	32	64.4	0.777
O75131	Copine-3 OS=Homo sapiens GN=CPNE3 PE=1 SV=1 - [CPNE3_HUMAN]	0.6499	8	22	41	190	0.976	24	20.8	0.999	24	15.4	0.844	24	32.1	0.994	24	17.8	0.875	24	34.5	0.845	24	23.8	0.786	24	71.4	0.723	22	66.9	0.684	23	88.3	0.936	20	13.6	1.064	20	10.5	0.844	20	31.4	0.978	20	14.6	0.786	20	32.6	0.798
O75376	Nuclear receptor corepressor 1 OS=Homo sapiens GN=NCOR1 PE=1 SV=2 - [NCOR1_HUMAN]	0.5639	25	22	163	464	0.979	13	11.4	1.01	13	16.9	1.681	13	27.1	0.885	13	19.1	1.781	13	28.8	1.518	13	28.2	1.656	13	21.2	1.693	13	18.8	1.595	13	27.5	1.022	14	24.4	1.01	13	14.8	1.767	13	35.9	1.139	14	18.6	1.949	12	35.5	1.694
O95391	Pre-mRNA-splicing factor SLU7 OS=Homo sapiens GN=SLU7 PE=1 SV=2 - [SLU7_HUMAN]	0.7969	5	22	71	221	0.853	12	14	0.872	12	45.2	1.845	12	57.8	0.88	12	20.2	1.977	12	63	2.382	12	30.5	2.552	13	52.4	1.963	12	91.1	2.727	12	40	0.823	21	21.8	0.671	21	30.8	2.235	21	50.9	0.721	21	25.7	2.434	21	62.2	2.306
P08133	Annexin A6 OS=Homo sapiens GN=ANXA6 PE=1 SV=3 - [ANXA6_HUMAN]	0.8692	15	22	88	548	0.829	28	23.2	0.94	27	10	0.935	28	36	0.885	28	22.9	0.915	27	51	0.965	27	39.9	0.909	27	44.6	0.778	28	63.6	0.828	27	43	0.789	27	18.9	0.931	28	11.4	0.814	28	42.7	0.908	28	24	0.83	28	49.1	0.82
P09543	2',3'-cyclic-nucleotide 3'-phosphodiesterase OS=Homo sapiens GN=CNP PE=1 SV=2 - [CN37_HUMAN]	0.7268	8	22	46	189	1.063	21	15.2	0.984	21	12.2	0.688	21	22.4	1.042	22	15	0.628	21	39.8	0.691	21	22.1	0.593	20	43	0.628	20	62.9	0.641	21	77.2	1.041	20	16.9	0.999	20	5.9	0.572	20	35.9	1.05	20	10.4	0.551	19	45.8	0.56
P11310-2	Isoform 2 of Medium-chain specific acyl-CoA dehydrogenase, mitochondrial OS=Homo sapiens GN=ACADM - [ACADM_HUMAN]	0.7835	16	22	48	282	1.073	33	14.4	1.025	33	14.9	0.879	33	52.1	0.99	33	17.4	0.714	32	105.2	0.756	32	69.3	0.648	29	168.3	0.643	27	151.8	0.757	27	118.5	1.07	33	20.8	1.054	32	13.1	0.923	30	35.5	1.049	33	20.4	0.676	32	87.7	0.737
P13861	cAMP-dependent protein kinase type II-alpha regulatory subunit OS=Homo sapiens GN=PRKAR2A PE=1 SV=2 - [KAP2_HUMAN]	0.9109	8	22	41	208	1.046	22	13.3	1.073	22	18.1	0.802	21	18	1.062	22	17.8	0.692	20	58.6	0.701	20	44.7	0.665	19	81	0.723	19	81.5	0.777	19	88.1	1.126	23	13.6	1.06	23	10.5	0.863	23	39.9	1.08	23	13.9	0.62	23	86.4	0.75
P19784	Casein kinase II subunit alpha' OS=Homo sapiens GN=CSNK2A2 PE=1 SV=1 - [CSK22_HUMAN]	0.78	4	22	34	231	0.925	28	20	0.871	29	18.5	1.378	29	33.8	0.95	28	20.3	1.423	28	33.3	1.276	28	45.8	1.764	28	68.3	1.553	28	53.6	1.6	28	52.6	0.933	28	27.3	0.876	28	19.1	1.632	27	42.9	0.938	26	20.4	1.484	27	52.3	1.452
P22059	Oxysterol-binding protein 1 OS=Homo sapiens GN=OSBP PE=1 SV=1 - [OSBP1_HUMAN]	0.7943	5	22	72	236	0.986	18	22.3	1.101	18	18.6	0.781	18	36.6	1.004	18	19.6	0.76	16	32.4	0.813	18	36.1	0.716	16	72.3	0.608	17	66.5	0.627	17	62.1	1.058	17	26.1	1.035	17	16.5	0.607	16	48	0.989	17	8.7	0.488	15	32.4	0.558
P26196	Probable ATP-dependent RNA helicase DDX6 OS=Homo sapiens GN=DDX6 PE=1 SV=2 - [DDX6_HUMAN]	0.913	15	22	55	294	1.032	32	21.2	1.063	32	15.9	0.832	31	55.3	0.997	32	23.1	0.718	30	48.5	0.739	32	41.7	0.787	30	81.4	0.824	29	91	0.665	29	135.9	1.021	22	23.7	1.084	22	14.9	0.733	19	45.1	0.899	22	26.2	0.651	19	73.4	0.878
P28288	ATP-binding cassette sub-family D member 3 OS=Homo sapiens GN=ABCD3 PE=1 SV=1 - [ABCD3_HUMAN]	0.6404	8	22	58	205	0.991	17	26.3	0.707	17	21.1	0.582	16	60.2	0.941	17	8.2	0.542	16	78.3	0.595	17	51.3	0.509	15	152.3	0.571	14	116.8	0.561	14	135.6	1.094	19	17.4	0.815	19	28.5	0.647	19	28.3	0.986	19	12.5	0.576	19	37.7	0.638
P42224	Signal transducer and activator of transcription 1-alpha/beta OS=Homo sapiens GN=STAT1 PE=1 SV=2 - [STAT1_HUMAN]	0.7347	11	22	60	261	1.094	17	25.6	1.118	17	18.4	0.655	16	38.1	1.076	17	10.5	0.614	17	43.4	0.687	17	51.4	0.643	15	87.7	0.58	16	64.2	0.643	16	44.7	1.213	18	21.8	1.14	18	12.7	0.607	17	77.6	1.143	18	14.9	0.651	15	94.8	0.553
P52597	Heterogeneous nuclear ribonucleoprotein F OS=Homo sapiens GN=HNRNPF PE=1 SV=3 - [HNRPF_HUMAN]	0.8024	3	22	37	785	0.926	90	29.3	0.943	89	25.2	1.774	90	48.4	0.92	90	26.7	1.943	89	66.2	1.705	90	54.8	1.657	85	86.5	1.553	84	77.4	1.689	85	79.3	0.938	86	24.8	0.892	86	17.8	1.715	87	49	0.932	86	33.7	1.987	87	63.2	1.766
P53618	Coatomer subunit beta OS=Homo sapiens GN=COPB1 PE=1 SV=3 - [COPB_HUMAN]	0.6737	4	22	69	214	1.022	18	13.7	0.853	18	14.8	0.894	18	53.2	1.011	18	14.2	0.94	17	36.2	0.937	18	42.5	1.123	17	75.2	0.961	18	69.5	1.099	18	55	1.082	19	17.3	0.915	19	12.9	1.024	18	65.2	1.052	19	16.5	0.909	18	82.9	0.949
P62701	40S ribosomal protein S4, X isoform OS=Homo sapiens GN=RPS4X PE=1 SV=2 - [RS4X_HUMAN]	0.8859	5	22	48	580	0.816	56	27.4	0.958	56	11.8	0.615	56	45.1	0.91	56	21.4	0.606	55	45.5	0.624	55	47.6	0.635	56	51.5	0.65	52	65.9	0.667	53	84	0.909	59	27	0.969	59	15	0.721	58	54.4	1.038	59	29	0.626	59	78.8	0.676
Q06124	Tyrosine-protein phosphatase non-receptor type 11 OS=Homo sapiens GN=PTPN11 PE=1 SV=2 - [PTN11_HUMAN]	0.7856	9	22	67	209	0.978	20	26.5	1.079	19	12	0.595	20	51.6	1	19	24.8	0.542	19	76.2	0.707	19	68.3	0.7	17	60.3	0.709	17	71	0.632	18	85.9	0.957	16	25.6	1.091	16	8.4	0.616	15	52.1	1.056	16	14.8	0.596	13	53.3	0.612
Q12996	Cleavage stimulation factor subunit 3 OS=Homo sapiens GN=CSTF3 PE=1 SV=1 - [CSTF3_HUMAN]	0.6904	8	22	60	235	0.882	21	17.4	0.887	21	16.3	1.589	21	32.1	0.854	21	24.3	1.75	21	28.9	1.854	21	24.8	1.428	21	49.9	1.168	21	56.2	1.238	21	66.7	0.904	19	12.2	0.887	19	12.8	1.411	19	37.8	0.883	19	18.1	1.571	19	47.8	1.332
Q13151	Heterogeneous nuclear ribonucleoprotein A0 OS=Homo sapiens GN=HNRNPA0 PE=1 SV=1 - [ROA0_HUMAN]	0.7311	1	22	32	367	0.839	48	29.6	0.778	47	27	1.869	46	62.8	0.775	48	26.5	1.898	47	82.6	1.64	47	65.1	1.874	47	79.5	1.79	45	71.3	1.903	45	67	0.856	52	25.5	0.791	51	30.8	1.911	52	47	0.78	52	34	2.131	51	59.8	1.885
Q13601	KRR1 small subunit processome component homolog OS=Homo sapiens GN=KRR1 PE=1 SV=4 - [KRR1_HUMAN]	0.811	2	22	50	307	0.838	27	23	0.761	27	24.8	2.123	27	36.1	0.807	27	33	2.473	27	40.8	2.223	27	38	4.285	27	88.6	3.56	27	90.3	3.498	27	97.3	0.819	28	31.6	0.774	27	42.2	2.069	28	55.8	0.905	27	22.1	2.433	28	47.2	2.184
Q13895	Bystin OS=Homo sapiens GN=BYSL PE=1 SV=3 - [BYST_HUMAN]	0.8124	3	22	45	211	0.927	27	28.6	0.907	27	28.2	1.387	27	46.7	0.971	27	23.3	1.554	27	58.2	1.506	27	44.2	1.856	27	78.3	1.801	26	101.4	1.899	27	93.7	0.903	27	20.9	0.867	27	21.1	1.239	27	44.6	0.938	27	27.2	1.468	27	49.2	1.405
Q5T4S7-3	Isoform 3 of E3 ubiquitin-protein ligase UBR4 OS=Homo sapiens GN=UBR4 - [UBR4_HUMAN]	0.5284	12	22	276	743	1.176	17	23	1.048	17	11.9	0.766	16	57.2	1.08	17	7.8	0.768	15	51	0.785	15	47.4	0.885	14	32.3	0.819	13	41.4	0.721	16	34.2	1.302	18	27.8	1.212	18	20.1	0.908	17	37.2	1.11	18	20.6	0.751	17	55.7	0.759
Q7Z4V5	Hepatoma-derived growth factor-related protein 2 OS=Homo sapiens GN=HDGFRP2 PE=1 SV=1 - [HDGR2_HUMAN]	0.5946	13	22	60	251	0.728	18	25.6	0.779	18	48.6	2.558	18	77	0.675	18	36.5	3.12	18	80.7	2.746	18	68.5	3.706	18	49.2	3.525	18	67	3.732	18	73.1	0.827	21	34.9	0.813	21	33.4	2.777	21	27.9	0.733	21	53.5	3.101	21	43.1	2.886
Q8NB90	Spermatogenesis-associated protein 5 OS=Homo sapiens GN=SPATA5 PE=1 SV=3 - [SPAT5_HUMAN]	0.6697	3	22	64	217	1.038	19	9.8	1.067	19	8.3	1.268	18	36.5	1.014	19	12.8	1.582	17	25.2	1.307	19	29.4	1.588	18	26.7	1.535	17	43.2	1.449	17	39.6	1.054	19	14.6	1.006	19	19.9	1.26	17	19	1.055	18	15.3	1.317	17	27	1.214
Q8WXF1	Paraspeckle component 1 OS=Homo sapiens GN=PSPC1 PE=1 SV=1 - [PSPC1_HUMAN]	0.7648	4	22	56	357	0.856	21	37.7	0.845	21	26.7	2.405	21	61.7	0.844	21	28.8	2.361	21	45.5	2.05	21	39.8	2.14	21	39.4	2.056	21	51.8	2.133	20	53.8	0.818	23	28.4	0.75	23	20.3	2.105	23	19.2	0.802	23	33.3	2.535	23	27.9	2.071
Q92547	DNA topoisomerase 2-binding protein 1 OS=Homo sapiens GN=TOPBP1 PE=1 SV=3 - [TOPB1_HUMAN]	0.6682	7	22	95	318	0.916	10	23.6	0.911	10	20.4	1.242	10	26.3	0.954	10	35.7	1.337	11	48.5	1.332	11	32.6	1.119	10	23.9	1.153	10	28.8	1.019	10	68.2	1.087	15	24.3	1.037	15	26.5	1.51	15	23.2	1.04	15	18.4	1.584	15	45.4	1.529
Q92614	Unconventional myosin-XVIIIa OS=Homo sapiens GN=MYO18A PE=1 SV=3 - [MY18A_HUMAN]	0.6597	11	22	179	439	1.084	12	23.6	1.085	12	4.8	0.665	12	45	1.02	12	10.2	0.619	12	64.3	0.631	12	32.7	0.569	12	44.4	0.551	11	54.3	0.585	12	78.2	1.028	15	16.5	1.056	15	13.1	0.735	14	46.2	1.038	15	24.4	0.706	14	30.9	0.728
Q92769	Histone deacetylase 2 OS=Homo sapiens GN=HDAC2 PE=1 SV=2 - [HDAC2_HUMAN]	0.7541	14	22	47	474	0.875	36	30.5	0.771	36	35.4	1.718	36	60	0.837	36	33.9	1.911	36	49.5	1.677	36	45	1.678	35	57	1.386	35	58.7	1.385	34	58.1	0.876	35	29	0.807	35	20.5	1.666	35	49.9	0.751	35	30.1	2.134	35	53.9	1.553
Q92797	Symplekin OS=Homo sapiens GN=SYMPK PE=1 SV=2 - [SYMPK_HUMAN]	0.6421	9	22	96	272	0.909	21	33.1	0.815	21	37.6	1.475	21	52.6	0.829	21	24	1.817	21	56.9	1.753	20	47.1	1.57	20	61.4	1.31	19	199	1.674	18	91.9	0.865	21	19.9	0.876	22	20.2	1.172	21	36.8	0.888	21	16.4	1.592	22	45.1	1.669
Q969G3-2	Isoform 2 of SWI/SNF-related matrix-associated actin-dependent regulator of chromatin subfamily E member 1 OS=Homo sapiens GN=SMARCE1 - [SMCE1_HUMAN]	0.8843	15	22	50	303	0.803	34	29.9	0.811	34	25.4	1.998	33	39.6	0.808	34	25.5	2.127	33	46.4	1.942	33	39.8	1.946	33	60.2	1.811	33	65.4	2.069	33	52.1	0.857	32	28.6	0.861	32	17.3	2	31	38.2	0.867	30	21.9	2.104	31	45.8	2.005
Q96AY3	Peptidyl-prolyl cis-trans isomerase FKBP10 OS=Homo sapiens GN=FKBP10 PE=1 SV=1 - [FKB10_HUMAN]	0.6838	11	22	45	318	1.042	25	13.8	1.015	25	12.4	0.85	25	25.3	0.958	25	18.9	0.727	24	34	0.766	24	27.8	0.669	23	34.3	0.719	22	56.8	0.657	24	44.7	0.92	29	15.6	0.998	29	11.8	0.855	28	32.3	0.935	29	22.9	0.665	29	84	0.76
Q96DI7	U5 small nuclear ribonucleoprotein 40 kDa protein OS=Homo sapiens GN=SNRNP40 PE=1 SV=1 - [SNR40_HUMAN]	0.8599	4	22	37	277	0.885	33	19.3	0.928	33	21.8	2.001	33	61.1	0.898	34	37.8	2.048	34	63.2	1.767	34	50.1	2.001	34	49.7	2.089	32	62.7	1.885	33	52.5	0.894	37	18.9	0.797	38	28.8	1.867	39	46	0.877	39	19.9	2.127	38	53.2	1.913
Q96TA2	ATP-dependent zinc metalloprotease YME1L1 OS=Homo sapiens GN=YME1L1 PE=1 SV=2 - [YMEL1_HUMAN]	0.7477	10	22	70	255	1.081	16	19.2	1.016	16	13.7	0.848	16	47.3	1.072	16	19.1	0.763	15	37.4	0.721	16	31.5	0.581	16	76.1	0.749	13	54.9	0.602	16	96.7	1.027	14	23.1	0.977	14	23	0.733	13	55.8	1.02	14	19.8	0.594	14	35	0.635
Q99543	DnaJ homolog subfamily C member 2 OS=Homo sapiens GN=DNAJC2 PE=1 SV=4 - [DNJC2_HUMAN]	0.7214	8	22	69	248	1.005	21	9	1.106	20	14.6	0.759	20	24.3	1.054	21	13.2	0.737	19	29.8	0.738	21	19.1	0.747	19	39.6	0.77	20	29.9	0.885	19	35.8	1.064	20	18.6	1.102	20	16	0.861	19	47.4	1.082	20	19.3	0.817	18	42.6	0.907
Q99832	T-complex protein 1 subunit eta OS=Homo sapiens GN=CCT7 PE=1 SV=2 - [TCPH_HUMAN]	0.9061	10	22	71	896	1.038	58	19.1	1.159	58	13.8	0.625	54	53.8	1.079	58	18.3	0.583	47	65.1	0.634	52	56.3	0.533	47	85.8	0.625	43	103.8	0.624	45	73.7	1.056	53	23.2	1.149	53	21.6	0.612	50	53.2	1.108	53	22.5	0.578	43	64	0.632
Q99873-3	Isoform 3 of Protein arginine N-methyltransferase 1 OS=Homo sapiens GN=PRMT1 - [ANM1_HUMAN]	0.8222	17	22	32	206	0.943	33	17.1	1.061	32	9.1	0.645	32	71.5	0.974	33	15.3	0.717	31	73.5	0.629	33	70.6	0.582	31	105.4	0.706	30	90.3	0.824	30	72.4	0.844	29	18.7	0.946	29	15.3	0.76	29	62.3	0.949	29	16.9	0.773	27	71.5	0.695
Q9BPX3	Condensin complex subunit 3 OS=Homo sapiens GN=NCAPG PE=1 SV=1 - [CND3_HUMAN]	0.6365	4	22	81	254	1.004	14	9.9	0.991	14	18.4	1.04	14	32	0.949	14	12	1.037	14	50.8	1.047	14	29.2	0.738	13	50.3	0.632	14	71.6	0.848	14	56.8	1.046	16	33.2	1.069	16	12.2	0.826	15	23.1	0.966	16	19	0.871	15	38	0.93
Q9BYG3	MKI67 FHA domain-interacting nucleolar phosphoprotein OS=Homo sapiens GN=NIFK PE=1 SV=1 - [MK67I_HUMAN]	0.901	5	22	42	269	0.936	40	22.4	0.854	40	34.3	1.729	41	44.2	0.872	41	36.2	2.073	41	40.3	1.781	41	44.2	2.646	41	68.6	2.807	41	73.2	3.236	40	71.9	0.887	38	32.1	0.878	38	31.7	1.737	38	47	0.901	38	24.8	2.043	38	41.5	1.848
Q9H582	Zinc finger protein 644 OS=Homo sapiens GN=ZNF644 PE=1 SV=2 - [ZN644_HUMAN]	0.6044	10	22	99	327	0.923	16	22.7	0.867	16	41.3	1.822	16	40.1	0.916	16	30.8	2.095	16	60.7	1.853	16	50.2	2.11	16	69.4	2.055	16	70.7	2.239	16	61.7	0.879	19	28	0.806	19	21.6	2.022	19	43.9	0.811	19	22.5	2.223	19	61.7	1.988
Q9UBB4	Ataxin-10 OS=Homo sapiens GN=ATXN10 PE=1 SV=1 - [ATX10_HUMAN]	0.7242	6	22	35	189	0.989	22	14.5	1.071	22	9.8	0.656	21	38.6	1.033	22	22.3	0.662	21	47.6	0.621	22	56	0.533	20	65	0.588	20	84.8	0.525	20	60.3	1.013	24	19	1.094	24	9.8	0.696	23	22.1	0.954	24	18.4	0.701	23	39.9	0.721
Q9UBU9	Nuclear RNA export factor 1 OS=Homo sapiens GN=NXF1 PE=1 SV=1 - [NXF1_HUMAN]	0.7205	11	22	68	305	0.917	27	33	0.815	25	22.2	1.366	26	55.9	0.844	25	22.7	1.527	26	59	1.577	26	58.4	1.217	23	65.6	1.201	22	60.9	1.135	22	69.7	0.942	28	18.3	0.912	28	19.7	1.43	27	41.2	0.926	28	26.2	1.604	27	35	1.41
Q9UKD2	mRNA turnover protein 4 homolog OS=Homo sapiens GN=MRTO4 PE=1 SV=2 - [MRT4_HUMAN]	0.8494	2	22	43	315	0.85	40	38.5	0.822	40	33.5	2.042	40	31.2	0.86	40	29.1	2.45	40	44.1	1.905	40	37.4	3.129	40	57.5	3.461	40	56.4	3.361	40	47.8	0.853	42	23	0.868	43	22.8	1.942	43	46.4	0.921	43	25.9	2.152	43	55.1	1.927
Q9Y383	Putative RNA-binding protein Luc7-like 2 OS=Homo sapiens GN=LUC7L2 PE=1 SV=2 - [LC7L2_HUMAN]	0.8393	10	22	64	433	0.956	39	23.9	0.898	39	16.8	1.573	39	41.1	0.984	40	18.8	1.45	39	45.4	1.533	39	55.8	1.331	38	53.1	1.393	37	85.5	1.434	38	66.4	0.939	34	22.7	0.877	34	20	1.612	34	30.5	0.92	34	21.2	1.534	35	35.7	1.578
Q9Y4W2-2	Isoform 2 of Ribosomal biogenesis protein LAS1L OS=Homo sapiens GN=LAS1L - [LAS1L_HUMAN]	0.6444	7	22	51	186	0.975	19	26.8	0.929	19	19.5	1.232	19	26.3	0.938	18	13.7	1.406	19	42.1	1.395	18	22.3	1.752	19	42.5	1.357	17	69.4	1.536	18	37.9	0.972	22	22	0.88	22	28.6	1.31	22	29.7	0.968	22	19.2	1.482	22	45.8	1.541
A0A0D9SER5	Cyclin-dependent kinase 11B OS=Homo sapiens GN=CDK11B PE=1 SV=1 - [A0A0D9SER5_HUMAN]	0.5747	49	22	63	222	0.869	23	22.8	0.903	23	26.5	1.725	23	26.7	0.869	23	23.6	2.025	23	46.5	1.793	23	25.4	1.997	23	29.2	1.591	21	24.1	1.643	22	28.7	0.917	19	25.3	0.895	19	14.3	2.122	21	31.4	0.903	20	19.5	2.165	21	45.7	1.884
A8K894	cDNA FLJ77927 OS=Homo sapiens PE=2 SV=1 - [A8K894_HUMAN]	0.8194	14	22	47	193	0.959	14	25	0.929	14	18.7	1.492	14	31	0.955	14	23	1.782	14	37.8	1.715	14	30.8	1.771	14	49.9	1.842	14	77.5	1.556	14	67.1	0.998	15	33.4	0.932	15	16.8	1.626	15	34.5	1.065	15	19.3	1.523	15	56.1	1.376
B4DIS6	cDNA FLJ56443, highly similar to Putative ATP-dependent RNA helicase DHX33 (EC 3.6.1.-) OS=Homo sapiens PE=2 SV=1 - [B4DIS6_HUMAN]	0.6736	7	22	65	212	0.925	19	37.8	0.918	19	30.2	1.61	19	39.8	1.099	19	18.6	2.111	19	52.9	1.825	18	57.6	3.276	19	72.1	3.303	18	48.6	2.839	18	48.3	0.969	17	27.7	0.88	17	26.6	1.636	17	64.9	0.889	17	13.8	2.355	17	63.9	2.028
A8K818	cDNA FLJ75784, highly similar to Homo sapiens CD3E antigen, epsilon polypeptide associated protein (CD3EAP), mRNA OS=Homo sapiens PE=2 SV=1 - [A8K818_HUMAN]	0.7471	2	22	33	366	0.844	38	21.8	0.848	37	30.4	1.984	39	50.4	0.885	39	33.5	2.123	39	53.4	1.744	38	53.9	3.154	38	76.1	2.821	39	67	3.493	38	68.1	0.876	44	29.2	0.777	43	25.8	1.831	44	53.3	0.856	44	31.9	2.028	44	55.7	1.842
Q7Z3B4-3	Isoform 3 of Nucleoporin p54 OS=Homo sapiens GN=NUP54 - [NUP54_HUMAN]	0.756	7	21	49	276	0.84	26	42.9	0.782	26	38.1	1.993	26	79.8	0.814	26	39.5	2.257	26	86.1	2.23	26	69.6	1.733	26	74.8	1.486	26	98.9	1.544	26	55	0.785	26	34.4	0.716	26	46.1	2.49	26	57.7	0.732	26	48.5	3.06	25	89.1	2.633
G3V180	Dipeptidyl peptidase 3 OS=Homo sapiens GN=DPP3 PE=1 SV=1 - [G3V180_HUMAN]	0.8018	14	21	56	218	1.03	20	13.1	1.085	20	12.3	0.673	19	45.1	1.067	20	11.3	0.593	19	80.9	0.619	19	42.5	0.612	19	65	0.604	19	51.5	0.656	19	101.1	1.141	18	20.5	1.082	18	12.9	0.579	17	48.6	1.092	18	13.8	0.512	17	45.6	0.581
G5EA30	CUG triplet repeat, RNA binding protein 1, isoform CRA_c OS=Homo sapiens GN=CELF1 PE=1 SV=1 - [G5EA30_HUMAN]	0.5292	35	21	40	315	0.812	33	18.8	0.774	33	27.6	2.271	33	47.4	0.784	32	19.6	2.719	33	63.1	2.105	33	41.2	1.966	32	52.1	1.889	32	68.9	1.779	32	42	0.856	36	23.1	0.739	36	29.1	2.275	35	35	0.794	36	27.8	2.421	36	37.1	2.199
O00116	Alkyldihydroxyacetonephosphate synthase, peroxisomal OS=Homo sapiens GN=AGPS PE=1 SV=1 - [ADAS_HUMAN]	0.7477	8	21	46	191	1.048	22	15.7	0.941	22	14.4	0.839	22	14.7	1.016	22	16.7	0.813	22	37.7	0.786	22	22.5	0.813	20	28.3	0.778	21	47.9	0.83	20	31.3	1.072	17	17.1	0.921	17	25.5	0.913	17	45.5	1.02	17	14.4	0.709	17	36	0.756
O00151	PDZ and LIM domain protein 1 OS=Homo sapiens GN=PDLIM1 PE=1 SV=4 - [PDLI1_HUMAN]	0.9605	1	21	35	410	1.106	47	17.8	1.168	47	17.1	0.661	46	54	1.106	47	15.7	0.564	47	48.6	0.609	46	44.1	0.611	41	50	0.746	42	50.5	0.621	41	61.6	1.095	51	19.8	1.09	51	17.7	0.657	51	47.8	1.106	51	17.6	0.616	44	72.3	0.64
O00411	DNA-directed RNA polymerase, mitochondrial OS=Homo sapiens GN=POLRMT PE=1 SV=2 - [RPOM_HUMAN]	0.5902	7	21	90	294	1.072	15	18.4	1.05	15	15.6	1.139	15	108.9	1.086	15	26.2	1.094	14	57	0.95	14	89.5	0.846	12	124.7	1.004	12	116.9	1.087	13	176.7	1.116	13	19.9	0.991	13	17.5	1.18	13	67.8	1.138	13	19	0.769	13	130.5	0.973
O95478	Ribosome biogenesis protein NSA2 homolog OS=Homo sapiens GN=NSA2 PE=1 SV=1 - [NSA2_HUMAN]	0.8038	3	21	34	218	0.834	31	34.3	0.807	30	29.2	2.057	31	35.3	0.786	31	40.4	2.491	31	34.5	2.251	31	39	3.186	31	78.6	3.131	30	96.2	3.041	31	58.6	0.724	25	37.8	0.761	24	28.4	2.248	26	54.1	0.769	24	37.2	2.82	26	54	2.254
P08559-4	Isoform 4 of Pyruvate dehydrogenase E1 component subunit alpha, somatic form, mitochondrial OS=Homo sapiens GN=PDHA1 - [ODPA_HUMAN]	0.7967	18	21	50	237	1.027	25	24.1	1.039	25	18.6	0.838	25	49.3	1.043	25	22	0.777	25	81.4	0.803	25	61.9	0.885	24	125.9	0.719	24	81	0.77	25	99.2	0.994	22	17.8	0.998	22	10.2	0.864	22	77.6	1.008	22	10.3	0.747	22	106.3	0.687
P12004	Proliferating cell nuclear antigen OS=Homo sapiens GN=PCNA PE=1 SV=1 - [PCNA_HUMAN]	0.8621	7	21	29	485	0.96	62	15.4	1.014	62	11.5	0.981	62	50	0.999	62	17.3	0.877	62	51	0.934	62	44.7	0.772	59	67.8	0.789	57	68.2	0.709	56	81.8	1.008	61	16.9	1.034	61	15.3	0.978	61	36.9	1.001	61	18.8	0.976	61	54	0.964
P18669	Phosphoglycerate mutase 1 OS=Homo sapiens GN=PGAM1 PE=1 SV=2 - [PGAM1_HUMAN]	0.9606	13	21	32	514	1.055	91	14.1	1.121	92	13.8	0.575	85	58.4	1.045	91	15.1	0.461	82	81.9	0.606	84	58.3	0.544	78	101.7	0.527	76	99.4	0.545	74	91.9	1.126	76	18.1	1.148	75	13.3	0.491	70	62.9	1.116	76	18.1	0.481	66	75.1	0.508
P18754-2	Isoform 2 of Regulator of chromosome condensation OS=Homo sapiens GN=RCC1 - [RCC1_HUMAN]	0.8164	9	21	38	493	0.945	59	21.7	0.947	59	20.4	1.695	59	52.2	0.907	59	26.1	2.112	59	48.5	1.621	58	41.7	1.525	59	66.1	1.555	57	68	1.662	59	62.3	0.948	68	25.6	0.931	68	22.3	1.541	68	45.1	0.969	68	19.8	1.721	68	67	1.44
P23381	Tryptophan--tRNA ligase, cytoplasmic OS=Homo sapiens GN=WARS PE=1 SV=2 - [SYWC_HUMAN]	0.8238	29	21	44	213	1.04	27	13.6	1.12	27	20.6	0.591	27	70.4	1.089	27	17.2	0.507	23	127.9	0.54	23	33.9	0.482	25	85.8	0.505	21	127.2	0.548	23	65.7	1.003	26	20.7	1.122	26	20.6	0.688	22	51.7	1.011	26	18.2	0.567	22	79.9	0.655
P26368-2	Isoform 2 of Splicing factor U2AF 65 kDa subunit OS=Homo sapiens GN=U2AF2 - [U2AF2_HUMAN]	0.69	5	21	41	315	0.983	42	36.4	0.881	42	29.3	2.253	42	71.7	0.905	42	20.8	2.429	41	69.6	2.23	42	65.9	1.92	42	60.1	1.886	41	62.4	1.938	42	39.1	0.964	46	26.1	0.831	44	28.8	2.205	46	64.5	0.911	45	24.1	2.51	46	58.5	2.406
P27348	14-3-3 protein theta OS=Homo sapiens GN=YWHAQ PE=1 SV=1 - [1433T_HUMAN]	0.9878	8	21	37	540	0.914	46	27.7	1.141	46	15.4	0.551	46	70.1	0.949	46	21	0.475	46	90.7	0.532	46	82.8	0.521	45	126.8	0.508	44	122.2	0.525	42	112.9	0.977	51	22.4	1.097	51	13	0.635	51	58.2	0.995	51	14.7	0.632	50	80	0.653
P30520	Adenylosuccinate synthetase isozyme 2 OS=Homo sapiens GN=ADSS PE=1 SV=3 - [PURA2_HUMAN]	0.5526	7	21	33	203	0.998	24	20.9	1.068	23	13.6	0.65	22	70.1	1.031	24	22.9	0.635	22	95.1	0.571	24	50.3	0.721	22	150.6	0.549	21	75.7	0.708	21	94.9	1.096	25	20.1	1.069	26	10.5	0.564	23	55	0.994	25	19.2	0.617	23	54.2	0.599
P38606	V-type proton ATPase catalytic subunit A OS=Homo sapiens GN=ATP6V1A PE=1 SV=2 - [VATA_HUMAN]	0.752	5	21	41	254	1.03	28	18	1.048	28	18.4	0.681	28	31.6	1.06	28	21.4	0.658	24	31.9	0.71	24	34.3	0.791	24	54.2	0.683	24	45.1	0.809	23	52.1	0.966	28	22.5	1.07	28	18.5	0.762	25	40.3	0.949	28	26	0.762	25	42.6	0.743
P45880-1	Isoform 1 of Voltage-dependent anion-selective channel protein 2 OS=Homo sapiens GN=VDAC2 - [VDAC2_HUMAN]	0.9709	9	21	34	375	0.989	52	16.4	1.001	52	10.9	0.612	51	47.6	0.982	52	16.2	0.441	48	70.6	0.542	50	47.2	0.381	44	123.2	0.394	44	133.7	0.353	46	141.4	1.01	51	17.2	1.002	51	13	0.663	50	60.2	1.002	51	15.4	0.463	47	59	0.496
P49419-2	Isoform 2 of Alpha-aminoadipic semialdehyde dehydrogenase OS=Homo sapiens GN=ALDH7A1 - [AL7A1_HUMAN]	0.7339	20	21	46	191	1.032	26	11.1	1.051	26	11.6	0.578	25	35.9	1.059	26	10.7	0.577	24	42.8	0.631	25	25.3	0.499	24	51.1	0.557	22	63.2	0.502	23	56.2	1.031	20	11.3	1.023	20	11.2	0.591	19	21.9	1.044	20	6.8	0.523	19	41.8	0.591
P51116	Fragile X mental retardation syndrome-related protein 2 OS=Homo sapiens GN=FXR2 PE=1 SV=2 - [FXR2_HUMAN]	0.8499	7	21	62	222	1.045	16	14.9	1.051	16	19.7	0.945	16	70.4	1.094	16	11.7	0.975	16	138.5	0.941	15	104.7	1.126	15	186.7	1.253	15	140.5	1.357	14	279.7	1.022	17	11.4	1.141	17	8.1	0.704	17	51.6	1.079	17	14.5	0.828	17	70.5	0.788
P55081	Microfibrillar-associated protein 1 OS=Homo sapiens GN=MFAP1 PE=1 SV=2 - [MFAP1_HUMAN]	0.7768	1	21	54	272	0.767	24	26.4	0.64	23	50.3	2.589	24	68.8	0.719	23	25.9	3.092	24	80.3	2.295	24	61.5	2.72	24	70.7	2.602	24	102.4	2.77	24	96.3	0.709	23	32	0.733	22	22.4	2.487	23	92.1	0.771	23	36.4	2.421	23	67	2.536
P62249	40S ribosomal protein S16 OS=Homo sapiens GN=RPS16 PE=1 SV=2 - [RS16_HUMAN]	0.9589	8	21	29	333	1.011	54	32.7	1.004	54	17.1	0.918	53	73.6	0.969	54	28.8	1.095	50	87.2	0.919	52	108.6	1.033	50	168.5	1.128	50	183.3	1.092	46	199.6	0.933	55	35.8	0.941	55	13.3	0.942	53	71.7	0.911	55	26.4	0.954	51	79.3	0.87
P62258	14-3-3 protein epsilon OS=Homo sapiens GN=YWHAE PE=1 SV=1 - [1433E_HUMAN]	0.9451	12	21	39	592	1.155	75	24.8	1.196	74	18.2	0.844	74	45.5	1.097	73	19.1	0.732	74	69.7	0.82	74	47.4	0.687	67	84.6	0.622	67	97.8	0.587	69	97.9	1.132	72	23.8	1.177	73	16.1	0.834	70	58.9	1.088	72	17.3	0.752	70	57.4	0.765
P62750	60S ribosomal protein L23a OS=Homo sapiens GN=RPL23A PE=1 SV=1 - [RL23A_HUMAN]	0.7564	8	21	26	390	1.074	62	24.1	1.117	63	12.5	0.881	62	55.9	1.031	63	25.8	0.847	60	64.2	0.893	63	48.6	0.79	60	78.1	0.86	58	78.8	1.011	57	92.8	1.086	66	24	1.132	66	15.8	0.899	66	41.3	1.05	66	20.6	0.868	65	49.9	0.932
P62805	Histone H4 OS=Homo sapiens GN=HIST1H4A PE=1 SV=2 - [H4_HUMAN]	0.8641	4	21	22	458	0.82	76	28.8	0.745	72	43	1.425	76	32.5	0.806	76	31.1	3.403	76	68.7	1.453	76	50.6	2.267	76	73.3	3.005	76	57.4	3.47	76	62.1	0.772	58	33.5	0.722	53	27.3	1.348	59	42.2	0.724	56	22	3.326	59	67.1	1.343
P80723	Brain acid soluble protein 1 OS=Homo sapiens GN=BASP1 PE=1 SV=2 - [BASP1_HUMAN]	0.9339	3	21	24	288	0.748	39	22.3	1.133	39	12.7	0.455	38	88.7	0.863	39	20	0.407	36	83.8	0.397	39	98.2	0.364	33	172.9	0.5	32	104.5	0.443	34	103.4	0.751	46	28.8	1.088	46	11.1	0.341	46	110	0.815	46	19	0.285	43	172.6	0.339
P83731	60S ribosomal protein L24 OS=Homo sapiens GN=RPL24 PE=1 SV=1 - [RL24_HUMAN]	0.8599	3	21	36	342	1.126	54	20.5	1.152	54	12.7	0.741	52	48.6	1.049	54	18.3	0.733	52	61.3	0.715	53	55.4	0.637	50	77.3	0.619	51	86.4	0.577	51	102.7	1.079	53	19	1.169	53	9.9	0.706	51	48.2	1.068	53	14.9	0.691	52	55.5	0.705
Q02809	Procollagen-lysine,2-oxoglutarate 5-dioxygenase 1 OS=Homo sapiens GN=PLOD1 PE=1 SV=2 - [PLOD1_HUMAN]	0.6479	7	21	53	266	0.999	25	16.8	0.956	25	12.7	0.88	24	29.2	0.996	24	19.4	0.681	22	69.5	0.696	24	59	0.662	23	96.1	0.727	21	103.8	0.633	22	90.3	1.09	26	21.3	0.992	26	24.8	0.812	25	88.7	1.034	26	16.7	0.703	24	86.3	0.803
Q02818	Nucleobindin-1 OS=Homo sapiens GN=NUCB1 PE=1 SV=4 - [NUCB1_HUMAN]	0.7115	12	21	49	193	0.97	18	13.6	0.988	18	19.3	0.638	18	51.3	0.956	18	22.7	0.565	16	40.6	0.594	17	38.4	0.585	15	99.2	0.931	15	217.6	0.698	16	97.6	0.992	20	17.5	0.984	21	8.6	0.848	20	59.8	0.952	21	9.7	0.775	18	83.3	0.787
Q06830	Peroxiredoxin-1 OS=Homo sapiens GN=PRDX1 PE=1 SV=1 - [PRDX1_HUMAN]	0.8643	4	21	32	679	1.01	95	28.5	1.143	95	13.7	0.493	94	70.4	1.041	95	19.4	0.423	90	134.9	0.476	92	73.3	0.439	88	92.7	0.427	88	96.1	0.44	85	113.8	0.983	89	26.5	1.15	89	13.6	0.557	89	63	1.029	89	20.6	0.441	85	96.3	0.53
Q15007	Pre-mRNA-splicing regulator WTAP OS=Homo sapiens GN=WTAP PE=1 SV=2 - [FL2D_HUMAN]	0.8207	6	21	53	334	0.827	22	27.6	0.828	23	14.5	2.281	23	34.8	0.81	24	17.6	2.382	24	46.8	2.387	24	47.9	2.389	24	39.6	2.529	23	36.8	2.398	23	42.8	0.85	30	22.4	0.818	30	37.8	1.994	31	39.9	0.775	30	32.5	2.642	31	62.9	2.302
Q15813	Tubulin-specific chaperone E OS=Homo sapiens GN=TBCE PE=1 SV=1 - [TBCE_HUMAN]	0.9108	3	21	53	196	0.911	16	27.2	1.056	17	13.8	0.674	16	54.2	0.958	16	25.2	0.587	14	62.7	0.619	14	81.6	0.5	14	96.5	0.519	14	95.9	0.572	14	67.4	1.026	20	33.9	0.981	20	19.4	0.52	17	58.3	0.95	20	24.6	0.652	20	77.1	0.692
Q15942	Zyxin OS=Homo sapiens GN=ZYX PE=1 SV=1 - [ZYX_HUMAN]	0.6154	12	21	29	289	1.061	28	14.5	1.114	28	11.4	0.989	27	95.7	1.075	28	15.1	0.926	27	87.4	0.838	26	75.1	0.747	26	135.4	0.687	27	112.5	1.014	26	90.4	1.034	29	15	1.072	30	16.1	0.884	29	62.1	1.017	30	19.1	0.797	27	96	0.899
Q68D10-2	Isoform 2 of Protein SPT2 homolog OS=Homo sapiens GN=SPTY2D1 - [SPT2_HUMAN]	0.7563	4	21	74	261	0.858	19	23.4	0.898	19	25.9	2.38	19	44.5	0.879	19	41.5	3.218	19	39.8	2.044	19	40	3.528	19	72.2	3.968	19	68.2	4.562	19	96	0.986	14	22.8	0.972	14	20	2.463	14	71.9	0.947	14	37.9	2.657	14	57.8	2.224
Q69YH5	Cell division cycle-associated protein 2 OS=Homo sapiens GN=CDCA2 PE=1 SV=2 - [CDCA2_HUMAN]	0.7048	5	21	87	300	0.772	16	25.8	0.841	16	31.8	2.793	16	52.8	0.756	16	41.7	3.264	16	71.3	2.892	16	59.4	3.165	16	83.2	2.847	16	61.6	3.025	16	86.2	0.939	15	15.3	0.893	15	15.4	2.319	15	39.4	0.846	15	44.3	2.554	15	40.3	2.554
Q6UX04	Peptidyl-prolyl cis-trans isomerase CWC27 homolog OS=Homo sapiens GN=CWC27 PE=1 SV=1 - [CWC27_HUMAN]	0.8581	3	21	48	218	0.984	25	30.3	0.944	25	21.8	2.158	25	41.2	0.986	25	24.2	1.998	25	42.6	2.123	25	49.4	1.96	25	39.2	1.937	24	56.5	1.897	24	74.1	1.04	29	14.5	1.034	29	19.9	1.903	29	42.6	1.106	29	29.1	2.366	29	67	2.241
Q8NBJ5	Procollagen galactosyltransferase 1 OS=Homo sapiens GN=COLGALT1 PE=1 SV=1 - [GT251_HUMAN]	0.6045	12	21	54	187	0.98	17	17.3	1.009	17	14.1	0.904	17	63.2	1.021	17	15.4	0.755	16	115.5	0.763	17	81	0.66	15	113.7	0.701	14	64.9	0.773	15	79.5	1.007	15	10.1	0.932	15	13.9	0.772	15	26.7	0.99	15	18.1	0.554	15	83.6	0.74
Q8WWY3	U4/U6 small nuclear ribonucleoprotein Prp31 OS=Homo sapiens GN=PRPF31 PE=1 SV=2 - [PRP31_HUMAN]	0.6934	10	21	44	258	0.852	29	25.3	0.844	29	24.9	2.158	29	40.6	0.922	29	27.9	2.257	29	32.9	1.994	29	28.9	2.097	28	38.1	1.824	28	44	1.723	29	39.6	0.918	30	19.3	0.911	29	17.1	1.934	30	44.8	0.939	30	23.7	1.995	30	56.7	1.823
Q8WYA6	Beta-catenin-like protein 1 OS=Homo sapiens GN=CTNNBL1 PE=1 SV=1 - [CTBL1_HUMAN]	0.6394	6	21	59	261	0.881	30	24.9	0.848	28	18	2.282	32	67.6	0.961	29	22.4	2.16	32	48.3	2.179	32	47.4	2.776	32	66.6	1.943	32	58.3	1.941	31	62.7	0.851	27	20.6	0.744	27	30.5	2.421	28	63.8	0.906	28	21.8	2.825	28	53.7	2.607
Q96JM3	Chromosome alignment-maintaining phosphoprotein 1 OS=Homo sapiens GN=CHAMP1 PE=1 SV=2 - [CHAP1_HUMAN]	0.5874	2	21	51	206	0.767	15	25.7	0.734	15	28.8	1.683	15	22.8	0.755	15	37.2	2.185	15	46.2	1.749	15	26.5	1.877	15	42.1	1.539	15	33	2.073	15	43.2	0.847	19	31.3	0.832	19	37.3	2.215	19	63.4	0.813	19	24.5	2.395	19	55.3	1.957
Q99700-4	Isoform 4 of Ataxin-2 OS=Homo sapiens GN=ATXN2 - [ATX2_HUMAN]	0.5245	15	21	77	391	1.024	23	19.6	1.077	23	12.5	0.891	23	52.5	1.097	23	20.2	0.947	23	60.3	0.78	23	43.9	0.754	23	79.3	0.812	22	82	0.804	22	85.9	1.039	21	14.5	1.09	21	11.5	0.884	21	58.5	1.09	21	15.9	0.886	20	63.5	0.871
Q9BY44	Eukaryotic translation initiation factor 2A OS=Homo sapiens GN=EIF2A PE=1 SV=3 - [EIF2A_HUMAN]	0.8923	10	21	49	222	1.028	29	21.9	1.057	29	12.1	0.838	29	36.1	1.003	29	17	0.763	29	71.3	0.893	29	38.3	0.787	28	75.1	0.93	28	56.9	0.959	28	85.2	1.017	27	18.4	1.069	27	14.6	0.951	27	51.6	1.029	27	15.8	0.976	27	53.8	0.862
Q9BYW2	Histone-lysine N-methyltransferase SETD2 OS=Homo sapiens GN=SETD2 PE=1 SV=3 - [SETD2_HUMAN]	0.5936	7	21	176	466	0.857	15	16.4	0.826	15	10.4	2.185	15	31.8	0.82	15	22.2	2.528	15	26.3	2.177	15	41.6	1.943	15	70.3	2.181	15	75.3	1.882	15	81.2	0.86	17	14.2	0.832	17	19.2	1.885	17	36.3	0.837	17	19.1	2.114	17	31.5	1.96
Q9C0J8	pre-mRNA 3' end processing protein WDR33 OS=Homo sapiens GN=WDR33 PE=1 SV=2 - [WDR33_HUMAN]	0.5524	5	21	82	312	0.868	19	22.6	0.827	19	22.1	1.88	19	54.7	0.89	19	22	2.178	19	68.1	2.095	19	51.4	1.748	19	74	1.875	19	61.3	1.54	19	67.8	0.894	21	34.3	0.82	21	34.5	2.106	21	43.1	0.847	21	37.5	2.246	21	52.8	1.955
Q9H4A3-5	Isoform 4 of Serine/threonine-protein kinase WNK1 OS=Homo sapiens GN=WNK1 - [WNK1_HUMAN]	0.3891	14	21	104	303	0.999	15	22.3	1.084	14	11.3	0.807	14	39.4	0.96	14	22.8	0.788	15	40.3	0.783	15	38.2	0.721	14	49.1	0.7	14	64.9	0.739	14	77.6	1.087	18	12.1	1.054	18	13.2	0.674	16	49.3	0.922	18	15.8	0.755	16	50.5	0.785
Q9HB71	Calcyclin-binding protein OS=Homo sapiens GN=CACYBP PE=1 SV=2 - [CYBP_HUMAN]	0.864	6	21	33	247	1.011	40	13.8	1.104	40	10.4	0.764	40	40.5	1.044	40	17.7	0.754	40	47.5	0.783	40	45.5	0.671	39	65.5	0.687	38	61.9	0.594	40	57.8	0.985	37	17.2	1.091	37	9.3	0.724	37	33.4	1.025	37	13.7	0.742	37	43.5	0.716
Q9NQR4	Omega-amidase NIT2 OS=Homo sapiens GN=NIT2 PE=1 SV=1 - [NIT2_HUMAN]	0.9493	8	21	34	164	1.115	26	10.7	1.085	26	18.8	0.637	23	34.6	1.078	26	21.8	0.479	24	73.3	0.586	26	69.5	0.517	22	98.2	0.565	23	76.9	0.649	22	107.2	1.038	19	18.2	1.14	19	9.2	0.683	17	52.9	1.067	19	20.2	0.435	18	63.7	0.556
Q9NR45	Sialic acid synthase OS=Homo sapiens GN=NANS PE=1 SV=2 - [SIAS_HUMAN]	0.9304	5	21	37	222	1.074	23	21.1	1.141	23	13.9	0.72	23	49.7	1.09	23	17.7	0.731	23	96.9	0.732	23	67.4	0.867	21	137.5	0.853	22	138.1	0.746	23	291.2	1.108	28	20.4	1.106	29	12.7	0.715	29	45	1.13	29	17.3	0.576	29	77.9	0.664
Q9NXH9	tRNA (guanine(26)-N(2))-dimethyltransferase OS=Homo sapiens GN=TRMT1 PE=1 SV=1 - [TRM1_HUMAN]	0.7299	13	21	55	202	1.072	24	20.5	1.088	24	16.2	0.923	23	70.6	1.02	24	19.1	0.867	23	70.7	0.85	24	77.7	0.872	22	67.5	0.761	23	96.7	0.882	23	103.9	1.086	20	12.1	1.07	20	11.5	0.914	19	44.7	1.046	20	9.2	0.826	17	100.5	0.862
Q9Y5K5-4	Isoform 4 of Ubiquitin carboxyl-terminal hydrolase isozyme L5 OS=Homo sapiens GN=UCHL5 - [UCHL5_HUMAN]	0.9325	56	21	41	246	1.086	28	16.5	1.108	28	16.1	0.716	28	73.7	0.998	28	19	0.779	28	57.6	0.79	28	50.9	0.845	26	91.3	0.736	25	68.7	0.753	27	93	1.014	25	27.2	1.097	25	21.1	0.765	24	74.3	1.018	25	25.6	0.755	23	79	0.8
B4DEB0	cDNA FLJ56054, highly similar to 26S proteasome non-ATPase regulatory subunit 3 OS=Homo sapiens PE=2 SV=1 - [B4DEB0_HUMAN]	0.9155	11	21	70	315	1.019	32	24.1	1.066	32	18.7	0.718	31	53.7	1.067	32	19.5	0.643	30	84.4	0.809	29	54	0.699	26	87.8	0.816	29	64.1	0.68	27	89.3	1.074	32	21.5	1.051	32	20.3	0.806	30	77	1.03	31	21	0.809	30	74.5	0.91
A8K1D3	Nibrin OS=Homo sapiens PE=2 SV=1 - [A8K1D3_HUMAN]	0.7918	14	21	72	266	0.811	13	31.7	0.878	13	26.5	1.813	13	37.7	0.732	13	34.7	2.075	13	23.3	1.904	13	19	1.947	13	43.3	1.594	13	59.4	1.638	13	40.2	0.864	19	30.9	0.797	19	29.9	1.706	19	33.9	0.873	19	41.3	1.885	19	45.1	1.85
Q6FGM6	PPID protein OS=Homo sapiens GN=PPID PE=2 SV=1 - [Q6FGM6_HUMAN]	0.873	5	21	43	183	1.095	18	13.2	1.109	18	10.5	0.66	18	49.2	1.061	18	12.1	0.559	18	70.1	0.575	18	54.1	0.54	17	71.5	0.541	17	118.5	0.574	17	132	0.979	15	20	1.057	15	23	0.774	15	48.1	0.985	15	15.1	0.701	14	69.5	0.709
M0QZR4	Rho guanine nucleotide exchange factor 1 OS=Homo sapiens GN=ARHGEF1 PE=1 SV=1 - [M0QZR4_HUMAN]	0.6167	12	21	70	253	1.057	13	15.5	1.027	13	13	1.069	13	62.7	1.057	14	8.8	1.036	12	49.2	0.903	13	47.7	1.223	13	77.1	1.336	11	76.3	1.317	13	98.2	1.038	13	24.7	1.035	13	16.4	0.643	13	47.7	1.036	13	17.9	0.818	13	61.1	0.767
P37802-2	Isoform 2 of Transgelin-2 OS=Homo sapiens GN=TAGLN2 - [TAGL2_HUMAN]	0.9864	6	21	37	611	1.058	73	26.3	1.212	72	15.3	0.589	68	65.3	1.117	73	29.5	0.51	64	85	0.54	69	68.7	0.578	61	89.2	0.611	60	113.3	0.606	62	108.7	1.098	69	24.9	1.196	69	12.5	0.618	67	86.9	1.096	69	23.8	0.631	64	119.8	0.661
A0A024R1X8	Junction plakoglobin, isoform CRA_a OS=Homo sapiens GN=JUP PE=4 SV=1 - [A0A024R1X8_HUMAN]	0.7879	10	21	56	262	1.101	21	21.5	1.021	21	14.2	0.694	21	61.8	1.082	21	21.8	0.658	18	73.6	0.816	19	55.1	0.678	18	99.3	0.822	18	62.8	0.773	18	67.9	1.007	22	20.6	0.965	22	7.9	0.534	22	54	0.946	22	18.4	0.505	21	81.1	0.512
A0A0D9SF53	ATP-dependent RNA helicase DDX3X OS=Homo sapiens GN=DDX3X PE=1 SV=1 - [A0A0D9SF53_HUMAN]	0.8663	20	21	97	853	0.93	31	23.8	1.007	31	16	1.3	31	35.8	0.956	31	21	1.349	31	50.4	1.144	30	56.2	0.854	30	69.6	0.842	30	63.2	0.737	30	64.4	0.939	33	26.5	0.972	33	18.2	1.124	33	54.1	0.931	34	29.5	1.026	31	77.5	1.092
Q16643-3	Isoform 3 of Drebrin OS=Homo sapiens GN=DBN1 - [DREB_HUMAN]	0.6317	9	20	45	205	1.029	22	14.4	1.121	22	18.6	0.832	22	57.8	1.094	22	13.4	0.789	22	48	0.79	22	47.4	0.832	22	62.9	0.769	22	92.4	0.91	22	53.1	1.026	23	22.5	1.101	23	12.1	0.907	23	61.9	1.094	23	19.6	0.662	23	87.9	0.707
O14744	Protein arginine N-methyltransferase 5 OS=Homo sapiens GN=PRMT5 PE=1 SV=4 - [ANM5_HUMAN]	0.6217	20	20	43	174	1.013	20	25.8	1.048	20	10	0.639	18	78.9	1.104	20	26.7	0.681	19	67.3	0.726	18	44.9	0.844	18	100.2	0.809	17	71.4	0.755	19	75.2	0.953	22	23.3	1.024	22	13	0.531	21	81.3	1.003	22	17.3	0.68	20	74.4	0.597
O75934	Pre-mRNA-splicing factor SPF27 OS=Homo sapiens GN=BCAS2 PE=1 SV=1 - [SPF27_HUMAN]	0.8622	2	20	30	341	0.917	41	16.7	0.906	41	13.7	1.599	40	30.8	0.92	41	18.3	1.755	41	24.8	1.538	41	25.7	1.752	41	31.6	1.578	38	39	1.653	41	50.3	0.97	49	27.5	0.943	48	22.5	1.665	48	46.7	0.93	49	26.5	1.928	49	59.5	1.587
O95202	LETM1 and EF-hand domain-containing protein 1, mitochondrial OS=Homo sapiens GN=LETM1 PE=1 SV=1 - [LETM1_HUMAN]	0.5697	4	20	48	197	1.077	23	20.3	0.92	23	15.1	0.716	23	55.9	1.024	23	15.7	0.506	23	58.2	0.652	23	61.2	0.455	21	106.3	0.432	21	94.6	0.617	20	98.6	0.965	21	16.4	0.936	21	10.1	0.579	21	51.1	0.948	21	16	0.6	20	53.4	0.562
O95433	Activator of 90 kDa heat shock protein ATPase homolog 1 OS=Homo sapiens GN=AHSA1 PE=1 SV=1 - [AHSA1_HUMAN]	0.9704	7	20	39	159	1.017	14	20.1	1.178	14	12.1	0.562	14	42.2	1.103	14	19	0.597	13	57.5	0.617	13	49.5	0.592	13	83.7	0.629	13	82.4	0.545	13	141.2	1.017	20	16.1	1.143	20	14.8	0.791	20	42	1.092	20	10.9	0.765	20	39.2	0.901
P00390	Glutathione reductase, mitochondrial OS=Homo sapiens GN=GSR PE=1 SV=2 - [GSHR_HUMAN]	0.7299	8	20	45	268	1.103	32	16.9	1.134	32	14.9	0.838	30	54.9	1.102	32	15.3	0.832	31	61	0.82	30	68.8	0.721	30	76.3	0.848	30	68.6	1.078	31	65	1.089	30	15.1	1.197	30	17.7	0.685	29	47.5	1.164	30	16.1	0.648	28	66.8	0.689
P15121	Aldose reductase OS=Homo sapiens GN=AKR1B1 PE=1 SV=3 - [ALDR_HUMAN]	0.8386	8	20	28	248	1.05	30	16.5	1.087	30	13.4	0.573	30	64.3	1.034	30	16.3	0.525	29	50.5	0.558	30	49.2	0.537	28	86.3	0.54	28	82.3	0.591	28	65.5	0.987	28	11.8	1.087	28	11.7	0.556	28	48.3	0.987	28	12.3	0.62	27	51.4	0.635
P25685	DnaJ homolog subfamily B member 1 OS=Homo sapiens GN=DNAJB1 PE=1 SV=4 - [DNJB1_HUMAN]	0.9029	11	20	40	214	1.088	24	21.2	1.073	25	15.8	0.864	24	30.6	1.117	25	27.3	0.886	21	45.9	0.814	23	54.1	0.899	21	112.7	0.674	21	93.3	0.843	21	135.7	1.192	25	26.8	1.163	25	19.8	0.927	24	57.7	1.168	25	15.2	0.87	21	67.7	0.871
P38117	Electron transfer flavoprotein subunit beta OS=Homo sapiens GN=ETFB PE=1 SV=3 - [ETFB_HUMAN]	0.7373	3	20	27	176	1.011	25	14.8	1.034	25	10.3	0.735	25	34.3	0.977	25	15.5	0.563	25	68.9	0.644	25	65.5	0.738	24	80.8	0.729	25	83.3	0.614	25	99.3	1	28	20.4	1.009	28	8.3	0.734	28	46.5	0.99	28	13.1	0.522	28	77.8	0.612
P46779	60S ribosomal protein L28 OS=Homo sapiens GN=RPL28 PE=1 SV=3 - [RL28_HUMAN]	0.8978	10	20	29	323	1.069	42	31.8	1.121	42	15.9	0.734	39	72.7	1.05	42	30.7	0.782	38	107.6	0.835	39	95.5	0.861	39	103.7	0.731	38	89.8	0.874	38	118.5	1.074	49	31.3	1.158	49	13	0.741	48	84.4	1.053	49	29.6	0.813	48	103.7	0.824
P51858	Hepatoma-derived growth factor OS=Homo sapiens GN=HDGF PE=1 SV=1 - [HDGF_HUMAN]	1	9	20	32	333	0.942	45	28.6	1.169	45	17	0.627	46	50	0.993	47	18.2	0.512	43	48.4	0.619	46	47.6	0.532	40	83	0.549	38	91.2	0.447	41	86.4	1.014	37	25.6	1.158	37	9.9	0.571	39	55.1	1.006	39	16.1	0.435	36	76.3	0.563
P52788	Spermine synthase OS=Homo sapiens GN=SMS PE=1 SV=2 - [SPSY_HUMAN]	0.8087	4	20	33	251	1.129	30	18.1	1.108	30	17.8	0.654	28	42.9	1.098	30	15.1	0.579	27	82	0.522	29	54.5	0.449	24	87.4	0.563	26	54.8	0.46	24	86.5	1.142	30	25.7	1.211	30	23.1	0.886	27	29.4	1.169	30	25.5	0.784	23	47.3	0.815
P57740	Nuclear pore complex protein Nup107 OS=Homo sapiens GN=NUP107 PE=1 SV=1 - [NU107_HUMAN]	0.7557	6	20	78	254	0.953	23	17.3	0.926	23	14.1	1.171	23	48.1	0.933	23	24.8	1.574	23	56.7	1.544	23	76.4	1.192	22	63.3	1.288	22	72.1	1.149	22	74.4	0.94	24	12.5	0.915	24	16.1	1.247	24	71.4	0.966	24	18.6	1.508	24	88.4	1.62
P60900	Proteasome subunit alpha type-6 OS=Homo sapiens GN=PSMA6 PE=1 SV=1 - [PSA6_HUMAN]	0.8211	12	20	26	310	1.072	52	15	1.149	52	13.6	0.758	52	50.6	1.091	52	16.3	0.666	49	80.2	0.731	50	52.1	0.758	48	90.4	0.712	49	98.5	0.764	48	71	1.084	41	22.7	1.127	41	13.5	0.651	41	76.9	1.14	41	18.2	0.547	39	86.4	0.765
P61201	COP9 signalosome complex subunit 2 OS=Homo sapiens GN=COPS2 PE=1 SV=1 - [CSN2_HUMAN]	0.8578	9	20	50	294	0.946	27	20.4	1.083	27	29.2	0.475	24	94.6	0.978	26	32.2	0.64	24	100.5	0.659	24	82	0.365	22	99.4	0.352	19	209.2	0.425	21	282.2	0.967	26	24.6	1.085	26	16.4	0.544	22	57	1.068	26	22.3	0.49	23	64.6	0.573
P61221	ATP-binding cassette sub-family E member 1 OS=Homo sapiens GN=ABCE1 PE=1 SV=1 - [ABCE1_HUMAN]	0.6043	4	20	44	177	1.077	19	10.8	1.075	19	7	0.782	19	47.8	1.003	19	10.5	0.824	19	51.3	0.782	19	57.6	0.676	19	73.5	0.648	18	89.7	0.712	19	84.8	0.941	17	17	1.029	17	11.1	0.646	17	50.3	0.959	17	16.6	0.698	17	74.4	0.696
P61964	WD repeat-containing protein 5 OS=Homo sapiens GN=WDR5 PE=1 SV=1 - [WDR5_HUMAN]	0.9491	3	20	31	186	0.888	26	16.2	0.849	26	17.8	1.757	26	38.8	0.872	26	27.3	1.753	26	65.8	1.663	26	50.4	1.787	26	60.3	1.506	26	60.8	1.46	26	86.3	0.981	27	19.9	0.93	26	16.3	2.197	26	55.4	1.002	27	22.3	2.384	27	54.5	2.209
Q00796	Sorbitol dehydrogenase OS=Homo sapiens GN=SORD PE=1 SV=4 - [DHSO_HUMAN]	0.7815	6	20	30	189	1.083	22	19.8	1.082	22	12.9	0.722	22	38.7	1.044	22	12.5	0.541	20	74.8	0.708	21	49.3	0.663	20	70.2	0.64	20	60.5	0.696	20	112.4	1.109	25	16.5	1.084	25	12.4	0.717	24	68.5	1.061	25	19.4	0.765	23	86	0.627
Q09472	Histone acetyltransferase p300 OS=Homo sapiens GN=EP300 PE=1 SV=2 - [EP300_HUMAN]	0.493	13	20	125	440	0.812	16	37.3	0.874	16	23.1	2.243	16	48.5	0.845	16	22	2.428	16	71	2.297	16	48.5	2.375	16	66.9	2.165	15	55.8	2.873	16	36.1	0.929	14	28.8	0.909	13	38.7	2.278	14	47.4	0.923	14	33.5	3.042	14	41.5	2.011
Q12904-2	Isoform 2 of Aminoacyl tRNA synthase complex-interacting multifunctional protein 1 OS=Homo sapiens GN=AIMP1 - [AIMP1_HUMAN]	0.878	4	20	35	300	1.072	32	16.2	1.07	32	14.1	0.652	31	77.6	1.067	32	14.5	0.61	30	69	0.633	32	70.8	0.734	28	92.6	0.689	28	101.2	0.659	29	114	1.058	35	14.7	1.137	35	11.6	0.695	34	58.9	1.063	35	21	0.593	32	81.3	0.65
Q13185	Chromobox protein homolog 3 OS=Homo sapiens GN=CBX3 PE=1 SV=4 - [CBX3_HUMAN]	0.9454	4	20	36	525	0.828	55	44.2	0.729	56	35.3	2.165	57	46	0.852	55	39.2	2.535	57	38.3	2.314	57	50.7	3.082	56	54.3	2.796	55	59.2	3.146	55	56.5	0.88	52	43.8	0.812	49	46.2	2.773	52	87.4	0.856	50	45.9	3.25	53	110.5	2.871
Q13330-3	Isoform 3 of Metastasis-associated protein MTA1 OS=Homo sapiens GN=MTA1 - [MTA1_HUMAN]	0.8324	12	20	71	380	0.8	19	15.6	0.742	19	21.1	2.307	19	48.7	0.844	18	23.6	2.565	19	62.9	2.223	19	54.2	2.014	18	62.5	2.086	19	86.1	2.128	19	138.9	0.865	19	26	0.768	19	35.4	2.041	19	49.9	0.83	19	35.6	2.475	19	68	2.411
Q14126	Desmoglein-2 OS=Homo sapiens GN=DSG2 PE=1 SV=2 - [DSG2_HUMAN]	0.6055	2	20	69	241	1.079	17	17.3	0.992	17	20.8	0.867	17	33.1	1.135	17	11.9	0.835	16	28.6	0.849	17	39.2	0.881	16	46.4	1	17	27.2	0.938	17	30.6	1.017	21	22.5	0.926	21	14.9	0.944	21	39.8	1.061	21	20.3	0.802	21	39.6	0.896
Q14241	Transcription elongation factor B polypeptide 3 OS=Homo sapiens GN=TCEB3 PE=1 SV=2 - [ELOA1_HUMAN]	0.5877	2	20	71	188	0.956	16	16.3	0.98	16	21.6	1.531	16	23.7	0.922	15	24.8	1.813	16	25	1.731	16	27	1.738	16	42.7	1.72	16	32.6	1.643	16	36.5	0.82	14	26.7	0.912	14	12.7	1.861	14	27.7	0.837	14	30.1	1.834	14	46.5	1.709
Q15019-2	Isoform 2 of Septin-2 OS=Homo sapiens GN=SEPT2 - [SEPT2_HUMAN]	0.851	20	20	32	279	0.992	34	24	1.03	34	16.6	1.027	34	40.1	1.015	34	21.8	1.103	33	41.8	1.001	32	40.1	1.079	31	63.8	1.072	32	64.3	1.045	32	77	1.005	32	20.5	1.025	33	14.4	1.04	32	65.9	0.979	33	22.9	1.044	31	45.5	1.02
Q15785	Mitochondrial import receptor subunit TOM34 OS=Homo sapiens GN=TOMM34 PE=1 SV=2 - [TOM34_HUMAN]	0.8964	3	20	38	158	1.042	20	19.5	1.158	20	11.4	0.699	19	48.9	1.128	20	12.3	0.674	18	49	0.682	18	40.6	0.708	19	36.7	0.68	18	60.1	0.795	18	66.1	1.052	17	12.6	1.079	17	11	0.8	17	61.4	1.128	17	24.7	0.845	14	69.1	0.928
Q6P1N0	Coiled-coil and C2 domain-containing protein 1A OS=Homo sapiens GN=CC2D1A PE=1 SV=1 - [C2D1A_HUMAN]	0.6583	7	20	81	235	0.963	16	23	0.986	16	18.7	1.173	16	51.7	0.978	16	24.8	1.285	16	60.5	1.154	16	66.4	1.411	16	88.3	1.246	16	98.7	1.326	16	75.6	0.879	16	13.4	0.979	16	11	1.162	16	30.1	0.913	16	22.7	1.145	16	47.4	1.175
Q6UB35	Monofunctional C1-tetrahydrofolate synthase, mitochondrial OS=Homo sapiens GN=MTHFD1L PE=1 SV=1 - [C1TM_HUMAN]	0.7761	12	20	84	253	0.947	19	14	0.96	19	14.2	0.788	19	35.9	1.016	19	13.1	0.661	19	63.8	0.72	19	48.1	0.737	18	80.6	0.684	18	102.3	0.727	17	100.8	1.07	18	16.2	1.017	18	11.3	0.821	18	50	1.12	18	14	0.766	17	37.6	0.83
Q86UY0	TXNDC5 protein OS=Homo sapiens GN=TXNDC5 PE=2 SV=1 - [Q86UY0_HUMAN]	0.825	5	20	36	229	1.037	32	15.8	1.048	32	10.6	0.719	31	41.4	1.081	32	13.4	0.621	30	64.9	0.631	31	73.2	0.556	29	212.9	0.496	27	132.4	0.481	30	137.1	1.102	34	15.8	1.096	34	9.7	0.742	32	39	1.077	34	17	0.563	31	60.4	0.586
Q86Y56	Dynein assembly factor 5, axonemal OS=Homo sapiens GN=DNAAF5 PE=1 SV=4 - [DAAF5_HUMAN]	0.6655	10	20	50	173	1.196	14	14.3	1.15	14	10	0.508	12	64.1	1.097	14	11.1	0.505	11	78	0.615	13	64.8	0.545	10	48.8	0.607	9	37.2	0.618	9	42.9	1.027	13	16.6	1.081	13	27.9	0.796	12	64.4	1.044	13	16.6	0.731	12	71.6	0.849
Q8N1G4	Leucine-rich repeat-containing protein 47 OS=Homo sapiens GN=LRRC47 PE=1 SV=1 - [LRC47_HUMAN]	0.741	1	20	40	184	1.054	19	12.5	1.07	19	21.8	0.873	17	47.6	1.094	19	14.4	0.794	20	90.3	0.808	19	32.1	0.674	18	64.6	0.734	16	64.6	0.56	17	52.1	0.961	23	32.7	1.101	23	24.5	0.864	23	46.7	1.052	23	29.7	0.926	22	95.9	0.975
Q8WXH0-2	Isoform 2 of Nesprin-2 OS=Homo sapiens GN=SYNE2 - [SYNE2_HUMAN]	0.6632	26	20	520	1209	0.916	11	13.5	0.934	11	7.5	1.087	11	16.2	0.943	10	27.3	1.217	10	38.9	1.137	11	60.9	0.896	10	31.4	1.037	10	33	0.926	10	65.8	0.952	15	19.3	0.907	15	19.6	1.415	15	24.6	0.892	15	24.3	1.427	15	24.4	1.47
Q92979	Ribosomal RNA small subunit methyltransferase NEP1 OS=Homo sapiens GN=EMG1 PE=1 SV=4 - [NEP1_HUMAN]	0.9467	8	20	29	267	0.909	45	23.6	0.876	44	29.7	1.589	44	52.4	0.914	42	33.4	1.789	44	65.9	1.564	44	59.8	2.318	45	65.2	2.333	44	83.3	2.123	43	56.4	0.864	41	22.5	0.858	40	24.1	1.549	41	36.3	0.892	40	29.7	1.778	38	41.9	1.555
Q96HA7	Tonsoku-like protein OS=Homo sapiens GN=TONSL PE=1 SV=2 - [TONSL_HUMAN]	0.6038	4	20	75	232	0.864	19	22	0.894	20	28.5	1.633	19	37.1	0.92	20	27.9	1.876	19	56.4	1.817	19	63.7	1.85	19	70.4	1.915	19	74.7	1.642	18	43.2	0.871	20	43	0.941	21	32.7	1.863	20	40.8	0.803	21	31.6	1.882	20	47.5	1.666
Q96KB5	Lymphokine-activated killer T-cell-originated protein kinase OS=Homo sapiens GN=PBK PE=1 SV=3 - [TOPK_HUMAN]	0.8447	4	20	36	152	1.033	23	8.9	1.121	23	17.1	0.662	22	53.2	1.094	23	11.2	0.64	21	74	0.721	22	60.3	0.694	20	92.4	0.863	21	86.7	0.78	20	98.5	1.044	14	17.7	1.107	14	16.8	0.773	14	63.6	1.117	14	18.7	0.946	14	78.7	0.775
Q9H6F5	Coiled-coil domain-containing protein 86 OS=Homo sapiens GN=CCDC86 PE=1 SV=1 - [CCD86_HUMAN]	0.7306	4	20	40	206	0.938	27	16.2	0.883	27	33.1	2.194	27	43.4	0.878	27	23.6	2.704	27	49.6	2.113	27	55.6	3.548	27	50.4	3.621	27	61.6	3.911	27	57.2	0.885	31	29	0.819	31	43.4	2.246	31	44.2	0.858	31	28.6	2.768	31	42.3	2.345
Q9HAV4	Exportin-5 OS=Homo sapiens GN=XPO5 PE=1 SV=1 - [XPO5_HUMAN]	0.6013	18	20	79	372	1.007	23	16.9	1.063	23	12.6	0.626	23	35.6	0.986	23	14.7	0.773	20	41.8	0.667	22	42.2	0.685	21	50.8	0.617	19	82.3	0.629	20	69.6	1.058	23	12.6	1.038	23	13	0.711	23	73.2	0.902	23	25.9	0.764	20	81	0.655
Q9HC52	Chromobox protein homolog 8 OS=Homo sapiens GN=CBX8 PE=1 SV=3 - [CBX8_HUMAN]	0.7789	3	20	36	161	0.873	19	27.8	0.822	19	16.7	2.367	20	34.6	0.812	19	36.9	2.395	20	40.3	2.294	20	38.2	2.641	20	68.6	2.583	20	50.8	2.704	20	60.6	0.86	24	38.9	0.848	24	43	2.023	24	43.2	0.844	24	27.8	2.366	24	42.3	1.985
Q9NWT1	p21-activated protein kinase-interacting protein 1 OS=Homo sapiens GN=PAK1IP1 PE=1 SV=2 - [PK1IP_HUMAN]	0.6454	1	20	36	179	0.742	21	27.2	0.697	21	24.7	1.553	21	57	0.742	21	33.9	1.583	21	66.1	1.442	21	65.9	2.304	21	96.6	2.62	21	98.5	2.468	21	67	0.727	22	27.1	0.698	22	34.7	1.659	22	25.9	0.696	22	26.6	1.729	22	46.2	1.58
Q9NXV6	CDKN2A-interacting protein OS=Homo sapiens GN=CDKN2AIP PE=1 SV=3 - [CARF_HUMAN]	0.7379	4	20	48	240	0.904	20	12.6	0.924	20	11.9	1.841	20	35.2	0.925	20	11.4	2.427	20	48	1.985	20	47.4	2.52	20	49.2	2.069	20	43.8	2.039	20	39.4	0.938	14	14.7	0.941	14	22.7	1.449	13	51.2	0.86	14	20.1	1.845	13	57	1.506
Q9UHI6	Probable ATP-dependent RNA helicase DDX20 OS=Homo sapiens GN=DDX20 PE=1 SV=2 - [DDX20_HUMAN]	0.7342	7	20	67	293	1.039	20	16	1.012	20	15	0.917	19	67.8	0.979	19	13.8	0.931	20	42.3	0.955	20	56.6	0.985	18	62.6	0.831	19	79.3	0.878	19	81.9	0.992	20	16	0.974	20	12.4	0.882	19	56.9	1.087	20	13.6	0.854	19	80.7	1.07
Q9UKJ3	G patch domain-containing protein 8 OS=Homo sapiens GN=GPATCH8 PE=1 SV=2 - [GPTC8_HUMAN]	0.5739	3	20	115	317	0.808	19	26.6	0.771	19	28	1.873	19	49.5	0.762	19	26.4	2.121	19	75.2	1.969	19	51.8	2.012	19	75.1	1.563	19	74.9	1.889	19	51.3	0.913	20	32	0.831	20	36.6	1.842	23	40.9	0.837	21	21.8	2.269	22	55.8	2.06
Q9ULM3	YEATS domain-containing protein 2 OS=Homo sapiens GN=YEATS2 PE=1 SV=2 - [YETS2_HUMAN]	0.628	4	20	93	312	0.985	14	16.7	0.895	14	16.8	1.625	14	44.9	0.878	14	17	1.801	14	62.1	1.652	14	41.4	1.605	14	85.1	1.496	14	96.7	1.499	14	99.3	0.893	13	33.2	0.79	13	28.6	2.21	13	34	0.913	13	40.9	2.283	13	50.3	2.144
Q9Y3A5	Ribosome maturation protein SBDS OS=Homo sapiens GN=SBDS PE=1 SV=4 - [SBDS_HUMAN]	0.884	4	20	34	167	0.94	20	24.8	0.991	20	9.9	0.857	20	48.7	0.987	20	14.8	0.828	20	26.3	0.848	20	36.9	0.486	19	46	0.636	18	49.8	0.645	18	56.8	0.901	22	26.6	1.014	22	7.3	0.929	21	38.3	0.974	22	14.8	0.846	21	46.3	0.883
Q9Y446	Plakophilin-3 OS=Homo sapiens GN=PKP3 PE=1 SV=1 - [PKP3_HUMAN]	0.7528	8	20	69	254	1.017	21	17.6	0.979	20	22.3	1.12	20	33.9	0.987	20	13.2	1.123	20	60.7	1.071	19	44.4	1.176	19	80.7	1.36	20	67.5	1.187	19	68.5	0.991	19	12.9	0.997	20	16.1	1.162	20	37.4	1.076	19	16.4	1.161	18	42.2	1.029
Q53FS0	Actin-like 6A isoform 1 variant (Fragment) OS=Homo sapiens PE=2 SV=1 - [Q53FS0_HUMAN]	0.8462	7	20	36	422	1.014	45	27.4	0.959	45	18.6	1.711	45	42.4	0.997	45	28.5	1.588	45	48.2	1.549	45	47.8	1.687	44	64.6	1.89	42	36.4	1.735	43	53.8	0.977	53	20	0.943	52	21.4	1.648	53	43.7	0.924	53	26.5	1.61	53	50.5	1.478
Q53H60	Pre-mRNA splicing factor 17 variant (Fragment) OS=Homo sapiens PE=2 SV=1 - [Q53H60_HUMAN]	0.8307	7	20	54	181	0.825	22	31.1	0.772	22	33.3	1.907	22	37.4	0.833	22	27	2.243	22	44.4	1.869	22	36.6	1.943	22	46.7	1.816	22	38.6	1.718	22	55.4	0.991	16	43.7	0.851	16	22.2	2.163	16	37.3	0.925	16	29.9	2.28	16	29	2.076
J3KNW4	Four and a half LIM domains protein 2 OS=Homo sapiens GN=FHL2 PE=1 SV=1 - [J3KNW4_HUMAN]	0.7249	12	20	39	176	0.984	26	23.4	1.07	26	6.6	1.066	26	30.2	0.958	26	17	1.008	26	46.1	0.955	26	35.8	0.907	25	61	1.001	26	81	0.925	26	92	0.991	20	20.5	1.07	20	13	0.938	20	42.1	1.001	20	21.2	0.949	20	46.6	0.964
B2R6U8	cDNA, FLJ93125, highly similar to Homo sapiens cleavage and polyadenylation specific factor 5, 25 kDa(CPSF5), mRNA OS=Homo sapiens PE=2 SV=1 - [B2R6U8_HUMAN]	0.815	5	20	23	165	0.798	26	33	0.766	28	15.2	1.976	27	82.6	0.816	27	27.9	2.121	26	67.4	1.754	27	72	1.252	24	87.1	1.355	24	165.9	1.248	22	122.4	0.714	21	21	0.705	20	30	2.01	21	52.5	0.802	19	23.1	2.1	21	55.2	1.72
H6VRF8	Keratin 1 OS=Homo sapiens GN=KRT1 PE=3 SV=1 - [H6VRF8_HUMAN]	0.7904	6	20	63	310	1.002	21	13	1.092	21	15.8	1.245	21	27.1	0.784	21	27.3	0.993	20	38.6	0.94	20	39.8	0.803	21	86.8	1.117	20	62	0.911	20	88	0.982	22	12.3	1.106	23	22.3	1.23	23	45.9	0.747	21	27.6	1.052	22	43.5	0.908
A8K0P8	cDNA FLJ78223 OS=Homo sapiens PE=2 SV=1 - [A8K0P8_HUMAN]	0.6614	5	20	59	234	0.98	18	16.4	0.882	18	14.2	1.199	18	37.8	0.872	18	23.5	1.552	18	59.7	1.479	18	51.3	1.811	18	64.5	1.745	18	92.2	1.909	18	59.4	0.8	19	26.7	0.838	19	26.5	1.331	19	69.4	0.822	19	21.3	1.613	19	80	1.947
B7Z592	cDNA FLJ61635, highly similar to Homo sapiens likely ortholog of mouse immediate early response, erythropoietin 4 (LEREPO4), mRNA OS=Homo sapiens PE=2 SV=1 - [B7Z592_HUMAN]	0.75	6	20	45	193	1.027	20	14.8	1.127	20	8.5	0.762	19	33.5	1.026	20	15.2	0.738	18	45.3	0.782	19	32.5	0.887	18	31.6	0.924	18	32.7	0.75	19	43.5	1.058	20	19	1.078	20	11.9	0.976	19	49.1	1.042	20	11.6	1.083	19	54.6	0.958
B2R7T8	cDNA, FLJ93598, highly similar to Homo sapiens capping protein (actin filament) muscle Z-line, beta (CAPZB), mRNA OS=Homo sapiens PE=2 SV=1 - [B2R7T8_HUMAN]	0.7426	8	20	39	228	1.061	27	16.4	1.096	27	12.1	0.714	27	47.9	1.047	27	12.2	0.593	27	64.6	0.72	27	61.3	0.726	25	50.9	0.716	26	75.8	0.647	27	95.7	0.966	28	17.1	1.088	28	14.4	0.707	27	47.5	1.03	28	12.5	0.657	28	50.7	0.652
Q6Y7W6-4	Isoform 3 of PERQ amino acid-rich with GYF domain-containing protein 2 OS=Homo sapiens GN=GIGYF2 - [PERQ2_HUMAN]	0.493	17	20	89	311	1.127	20	15.3	1.16	20	13.3	0.775	20	45.3	1.145	20	15.7	0.846	19	68.8	0.805	20	61.6	0.859	19	178.8	0.946	19	114	1.03	18	120.6	1.04	18	15.2	1.063	18	11.9	0.695	18	41.2	1.08	18	20.6	0.729	18	60.8	0.701
H7BY55	Complement decay-accelerating factor OS=Homo sapiens GN=CD55 PE=1 SV=2 - [H7BY55_HUMAN]	0.7345	19	20	43	324	1.02	38	17.7	1.045	38	14	0.822	38	68.2	1.021	38	21.6	0.668	37	111.1	0.663	38	78.3	0.77	38	74.8	0.968	36	105.8	0.903	35	91	1.015	38	16.8	1.064	38	11.2	0.668	38	67.3	1.033	38	16.4	0.67	38	103.5	0.69
A0A024QZH6	Serine arginine-rich pre-mRNA splicing factor SR-A1, isoform CRA_a OS=Homo sapiens GN=SR-A1 PE=4 SV=1 - [A0A024QZH6_HUMAN]	0.4596	2	20	75	204	0.826	14	25.7	0.824	14	30.2	2.617	14	47.3	0.867	14	35.3	3.088	14	50.3	2.786	14	39	2.145	14	73.9	1.903	14	65.5	2.392	14	71.6	0.86	18	13.8	0.824	18	26.4	2.02	18	56	0.843	18	25.1	2.449	18	72.8	2.389
A0A024R8V0	Septin 9, isoform CRA_a OS=Homo sapiens GN=SEPT9 PE=3 SV=1 - [A0A024R8V0_HUMAN]	0.9313	33	20	80	469	1.065	27	14.5	1.033	27	8.5	1.316	27	34.7	1.032	27	16.5	1.273	27	57.4	1.122	26	64.8	1.317	26	52.7	1.449	26	85.8	1.432	27	79.6	0.987	28	17.7	1.009	27	16	1.137	28	42.9	0.994	27	18.3	1.064	28	73	1.165
A0A0S2Z4N8	Vasodilator-stimulated phosphoprotein isoform 2 (Fragment) OS=Homo sapiens GN=VASP PE=2 SV=1 - [A0A0S2Z4N8_HUMAN]	0.9848	10	20	39	203	0.966	22	19.8	1.094	22	5.6	0.613	20	38.7	1.012	22	35.1	0.568	20	71.1	0.652	19	54.5	0.611	19	49.9	0.722	19	41.8	0.639	18	57.6	1.131	23	37.2	1.107	23	10.4	0.683	22	66.7	1.04	24	42.1	0.469	22	95.1	0.612
P30260-2	Isoform 2 of Cell division cycle protein 27 homolog OS=Homo sapiens GN=CDC27 - [CDC27_HUMAN]	0.6771	16	19	54	221	0.938	13	36.5	0.842	12	24	2.049	13	39.4	0.831	13	20	2.594	13	67.8	2.366	13	38.1	2.192	12	33.6	1.589	12	63.2	1.885	12	86.7	0.899	18	14	0.831	18	11.1	1.829	18	36.8	0.883	18	16.3	1.875	18	55	1.792
O00299	Chloride intracellular channel protein 1 OS=Homo sapiens GN=CLIC1 PE=1 SV=4 - [CLIC1_HUMAN]	0.8133	5	19	26	419	1.093	72	15.2	1.131	72	12.5	0.577	69	64.5	1.095	72	18.4	0.486	68	90	0.529	68	61.1	0.616	66	85.7	0.633	65	73.6	0.563	65	97.3	1.051	52	18.3	1.133	52	16.8	0.685	50	72.6	1.06	52	18	0.568	49	105.1	0.635
O00499-6	Isoform II2 of Myc box-dependent-interacting protein 1 OS=Homo sapiens GN=BIN1 - [BIN1_HUMAN]	0.7261	23	19	41	271	1.027	14	11.8	1.136	14	11.3	0.863	14	45.6	1.158	14	7.7	0.645	14	54.1	0.689	14	33.7	0.739	12	80.2	0.895	13	65.8	0.874	13	94.4	1.049	18	24	1.101	18	11	0.893	16	47.3	1.07	18	11.7	0.756	18	37.4	0.86
O15020	Spectrin beta chain, non-erythrocytic 2 OS=Homo sapiens GN=SPTBN2 PE=1 SV=3 - [SPTN2_HUMAN]	0.7109	6	19	210	558	1.05	11	10.5	1.02	11	9.1	0.723	11	15.5	0.984	11	10.4	0.743	11	32.5	0.747	11	30.9	0.635	11	118	0.728	11	116.1	0.779	11	55.6	1.176	12	32.5	1.129	12	37.6	0.867	10	28.4	1.044	12	25.5	0.885	11	55.8	0.883
O15164	Transcription intermediary factor 1-alpha OS=Homo sapiens GN=TRIM24 PE=1 SV=3 - [TIF1A_HUMAN]	0.7352	4	19	66	240	0.978	13	18.6	0.818	12	21	1.611	13	58.4	0.754	13	50.5	1.706	13	73.9	1.575	13	52.7	1.588	13	60.7	1.642	12	52	1.449	12	49.4	0.924	15	21.8	0.825	15	17.1	1.988	15	31.5	0.979	15	10.9	2.159	15	39.7	1.858
O15294	UDP-N-acetylglucosamine--peptide N-acetylglucosaminyltransferase 110 kDa subunit OS=Homo sapiens GN=OGT PE=1 SV=3 - [OGT1_HUMAN]	0.566	7	19	53	203	1.122	19	18.1	0.958	19	14	1.111	19	45.7	1.015	19	15.4	1.194	19	39.8	1.106	19	51.9	0.966	17	61.6	0.862	16	83.7	1.069	15	59.8	1.034	18	12	0.906	18	12.2	1.356	18	31	0.95	18	15	1.258	16	62.8	1.24
O43823	A-kinase anchor protein 8 OS=Homo sapiens GN=AKAP8 PE=1 SV=1 - [AKAP8_HUMAN]	0.6228	5	19	53	222	0.89	18	20.4	0.87	18	11.1	1.731	18	44.3	0.897	18	14	1.784	18	54.1	1.485	18	60.2	1.662	18	85.3	1.652	18	59.2	1.973	18	49.9	0.985	21	21	0.918	21	18.6	1.912	21	68.7	0.969	21	26.9	2.17	20	68.3	1.942
O60566-3	Isoform 3 of Mitotic checkpoint serine/threonine-protein kinase BUB1 beta OS=Homo sapiens GN=BUB1B - [BUB1B_HUMAN]	0.6494	4	19	75	234	1.115	11	23.1	1.11	11	6.4	1.007	11	36.1	1.092	11	24.8	0.998	11	49.9	1.094	11	29	1.206	11	57.5	1.128	11	46.1	1.126	10	32.5	1.039	13	25	1.098	13	5.6	1.007	13	54.8	1.021	13	19.2	0.716	12	60	0.74
O60684	Importin subunit alpha-7 OS=Homo sapiens GN=KPNA6 PE=1 SV=1 - [IMA7_HUMAN]	0.8004	6	19	43	337	0.954	28	17.4	0.924	28	16.2	1.14	28	34.4	0.932	28	20	1.223	27	40.8	1.246	28	40.4	1.066	25	44.8	0.756	26	53.3	1.045	25	65.4	0.977	28	15.3	1.046	28	12.6	1.154	28	29.7	0.961	28	18.5	1.135	28	27.3	1.083
O76003	Glutaredoxin-3 OS=Homo sapiens GN=GLRX3 PE=1 SV=2 - [GLRX3_HUMAN]	0.7045	1	19	33	183	0.905	25	22.3	1.147	25	19.9	0.657	23	76.4	0.981	25	16.8	0.478	22	124	0.532	22	98.6	0.74	19	111.6	0.478	19	215.9	0.462	20	122.9	0.983	29	17.3	1.115	29	14.1	0.625	26	60.5	1.022	29	19.8	0.588	24	66.5	0.573
O96008	Mitochondrial import receptor subunit TOM40 homolog OS=Homo sapiens GN=TOMM40 PE=1 SV=1 - [TOM40_HUMAN]	0.6343	4	19	21	321	1.005	37	14.9	1.01	37	18.8	0.807	35	43.2	1.019	37	15.8	0.722	35	68.7	0.749	35	65.2	0.69	34	65.8	0.721	33	69.1	0.697	34	86.3	1.04	40	13.6	0.975	39	11.9	0.794	35	37.1	1.025	39	12.8	0.662	33	46.1	0.733
P04792	Heat shock protein beta-1 OS=Homo sapiens GN=HSPB1 PE=1 SV=2 - [HSPB1_HUMAN]	0.9512	4	19	23	522	1.046	83	24.6	1.141	84	18.7	0.657	73	72.7	1.108	83	21.3	0.594	74	84.5	0.661	78	78.4	0.646	70	96.9	0.615	66	83.4	0.686	69	85.6	1.094	83	26.1	1.136	83	18.2	0.741	76	52.8	1.129	82	22.6	0.628	72	74.6	0.729
P07737	Profilin-1 OS=Homo sapiens GN=PFN1 PE=1 SV=2 - [PROF1_HUMAN]	0.9786	3	19	24	575	1.029	87	21.4	1.103	87	12.9	0.619	83	80.7	1.026	87	21.8	0.598	80	96.7	0.655	82	74.2	0.67	76	96.6	0.582	77	131.2	0.593	80	117.4	1.034	91	21.8	1.121	91	10.8	0.623	88	69.7	1.036	91	16.5	0.51	83	89.5	0.565
P25787	Proteasome subunit alpha type-2 OS=Homo sapiens GN=PSMA2 PE=1 SV=2 - [PSA2_HUMAN]	0.7778	6	19	23	188	1.102	28	17.9	1.158	28	15.8	0.632	27	72.2	1.078	28	14.6	0.461	25	209.4	0.591	27	101.9	0.666	23	126.5	0.658	23	108.2	0.469	26	173.6	1.062	29	20.6	1.139	29	14.9	0.676	28	87.7	1.115	29	15.9	0.492	26	212.7	0.526
P32119	Peroxiredoxin-2 OS=Homo sapiens GN=PRDX2 PE=1 SV=5 - [PRDX2_HUMAN]	0.8081	4	19	25	302	1.183	36	20.5	1.179	36	15.3	0.478	34	58.4	1.211	36	19.3	0.378	31	116.5	0.515	33	120.1	0.423	32	178.7	0.465	31	149.5	0.459	33	201.9	1.113	42	23.8	1.068	42	17.1	0.592	41	58	1.125	42	20	0.522	38	71.7	0.517
P35908	Keratin, type II cytoskeletal 2 epidermal OS=Homo sapiens GN=KRT2 PE=1 SV=2 - [K22E_HUMAN]	0.7527	3	19	66	309	0.928	15	15.3	1.062	15	9.4	1.549	15	53.8	0.834	15	25	1.375	15	65.8	1.314	15	95.9	0.904	15	95.7	1.634	15	144.8	1.086	14	103.1	0.875	13	14	1.021	13	7.4	1.358	13	57.2	0.741	13	24.8	1.198	13	55.6	1.171
P45973	Chromobox protein homolog 5 OS=Homo sapiens GN=CBX5 PE=1 SV=1 - [CBX5_HUMAN]	0.8429	3	19	27	560	0.805	70	28.4	0.783	69	33.1	2.777	72	50.1	0.765	70	29.4	3.363	72	60.1	2.721	72	49.5	3.893	72	71	3.695	72	62.2	3.938	72	68.6	0.762	65	30.8	0.758	64	41	2.577	65	46.4	0.758	65	32.4	3.132	65	48	2.754
P51149	Ras-related protein Rab-7a OS=Homo sapiens GN=RAB7A PE=1 SV=1 - [RAB7A_HUMAN]	0.942	13	19	33	217	1.055	29	25.3	1.023	29	14.2	0.842	29	26.2	1.041	29	21.2	0.795	29	45.2	0.854	28	25.8	0.666	28	113.8	0.773	27	122.8	0.762	26	117.5	1.055	30	16	1.011	30	12.5	0.666	30	70.7	0.968	30	20.5	0.601	30	67.1	0.804
P60228	Eukaryotic translation initiation factor 3 subunit E OS=Homo sapiens GN=EIF3E PE=1 SV=1 - [EIF3E_HUMAN]	0.8404	13	19	49	259	0.994	20	26	1.071	20	10.2	0.644	17	25.7	1.001	20	22	0.68	18	48.3	0.718	17	32.5	0.601	16	55.3	0.581	15	48.9	0.655	16	57.1	0.849	22	28.2	1.093	22	14.2	0.584	19	32	0.927	21	22.5	0.674	16	37.6	0.673
P61160	Actin-related protein 2 OS=Homo sapiens GN=ACTR2 PE=1 SV=1 - [ARP2_HUMAN]	0.632	14	19	43	383	0.978	35	19.6	1.028	35	11.7	0.799	35	49.5	0.991	35	18.8	0.828	34	60.9	0.865	34	48.1	0.767	34	71.3	0.698	33	54.3	0.925	33	56.8	1.008	32	22.1	1.026	31	10.7	0.824	29	35.3	1.018	32	15.4	0.666	30	56.8	0.766
P62241	40S ribosomal protein S8 OS=Homo sapiens GN=RPS8 PE=1 SV=2 - [RS8_HUMAN]	0.7933	3	19	30	610	1.118	74	14.4	1.138	74	14.1	0.803	74	45.2	1.087	74	15.1	0.823	73	56.3	0.897	74	44.3	0.846	71	55.8	0.82	68	76.1	0.856	70	58.2	1.084	77	16.7	1.105	77	11.5	0.833	76	40.3	1.071	77	22.4	0.849	75	54.6	0.844
P62266	40S ribosomal protein S23 OS=Homo sapiens GN=RPS23 PE=1 SV=3 - [RS23_HUMAN]	0.7762	5	19	22	280	1.137	42	24.1	1.164	41	22.3	0.778	40	42.8	1.123	40	15.4	0.872	38	54.7	0.834	39	49.1	0.925	36	65.2	0.975	32	79.2	0.918	36	72.2	1.134	40	20.1	1.179	40	15.3	0.715	39	52.2	1.145	40	18.6	0.718	37	59.4	0.811
P62277	40S ribosomal protein S13 OS=Homo sapiens GN=RPS13 PE=1 SV=2 - [RS13_HUMAN]	0.8543	3	19	28	183	0.825	32	21.5	0.959	32	18.3	0.749	32	63.5	0.947	32	16.3	0.754	32	101.4	0.799	32	73.1	0.652	32	84.4	0.761	31	123.4	0.741	32	86.5	0.906	29	17	0.98	29	17.1	0.818	28	95.1	0.938	29	13.8	0.857	28	81.1	0.717
P62906	60S ribosomal protein L10a OS=Homo sapiens GN=RPL10A PE=1 SV=2 - [RL10A_HUMAN]	0.6959	3	19	26	308	1.045	51	18.3	1.017	51	13.8	0.703	49	42.5	1.005	51	13.3	0.718	50	68.7	0.783	51	36.2	0.73	49	86.4	0.624	44	105.6	0.72	48	81.9	1.138	48	18.6	1.044	48	14.1	0.766	48	46.4	1.05	48	11	0.857	48	51.4	0.764
P63010	AP-2 complex subunit beta OS=Homo sapiens GN=AP2B1 PE=1 SV=1 - [AP2B1_HUMAN]	0.6009	23	19	61	292	1.127	14	19.6	1.03	14	12.5	0.749	14	59.6	1.053	14	17.3	0.72	13	64.2	0.785	14	60.6	0.877	13	130.3	1.032	13	79	1.065	13	106.9	1.032	15	11.9	1.017	15	14.6	0.685	14	43.3	0.984	15	18.1	0.639	14	48.3	0.782
P63208	S-phase kinase-associated protein 1 OS=Homo sapiens GN=SKP1 PE=1 SV=2 - [SKP1_HUMAN]	0.9877	9	19	26	324	1.014	37	20.1	1.074	37	14.2	0.91	36	40.9	1.031	37	21.9	1.046	34	34.3	0.881	36	39.4	1.027	34	57.7	0.969	34	81.4	0.963	33	55.6	1.048	45	20.7	1.072	45	14.4	1.045	43	38.3	1.061	44	21.9	1.011	42	40.6	1.019
Q02543	60S ribosomal protein L18a OS=Homo sapiens GN=RPL18A PE=1 SV=2 - [RL18A_HUMAN]	0.8864	12	19	34	292	0.98	31	21.4	0.993	31	15.1	0.837	26	73	0.984	31	28.2	1.018	29	89	1.077	28	59.8	1.082	26	88	0.988	25	59.2	1.174	27	73.2	1.007	32	21.4	0.999	31	15.3	0.83	30	90	1.001	32	29.9	1.018	27	83.8	1.012
Q06323	Proteasome activator complex subunit 1 OS=Homo sapiens GN=PSME1 PE=1 SV=1 - [PSME1_HUMAN]	0.8434	7	19	30	152	0.884	21	9.2	1.071	21	11.6	0.461	20	45.7	1.003	21	12.4	0.446	20	84	0.415	19	76.5	0.321	19	86.3	0.518	19	75.2	0.431	18	82.9	0.873	21	26.5	1.135	21	15.7	0.46	20	64.1	0.969	21	25.5	0.357	19	67.5	0.388
Q08378	Golgin subfamily A member 3 OS=Homo sapiens GN=GOLGA3 PE=1 SV=2 - [GOGA3_HUMAN]	0.7997	3	19	138	473	1.001	10	15.4	1.029	10	10.8	0.924	10	34	1.041	10	10.5	0.995	10	59.1	1.055	10	70.9	0.994	10	114.2	1.121	10	116.7	0.938	10	114.7	1.021	12	6.2	1.002	12	4.5	0.823	12	30.1	1.037	12	16.6	0.751	12	68.9	0.768
Q0VDF9	Heat shock 70 kDa protein 14 OS=Homo sapiens GN=HSPA14 PE=1 SV=1 - [HSP7E_HUMAN]	0.8271	5	19	48	224	1.064	19	17.8	1.138	19	14.6	0.887	19	25.9	1.067	19	13.6	0.741	19	54.4	0.808	19	37.7	0.925	18	48.7	0.853	18	68.7	0.701	17	49.8	1.076	20	11	1.131	21	8.3	0.806	20	45.4	1.076	21	21	0.722	20	67.2	0.845
Q10713	Mitochondrial-processing peptidase subunit alpha OS=Homo sapiens GN=PMPCA PE=1 SV=2 - [MPPA_HUMAN]	0.6762	7	19	34	155	0.977	21	13.7	0.998	21	13.7	0.689	21	57.1	0.964	21	13.2	0.722	21	67.7	0.767	20	71.2	0.597	19	92.4	0.681	21	79.5	0.701	20	65.8	1.002	18	9.7	0.979	18	14	0.654	18	72.3	0.934	18	14.9	0.544	18	65.4	0.612
Q12824	SWI/SNF-related matrix-associated actin-dependent regulator of chromatin subfamily B member 1 OS=Homo sapiens GN=SMARCB1 PE=1 SV=2 - [SNF5_HUMAN]	0.8727	12	19	36	208	0.779	26	18.4	0.763	25	16.8	1.979	26	60.9	0.782	26	15.1	2.023	26	49.7	1.93	26	36.5	1.85	25	91.1	1.568	26	72	1.5	25	92.2	0.784	22	32.9	0.782	21	36.7	1.958	22	55.8	0.857	21	13.7	2.282	22	50.1	2.029
Q13112	Chromatin assembly factor 1 subunit B OS=Homo sapiens GN=CHAF1B PE=1 SV=1 - [CAF1B_HUMAN]	0.6995	2	19	49	206	0.75	17	15.5	0.749	17	30.9	1.849	17	37.8	0.74	17	40.6	2.477	17	78.1	1.945	17	41.2	2.249	17	63.8	1.858	16	93.1	1.837	17	82.3	0.82	22	23.4	0.761	22	30.6	2.393	21	44.7	0.826	22	30.1	2.457	21	42.1	1.975
Q13162	Peroxiredoxin-4 OS=Homo sapiens GN=PRDX4 PE=1 SV=1 - [PRDX4_HUMAN]	0.7232	4	19	29	240	1.124	29	23.5	1.083	29	9.1	0.773	29	65.3	1.147	29	18.1	0.69	28	101.8	0.607	29	76.1	0.562	29	124.5	0.637	27	151.5	0.578	29	175	1.136	28	22	1.085	28	10	0.882	28	37.2	1.115	28	15.7	0.817	27	82.1	0.731
Q13838	Spliceosome RNA helicase DDX39B OS=Homo sapiens GN=DDX39B PE=1 SV=1 - [DX39B_HUMAN]	0.8879	42	19	55	785	0.895	56	21.5	0.806	55	29.3	1.732	57	43.6	0.862	56	21.7	1.926	56	47	1.683	57	52.1	1.448	56	67.9	1.3	55	72	1.136	55	56.1	0.891	52	27.7	0.835	52	27.6	1.685	52	38.4	0.891	52	26.8	2.018	51	45.6	1.786
Q14694-2	Isoform 2 of Ubiquitin carboxyl-terminal hydrolase 10 OS=Homo sapiens GN=USP10 - [UBP10_HUMAN]	0.5154	11	19	42	195	1.039	19	14.3	1.012	19	15.7	0.794	18	52.1	1.041	19	9	0.787	18	59.5	0.724	18	45.9	1.018	17	77.2	1.012	17	77.3	1.024	17	67.2	1.048	20	16.6	1.091	20	18.1	0.735	18	39	1.092	20	12.8	0.746	20	58.6	0.745
Q14847	LIM and SH3 domain protein 1 OS=Homo sapiens GN=LASP1 PE=1 SV=2 - [LASP1_HUMAN]	0.6437	13	19	37	284	1.059	35	18.5	1.046	35	17.7	0.92	32	72	1.061	35	12.4	1.047	32	78.8	0.864	33	58.7	1.066	31	111.5	1.242	34	156.7	1.145	34	128	0.995	32	14.6	1.126	32	17.5	0.762	31	63.8	1.006	32	16	0.663	31	65.8	0.751
Q14C86-5	Isoform 5 of GTPase-activating protein and VPS9 domain-containing protein 1 OS=Homo sapiens GN=GAPVD1 - [GAPD1_HUMAN]	0.4917	28	19	86	313	1.067	17	12.3	1.106	17	9.2	0.803	17	25.6	1.1	17	11.6	0.75	17	59.4	0.782	16	25.8	0.965	17	71.3	0.768	17	83.5	0.834	17	88.4	1.1	18	15	1.107	18	13.4	0.782	17	49.4	1.063	17	11.8	0.79	17	68.3	0.796
Q15022	Polycomb protein SUZ12 OS=Homo sapiens GN=SUZ12 PE=1 SV=3 - [SUZ12_HUMAN]	0.7916	3	19	61	233	0.773	19	36.2	0.7	19	50.9	1.989	20	94.5	0.798	19	40	2.475	20	98.6	2.115	20	84.3	3.013	19	122	2.697	20	107.5	2.68	20	165.4	0.891	19	20.2	0.828	19	24.1	1.995	20	27	0.91	20	27	2.445	19	43	2.05
Q16630-2	Isoform 2 of Cleavage and polyadenylation specificity factor subunit 6 OS=Homo sapiens GN=CPSF6 - [CPSF6_HUMAN]	0.4541	6	19	40	329	0.834	34	23.4	0.726	34	36.8	2.315	34	68.6	0.825	34	35	2.291	34	68.3	2.135	34	54.9	1.778	33	49.2	1.613	33	87.8	1.698	34	64.7	0.752	35	32.7	0.719	35	45.4	2.739	34	51.1	0.835	34	25	2.585	35	74.2	2.289
Q4J6C6	Prolyl endopeptidase-like OS=Homo sapiens GN=PREPL PE=1 SV=1 - [PPCEL_HUMAN]	0.7111	7	19	50	179	0.965	18	15.9	1.016	18	13.6	0.896	17	59.3	0.998	18	11.8	0.799	17	52.7	0.864	18	49.9	0.642	17	72.4	0.563	18	56.1	0.635	18	100.1	0.951	17	17.2	0.988	17	10.5	0.877	17	35.9	0.98	17	13.7	0.768	16	58.8	0.899
Q4V328	GRIP1-associated protein 1 OS=Homo sapiens GN=GRIPAP1 PE=1 SV=1 - [GRAP1_HUMAN]	0.8359	10	19	95	344	1.021	16	17.2	1.053	16	16	0.896	15	48.9	0.991	16	23.6	1.188	15	74.9	1.063	15	39.7	1.262	14	50	1.131	15	70.8	1.224	15	61.1	1.079	12	14.3	1.162	12	12.7	0.831	11	25.8	1.019	12	16.4	0.903	11	23.4	0.787
Q5JRA6	Melanoma inhibitory activity protein 3 OS=Homo sapiens GN=MIA3 PE=1 SV=1 - [MIA3_HUMAN]	0.6675	5	19	143	418	0.998	10	27.1	0.945	10	11.8	0.978	10	22.6	1.008	10	17.9	0.87	10	13.8	1.016	11	26.2	0.769	9	40.5	0.731	10	107.8	0.772	10	98.1	1.032	12	29.5	0.871	11	26	0.899	11	56.1	1.002	11	20.3	1.539	12	52	1.204
Q5T200	Zinc finger CCCH domain-containing protein 13 OS=Homo sapiens GN=ZC3H13 PE=1 SV=1 - [ZC3HD_HUMAN]	0.6187	9	19	185	544	0.839	15	21.8	0.875	15	23.6	1.969	15	52.4	0.852	15	16.4	2.366	15	73.7	2.052	15	58.6	2.61	15	92.4	2.466	15	80.3	2.776	15	68.4	0.85	16	24.1	0.853	16	24.4	2.036	16	52.1	0.848	16	22.5	2.227	16	49.2	1.874
Q5T280	Putative methyltransferase C9orf114 OS=Homo sapiens GN=C9orf114 PE=1 SV=3 - [CI114_HUMAN]	0.7048	4	19	33	156	0.881	19	25.9	0.825	19	31.4	2.033	20	35.4	0.904	19	31.7	2.278	20	59.6	2.212	20	50.7	3.75	20	50.6	3.241	20	66.6	3.256	20	62.3	0.937	24	16.1	0.806	24	27.8	2.019	24	48.6	0.929	24	30.3	2.378	24	54.2	2.005
Q6NZI2	Polymerase I and transcript release factor OS=Homo sapiens GN=PTRF PE=1 SV=1 - [PTRF_HUMAN]	0.6897	6	19	42	186	1.072	22	14.4	1.047	22	14.6	0.726	22	41.1	1.068	22	22.3	0.633	21	30.5	0.699	21	25	0.714	20	43.4	0.752	20	76.4	0.669	21	84.4	0.987	17	16.1	0.981	17	22.7	0.669	16	37	1.011	17	18.5	0.63	16	81.3	0.538
Q6UN15-3	Isoform 3 of Pre-mRNA 3'-end-processing factor FIP1 OS=Homo sapiens GN=FIP1L1 - [FIP1_HUMAN]	0.5135	6	19	32	210	0.877	25	20	0.768	26	34.3	1.954	26	54.1	0.875	25	26.8	1.907	26	59.9	1.915	25	50.6	1.909	25	74.1	1.633	25	58.4	2.062	26	69.4	0.885	23	27	0.91	23	25.4	1.958	23	64.3	0.945	23	18.7	2.19	23	71.1	1.868
Q86UK7-3	Isoform 3 of Zinc finger protein 598 OS=Homo sapiens GN=ZNF598 - [ZN598_HUMAN]	0.6325	6	19	58	222	0.992	16	13.1	1.04	16	15.2	1.128	16	55.4	0.881	16	26.2	1.074	16	49.8	1.073	16	44.7	1.076	16	67.4	1.311	16	108.1	1.474	15	58.1	1.085	14	17.9	1.091	14	18.6	1.19	14	41.7	1.053	14	14	0.899	14	63.7	1.121
Q8N684-3	Isoform 3 of Cleavage and polyadenylation specificity factor subunit 7 OS=Homo sapiens GN=CPSF7 - [CPSF7_HUMAN]	0.5623	17	19	38	237	0.845	33	17.6	0.82	33	25.3	2.098	33	51	0.848	33	20.1	2.366	33	39	2.289	33	34.4	2.351	33	47.8	2.119	33	53.1	2.383	32	48.3	0.885	30	23.4	0.815	30	31.9	2.263	30	34.4	0.864	30	18	2.24	30	36.5	2.286
Q8N8S7	Protein enabled homolog OS=Homo sapiens GN=ENAH PE=1 SV=2 - [ENAH_HUMAN]	0.6261	11	19	53	270	1.045	22	19.9	1.118	22	12.8	0.682	22	56.1	1.09	22	23.6	0.666	22	69.1	0.734	22	56.4	0.63	22	87.2	0.71	22	103.6	0.598	22	80.5	1.085	23	14.9	1.126	23	8.7	0.786	22	35.2	1.066	23	16.1	0.738	22	62.6	0.696
Q8NDD1-2	Isoform 2 of Uncharacterized protein C1orf131 OS=Homo sapiens GN=C1orf131 - [CA131_HUMAN]	0.7304	33	19	39	148	0.874	14	20.9	0.903	14	25.8	1.772	14	64.6	0.968	14	13.5	1.731	14	82.9	1.737	14	86.6	2.876	14	85.7	2.733	14	129.8	2.961	13	148.7	0.932	19	21.4	0.869	19	19.5	1.805	19	60.5	0.886	19	26.1	2.368	19	57.3	1.738
Q8NEY1-3	Isoform 3 of Neuron navigator 1 OS=Homo sapiens GN=NAV1 - [NAV1_HUMAN]	0.6393	13	19	136	358	1.069	14	10.4	1.098	14	7.6	1.159	14	18.2	1.131	14	18.3	1.12	14	41.9	1.169	14	28.1	1.11	14	43.3	1.106	14	37.2	1.201	13	31.3	1.068	11	8.4	1.089	11	8.1	1.003	11	22.4	1.082	11	16.7	1.088	11	16.6	1.056
Q92522	Histone H1x OS=Homo sapiens GN=H1FX PE=1 SV=1 - [H1X_HUMAN]	0.7324	1	19	30	230	0.826	28	37.3	0.802	28	24.1	2.787	28	33.7	0.812	28	28.3	3.212	28	36.2	2.809	28	38.7	2.591	28	52.3	2.523	27	83.7	2.862	28	49.8	0.77	31	33.9	0.79	31	31.1	2.391	31	35.6	0.822	31	25.1	2.809	31	52.3	2.624
Q96R06	Sperm-associated antigen 5 OS=Homo sapiens GN=SPAG5 PE=1 SV=2 - [SPAG5_HUMAN]	0.808	8	19	93	287	1.039	18	17.4	1.105	17	16.6	0.882	16	25.3	1.065	18	10.7	0.918	17	44.9	0.927	16	34.8	0.922	15	62.7	0.916	14	56.4	0.91	15	51.8	1.011	11	11.8	1.089	11	22.3	0.818	11	22.1	1.023	11	11.6	0.82	10	39.4	0.778
Q9BT78	COP9 signalosome complex subunit 4 OS=Homo sapiens GN=COPS4 PE=1 SV=1 - [CSN4_HUMAN]	0.8966	8	19	37	262	1.011	28	18.4	1.061	28	17.6	0.826	28	53.1	1.043	28	11.5	0.824	27	73	0.728	27	61.2	0.899	26	66.3	0.952	26	93.7	0.885	25	83.7	1.008	26	20.8	1.14	26	12.3	0.779	25	73.5	1.064	26	24.9	0.707	26	93.8	0.776
Q9BZ95	Histone-lysine N-methyltransferase NSD3 OS=Homo sapiens GN=WHSC1L1 PE=1 SV=1 - [NSD3_HUMAN]	0.6367	7	19	89	269	0.807	16	25.8	0.759	16	21.1	1.854	16	67.8	0.847	16	20.6	1.951	16	51.5	1.703	16	25.5	2.16	16	78.5	1.987	15	73.6	1.795	16	41.6	0.813	11	27.4	0.683	12	72.7	2.364	12	56.1	0.756	11	43.6	3.056	11	61.1	2.38
Q9H078-2	Isoform 2 of Caseinolytic peptidase B protein homolog OS=Homo sapiens GN=CLPB - [CLPB_HUMAN]	0.7533	10	19	63	177	1.05	16	23.4	1.011	16	17	0.888	16	39.2	1.189	16	30.6	0.639	16	27.3	0.617	16	31	0.58	15	58.8	0.646	15	64	0.5	15	66.6	1.129	16	24.4	0.999	16	8.1	0.895	16	29.7	1.165	16	10	0.68	15	57.1	0.756
Q9H6S0	Probable ATP-dependent RNA helicase YTHDC2 OS=Homo sapiens GN=YTHDC2 PE=1 SV=2 - [YTDC2_HUMAN]	0.6483	5	19	103	265	0.919	9	20.7	1.074	9	16.5	0.596	9	35.9	0.982	9	19.9	0.61	7	52.7	0.603	9	38.3	0.525	8	40.4	0.503	7	34	0.536	8	82.7	1.043	11	15.9	1.021	11	14.8	0.674	11	21.9	0.974	11	7.8	0.766	11	35.7	0.733
Q9H6Y2	WD repeat-containing protein 55 OS=Homo sapiens GN=WDR55 PE=1 SV=2 - [WDR55_HUMAN]	0.8642	5	19	35	177	0.897	24	19.2	0.975	24	24.9	1.359	24	35.6	1.016	24	22.8	1.707	24	40.2	1.555	24	30.4	2.494	23	51.8	2.211	23	76.2	2.622	24	89.9	0.875	21	34.2	0.946	21	31.9	1.284	21	18.8	0.895	21	27.2	1.396	21	59.9	1.336
Q9H9B1	Histone-lysine N-methyltransferase EHMT1 OS=Homo sapiens GN=EHMT1 PE=1 SV=4 - [EHMT1_HUMAN]	0.6433	24	19	75	312	0.947	17	24.2	0.894	17	11.6	1.645	17	46.2	0.938	17	20.4	1.912	17	72.6	1.68	17	30.1	1.734	17	76.1	2.043	17	66.5	2.1	16	76.5	1.098	18	20.2	0.996	19	17	1.803	19	32.4	1.01	18	29.1	1.916	19	51.8	1.981
Q9NW82	WD repeat-containing protein 70 OS=Homo sapiens GN=WDR70 PE=1 SV=1 - [WDR70_HUMAN]	0.7248	5	19	59	237	0.978	18	14.8	1.018	18	16.2	1.54	18	34.2	0.991	18	13.6	1.549	18	29.8	1.377	18	26.4	1.528	18	39.3	1.625	18	52.8	1.321	18	49.3	1.027	15	18.3	1.03	15	12.8	1.387	15	52.2	1.007	15	19	1.339	15	61	1.277
Q9NWB6	Arginine and glutamate-rich protein 1 OS=Homo sapiens GN=ARGLU1 PE=1 SV=1 - [ARGL1_HUMAN]	0.8095	5	19	47	185	0.794	15	30.3	0.675	15	46.5	2.44	15	63.2	0.787	15	32.7	2.592	15	79.3	2.249	15	68	2.196	15	140.6	1.918	15	143	2.32	15	116.4	0.796	16	35	0.754	16	42.7	2.487	16	77.8	0.869	16	36.1	2.606	16	76	2.289
Q9NZN4	EH domain-containing protein 2 OS=Homo sapiens GN=EHD2 PE=1 SV=2 - [EHD2_HUMAN]	0.8932	8	19	50	203	1.08	14	22.5	0.933	15	15.4	0.99	14	43.6	1.037	15	25.8	0.796	14	30.5	0.92	14	39.6	0.611	13	147.3	0.398	12	116.9	0.68	11	122.5	0.946	18	28.1	0.932	18	14.6	0.847	18	30.7	0.968	18	20.6	0.872	17	27.1	0.908
Q9P265	Disco-interacting protein 2 homolog B OS=Homo sapiens GN=DIP2B PE=1 SV=3 - [DIP2B_HUMAN]	0.5419	12	19	89	202	1.113	13	29.2	0.983	13	18.7	0.932	12	40.2	1.023	13	27.5	1.03	13	45.9	0.973	12	57.9	1.22	11	46.5	0.964	12	82.8	1.314	11	58.8	1.046	13	18.6	1.122	13	16.4	0.768	13	40.3	1.058	13	30.7	0.791	13	84.7	0.959
Q9UJS0-2	Isoform 2 of Calcium-binding mitochondrial carrier protein Aralar2 OS=Homo sapiens GN=SLC25A13 - [CMC2_HUMAN]	0.7589	7	19	50	202	0.935	19	22.2	0.863	18	24.2	0.808	17	35.5	1.019	19	19.8	0.689	19	103.8	0.839	18	85.2	0.67	16	81.4	0.736	13	57	0.718	16	61.9	0.915	22	20.5	0.828	22	19.9	0.683	21	47.2	0.959	22	15.3	0.73	22	89.3	0.689
Q9Y232	Chromodomain Y-like protein OS=Homo sapiens GN=CDYL PE=1 SV=2 - [CDYL1_HUMAN]	0.7341	12	19	67	250	0.864	21	23.5	0.848	21	25.8	2.301	21	57.2	0.717	21	45.8	2.719	21	40	2.044	21	52.6	2.354	21	63.8	2.481	21	75.3	2.005	21	66.5	0.773	21	28.1	0.741	21	33.6	2.599	22	17	0.807	21	27.9	3.237	22	25.6	2.652
Q9Y450	HBS1-like protein OS=Homo sapiens GN=HBS1L PE=1 SV=1 - [HBS1L_HUMAN]	0.7047	19	19	51	182	1.037	15	11.2	0.988	15	14.9	1.096	15	15.7	1.001	15	10.6	1.097	15	57.5	1.051	15	39.2	1.167	15	65.1	1.169	14	38	1.129	14	61.5	1.043	18	15.5	1.095	18	12.6	1.137	18	32.5	1.023	18	22.2	1.214	18	22.2	1.166
Q9Y6X9	MORC family CW-type zinc finger protein 2 OS=Homo sapiens GN=MORC2 PE=1 SV=2 - [MORC2_HUMAN]	0.6919	6	19	98	262	0.931	15	35.2	0.929	14	10.9	1.922	14	29.5	0.916	15	14.2	2.402	14	42.2	1.94	15	32.2	2.776	14	50.2	2.7	14	60.8	2.556	15	42.7	0.836	18	18.5	0.86	18	10.3	1.743	18	27.4	0.882	18	17.7	2.106	18	37.9	1.903
D3DQS4	Formin binding protein 4, isoform CRA_d OS=Homo sapiens GN=FNBP4 PE=4 SV=1 - [D3DQS4_HUMAN]	0.4789	6	19	55	203	0.909	15	16	0.839	15	19.4	2.402	15	32	0.872	15	26.6	2.302	15	44.8	2.303	15	47.2	2.555	15	24.4	2.214	15	39.2	2.192	15	62.8	0.903	16	19.8	0.875	16	13	2.242	16	36.9	0.91	16	20.9	2.368	16	31.1	2.414
O95834-3	Isoform 3 of Echinoderm microtubule-associated protein-like 2 OS=Homo sapiens GN=EML2 - [EMAL2_HUMAN]	0.6518	19	19	53	221	1.053	16	14.1	1.065	16	16.4	0.804	16	43.9	1.036	16	12.2	0.716	15	71	0.745	16	54.9	0.862	15	57.7	0.735	15	69.7	0.802	14	61.1	1.127	17	12.2	1.181	17	12.9	0.814	17	56.6	1.065	17	22	0.646	16	85.6	0.734
Q9BTQ7	Similar to ribosomal protein L23 (Fragment) OS=Homo sapiens PE=2 SV=1 - [Q9BTQ7_HUMAN]	0.9403	8	19	25	322	1.135	41	8.7	1.058	42	16.1	0.943	42	32	1.062	42	15.9	1.006	42	34.9	1.023	42	37.1	1.172	41	64.3	1.204	41	75.2	1.086	41	62.1	1.089	44	21.7	1.117	44	17.5	0.999	44	35.7	1.059	44	19.6	0.891	44	53.8	0.906
B2RBP3	cDNA, FLJ95615, highly similar to Homo sapiens ubiquitin-activating enzyme E1C (UBA3 homolog, yeast)(UBE1C), mRNA OS=Homo sapiens PE=2 SV=1 - [B2RBP3_HUMAN]	0.7495	11	19	36	183	1.094	19	19.1	1.178	19	25	0.591	19	77.9	1.094	19	21.2	0.464	19	86.2	0.572	19	82	0.777	18	129.7	0.634	17	124.8	0.641	18	120.5	1.064	23	10.6	1.152	23	16	0.633	22	37.7	1.065	23	15.1	0.569	22	94	0.594
B2R959	cDNA, FLJ94229, highly similar to Homo sapiens heterogeneous nuclear ribonucleoprotein L (HNRPL),mRNA OS=Homo sapiens PE=2 SV=1 - [B2R959_HUMAN]	0.7616	5	19	49	1379	0.855	83	36.7	0.798	83	43.3	2.585	82	75.5	0.854	80	34	3.11	83	79.8	2.715	83	88.4	3.263	82	93.7	3.083	80	83.7	3.066	81	90.7	0.901	92	32.6	0.8	91	41.1	2.583	92	68	0.868	90	30.8	2.984	92	73.8	2.632
B4DYZ1	RNA helicase OS=Homo sapiens PE=2 SV=1 - [B4DYZ1_HUMAN]	0.6787	7	19	61	192	0.859	18	23.2	0.744	18	20.3	1.643	18	56.4	0.751	17	27.4	2.118	18	70	2.027	18	50.7	1.991	18	81.8	1.828	18	60.4	1.902	18	63.3	0.77	19	27.2	0.713	18	26.4	1.949	19	19.9	0.767	19	27.1	2.3	19	31.9	2.09
B7ZL27	CCDC55 protein (Fragment) OS=Homo sapiens GN=CCDC55 PE=2 SV=1 - [B7ZL27_HUMAN]	0.8277	9	19	84	263	0.871	19	16.9	0.856	19	20.6	1.944	19	35.6	0.848	19	21.7	2.324	19	53	1.894	19	33.5	2.392	19	52.3	2.392	19	71.8	2.196	19	77.3	0.916	14	38	0.854	14	25	2.222	14	48	0.851	14	15.4	2.274	14	43.3	2
B2RD09	cDNA, FLJ96406, highly similar to Homo sapiens NOL1/NOP2/Sun domain family, member 5 (NSUN5), transcript variant 1, mRNA OS=Homo sapiens PE=2 SV=1 - [B2RD09_HUMAN]	0.7532	16	19	32	146	1.05	18	20.7	0.975	18	14.9	1.425	18	43	0.995	18	15.1	1.375	18	56	1.301	18	44.4	1.791	18	75.9	1.839	16	88.5	1.457	16	70.1	0.971	18	10.2	1	18	22.1	1.283	18	75.4	0.972	18	11.2	1.418	17	90.4	1.231
M0R0F0	40S ribosomal protein S5 (Fragment) OS=Homo sapiens GN=RPS5 PE=1 SV=1 - [M0R0F0_HUMAN]	0.915	6	19	27	445	1.12	50	14	1.104	50	15.8	0.972	48	47.5	1.078	50	17.7	0.917	49	60	0.963	49	60.4	1.203	46	61.7	1.076	44	53.7	1.012	44	49.2	1.055	52	20.1	1.07	52	12.4	0.985	49	45	1.057	52	13.1	1.039	46	70	0.948
A0A0C4DG17	40S ribosomal protein SA OS=Homo sapiens GN=RPSA PE=1 SV=1 - [A0A0C4DG17_HUMAN]	0.7	8	19	25	562	1.069	81	15.1	1.08	82	14.9	0.801	79	60.8	1.1	81	12.5	0.763	79	59.8	0.838	80	44.6	0.755	77	81.5	0.768	76	88.1	0.719	75	78.5	1.086	80	16.4	1.12	80	17	0.778	78	44.4	1.077	79	17.7	0.743	77	51.3	0.769
A0A024QZP7	Cell division cycle 2, G1 to S and G2 to M, isoform CRA_a OS=Homo sapiens GN=CDC2 PE=1 SV=1 - [A0A024QZP7_HUMAN]	0.8418	126	19	33	320	1	39	21.9	0.96	39	17.7	1.134	38	26.9	0.994	39	17.7	1.06	37	45.8	1.121	39	36.1	0.845	37	93.4	0.967	36	61.5	0.958	36	64.5	0.975	34	15.8	1.028	34	14.7	1.029	33	46	0.95	34	17.2	1.042	33	50.8	1.045
B4DT77	Annexin OS=Homo sapiens PE=2 SV=1 - [B4DT77_HUMAN]	0.8958	8	18	41	335	0.903	33	24.7	0.957	33	18.3	1.658	33	30.7	0.963	33	27.2	1.676	33	34.5	1.451	33	46.4	1.501	33	72	1.393	31	47.5	1.593	32	76.3	0.903	26	19.2	0.912	27	15.1	1.608	26	34.4	0.939	27	16.8	1.665	27	43.6	1.559
B5MCF9	Pescadillo homolog OS=Homo sapiens GN=PES1 PE=1 SV=1 - [B5MCF9_HUMAN]	0.8004	6	18	71	435	0.792	25	37.3	0.755	25	35.9	1.854	25	63.9	0.748	25	41	2.607	25	95	2.42	25	75.6	2.721	25	125	2.161	25	161.1	2.891	25	87.5	0.672	21	42.4	0.596	21	30.1	2.154	21	57.3	0.651	21	48.1	2.51	21	84.2	2.54
C9JGI3	Thymidine phosphorylase (Fragment) OS=Homo sapiens GN=TYMP PE=1 SV=1 - [C9JGI3_HUMAN]	0.818	8	18	36	170	1.011	25	20.7	1.145	25	14.2	0.794	22	41.2	1.016	25	17.8	0.752	20	53.4	0.829	21	43	0.878	17	91	0.733	17	126.8	0.826	18	92.1	1.04	13	7.4	1.109	13	8.2	0.608	12	30.7	1.041	12	9.9	0.59	12	25.9	0.696
O95251-4	Isoform 4 of Histone acetyltransferase KAT7 OS=Homo sapiens GN=KAT7 - [KAT7_HUMAN]	0.8003	14	18	70	228	0.847	16	14.5	0.723	16	35	1.914	16	49.4	0.776	16	35.8	2.188	16	62.6	2.013	16	44.5	2.269	15	61	2.101	15	87.3	1.899	16	68.6	0.867	17	11	0.79	17	15.9	1.751	17	68.3	0.938	17	19.9	2.107	17	71.3	1.845
G8JLB3	tRNA pseudouridine synthase (Fragment) OS=Homo sapiens GN=PUS1 PE=1 SV=1 - [G8JLB3_HUMAN]	0.9531	10	18	51	185	0.984	19	20.2	0.977	19	17.7	0.919	17	57.9	1.002	19	19.4	0.79	17	72.6	0.824	17	86	0.763	17	90.2	0.698	17	109.2	0.733	16	99.6	0.952	17	36	0.981	17	17	0.875	15	44.6	1.037	17	25.1	0.79	15	53.5	0.869
O00186	Syntaxin-binding protein 3 OS=Homo sapiens GN=STXBP3 PE=1 SV=2 - [STXB3_HUMAN]	0.7804	1	18	53	185	1.026	17	14	0.962	17	16.2	1.003	17	26.1	1.026	17	19.4	1.094	17	32.8	1.224	16	33.3	1.133	16	53.1	0.96	15	50.1	1.057	15	23.7	0.983	18	14.2	0.966	18	14.7	0.81	18	26.9	0.99	18	13.5	1.022	17	35.7	0.968
O00764	Pyridoxal kinase OS=Homo sapiens GN=PDXK PE=1 SV=1 - [PDXK_HUMAN]	0.8109	6	18	36	208	1.076	24	15.5	1.121	25	21.9	0.518	24	68.3	1.12	25	15.4	0.524	24	53.7	0.688	24	59	0.53	23	98.6	0.473	22	81.4	0.485	24	116.2	1.098	22	15.2	1.151	22	16.8	0.519	21	87.5	1.081	22	15.2	0.535	20	138.7	0.584
O14929	Histone acetyltransferase type B catalytic subunit OS=Homo sapiens GN=HAT1 PE=1 SV=1 - [HAT1_HUMAN]	0.6778	4	18	38	186	1.058	24	22.9	1.032	24	15.7	0.569	23	38.2	1	24	23.4	0.437	24	78.4	0.523	24	43.4	0.592	23	88.5	0.388	21	69.4	0.569	22	70.7	1.069	20	16.3	1.155	20	9.5	0.571	20	55.7	1.076	20	24	0.477	19	30.3	0.503
O15031	Plexin-B2 OS=Homo sapiens GN=PLXNB2 PE=1 SV=3 - [PLXB2_HUMAN]	0.5669	9	18	99	313	1	15	20.7	0.994	15	10.6	0.925	15	37.3	0.958	15	15.9	0.863	14	38.3	0.745	14	40.5	0.918	13	55.3	0.865	14	56.6	0.866	14	45.2	1.021	11	16.9	1.036	11	21.7	0.976	10	32.5	1.004	10	12.2	1.004	10	25.3	0.991
O15144	Actin-related protein 2/3 complex subunit 2 OS=Homo sapiens GN=ARPC2 PE=1 SV=1 - [ARPC2_HUMAN]	0.87	7	18	32	139	0.949	22	24.9	1.069	21	15.3	0.684	21	25.3	0.992	21	18	0.649	21	51.5	0.672	21	32	0.573	21	89.3	0.549	20	65	0.481	21	68.1	0.954	18	14.6	1.02	18	14.4	0.697	17	63.1	1.004	18	33.4	0.58	17	83.9	0.612
O60318	Germinal-center associated nuclear protein OS=Homo sapiens GN=MCM3AP PE=1 SV=2 - [GANP_HUMAN]	0.4939	6	18	100	300	1.006	12	14.9	0.853	12	12	1.612	12	15.1	0.935	12	24.6	1.544	12	53.7	1.533	12	89.7	1.182	12	28.5	1.159	11	52.1	1.259	11	11	1	12	10.6	0.928	12	30.1	1.708	12	33.5	0.861	12	15.8	1.927	12	34	1.843
O60885	Bromodomain-containing protein 4 OS=Homo sapiens GN=BRD4 PE=1 SV=2 - [BRD4_HUMAN]	0.4031	12	18	70	306	0.912	19	20.8	0.822	19	28.3	2.417	19	26.7	0.855	19	29.5	2.898	19	31.5	2.588	19	18.6	3.001	19	40.7	2.578	19	40.4	2.882	19	43.1	0.87	23	26.1	0.769	23	26.5	2.19	24	35.9	0.754	23	30	2.915	24	60.9	2.275
O75475	PC4 and SFRS1-interacting protein OS=Homo sapiens GN=PSIP1 PE=1 SV=1 - [PSIP1_HUMAN]	0.9434	6	18	87	808	0.775	36	44.6	0.723	33	37.1	2.428	36	58.5	0.878	32	27.2	2.916	36	59.7	2.279	35	51.2	2.503	36	46.5	2.58	35	40.3	2.361	36	56.9	0.848	35	35.7	0.876	32	29.3	2.976	37	91.4	0.843	33	36.7	3.421	37	122	2.629
O94804	Serine/threonine-protein kinase 10 OS=Homo sapiens GN=STK10 PE=1 SV=1 - [STK10_HUMAN]	0.6457	2	18	87	244	1.045	12	17.5	1.096	12	8.4	1.06	12	45.4	1.086	13	24.1	0.86	12	44.4	1.032	13	36.4	1.028	12	69.6	0.98	12	63.2	1.118	12	62.2	0.986	14	47.7	1.051	13	17	0.979	13	59	0.998	14	27	1.042	13	68.9	1.021
O95782-2	Isoform B of AP-2 complex subunit alpha-1 OS=Homo sapiens GN=AP2A1 - [AP2A1_HUMAN]	0.5906	6	18	58	207	1.159	15	8.4	0.982	15	8.4	0.791	15	43.6	1.08	15	20.3	0.791	14	43.4	0.886	15	43.2	0.773	14	91.7	0.817	15	94.9	0.771	14	59.5	1.107	15	13.6	0.991	15	17.6	0.956	15	24.6	1.092	15	15.2	0.976	15	40.1	1.038
P00492	Hypoxanthine-guanine phosphoribosyltransferase OS=Homo sapiens GN=HPRT1 PE=1 SV=2 - [HPRT_HUMAN]	0.8716	3	18	31	177	1.169	20	35.5	1.201	20	23.2	0.509	17	107.7	1.017	20	28.7	0.401	17	123.3	0.407	18	89.8	0.512	13	169.2	0.458	13	110.9	0.386	16	143.7	1.077	24	31.3	1.124	24	12	0.422	22	112.9	1.067	24	34.5	0.313	20	112.5	0.403
P12429	Annexin A3 OS=Homo sapiens GN=ANXA3 PE=1 SV=3 - [ANXA3_HUMAN]	0.7461	6	18	37	155	0.975	22	25.7	0.982	22	16.4	1.201	22	29.8	0.979	22	14.2	1.315	22	38.5	1.132	22	29.2	0.909	22	56.6	0.832	22	69.5	0.857	21	38.4	0.975	21	23	0.876	21	19.4	1.412	21	21.9	0.996	21	35.7	1.45	20	34.2	1.24
P12532	Creatine kinase U-type, mitochondrial OS=Homo sapiens GN=CKMT1A PE=1 SV=1 - [KCRU_HUMAN]	0.8441	24	18	44	394	1.052	34	24.3	1.067	34	19.1	0.987	34	53.7	1.076	34	23.9	0.836	32	131.8	0.831	32	110.2	0.91	30	130.7	0.672	33	140.8	0.724	30	152.3	1.064	36	29.9	1.002	36	13.5	0.868	36	59.3	1.012	36	24.3	0.585	34	113.4	0.721
P12814-3	Isoform 3 of Alpha-actinin-1 OS=Homo sapiens GN=ACTN1 - [ACTN1_HUMAN]	0.8239	24	18	85	559	1.07	19	10.7	1.11	19	15.2	0.591	19	47.1	1.073	19	11.7	0.55	18	61.8	0.556	19	48.6	0.493	17	136.7	0.492	17	67.3	0.42	19	61.7	1.071	20	15.5	1.072	20	6.2	0.65	20	70.4	1.034	20	7.9	0.685	20	43.4	0.586
P22695	Cytochrome b-c1 complex subunit 2, mitochondrial OS=Homo sapiens GN=UQCRC2 PE=1 SV=3 - [QCR2_HUMAN]	0.6976	7	18	36	330	0.961	27	14.2	0.965	27	17.5	0.804	27	29.5	1.007	27	18.8	0.581	26	83.6	0.719	27	70.7	0.569	26	85.8	0.599	25	61.7	0.526	26	87.5	1.002	31	13.8	0.941	30	13.4	0.764	30	46.3	1.001	31	13.8	0.749	29	59.5	0.661
P23193	Transcription elongation factor A protein 1 OS=Homo sapiens GN=TCEA1 PE=1 SV=2 - [TCEA1_HUMAN]	0.8007	8	18	46	233	0.947	19	20	0.917	19	14.2	1.502	19	58.2	0.95	19	27.3	1.499	19	75.8	1.317	19	55.8	1.186	19	109.3	0.97	19	152.5	1.003	19	113.5	0.95	26	19.2	1.015	26	12.6	1.431	26	41.1	0.992	26	20	1.465	26	54	1.285
P28074	Proteasome subunit beta type-5 OS=Homo sapiens GN=PSMB5 PE=1 SV=3 - [PSB5_HUMAN]	0.7224	4	18	24	197	0.976	29	11.2	1.042	29	9.2	0.745	30	39.8	0.98	30	12	0.789	29	46.9	0.778	30	46.7	0.745	28	55.7	0.907	28	68.5	0.817	28	62	0.951	27	18.5	0.993	27	10.5	0.634	27	57.3	0.985	27	10.2	0.804	25	81.2	0.677
P28290	Sperm-specific antigen 2 OS=Homo sapiens GN=SSFA2 PE=1 SV=3 - [SSFA2_HUMAN]	0.6783	10	18	110	371	1.004	15	16.8	0.916	15	8.9	1.296	15	19.9	0.946	15	31.1	1.133	14	27.6	1.191	14	20.9	1.093	13	48.2	0.92	13	27	1.091	13	68.2	1.009	13	7.5	0.956	13	10.9	1.01	13	44.7	1.021	13	7.7	1.121	12	49.8	0.977
P30040	Endoplasmic reticulum resident protein 29 OS=Homo sapiens GN=ERP29 PE=1 SV=4 - [ERP29_HUMAN]	0.8467	4	18	33	220	0.994	30	17.4	1.036	30	9.9	0.735	30	52.4	0.996	30	14.1	0.606	29	67.5	0.637	30	54	0.507	28	122.2	0.614	27	94.8	0.603	27	124.5	1.045	27	19.5	1.053	27	10.4	0.885	26	54.6	0.998	27	20.2	0.692	26	52.5	0.758
P30419	Glycylpeptide N-tetradecanoyltransferase 1 OS=Homo sapiens GN=NMT1 PE=1 SV=2 - [NMT1_HUMAN]	0.6633	23	18	37	203	1.049	21	28.4	1.101	21	13.4	0.73	21	36.4	0.95	21	18.3	0.726	17	37.7	0.719	17	41.6	0.704	17	46	0.615	16	48.5	0.607	17	35.7	1.052	17	14.9	1.085	18	15.4	0.749	18	56.1	1.038	17	10	0.678	17	39.9	0.657
P35527	Keratin, type I cytoskeletal 9 OS=Homo sapiens GN=KRT9 PE=1 SV=3 - [K1C9_HUMAN]	0.7833	2	18	55	260	0.984	22	19.9	0.988	22	9.2	1.296	22	57.9	0.747	22	13.2	1.39	22	61.5	1.086	22	47.5	1.143	22	110.5	1.504	22	117.1	1.399	22	71.3	1.071	21	14.3	0.985	21	14.7	1.59	21	52.3	0.871	21	33.8	1.432	21	82.5	1.307
P36952	Serpin B5 OS=Homo sapiens GN=SERPINB5 PE=1 SV=2 - [SPB5_HUMAN]	0.9467	4	18	41	265	1.06	24	14.5	1.125	24	12.5	0.506	23	35	1.034	24	15.4	0.477	22	58.7	0.518	23	40.4	0.4	22	46.9	0.35	21	44.2	0.38	23	49.8	1.067	27	20.9	1.137	27	12.8	0.634	27	28.6	1.069	27	17.4	0.521	25	35.1	0.542
P46778	60S ribosomal protein L21 OS=Homo sapiens GN=RPL21 PE=1 SV=2 - [RL21_HUMAN]	0.9563	8	18	35	421	1.067	60	19.2	1.136	60	12.5	0.918	60	52.4	1.089	60	19.5	1.038	60	58.8	1.049	60	57.2	1.08	59	58.9	1.163	59	62.6	1.068	60	62.6	1.063	56	21.8	1.071	56	16.3	0.949	54	64.4	1.046	56	22.8	0.876	55	77.7	0.985
P46783	40S ribosomal protein S10 OS=Homo sapiens GN=RPS10 PE=1 SV=1 - [RS10_HUMAN]	0.8606	5	18	28	444	0.91	70	18.9	1.04	70	14.3	0.757	70	87.1	0.969	70	26.3	0.714	69	75.8	0.769	69	59.6	0.651	64	116.6	0.683	63	82.3	0.692	64	108.2	0.954	67	25.3	1.057	67	12.4	0.865	65	77	1.002	67	20.8	0.841	64	114.4	0.882
P48163	NADP-dependent malic enzyme OS=Homo sapiens GN=ME1 PE=1 SV=1 - [MAOX_HUMAN]	0.5874	8	18	40	135	0.979	13	13.6	1.189	13	25.3	0.574	13	48.6	0.978	13	22.8	0.585	12	63.9	0.664	11	40	0.472	11	60.8	0.462	10	156.5	0.494	10	51	1.017	16	15.1	1.172	16	16.2	0.498	15	127.8	1.03	16	15.9	0.404	13	238.7	0.695
P55769	NHP2-like protein 1 OS=Homo sapiens GN=SNU13 PE=1 SV=3 - [NH2L1_HUMAN]	0.7813	2	18	21	377	0.872	55	34.5	0.838	55	34.4	2.149	55	64.9	0.807	55	34.6	2.642	55	57.2	2.283	55	61.4	4.806	55	77.9	4.279	55	97	4.589	55	73	0.9	58	34.1	0.804	58	40	2.155	58	54	0.772	58	33.9	2.531	58	64.1	2.208
Q05048	Cleavage stimulation factor subunit 1 OS=Homo sapiens GN=CSTF1 PE=1 SV=1 - [CSTF1_HUMAN]	0.8794	4	18	41	200	1.055	23	27.3	0.934	23	26	1.904	23	20.5	0.988	23	20	2.042	23	25.3	1.845	23	28.6	2.161	23	25.6	2.081	23	37.6	1.808	23	44.3	0.969	29	20.3	0.959	29	22.9	1.94	29	43.5	0.993	29	14.9	2.013	29	37.5	1.646
Q13242	Serine/arginine-rich splicing factor 9 OS=Homo sapiens GN=SRSF9 PE=1 SV=1 - [SRSF9_HUMAN]	0.9276	5	18	39	316	0.807	39	36.2	0.835	39	33.5	1.961	39	52.8	0.855	38	25.2	2.051	39	51.8	1.826	39	46	2.346	39	68.5	2.086	38	92.5	2.241	39	63.5	0.822	37	34.6	0.852	36	30.5	1.816	38	54	0.757	38	38.7	2.058	38	64.3	1.859
Q13409-3	Isoform 2C of Cytoplasmic dynein 1 intermediate chain 2 OS=Homo sapiens GN=DYNC1I2 - [DC1I2_HUMAN]	0.6373	36	18	43	176	1.023	19	28.2	1.16	18	13.2	0.763	17	62.5	1.102	19	22.8	0.624	17	135.6	0.749	18	85.3	0.648	15	131.3	0.748	17	98.6	0.733	15	90.5	1.023	16	26.2	1.101	16	16.5	0.751	16	55	1.049	16	21.9	0.572	16	94.5	0.678
Q13427	Peptidyl-prolyl cis-trans isomerase G OS=Homo sapiens GN=PPIG PE=1 SV=2 - [PPIG_HUMAN]	0.6671	10	18	76	319	0.822	21	27	0.682	21	25.8	2.868	21	17.7	0.691	21	30.1	2.882	21	27.7	2.381	21	35	2.49	21	47	2.404	21	46.9	2.529	21	39.5	0.798	21	27.4	0.79	22	35.5	2.774	22	38.7	0.808	22	29.3	2.985	22	57.5	2.744
Q13442	28 kDa heat- and acid-stable phosphoprotein OS=Homo sapiens GN=PDAP1 PE=1 SV=1 - [HAP28_HUMAN]	0.9227	2	18	35	179	0.991	22	25.5	1.104	22	10.9	0.85	22	38	1.086	22	22.4	0.789	22	41.2	0.865	22	39.3	0.797	22	41.1	0.724	22	60	0.7	22	76.5	1.014	26	21.2	1.101	26	12.6	0.79	26	29.3	0.993	26	18.9	0.767	26	30.8	0.786
Q13618	Cullin-3 OS=Homo sapiens GN=CUL3 PE=1 SV=2 - [CUL3_HUMAN]	0.8138	9	18	80	256	0.964	19	25	1.084	19	22	0.818	18	31	1.004	18	27.9	0.774	17	45.5	0.855	18	59.4	0.743	17	26.3	0.693	17	53	0.714	18	63.8	0.976	17	32.5	0.992	17	19.4	0.717	17	33.9	1.015	17	28.5	0.649	16	42.9	0.833
Q13769	THO complex subunit 5 homolog OS=Homo sapiens GN=THOC5 PE=1 SV=2 - [THOC5_HUMAN]	0.6501	9	18	47	141	0.782	12	6	0.764	12	27.6	1.512	12	19	0.784	12	29.3	1.767	12	25.5	1.612	12	14.8	1.616	12	32.7	1.355	12	54.4	1.245	12	49.1	0.785	11	31.5	0.764	11	24.8	1.744	11	26	0.77	11	20.3	1.946	11	22.7	1.875
Q15042	Rab3 GTPase-activating protein catalytic subunit OS=Homo sapiens GN=RAB3GAP1 PE=1 SV=3 - [RB3GP_HUMAN]	0.6065	4	18	59	191	0.95	14	11	0.956	14	15	0.654	12	40.7	1.036	14	19.2	0.644	12	51.9	0.735	12	25.6	0.702	12	62.2	0.817	12	70.4	0.556	12	71.9	1.101	16	15	1.083	16	13.3	0.588	16	40.6	1.021	16	12.3	0.703	15	47.8	0.654
Q15428	Splicing factor 3A subunit 2 OS=Homo sapiens GN=SF3A2 PE=1 SV=2 - [SF3A2_HUMAN]	0.4655	3	18	32	179	0.89	19	23.3	0.857	19	31.1	1.866	19	35.7	0.88	19	22.5	1.984	19	52.8	1.809	19	87.9	1.775	19	57	1.24	19	77	1.514	19	67.1	0.889	21	27.4	0.838	21	46.7	1.878	21	89.4	0.835	21	34.3	2.008	21	92.3	1.427
Q15910-2	Isoform 2 of Histone-lysine N-methyltransferase EZH2 OS=Homo sapiens GN=EZH2 - [EZH2_HUMAN]	0.7297	20	18	65	231	0.833	15	23.3	0.798	15	19.3	2.08	16	44	0.795	16	27.4	2.396	16	41.7	2.18	16	29.2	2.108	15	34.4	2.163	16	33	2.148	15	28	0.804	17	34.2	0.741	17	34.6	1.946	18	45.5	0.763	18	33.5	2.341	18	46.7	2.413
Q32P28	Prolyl 3-hydroxylase 1 OS=Homo sapiens GN=P3H1 PE=1 SV=2 - [P3H1_HUMAN]	0.5421	9	18	38	124	0.94	11	7.3	0.94	11	9.1	1.078	11	25.8	1	11	14.8	0.934	11	19.8	1.137	11	21.9	1.123	11	60.6	1.06	11	21.9	0.956	11	62.9	0.945	17	17.6	0.964	17	16.2	0.958	17	23.6	0.929	17	15.6	0.984	17	47.9	0.991
Q4LE39	AT-rich interactive domain-containing protein 4B OS=Homo sapiens GN=ARID4B PE=1 SV=2 - [ARI4B_HUMAN]	0.6113	11	18	99	296	0.845	13	29.5	0.748	13	22.8	1.79	13	56.5	0.882	12	19.9	1.779	13	52	1.773	13	47.2	1.653	13	51.6	1.91	13	80.8	1.612	13	49.1	0.948	12	29.3	0.936	12	15.2	1.904	12	63.8	0.965	11	19.4	2.087	12	69.9	1.642
Q5M775	Cytospin-B OS=Homo sapiens GN=SPECC1 PE=1 SV=1 - [CYTSB_HUMAN]	0.7322	16	18	85	302	1.058	13	13.2	1.089	13	11	0.684	13	45.4	1.096	13	12.8	0.658	12	60.8	0.666	12	62.6	0.709	11	54.2	0.711	10	55.2	0.735	9	37.5	1.031	12	34	1.133	12	11.5	0.724	11	47.7	1.062	12	13.6	0.731	11	48.4	0.831
Q5T6F2	Ubiquitin-associated protein 2 OS=Homo sapiens GN=UBAP2 PE=1 SV=1 - [UBAP2_HUMAN]	0.4084	16	18	52	260	1.073	21	15	1.119	21	14.1	0.8	21	43.1	1.034	21	16.8	0.675	21	55.8	0.76	21	42.6	0.807	21	95.8	0.786	20	67.5	0.904	20	44.5	1.049	20	16.1	1.162	20	10.7	0.817	20	52.7	1.117	20	13.2	0.838	20	66.6	0.796
Q5T9B7	Adenylate kinase isoenzyme 1 OS=Homo sapiens GN=AK1 PE=1 SV=1 - [Q5T9B7_HUMAN]	0.8429	6	18	30	139	1.036	15	14.2	1.121	15	7.1	0.695	14	43.8	1.089	15	12.3	0.719	14	41.4	0.821	15	25.5	0.723	14	44.6	0.771	15	41.6	0.78	13	62	1	14	12.2	1.072	14	9.1	0.634	14	43.5	1.044	14	6.9	0.776	14	65.3	0.733
Q5VWN6	Protein FAM208B OS=Homo sapiens GN=FAM208B PE=1 SV=1 - [F208B_HUMAN]	0.5284	4	18	136	365	0.83	16	21	0.838	16	17.9	1.6	15	130.7	0.904	16	20.4	1.578	16	98.2	1.798	16	150.2	1.179	15	228.5	1.028	12	80.9	1.214	13	130.2	0.789	11	36.9	0.892	11	23.7	2.829	11	68.9	0.893	11	17	3.022	10	54.6	1.911
Q6PGP7	Tetratricopeptide repeat protein 37 OS=Homo sapiens GN=TTC37 PE=1 SV=1 - [TTC37_HUMAN]	0.6042	3	18	97	260	1.074	12	8.8	0.992	12	12.3	0.733	12	19.4	1.064	12	14.1	0.741	12	86	0.819	12	53.3	0.872	11	43.7	0.793	11	83.9	0.793	12	46.2	1.159	12	13.3	1.052	12	10.4	0.846	12	32	1.076	12	11.6	0.909	12	51.7	0.918
Q6XQN6	Nicotinate phosphoribosyltransferase OS=Homo sapiens GN=NAPRT PE=1 SV=2 - [PNCB_HUMAN]	0.6673	9	18	25	169	1.131	20	12.6	1.048	19	10.3	0.744	18	60.5	1.104	19	15.6	0.762	19	55.5	0.696	19	34.5	0.671	18	59.3	0.796	18	75.9	0.842	19	59.7	1.076	17	21.6	1.075	17	24.2	0.765	16	72.6	1.012	17	18.2	0.799	15	44.7	0.64
Q7Z5K2-3	Isoform 3 of Wings apart-like protein homolog OS=Homo sapiens GN=WAPL - [WAPL_HUMAN]	0.6047	6	18	85	217	0.857	14	25.3	0.843	14	17.9	1.671	14	57.2	0.77	14	29.1	2.208	13	94.9	1.713	13	54.6	2.127	12	60.6	1.634	13	27.2	1.794	12	34.1	0.92	15	22.1	0.939	15	15.4	1.825	15	59.3	0.886	15	21.3	1.992	15	73.4	1.758
Q86UE4	Protein LYRIC OS=Homo sapiens GN=MTDH PE=1 SV=2 - [LYRIC_HUMAN]	0.6753	5	18	47	260	1.005	19	18.9	0.947	19	13.6	0.645	18	54	1.02	19	9.4	0.695	19	39.8	0.758	19	30.2	0.601	18	51.4	0.467	17	46	0.599	18	92.2	1.011	20	18.7	0.881	20	22.7	0.914	20	83.3	0.998	20	18.2	0.838	19	71.7	0.853
Q86XL3	Ankyrin repeat and LEM domain-containing protein 2 OS=Homo sapiens GN=ANKLE2 PE=1 SV=4 - [ANKL2_HUMAN]	0.71	4	18	80	194	1.015	12	14.9	1.07	12	7.3	0.893	12	55.8	1.002	12	11.7	0.96	12	51.9	1.084	12	39	0.892	12	72.6	1.13	12	117.1	1.05	12	111.3	1.085	8	6.7	1.112	8	13.8	1.082	8	39	1.072	8	32.4	1.051	8	60	1.116
Q8NFW8	N-acylneuraminate cytidylyltransferase OS=Homo sapiens GN=CMAS PE=1 SV=2 - [NEUA_HUMAN]	0.7442	5	18	39	139	0.898	17	21.9	0.888	17	25	1.611	17	36.7	0.885	17	24.9	1.785	17	41.7	1.659	17	49.5	1.801	16	41.8	2.167	17	73.9	1.731	17	42.2	0.85	17	20.5	0.89	17	10.6	1.311	17	38.7	0.858	17	19.6	1.483	17	38.1	1.55
Q92766-2	Isoform 2 of Ras-responsive element-binding protein 1 OS=Homo sapiens GN=RREB1 - [RREB1_HUMAN]	0.5316	10	18	96	278	0.933	12	33	0.783	11	25.2	2.724	12	29.5	0.89	12	31.4	2.637	12	57	2.483	12	62.5	2.159	11	112.8	2.12	11	35.3	1.989	10	84.6	0.863	16	51.2	0.755	15	42	3.01	16	56.5	0.82	15	41.6	2.849	15	71.4	2.896
Q96BP3	Peptidylprolyl isomerase domain and WD repeat-containing protein 1 OS=Homo sapiens GN=PPWD1 PE=1 SV=1 - [PPWD1_HUMAN]	0.6904	11	18	59	247	0.866	16	18.8	0.848	16	16.7	1.642	16	22	0.824	16	24.6	1.738	15	25	1.664	15	22.7	1.477	15	23.4	1.537	15	19	1.318	14	27.5	0.796	16	18.4	0.794	16	15.9	1.615	15	34.2	0.86	15	27.4	1.787	16	31.8	1.669
Q96EE3-1	Isoform B of Nucleoporin SEH1 OS=Homo sapiens GN=SEH1L - [SEH1_HUMAN]	0.7031	6	18	30	228	0.766	27	34.5	0.775	27	27.6	2.288	26	33.7	0.862	27	32.8	2.651	27	45.5	2.544	27	34.5	2.123	27	41.7	2.107	26	33.6	1.867	26	63.5	0.915	24	19.6	0.817	24	32.9	2.27	24	45	0.803	24	40.3	2.901	24	48.4	2.256
Q96L73	Histone-lysine N-methyltransferase, H3 lysine-36 and H4 lysine-20 specific OS=Homo sapiens GN=NSD1 PE=1 SV=1 - [NSD1_HUMAN]	0.5775	12	18	170	434	0.918	12	19.3	0.884	12	29.1	2.145	12	44	0.815	11	29.8	2.304	12	43.2	2.078	12	49.3	1.967	12	42	1.978	11	48.9	2.34	11	20.2	0.885	13	35.3	0.82	12	30	2.507	13	26.8	0.929	12	34	2.932	13	36.4	2.439
Q96L91-2	Isoform 2 of E1A-binding protein p400 OS=Homo sapiens GN=EP400 - [EP400_HUMAN]	0.4569	21	18	144	400	0.748	14	27.2	0.816	14	24.9	1.643	14	52.6	0.751	13	33.5	2.372	14	45.1	2.048	14	64.4	2.06	13	47.9	1.698	13	39.9	1.753	13	25.9	0.794	14	10.6	0.854	13	8.1	1.946	14	24.2	0.827	14	12.6	2.439	14	34.2	2.322
Q99714	3-hydroxyacyl-CoA dehydrogenase type-2 OS=Homo sapiens GN=HSD17B10 PE=1 SV=3 - [HCD2_HUMAN]	0.9808	4	18	23	437	0.973	56	16	0.969	56	14.9	0.678	56	37.9	1.012	56	15.3	0.537	55	80.2	0.579	55	67.2	0.494	49	133	0.542	50	114.2	0.499	51	128	1.017	54	17.3	1.031	55	14.1	0.818	52	49.7	1.033	55	14.1	0.613	52	109.4	0.696
Q9BTE3-2	Isoform 2 of Mini-chromosome maintenance complex-binding protein OS=Homo sapiens GN=MCMBP - [MCMBP_HUMAN]	0.6469	4	18	46	203	1.066	16	15.1	1.073	16	14.1	0.851	16	30.7	1.056	16	11.4	0.899	16	64.5	0.862	16	69.2	0.924	15	61.8	1.047	16	45.2	0.852	16	55.2	1.102	17	16.4	1.094	17	20.3	0.932	17	47.7	1.005	17	18.7	0.946	17	40	0.855
Q9BVQ7	Spermatogenesis-associated protein 5-like protein 1 OS=Homo sapiens GN=SPATA5L1 PE=1 SV=2 - [SPA5L_HUMAN]	0.5989	4	18	44	128	1.036	11	24	1.076	11	15.4	0.919	11	52.2	1.08	11	10.4	1.212	10	41.6	0.995	10	64.5	0.661	9	122	0.866	9	78.2	0.918	9	61.6	1.011	13	20.1	1.098	13	32.7	1.356	11	47.2	0.972	13	33.3	1.413	10	34.4	1.264
Q9H0B6	Kinesin light chain 2 OS=Homo sapiens GN=KLC2 PE=1 SV=1 - [KLC2_HUMAN]	0.7058	10	18	56	208	1.045	17	14.4	1.169	17	16.2	0.85	17	36.2	1.126	17	17.5	0.766	16	48.4	0.913	17	38.4	0.839	17	43.9	0.814	16	57.1	0.807	17	62.6	1.056	16	22.8	1.02	16	15.5	0.946	16	15.9	1.108	16	16.8	0.9	16	35.3	0.822
Q9H2U1	ATP-dependent RNA helicase DHX36 OS=Homo sapiens GN=DHX36 PE=1 SV=2 - [DHX36_HUMAN]	0.7669	8	18	87	278	0.993	17	13.3	0.948	17	7.3	0.982	17	41.1	0.918	17	16.9	0.881	17	54.5	0.904	17	17.9	0.71	17	33.3	0.752	17	49.5	0.775	17	61.3	1.008	19	15.7	0.959	19	16.7	1.136	19	69.5	0.982	19	21.3	1.052	18	42.9	0.99
Q9H7Z7	Prostaglandin E synthase 2 OS=Homo sapiens GN=PTGES2 PE=1 SV=1 - [PGES2_HUMAN]	0.7798	5	18	30	126	0.913	14	18.2	0.929	14	12.6	0.724	13	24.6	0.873	14	16.7	0.762	13	30	0.725	13	51.5	0.861	13	33.7	0.747	13	47.3	0.919	13	59.3	0.88	17	23.6	0.975	17	15.1	0.747	17	37.4	0.955	17	19.5	0.747	16	43.8	0.704
Q9NQZ2	Something about silencing protein 10 OS=Homo sapiens GN=UTP3 PE=1 SV=1 - [SAS10_HUMAN]	0.6472	10	18	44	203	0.672	20	35.9	0.609	20	55.3	2.13	21	24.5	0.676	20	46.7	2.553	21	55.1	2.344	21	42.9	4.448	21	70.7	3.005	21	96.5	3.445	21	93.2	0.78	23	28.6	0.778	22	24.8	2.085	26	50.6	0.765	23	46.7	2.863	27	21.6	2.39
Q9NX63	MICOS complex subunit MIC19 OS=Homo sapiens GN=CHCHD3 PE=1 SV=1 - [MIC19_HUMAN]	0.9075	4	18	33	167	0.942	20	19.5	1.026	20	7.8	0.8	20	35.8	0.967	20	15.3	0.699	20	40.6	0.684	20	48.4	0.889	20	75.2	0.988	20	66.9	1.019	20	76.2	0.978	22	13.3	1.029	22	10.2	0.924	22	36.2	0.968	22	16.2	0.882	22	54.2	0.791
Q9NYL9	Tropomodulin-3 OS=Homo sapiens GN=TMOD3 PE=1 SV=1 - [TMOD3_HUMAN]	0.7585	11	18	30	263	1.098	27	21.5	1.146	27	9.4	0.778	24	54.5	1.21	27	23.6	0.684	21	58.7	0.81	24	78.8	0.89	22	79.3	0.842	21	89.5	0.924	19	43.7	1.139	28	20.3	1.179	28	18.3	0.707	27	62.9	1.173	28	15	0.712	25	81.3	0.736
Q9UHB7	AF4/FMR2 family member 4 OS=Homo sapiens GN=AFF4 PE=1 SV=1 - [AFF4_HUMAN]	0.8005	6	18	114	363	0.845	12	43	0.631	12	61.4	3.316	12	57.6	0.707	12	63.1	3.615	12	61.7	3.33	12	61.9	3.24	12	71.8	3.91	12	56.7	3.27	11	81	0.833	10	25	0.831	10	31	1.895	11	100.6	0.824	10	31.3	2.26	11	94.5	2.007
Q9UHR4	Brain-specific angiogenesis inhibitor 1-associated protein 2-like protein 1 OS=Homo sapiens GN=BAIAP2L1 PE=1 SV=2 - [BI2L1_HUMAN]	0.7945	1	18	49	169	1.061	15	17.2	1.047	15	19.3	1.108	15	51.1	1.065	15	18.4	0.872	15	45.6	0.866	15	47.1	0.799	15	69.8	0.743	15	117.8	0.974	15	67.5	1.032	17	23.3	1.137	17	20.4	1.112	17	44	1.013	17	15.9	1.149	17	73.3	1.001
Q9UJZ1	Stomatin-like protein 2, mitochondrial OS=Homo sapiens GN=STOML2 PE=1 SV=1 - [STML2_HUMAN]	0.8511	5	18	39	227	1.045	20	13.6	1.023	20	12	0.94	20	24.8	1.032	20	11.2	0.784	20	60.2	0.76	20	41.1	0.819	18	45.6	0.804	18	81.4	0.69	19	46.1	0.988	25	14.3	0.961	25	12	0.928	24	41.1	0.984	25	13.1	0.786	24	65.4	0.794
Q9Y2Z4	Tyrosine--tRNA ligase, mitochondrial OS=Homo sapiens GN=YARS2 PE=1 SV=2 - [SYYM_HUMAN]	0.652	2	18	35	160	1.144	16	25.2	0.986	16	10.9	0.748	16	20.6	1.071	16	21.7	0.718	15	51	0.573	16	98.8	0.581	16	78.9	0.616	15	95.2	0.59	16	69.6	1.107	14	13.5	1.021	14	20.2	0.766	14	49.2	1.131	14	12.8	0.793	13	96	0.892
P40763-3	Isoform 3 of Signal transducer and activator of transcription 3 OS=Homo sapiens GN=STAT3 - [STAT3_HUMAN]	0.7161	9	18	60	297	1.061	19	12.3	1.065	19	9.8	0.696	18	32.8	1.095	19	18.9	0.645	19	49.4	0.679	18	33.6	0.633	17	42	0.563	19	72.6	0.56	18	56.5	1.115	19	16.2	1.059	19	11.5	0.687	19	50.9	1.061	19	9.7	0.677	17	52.7	0.752
Q96CP5	PMPCB protein (Fragment) OS=Homo sapiens GN=PMPCB PE=2 SV=2 - [Q96CP5_HUMAN]	0.7292	11	18	46	209	1.03	20	12.9	1.009	20	10.2	0.865	18	64.8	0.995	20	18.5	0.764	19	103	0.727	17	80.5	0.698	17	79.3	0.693	16	79.3	0.665	15	98.7	1.068	23	16.9	1.051	22	11.2	0.861	21	31.2	1.039	22	14.7	0.697	22	48.5	0.714
A8K4W5	cDNA FLJ76813, highly similar to Homo sapiens acetyl-Coenzyme A acetyltransferase 2 (acetoacetyl Coenzyme A thiolase), mRNA OS=Homo sapiens PE=2 SV=1 - [A8K4W5_HUMAN]	0.8665	4	18	30	170	1.028	19	20.5	1.092	19	21	0.513	17	72.7	1.044	19	14.4	0.77	15	103.4	0.682	14	39.4	0.609	16	85.3	0.56	14	41.1	0.687	14	59.6	1.073	21	16.4	1.07	21	21.1	0.85	16	47.7	1.047	21	14.1	0.715	15	67.2	0.74
A8K9T8	cDNA FLJ76106, highly similar to Homo sapiens neurolysin (metallopeptidase M3 family) (NLN), mRNA OS=Homo sapiens PE=2 SV=1 - [A8K9T8_HUMAN]	0.5781	9	18	53	177	0.945	16	22.6	1.115	16	11	0.598	16	57.5	1.008	16	18.8	0.575	15	92.5	0.626	15	74.5	0.602	15	168.7	0.681	15	122.1	0.725	15	107.6	0.921	14	20.5	1.003	14	10.9	0.576	14	78.4	0.963	14	16.4	0.503	14	141.9	0.624
B3KW50	cDNA FLJ42130 fis, clone TESTI2014716, highly similar to G-rich sequence factor 1 OS=Homo sapiens PE=2 SV=1 - [B3KW50_HUMAN]	0.8344	11	18	35	200	0.988	23	16.2	1.055	23	11.3	0.763	22	45	0.989	23	22.6	0.745	21	52	0.747	22	32.5	0.615	19	80.6	0.647	20	43.3	0.657	18	79	0.966	24	9.8	1.02	24	14.1	0.726	22	24.8	0.948	24	15.1	0.612	22	67.1	0.634
A8K4T6	cDNA FLJ76282, highly similar to Homo sapiens proteasome (prosome, macropain) 26S subunit, non-ATPase, 5 (PSMD5), mRNA OS=Homo sapiens PE=2 SV=1 - [A8K4T6_HUMAN]	0.7619	4	18	32	162	0.98	22	30.6	1.034	23	23.6	0.679	20	86.6	0.989	23	20.8	0.658	20	82.1	0.713	20	81.4	0.733	19	81.4	0.558	18	95.9	0.594	21	137.8	1.001	23	15.5	1.03	22	23.8	0.656	19	69	0.968	22	22.3	0.693	20	87.3	0.69
A5YM53	ITGAV protein OS=Homo sapiens GN=ITGAV PE=2 SV=1 - [A5YM53_HUMAN]	0.6307	6	18	67	226	1.047	17	6.1	0.972	17	22.5	0.777	17	21.1	1.027	17	14.5	0.67	17	86.3	0.706	17	61.7	0.528	16	69.4	0.516	15	50.9	0.428	14	72.1	1.034	17	10.2	1.105	17	15.4	0.783	16	10.1	1.084	16	7.7	0.685	16	39.2	0.724
Q53GX4	Peptidylprolyl isomerase (Fragment) OS=Homo sapiens PE=2 SV=1 - [Q53GX4_HUMAN]	0.7659	7	18	49	162	0.961	13	11.9	1.089	13	10	0.551	13	40.6	0.953	13	14.2	0.586	13	49	0.551	13	33.9	0.66	12	62.1	0.386	12	97.1	0.394	13	96.2	1.021	17	18.6	1.125	17	11.9	0.659	17	59.4	1.058	17	13.2	0.615	17	61.3	0.672
Q86YB2	DEAH (Asp-Glu-Ala-His) box polypeptide 8 OS=Homo sapiens GN=DHX8 PE=2 SV=2 - [Q86YB2_HUMAN]	0.6057	8	18	88	315	0.868	16	30.6	0.854	16	36.7	1.332	16	36	0.886	15	26.3	1.579	16	37.5	1.548	16	24.3	1.346	16	63	1.148	16	56.8	1.138	13	55.5	0.876	16	17.5	0.844	16	23.1	1.506	15	36.9	0.93	15	27.2	1.62	15	31.4	1.516
H6QX63	Hepatocellular carcinoma related protein 2 OS=Homo sapiens PE=2 SV=1 - [H6QX63_HUMAN]	0.8918	7	18	45	219	0.863	23	20.3	0.807	23	22.6	2.628	23	57.6	0.826	22	23.2	3.033	23	65.6	2.246	23	46.6	3.446	23	59.7	3.299	23	69.2	3.776	23	65.9	0.981	22	29.1	0.86	21	35	2.528	22	115.2	0.844	22	33.1	3.25	22	88	2.922
A8K2S1	Phospholipase A2 OS=Homo sapiens PE=2 SV=1 - [A8K2S1_HUMAN]	0.5234	5	18	37	181	1.055	24	15.4	1.008	25	8.5	0.762	24	28.9	1.012	24	15.4	0.855	24	44.3	0.84	24	31.4	0.875	22	44.3	0.99	22	63.4	0.874	22	46.8	0.967	22	24.3	1.011	22	13.3	0.78	21	29	1.022	22	12.2	0.807	19	34	1.001
A8K9X5	cDNA FLJ76472, highly similar to Homo sapiens Fas (TNFRSF6) associated factor 1 (FAF1), transcript variant 1, mRNA OS=Homo sapiens PE=2 SV=1 - [A8K9X5_HUMAN]	0.6462	6	18	60	180	0.973	13	23	1.106	12	17.4	0.519	11	103.8	0.968	13	18.4	0.548	11	124.9	0.761	12	72.8	0.485	10	165.3	0.576	10	128.9	0.772	9	46.7	1.094	11	8.9	1.154	11	4.5	0.654	11	30.7	1.084	11	21.1	0.69	9	79.4	0.703
A8K2U2	cDNA FLJ75392, highly similar to Homo sapiens hexokinase II (HKII) mRNA OS=Homo sapiens PE=2 SV=1 - [A8K2U2_HUMAN]	0.7099	7	18	64	162	0.954	13	13.6	0.956	13	9.9	0.798	13	58	1.033	13	10.2	0.787	13	62	0.772	13	36.8	0.511	13	46.5	0.568	13	73.5	0.577	13	51.2	1.097	16	26.2	0.973	16	15.6	0.858	16	48.2	1.067	16	18.4	0.915	16	67.3	0.845
M0QYH2	Bifunctional polynucleotide phosphatase/kinase OS=Homo sapiens GN=PNKP PE=1 SV=1 - [M0QYH2_HUMAN]	0.8551	10	18	43	167	0.907	18	27.8	0.883	18	23.4	2.507	18	53.7	0.895	18	23.1	2.425	18	43.3	2.091	18	45.6	2.181	17	66.4	2.503	17	63.9	2.051	18	28.1	0.883	19	20.8	0.819	19	29.1	2.058	19	53.4	0.859	19	27	2.22	19	67.7	1.724
X6RAL5	Histone deacetylase complex subunit SAP18 OS=Homo sapiens GN=SAP18 PE=1 SV=1 - [X6RAL5_HUMAN]	0.9302	5	18	30	259	0.859	30	26.9	0.776	30	27	1.966	30	45.1	0.855	30	30.3	2.035	30	56.5	1.966	30	49	1.654	30	56.1	1.717	30	64.9	1.769	30	59.9	0.804	34	22.7	0.78	34	25.4	2.197	34	45.3	0.831	34	26.3	2.548	34	49.9	2.296
A0A087WWF6	DNA polymerase delta subunit 2 OS=Homo sapiens GN=POLD2 PE=1 SV=1 - [A0A087WWF6_HUMAN]	0.5952	9	18	34	145	1.039	18	28.6	1.104	17	14.3	0.808	16	35	0.994	18	22.3	0.784	15	58.3	0.782	16	39.6	0.954	16	53.5	0.936	15	52.3	0.86	15	55.2	1.112	14	16.2	1.05	14	20.3	0.908	13	30.4	1.151	14	29.1	0.819	12	34.1	0.831
A0A024QZJ7	Coiled-coil domain containing 6, isoform CRA_a OS=Homo sapiens GN=CCDC6 PE=4 SV=1 - [A0A024QZJ7_HUMAN]	0.7574	5	18	50	175	1.081	17	11.7	1.162	17	11.4	0.594	17	35	1.065	17	12	0.487	17	66.7	0.621	17	43.7	0.537	17	66.1	0.609	17	35	0.592	17	55	1.055	14	14.8	1.057	14	8.9	0.718	14	45.1	1.092	14	15.8	0.547	14	33.9	0.607
A0AVT1	Ubiquitin-like modifier-activating enzyme 6 OS=Homo sapiens GN=UBA6 PE=1 SV=1 - [UBA6_HUMAN]	0.442	6	17	43	171	1.02	17	19.8	1.153	17	16.8	0.757	17	57.9	0.939	17	16.6	0.949	15	51.1	0.757	16	63.5	0.768	14	139.7	0.784	14	156.8	0.793	14	153.3	1.018	9	16.2	1.117	9	18.9	0.594	8	60.1	1.004	9	9.7	0.724	6	62.7	0.876
Q12872-2	Isoform 2 of Splicing factor, suppressor of white-apricot homolog OS=Homo sapiens GN=SFSWAP - [SFSWA_HUMAN]	0.5424	8	17	67	222	0.832	15	34.6	0.904	14	22.1	2.023	15	28.7	0.967	13	20.1	1.945	15	20.9	1.95	15	26.6	1.894	15	37.4	1.859	15	37.3	1.821	15	45.9	0.758	14	25.8	0.759	14	28.9	1.998	15	35.1	0.736	15	24.2	2.556	15	54.2	1.917
H0YDU8	Serine/threonine-protein phosphatase (Fragment) OS=Homo sapiens GN=PPP5C PE=1 SV=1 - [H0YDU8_HUMAN]	0.6515	13	17	43	188	1.038	20	12.3	1.128	20	8.8	0.562	20	36.2	1.093	20	11	0.477	20	67.9	0.51	20	38.2	0.429	19	94.6	0.459	20	125.7	0.471	18	67	1.171	20	24	1.217	20	17.5	0.791	19	61.8	1.11	20	13.8	0.663	19	69.8	0.793
O43463	Histone-lysine N-methyltransferase SUV39H1 OS=Homo sapiens GN=SUV39H1 PE=1 SV=1 - [SUV91_HUMAN]	0.7767	4	17	45	168	0.908	15	19.9	0.903	15	9.5	1.405	15	54.6	0.983	15	20.7	1.717	15	86.5	1.475	15	58.8	2.298	15	75.4	2.232	15	49.4	2.475	15	55.8	0.88	18	26.8	0.97	17	12.9	1.644	18	63.5	0.994	18	18.3	1.68	18	81.9	1.865
O60763	General vesicular transport factor p115 OS=Homo sapiens GN=USO1 PE=1 SV=2 - [USO1_HUMAN]	0.5977	2	17	59	226	1.018	17	26.7	1.028	17	12.2	0.645	17	59	1.05	17	16.3	0.548	15	92.2	0.7	15	54.4	0.596	15	150.4	0.53	15	135.8	0.49	14	127.8	1.091	19	22.2	1.086	19	15.1	0.589	17	70	1.131	19	15.8	0.47	16	91.6	0.589
O75179-2	Isoform 2 of Ankyrin repeat domain-containing protein 17 OS=Homo sapiens GN=ANKRD17 - [ANR17_HUMAN]	0.3935	31	17	108	406	1.029	11	19.3	1.16	11	24	0.767	11	61	0.826	11	14	0.666	11	37.3	0.641	11	60	0.659	11	43.1	0.676	11	54.9	0.725	11	96.4	1.026	14	11.9	1.068	14	7.5	0.685	14	67.1	0.989	14	15.2	0.712	14	128.2	0.695
O95816	BAG family molecular chaperone regulator 2 OS=Homo sapiens GN=BAG2 PE=1 SV=1 - [BAG2_HUMAN]	0.981	4	17	33	266	1.093	29	17.2	1.102	29	13.3	0.737	28	24.3	1.003	29	20.6	0.683	27	49.7	0.695	28	57.1	0.64	25	74.3	0.577	27	41.9	0.52	28	61.7	1.044	28	25	1.084	29	12.8	0.757	28	60.3	1.046	28	32.9	0.532	27	62.1	0.624
P04844	Dolichyl-diphosphooligosaccharide--protein glycosyltransferase subunit 2 OS=Homo sapiens GN=RPN2 PE=1 SV=3 - [RPN2_HUMAN]	0.6751	8	17	33	125	1.086	11	8	0.81	11	11.1	1.155	10	40.3	1.016	11	25.2	1.047	11	66.4	1.253	11	41.5	0.84	11	76.7	1.301	11	50.2	0.998	11	54.7	1.085	10	16.8	0.915	10	31.6	0.996	10	53.5	0.965	10	19	0.924	10	17.1	0.904
P13073	Cytochrome c oxidase subunit 4 isoform 1, mitochondrial OS=Homo sapiens GN=COX4I1 PE=1 SV=1 - [COX41_HUMAN]	0.9704	6	17	30	240	1.015	32	23.6	1.043	32	11.9	0.879	31	63.1	1.027	32	19.3	0.861	31	75.8	0.793	31	59.3	0.697	31	100.2	1.033	30	133.6	0.729	30	106.7	0.983	39	26.6	0.99	39	9.6	0.89	38	41.9	0.985	39	17.5	0.663	38	76.5	0.703
P18077	60S ribosomal protein L35a OS=Homo sapiens GN=RPL35A PE=1 SV=2 - [RL35A_HUMAN]	0.9273	4	17	30	237	0.977	29	33.6	1.106	29	11.1	0.966	29	84.6	1.016	29	31.6	0.894	29	94.2	1.08	29	109.8	1.058	29	129.2	0.909	29	172.2	1.215	29	234.4	1.151	29	39.9	1.144	29	15.6	0.94	29	97.1	1.043	29	24.5	1.025	28	134	1.065
P18621	60S ribosomal protein L17 OS=Homo sapiens GN=RPL17 PE=1 SV=3 - [RL17_HUMAN]	0.9185	16	17	34	546	1.043	73	17.9	1.075	73	13.1	0.768	72	42.1	1.036	72	17.6	0.807	70	46.7	0.834	70	35.7	0.911	69	56.4	0.88	67	70.4	0.994	70	55.6	1.041	70	25.8	1.098	70	13.4	0.829	68	46.6	1.036	70	21.9	0.818	68	56.8	0.861
P23258	Tubulin gamma-1 chain OS=Homo sapiens GN=TUBG1 PE=1 SV=2 - [TBG1_HUMAN]	0.7871	5	17	35	175	1.04	18	17.9	1.036	18	18.8	0.971	18	39.8	0.986	18	14.5	1.069	18	36.7	0.927	18	34	0.994	17	40.7	1.038	16	59.3	0.948	17	53.2	1.064	18	30.3	1.055	18	20.8	1.034	18	46.4	0.984	18	20.1	1.076	18	42.4	1.094
P23368	NAD-dependent malic enzyme, mitochondrial OS=Homo sapiens GN=ME2 PE=1 SV=1 - [MAOM_HUMAN]	0.7534	4	17	40	158	1.003	18	16.6	1.012	18	22.9	0.636	16	37.4	1.026	18	15.3	0.672	15	55.3	0.616	15	49.9	0.387	13	104.5	0.622	11	90.6	0.517	12	61.9	1.046	24	21.1	0.951	24	16.5	0.798	21	57	0.965	24	21.5	0.493	19	68.2	0.702
P25398	40S ribosomal protein S12 OS=Homo sapiens GN=RPS12 PE=1 SV=3 - [RS12_HUMAN]	0.9773	1	17	21	387	1.128	66	18.4	1.137	66	14.1	0.713	65	53.5	1.097	66	21.7	0.623	65	83.2	0.682	66	56	0.813	64	61.7	0.689	63	90.5	0.751	64	101.2	1.047	61	27.3	1.122	61	18.3	0.752	61	52.1	1.023	61	19.6	0.601	61	93.8	0.687
P30050	60S ribosomal protein L12 OS=Homo sapiens GN=RPL12 PE=1 SV=1 - [RL12_HUMAN]	0.9697	5	17	27	372	1.028	59	21.9	1.059	58	13.8	0.989	58	31	0.997	59	21.6	1.001	57	43.9	0.918	57	36.5	1.33	58	47.4	1.296	58	51.7	1.24	57	36.8	1.023	51	17.8	1.073	51	14.1	1.019	50	26.8	1.021	51	21	0.936	50	45.9	0.984
P30519	Heme oxygenase 2 OS=Homo sapiens GN=HMOX2 PE=1 SV=2 - [HMOX2_HUMAN]	0.8671	14	17	36	228	1.024	23	33.9	0.936	23	14.8	1.009	23	53.8	1.085	23	20.2	1.082	21	47.6	1.127	23	45.1	0.925	23	55.1	0.93	22	66.8	0.856	22	101.8	1.094	24	19.8	1.017	24	20.2	1.261	24	52.8	1.066	24	24	0.986	23	43.7	1.127
P35250	Replication factor C subunit 2 OS=Homo sapiens GN=RFC2 PE=1 SV=3 - [RFC2_HUMAN]	0.7514	12	17	38	177	0.949	19	11.9	0.898	20	20	1.401	19	47.8	0.9	20	22.1	1.743	19	58.5	1.438	20	44	1.647	19	72.3	1.561	18	94.8	1.262	18	82.3	0.967	15	5.4	0.918	15	13.6	1.483	15	39.2	0.925	14	9.8	1.895	15	72.1	1.809
P37108	Signal recognition particle 14 kDa protein OS=Homo sapiens GN=SRP14 PE=1 SV=2 - [SRP14_HUMAN]	0.8235	3	17	19	209	0.999	37	22.3	1.046	34	16.9	1.19	36	35.4	1.026	36	28.3	1.529	33	30.1	1.285	34	38.8	1.368	34	50.7	1.495	32	31.9	1.589	32	38.5	1.044	31	26.4	1.069	31	15.3	1.248	31	52.2	0.964	31	16.7	1.331	27	50.3	1.319
P38432	Coilin OS=Homo sapiens GN=COIL PE=1 SV=1 - [COIL_HUMAN]	0.7431	1	17	55	204	0.808	16	46.5	0.747	16	25.8	2.098	16	41.6	0.753	16	32.4	2.417	16	100.7	2.098	16	51.2	1.705	16	56.3	1.541	16	92.3	1.501	16	67.5	0.913	18	24.7	0.848	18	34.5	1.98	18	47.3	0.909	18	26.6	2.34	18	45.1	2.232
P39019	40S ribosomal protein S19 OS=Homo sapiens GN=RPS19 PE=1 SV=2 - [RS19_HUMAN]	0.9241	7	17	29	374	1.059	52	15.9	1.159	52	11.9	0.795	52	40.3	1.109	52	16.2	0.801	52	46.3	0.77	52	54.1	0.904	48	40.1	0.87	46	44.4	0.887	50	52.1	1.072	53	15.5	1.138	53	14.4	0.821	53	44	1.027	53	13.7	0.778	53	53.3	0.821
P40937	Replication factor C subunit 5 OS=Homo sapiens GN=RFC5 PE=1 SV=1 - [RFC5_HUMAN]	0.9206	11	17	40	219	0.948	21	21.8	0.965	21	16.6	1.225	21	56.3	0.948	21	20.7	1.347	19	44.7	1.325	20	44.7	1.2	20	76.4	1.019	19	83.4	1.057	18	57.3	0.92	17	22	0.871	17	17.2	1.154	16	54.2	0.94	18	23.5	1.359	16	36.8	1.289
P41240	Tyrosine-protein kinase CSK OS=Homo sapiens GN=CSK PE=1 SV=1 - [CSK_HUMAN]	0.7378	9	17	37	152	1.019	18	18.5	1.038	18	12.3	0.925	18	48.4	0.96	18	19	0.831	17	49	0.86	18	58.2	0.702	17	60	0.661	17	74.4	0.724	16	80	1.096	15	27.8	1.097	15	11.6	0.825	15	40.8	1.081	15	17	0.821	15	68.2	0.768
P46776	60S ribosomal protein L27a OS=Homo sapiens GN=RPL27A PE=1 SV=2 - [RL27A_HUMAN]	0.8378	6	17	25	216	1.023	27	19.4	1.096	27	11.4	0.9	27	51.6	0.946	27	21.9	0.911	26	56.4	0.893	27	50.7	1.152	26	58.9	1.1	27	64.6	1.119	26	53.7	1.164	27	35.2	1.061	27	19.1	1.005	27	69.8	0.973	27	31.1	1.317	26	95.6	1.2
P47813	Eukaryotic translation initiation factor 1A, X-chromosomal OS=Homo sapiens GN=EIF1AX PE=1 SV=2 - [IF1AX_HUMAN]	0.8472	4	17	25	217	1.026	33	19.6	1.078	33	8.9	0.728	33	46.2	1.057	33	10.4	0.688	33	46.4	0.737	33	64.9	0.64	32	115.1	0.688	31	112	0.647	32	93.7	1.067	29	25	1.137	28	11.1	0.934	29	42.5	1.1	29	29.3	0.88	28	52.4	0.874
P51572	B-cell receptor-associated protein 31 OS=Homo sapiens GN=BCAP31 PE=1 SV=3 - [BAP31_HUMAN]	0.6911	9	17	32	175	1.071	24	11.8	0.752	24	8.9	0.79	24	44	0.975	24	10.8	0.79	24	38.8	0.951	24	32.2	0.601	23	50.6	0.688	22	47.3	0.673	23	46.4	1.036	24	10.9	0.781	24	16.6	0.824	24	32.4	0.967	24	11.9	0.787	24	22.7	0.848
P55199	RNA polymerase II elongation factor ELL OS=Homo sapiens GN=ELL PE=1 SV=1 - [ELL_HUMAN]	0.7472	7	17	64	225	0.868	12	19.7	0.79	12	15.2	1.955	12	53.8	0.912	12	35.9	2.291	12	69.5	1.85	12	40.3	2.289	12	74.8	2.445	12	56.6	2.233	12	76	0.866	11	20	0.889	11	25.6	2.151	11	41.7	0.999	11	39.3	2.626	11	36.2	2.106
P61353	60S ribosomal protein L27 OS=Homo sapiens GN=RPL27 PE=1 SV=2 - [RL27_HUMAN]	0.9485	7	17	28	280	0.936	38	16.5	1.022	38	10.9	1.086	38	28.3	0.976	38	15.9	1.161	38	41.6	1.136	38	34.2	1.293	38	65.4	1.33	37	74.1	1.527	38	61.8	0.995	38	19.8	1.03	38	12.1	1.18	37	37.4	0.978	38	19.5	1.314	38	48.5	1.142
P82979	SAP domain-containing ribonucleoprotein OS=Homo sapiens GN=SARNP PE=1 SV=3 - [SARNP_HUMAN]	0.9095	6	17	30	179	0.804	23	21.4	0.799	23	26.3	2.722	23	45.8	0.777	23	26.4	3.032	23	45.9	2.71	23	51.2	2.946	23	46.5	2.727	23	51.4	2.757	23	37.3	0.872	23	15.9	0.771	22	18.8	2.343	23	45	0.747	23	27	2.658	23	41.5	2.377
P84098	60S ribosomal protein L19 OS=Homo sapiens GN=RPL19 PE=1 SV=1 - [RL19_HUMAN]	0.852	6	17	40	414	1.058	43	20.3	1.125	43	13.8	0.972	43	64.6	1.076	43	20.5	1.206	43	59.9	1.103	43	58.2	1.436	42	75.4	1.167	42	110.2	1.318	43	101.5	1.125	36	21.6	1.117	36	10.5	0.95	36	47.6	1.086	36	17.4	1.049	36	67	1.103
Q05655	Protein kinase C delta type OS=Homo sapiens GN=PRKCD PE=1 SV=2 - [KPCD_HUMAN]	0.6923	6	17	53	216	1.067	15	23.1	1.035	15	9.8	0.631	15	75.8	0.99	15	20.9	0.615	14	60.3	0.769	13	37.4	0.721	12	56.9	0.698	12	56.3	0.672	13	82.5	0.979	16	17.4	0.974	16	25	0.985	16	43.7	1.067	16	23.8	0.903	15	38.7	1.004
Q07866-6	Isoform N of Kinesin light chain 1 OS=Homo sapiens GN=KLC1 - [KLC1_HUMAN]	0.785	37	17	71	246	1.163	10	13	1.146	10	10.5	0.842	10	47.5	1.096	10	10.5	0.815	10	46.2	0.746	10	28.8	0.782	10	39.9	0.901	10	40.5	0.826	10	51.9	1.082	15	11.8	1.108	15	11.7	0.733	15	25.5	1.069	15	14.1	0.678	15	52	0.721
Q13057-2	Isoform 2 of Bifunctional coenzyme A synthase OS=Homo sapiens GN=COASY - [COASY_HUMAN]	0.6037	10	17	29	118	1	12	9.3	1.065	12	7.8	0.651	12	55.7	1.038	12	12.8	0.655	12	59.4	0.706	12	34.4	0.775	12	69.9	0.695	11	65.2	0.669	11	116.3	0.903	13	21.1	1.006	13	21.1	0.555	13	48.9	0.975	13	9.4	0.608	12	34.2	0.645
Q13228	Selenium-binding protein 1 OS=Homo sapiens GN=SELENBP1 PE=1 SV=2 - [SBP1_HUMAN]	0.7097	11	17	34	160	0.993	18	29	1.107	18	11.2	0.639	18	64.8	0.991	18	35.5	0.58	17	138.7	0.642	18	115.1	0.655	16	90.4	0.808	15	45.4	0.646	17	65.1	0.962	20	16.1	1.12	20	14.1	0.734	20	22.9	0.978	20	19.5	0.767	20	62.9	0.773
Q13868	Exosome complex component RRP4 OS=Homo sapiens GN=EXOSC2 PE=1 SV=2 - [EXOS2_HUMAN]	0.7099	9	17	25	171	0.933	28	23.8	0.898	28	20.9	1.419	27	49.1	0.895	27	25.4	1.953	27	67.9	1.487	27	55.1	2.033	27	81.1	2.051	27	106.2	2.125	27	71.4	0.938	24	18.7	0.948	24	24.2	1.711	23	56.5	0.972	25	24.6	1.934	24	57.4	1.933
Q14019	Coactosin-like protein OS=Homo sapiens GN=COTL1 PE=1 SV=3 - [COTL1_HUMAN]	0.9718	3	17	22	166	1.14	21	19.5	1.295	21	7	0.601	20	87.8	1.174	21	13.3	0.606	19	104.6	0.584	20	92.8	0.941	16	113.7	1.029	16	118	0.952	16	161.4	1.065	24	8.8	1.261	24	10.8	0.514	23	80.9	1.13	24	14.3	0.442	21	97.3	0.552
Q15654	Thyroid receptor-interacting protein 6 OS=Homo sapiens GN=TRIP6 PE=1 SV=3 - [TRIP6_HUMAN]	0.7689	7	17	28	138	0.97	20	12	1.139	19	16	0.909	19	25	1.057	19	17.4	0.877	19	123.8	0.8	19	53.1	0.861	19	97.1	0.921	18	100	0.764	18	88.1	1.072	17	24.7	1.104	16	21.4	0.988	16	56.8	0.992	17	19	0.966	17	62	0.913
Q15738	Sterol-4-alpha-carboxylate 3-dehydrogenase, decarboxylating OS=Homo sapiens GN=NSDHL PE=1 SV=2 - [NSDHL_HUMAN]	0.6971	2	17	32	152	1.063	12	13.1	0.955	12	22.6	0.949	12	26.6	1.051	12	22.3	0.982	12	57.1	1.168	12	35.3	1.034	12	67.9	1.149	12	64.3	0.992	12	66	1.013	13	29.6	0.773	13	18	0.85	13	41.1	0.924	13	10.7	0.889	13	55	0.952
Q15911	Zinc finger homeobox protein 3 OS=Homo sapiens GN=ZFHX3 PE=1 SV=2 - [ZFHX3_HUMAN]	0.4634	3	17	200	649	0.735	8	29	0.72	8	24.2	2.244	8	68	0.804	8	36	2.701	8	94.1	2.854	8	53.9	1.908	8	98.2	2.344	8	87.2	2.273	8	71.3	0.98	7	21.5	0.808	7	19.1	2.491	8	75.8	0.983	8	12.2	2.739	8	75.8	2.215
Q27J81	Inverted formin-2 OS=Homo sapiens GN=INF2 PE=1 SV=2 - [INF2_HUMAN]	0.5588	4	17	68	215	1.042	19	18	0.959	19	15.8	0.948	18	42	1.06	19	24.8	1.003	18	63.3	1.104	18	47.7	0.819	18	136	0.84	18	121.8	0.705	17	91	1.081	16	18.1	0.957	16	10.6	1.103	16	51.8	1.07	16	16.7	0.962	15	69.7	1.021
Q4G0N4	NAD kinase 2, mitochondrial OS=Homo sapiens GN=NADK2 PE=1 SV=2 - [NAKD2_HUMAN]	0.733	9	17	42	149	0.935	12	26.4	0.939	12	17.2	0.896	12	70.2	1.06	12	40.4	0.724	10	34.9	0.646	10	48.7	0.824	9	102	0.621	8	13.7	0.671	9	76.8	0.935	18	29.4	1.031	18	21.4	0.686	18	49.8	0.964	18	34.9	0.775	16	57.1	0.723
Q5JSH3-2	Isoform 2 of WD repeat-containing protein 44 OS=Homo sapiens GN=WDR44 - [WDR44_HUMAN]	0.6552	7	17	67	234	1.19	14	15.5	1.189	14	11.7	0.793	14	63.6	1.199	14	19.8	0.885	13	101.3	0.814	14	27.9	0.935	13	99.9	1.165	12	34.5	1.055	13	70.4	0.919	10	19.3	1.034	10	10.8	0.901	10	43.3	1.051	10	12.7	0.992	10	33.5	0.919
Q5T3I0-3	Isoform 3 of G patch domain-containing protein 4 OS=Homo sapiens GN=GPATCH4 - [GPTC4_HUMAN]	0.8115	10	17	57	272	0.831	27	20.4	0.792	27	18.9	1.839	27	33.8	0.841	27	28.5	2.393	27	46.4	2.111	28	32.5	2.759	28	54.2	2.962	27	53.8	2.94	28	65.5	0.893	25	18.2	0.794	25	35.8	2.138	25	50.9	0.924	25	24.4	2.745	25	68.1	2.425
Q68CZ2	Tensin-3 OS=Homo sapiens GN=TNS3 PE=1 SV=2 - [TENS3_HUMAN]	0.5924	21	17	80	261	1.065	17	16.4	1.068	17	12.5	0.777	16	36.7	1.102	17	9.5	0.924	15	48.5	0.992	16	44	1.014	14	50.5	1.177	14	40.6	0.99	14	48.1	1.122	12	11.3	1.055	12	12	0.747	12	72.4	1.078	12	7.2	0.866	12	38.3	0.835
Q7Z478	ATP-dependent RNA helicase DHX29 OS=Homo sapiens GN=DHX29 PE=1 SV=2 - [DHX29_HUMAN]	0.637	5	17	103	320	1.037	14	22.5	1.131	13	11.6	0.763	13	85	0.997	13	17	0.77	13	92.8	0.77	13	114.5	0.981	10	69.9	0.964	10	62.5	0.925	12	53.2	0.984	10	12.9	1.038	10	13.9	0.702	10	34	1.041	10	16	0.792	10	48.4	0.845
Q8IVL5	Prolyl 3-hydroxylase 2 OS=Homo sapiens GN=P3H2 PE=1 SV=1 - [P3H2_HUMAN]	0.7048	7	17	47	169	1.074	17	25.2	1.02	17	16.9	0.829	17	55.3	1.022	17	15.1	0.589	17	43.2	0.668	17	53.1	0.481	17	75.7	0.519	16	76.8	0.492	17	87.4	0.926	13	18.9	0.949	13	13.5	0.799	13	33.4	0.925	13	8.1	0.618	13	47.8	0.591
Q8IZ83	Aldehyde dehydrogenase family 16 member A1 OS=Homo sapiens GN=ALDH16A1 PE=1 SV=2 - [A16A1_HUMAN]	0.5312	7	17	40	125	0.922	9	26.5	0.956	9	22.4	0.592	9	75.8	0.966	9	24.3	0.761	8	34.3	0.643	9	18.5	0.815	7	14.1	0.793	7	11.6	0.862	7	87	1.114	14	17	1.043	13	13.2	0.842	14	29.8	1.074	13	19.7	0.829	12	33.8	0.805
Q8WUF5	RelA-associated inhibitor OS=Homo sapiens GN=PPP1R13L PE=1 SV=4 - [IASPP_HUMAN]	0.5676	5	17	43	139	1.068	17	12	1.11	17	19.3	0.797	17	60.6	1.162	17	14.3	0.688	17	63.6	0.758	17	42.5	0.736	17	52.9	0.711	17	80	0.644	17	74.7	1.011	17	11.9	1.003	17	8.9	0.777	17	21.8	1.051	17	15.7	0.686	17	48.2	0.786
Q92621	Nuclear pore complex protein Nup205 OS=Homo sapiens GN=NUP205 PE=1 SV=3 - [NU205_HUMAN]	0.4751	8	17	94	256	0.903	13	10.9	0.841	13	20.5	1.019	13	35.2	0.844	13	12.5	1.365	13	21.3	1.557	13	21.1	0.907	12	42.3	0.918	10	14.7	0.924	12	26.8	0.947	11	26.4	0.831	11	25.1	1.028	11	48.3	0.826	11	21.4	1.354	11	42.3	1.417
Q96C57	Uncharacterized protein C12orf43 OS=Homo sapiens GN=C12orf43 PE=1 SV=2 - [CL043_HUMAN]	0.8779	9	17	25	185	0.868	20	15.4	0.913	20	17.5	1.921	20	30.3	0.916	20	15.9	2.369	20	40.3	2.222	20	19.3	4.127	20	78.3	4.562	20	69	4.974	20	75.6	0.9	21	27.6	0.834	21	18.7	1.971	21	44.5	0.83	21	19.2	2.412	21	39.1	1.858
Q96G46	tRNA-dihydrouridine(47) synthase [NAD(P)(+)]-like OS=Homo sapiens GN=DUS3L PE=1 SV=2 - [DUS3L_HUMAN]	0.6677	11	17	47	156	0.916	9	12.8	0.929	9	17	0.764	9	18.2	0.978	9	4.8	0.702	8	47.5	0.869	9	32.4	0.665	9	19.3	0.706	7	20.3	0.706	8	39.1	0.987	10	13.4	1	10	10.1	0.861	10	25.2	0.968	10	11.1	0.886	10	26.7	0.881
Q96I99	Succinate--CoA ligase [GDP-forming] subunit beta, mitochondrial OS=Homo sapiens GN=SUCLG2 PE=1 SV=2 - [SUCB2_HUMAN]	0.8056	7	17	46	163	1.022	14	15.7	1.062	14	10.6	0.776	14	30.4	1.073	14	12.5	0.563	14	42.4	0.654	14	37.9	0.566	14	55.9	0.597	13	92	0.643	13	63.6	1.002	14	13.3	0.992	14	7.5	0.705	14	22.4	0.998	14	8.7	0.534	13	59.3	0.586
Q96PV6-2	Isoform 2 of Leukocyte receptor cluster member 8 OS=Homo sapiens GN=LENG8 - [LENG8_HUMAN]	0.67	12	17	63	215	0.878	13	22.1	0.839	13	33.6	1.437	13	28.5	0.938	13	24.1	1.333	13	49.1	1.324	13	34.7	1.847	13	56.4	1.318	13	73.8	1.37	13	62.7	0.923	13	24.3	0.949	13	32.8	1.512	13	28.4	0.961	13	32.8	1.59	13	25.2	1.623
Q96RL1	BRCA1-A complex subunit RAP80 OS=Homo sapiens GN=UIMC1 PE=1 SV=2 - [UIMC1_HUMAN]	0.6314	11	17	56	201	0.849	14	23.4	0.813	14	20	1.911	14	36.3	0.846	14	12.3	2.386	14	32.2	1.973	14	28.9	2.034	14	29.6	2.225	14	60.6	2.432	14	46.9	0.902	14	17.2	0.894	14	18.1	1.853	14	36.9	0.835	14	25.3	2.254	14	40.6	1.957
Q99996-2	Isoform 2 of A-kinase anchor protein 9 OS=Homo sapiens GN=AKAP9 - [AKAP9_HUMAN]	0.7279	16	17	358	939	1.125	7	18.5	1.161	8	13.9	0.714	7	50.8	1.043	8	18	0.673	8	109.9	0.75	8	63.5	0.581	6	129.2	0.749	7	484.1	0.718	7	68.8	0.897	7	29.4	0.922	7	21	0.588	7	80.4	0.928	7	11.4	0.29	7	130.1	0.648
Q9BRK5	45 kDa calcium-binding protein OS=Homo sapiens GN=SDF4 PE=1 SV=1 - [CAB45_HUMAN]	0.5994	8	17	31	116	0.984	10	15.3	0.983	10	17.3	0.997	10	30	1.027	10	24.4	0.849	10	28.6	0.906	10	54.6	0.665	10	18.1	0.678	10	37.9	0.656	10	36.3	0.971	11	18.4	0.937	11	35.2	1.027	11	61.8	1.114	11	16	0.907	11	64.9	0.835
Q9BUF5	Tubulin beta-6 chain OS=Homo sapiens GN=TUBB6 PE=1 SV=1 - [TBB6_HUMAN]	0.8744	14	17	43	1265	1.131	37	26.6	1.107	37	18.6	0.667	36	60.3	1.161	37	18.1	0.574	36	96	0.644	36	75.5	0.559	33	118.4	0.652	32	73.1	0.623	32	60.4	0.994	40	19.1	1.055	40	16.3	0.677	36	49	1.063	40	16.6	0.813	34	61.7	0.648
Q9H1E3	Nuclear ubiquitous casein and cyclin-dependent kinase substrate 1 OS=Homo sapiens GN=NUCKS1 PE=1 SV=1 - [NUCKS_HUMAN]	0.7695	4	17	33	168	0.927	19	23.3	1.006	19	19.8	1.629	19	68.9	1.024	19	21.8	1.821	19	91	1.789	19	62.6	1.578	19	72.5	1.722	19	73.5	1.581	19	70.8	0.896	21	20.3	0.973	21	18.8	1.601	21	39.1	0.801	21	43.4	1.696	21	63.1	1.725
Q9H8H0	Nucleolar protein 11 OS=Homo sapiens GN=NOL11 PE=1 SV=1 - [NOL11_HUMAN]	0.6189	8	17	40	177	0.991	17	30.2	0.832	17	19.6	1.472	16	60.6	0.86	16	15.4	1.78	17	51.1	1.969	17	49	2.329	17	84.9	1.936	17	53.8	1.828	17	85.3	0.905	17	30.6	0.837	17	16.4	1.456	17	38.1	0.795	17	18.3	1.789	17	27.4	1.853
Q9NPF5	DNA methyltransferase 1-associated protein 1 OS=Homo sapiens GN=DMAP1 PE=1 SV=1 - [DMAP1_HUMAN]	0.7195	11	17	43	139	0.833	16	24.7	0.84	16	29.5	1.978	17	48.4	0.908	17	22.1	2.207	17	52.3	2.016	17	32.3	1.842	17	70	1.642	17	82.3	1.999	17	116.9	0.901	16	25.1	0.864	16	20.8	2.355	17	77.7	0.989	16	22.5	2.341	17	69.3	2.161
Q9NU22	Midasin OS=Homo sapiens GN=MDN1 PE=1 SV=2 - [MDN1_HUMAN]	0.5534	5	17	313	695	1.077	7	6.8	0.942	7	8.6	1.114	7	44.3	0.97	7	17.5	1.619	7	42.5	1.995	7	10.9	1.572	6	86.2	1.555	5	91.2	1.461	5	88.9	1.003	9	16.6	0.725	9	41.3	1.423	9	45.2	0.894	9	24	2.305	9	51.1	2.164
Q9UBL3	Set1/Ash2 histone methyltransferase complex subunit ASH2 OS=Homo sapiens GN=ASH2L PE=1 SV=1 - [ASH2L_HUMAN]	0.6338	9	17	44	153	0.83	11	18.4	0.776	11	25.7	2.563	11	31.2	0.813	11	16.1	3.091	11	38.2	2.793	11	32.1	2.821	11	26.8	2.428	11	42.2	2.748	11	49.6	0.827	11	21	0.858	11	13	2.325	11	33.2	0.944	10	16.7	2.601	11	39.4	2.358
Q9UJX3	Anaphase-promoting complex subunit 7 OS=Homo sapiens GN=ANAPC7 PE=1 SV=4 - [APC7_HUMAN]	0.7112	9	17	42	180	0.887	18	21.6	0.951	17	20.1	1.365	18	48.6	0.915	18	24.1	1.772	17	40.2	1.651	18	38	1.645	17	44	1.613	16	71.1	1.456	17	97.7	0.856	16	18.7	0.832	16	19.8	1.653	16	50.6	0.82	16	17.8	1.511	16	37.9	1.352
Q9Y2K7	Lysine-specific demethylase 2A OS=Homo sapiens GN=KDM2A PE=1 SV=3 - [KDM2A_HUMAN]	0.6962	7	17	103	286	0.752	13	43.9	0.762	13	41.7	2.158	14	54.5	0.929	14	20	3.095	14	50.3	2.801	14	43.6	3.375	14	63.2	4.037	13	38.8	3.434	14	83.1	0.874	16	25.6	0.732	16	30.2	2.22	16	43.1	0.865	16	12.6	2.778	16	51.1	2.748
Q9Y305-4	Isoform 4 of Acyl-coenzyme A thioesterase 9, mitochondrial OS=Homo sapiens GN=ACOT9 - [ACOT9_HUMAN]	0.8527	8	17	45	191	1.113	20	15.7	1.036	20	16.7	0.81	19	26.9	1.052	20	20.1	0.701	16	51.9	0.86	19	24.3	0.837	15	34.6	0.915	16	43.8	0.867	17	26.9	0.964	18	19.5	0.982	18	19.4	0.63	17	55.2	1.003	18	9.5	0.654	15	42.6	0.628
Q9Y314	Nitric oxide synthase-interacting protein OS=Homo sapiens GN=NOSIP PE=1 SV=1 - [NOSIP_HUMAN]	0.9103	9	17	34	175	1.014	28	13.6	1.004	28	9.2	1.255	28	53.6	1.005	28	14.9	1.303	28	58.3	1.412	28	30.4	1.415	28	76.9	1.299	28	74.5	1.284	28	73.5	0.985	26	14.6	1.052	26	20.9	1.272	25	42.5	1.044	25	17.6	1.35	25	47.8	1.273
Q9Y4X5	E3 ubiquitin-protein ligase ARIH1 OS=Homo sapiens GN=ARIH1 PE=1 SV=2 - [ARI1_HUMAN]	0.675	6	17	41	180	0.913	13	15.5	0.994	13	12	0.977	12	41.6	0.964	13	20.5	1.033	12	37.8	0.967	13	18.3	0.855	13	53.9	0.673	12	31.3	0.752	12	56.4	0.976	14	16.8	0.957	14	21	0.925	14	41.2	0.96	14	26.6	1.037	14	45	1.051
A8K644	Splicing factor, arginine/serine-rich 4, isoform CRA_b OS=Homo sapiens GN=SFRS4 PE=2 SV=1 - [A8K644_HUMAN]	0.7672	7	17	74	277	0.875	16	41.1	0.9	16	22.5	3.229	16	75.2	0.937	16	40.7	3.738	16	68	3.224	16	50.2	3.741	16	70.8	3.657	16	100.6	4.194	16	120.8	0.862	18	19.1	0.825	18	39.9	2.232	18	46.3	0.84	18	32.6	2.922	18	56.2	2.414
B2R983	cDNA, FLJ94267, highly similar to Homo sapiens glutathione S-transferase omega 1 (GSTO1), mRNA OS=Homo sapiens PE=2 SV=1 - [B2R983_HUMAN]	0.8797	6	17	28	204	0.961	21	24.3	1.164	21	8.2	0.616	20	102.7	1.085	21	30.5	0.638	19	90.9	0.615	20	76.6	0.654	18	72.2	0.712	18	99.1	0.784	19	93.6	0.994	25	23.3	1.089	25	14.1	0.55	24	88.3	1.024	25	17.8	0.732	23	107.6	0.703
B3KN57	cDNA FLJ13654 fis, clone PLACE1011477, highly similar to Sorting nexin-2 OS=Homo sapiens PE=2 SV=1 - [B3KN57_HUMAN]	0.684	6	17	43	172	0.984	17	6.1	1.098	17	7.1	0.672	17	52.1	1.008	17	14.4	0.663	17	57.7	0.665	17	57.6	0.613	16	54.7	0.556	17	80.6	0.786	17	83.1	1.012	19	5.9	1.116	19	14.3	0.779	19	56.2	1.039	19	11.2	0.749	19	43.4	0.662
Q8NCF7	cDNA FLJ90278 fis, clone NT2RP1000325, highly similar to Phosphate carrier protein, mitochondrialprecursor OS=Homo sapiens PE=2 SV=1 - [Q8NCF7_HUMAN]	0.626	9	17	32	230	1.032	25	20	0.846	25	11.4	0.597	25	40	0.983	25	8.3	0.506	24	79.8	0.668	25	51.4	0.531	21	100.5	0.454	22	112.1	0.558	23	61	1.053	29	19.4	0.848	29	11.4	0.505	28	68.8	1.016	29	14.2	0.542	23	61.9	0.481
B4DU42	cDNA FLJ56153, highly similar to Homo sapiens transforming growth factor beta regulator 4 (TBRG4), transcript variant 1, mRNA OS=Homo sapiens PE=2 SV=1 - [B4DU42_HUMAN]	0.4751	13	17	37	124	0.889	14	8.6	0.896	14	15.9	0.615	14	42.3	0.93	14	13.6	0.606	14	36.1	0.674	14	24.3	0.606	14	33.1	0.665	14	70.7	0.6	14	57.2	0.903	12	13.6	0.908	12	10.2	0.747	12	43.7	1.011	12	8.2	0.742	12	75.1	0.725
B4DV28	cDNA FLJ54170, highly similar to Cytosolic nonspecific dipeptidase OS=Homo sapiens PE=2 SV=1 - [B4DV28_HUMAN]	0.7408	23	17	35	147	1.023	20	9.5	1.093	20	13.1	0.651	19	35.5	1.057	20	12.9	0.569	18	55.8	0.65	18	48.2	0.644	19	54.8	0.607	18	42.6	0.621	18	58	1.042	17	16.8	1.139	17	14.7	0.901	16	31.5	1.101	17	15.7	0.715	15	26.9	0.826
Q53HS1	Achalasia, adrenocortical insufficiency, alacrimia (Allgrove, triple-A) variant (Fragment) OS=Homo sapiens PE=2 SV=1 - [Q53HS1_HUMAN]	0.4963	9	17	23	125	1.129	17	20.2	0.974	17	19.9	1.433	17	64.6	0.974	17	16.9	1.687	16	54.3	1.755	17	98.9	1.079	16	83.1	1.147	15	82.4	1.087	15	82.8	0.949	18	21.6	0.851	19	23.2	1.64	19	47.1	0.9	19	27	1.725	19	51.3	1.862
B0AZS5	Kinesin-like protein OS=Homo sapiens PE=2 SV=1 - [B0AZS5_HUMAN]	0.7424	9	17	65	288	0.877	12	16.9	0.902	12	14.7	1.32	12	48.7	0.956	12	14.1	1.472	12	79	1.388	12	79.2	1.63	12	96.6	1.723	12	139.7	1.355	12	119.7	0.955	15	18.4	0.944	15	26.8	1.44	15	26.1	0.929	15	21.1	1.501	15	26.7	1.312
B4E1C1	cDNA FLJ55943, highly similar to Death domain-associated protein 6 OS=Homo sapiens PE=2 SV=1 - [B4E1C1_HUMAN]	0.6981	12	17	60	170	0.934	14	15.3	0.886	14	13.9	1.932	13	30.9	1.026	14	26.8	2.234	14	33.3	1.981	14	27.1	2.025	14	52.5	1.688	14	91.4	1.694	14	72	0.889	13	26.7	0.849	13	17.7	1.94	13	44.3	0.942	13	27.4	2.152	13	22.7	1.688
A8K7F6	cDNA FLJ78244, highly similar to Homo sapiens eukaryotic translation initiation factor 4A, isoform 1 (EIF4A1), mRNA OS=Homo sapiens PE=2 SV=1 - [A8K7F6_HUMAN]	0.9828	24	17	53	827	1.006	61	17.2	1.068	61	10.2	0.784	59	51.4	1.034	61	17	0.733	59	84	0.819	59	51.2	0.76	56	95.2	0.822	57	92	0.76	58	97.5	0.981	61	16.9	1.037	61	12.4	0.832	59	51.3	1.041	61	17.1	0.768	58	52.7	0.734
B4DR36	cDNA FLJ56414, highly similar to Homo sapiens proline-, glutamic acid-, leucine-rich protein 1 (PELP1), mRNA OS=Homo sapiens PE=2 SV=1 - [B4DR36_HUMAN]	0.4619	11	17	40	173	0.927	17	29.6	0.76	17	42.2	1.05	17	43	0.916	16	25.7	1.3	17	35	1.441	17	29	1.676	17	28.6	1.558	17	50.8	1.446	17	72.4	0.896	18	17.8	0.793	18	36.1	1.253	18	61	0.882	18	27.6	1.315	18	69.6	1.428
B7ZMF2	Fanconi anemia, complementation group I OS=Homo sapiens GN=FANCI PE=2 SV=1 - [B7ZMF2_HUMAN]	0.6303	12	17	85	232	0.885	13	33.8	0.931	14	9.5	0.885	11	25.8	0.865	14	24	1.124	12	22.3	1.051	12	20.9	0.918	11	22.5	0.998	11	41.3	0.974	11	49.8	0.882	10	20.6	0.933	12	16.7	0.988	10	34.2	0.833	11	17.7	1.203	10	17.4	1.077
A0A0D9SG72	Syntaxin-binding protein 1 OS=Homo sapiens GN=STXBP1 PE=1 SV=2 - [A0A0D9SG72_HUMAN]	0.819	11	17	53	197	1.021	18	19.8	0.958	18	10.2	1.159	18	21.8	1.032	18	17.2	1.088	18	44.5	1.164	17	32.9	0.816	15	80.2	0.887	16	53.2	0.689	16	105.3	1.065	19	16.5	1.022	19	16.2	1.251	19	36.7	1.006	19	20.8	1.198	19	39.1	1.251
M0QWZ7	Serine--tRNA ligase, mitochondrial OS=Homo sapiens GN=SARS2 PE=1 SV=1 - [M0QWZ7_HUMAN]	0.6583	13	17	42	178	0.946	19	10.6	0.964	19	13.2	0.901	19	42.4	0.99	19	19.7	0.811	19	58.1	0.8	19	66.4	1.02	19	88.3	1.141	16	87.9	1.006	19	81.8	1.041	16	21	1.045	16	10.2	1.096	16	33.8	1.016	16	21.3	0.953	16	46.6	0.998
A0A0C4DGQ5	Calpain small subunit 1 OS=Homo sapiens GN=CAPNS1 PE=1 SV=1 - [A0A0C4DGQ5_HUMAN]	0.8665	12	17	30	219	1.027	22	22.3	1.069	22	13.4	0.64	21	71.6	1.095	22	20.9	0.461	21	109.1	0.611	21	77.2	0.426	19	129.5	0.627	16	137.9	0.397	19	108.5	0.949	22	15.3	1.034	22	19.1	0.565	22	27.6	1.02	22	15.1	0.484	21	64.4	0.56
A0A024R201	Proteasome (Prosome, macropain) 26S subunit, non-ATPase, 13, isoform CRA_a OS=Homo sapiens GN=PSMD13 PE=4 SV=1 - [A0A024R201_HUMAN]	0.6915	15	17	28	160	0.91	21	23	1.029	21	18.3	0.594	17	61.2	0.957	21	11.3	0.648	17	112.7	0.521	19	83.1	0.735	17	102.3	0.79	16	109.9	0.723	18	116.4	0.944	21	13.7	1.073	20	16.6	0.488	18	75.3	0.978	21	16.2	0.444	18	68.2	0.524
P22307-7	Isoform 7 of Non-specific lipid-transfer protein OS=Homo sapiens GN=SCP2 - [NLTP_HUMAN]	0.5726	13	16	42	170	0.902	14	14.2	1.039	14	15.5	0.73	13	33.1	0.959	14	14	0.507	13	56.7	0.574	13	89.3	0.484	13	76	0.442	13	48.3	0.402	13	89.4	1.022	10	22.5	1.052	10	10.2	0.873	10	48.6	1.088	10	13.9	0.569	10	57.5	0.721
B3KTM8	Mortality factor 4-like protein 1 OS=Homo sapiens GN=MORF4L1 PE=1 SV=1 - [B3KTM8_HUMAN]	0.8707	14	16	48	197	0.85	14	22.9	0.674	14	35.6	2.611	14	27.6	0.831	14	19.4	3.053	14	50.4	2.693	14	43.5	3.192	14	64.5	2.44	14	37.2	2.606	14	43.1	0.749	17	18.9	0.611	17	32.8	2.076	17	22.6	0.701	17	33.9	2.634	17	28.8	2.195
Q8NDF8-5	Isoform 5 of Non-canonical poly(A) RNA polymerase PAPD5 OS=Homo sapiens GN=PAPD5 - [PAPD5_HUMAN]	0.745	18	16	44	256	0.922	12	36.4	0.788	12	55.8	1.734	13	45.9	0.837	12	39.4	1.817	13	92.6	2.263	12	64.1	3.564	13	59.3	3.688	13	86.9	2.715	13	56.9	0.925	18	29.6	0.872	17	21.2	2.035	22	45.1	0.902	18	19.7	2.387	22	52.7	2.251
B4E0Y9	Serine/threonine-protein kinase 26 OS=Homo sapiens GN=STK26 PE=1 SV=1 - [B4E0Y9_HUMAN]	0.7671	23	16	36	233	1.024	17	18.2	1.052	18	17.7	0.628	18	59.1	0.978	18	22.7	0.546	18	148	0.63	18	55.6	0.416	16	220.2	0.326	17	198.6	0.306	18	130.3	1.008	20	20	1.105	19	18.7	0.826	20	108.1	1.046	20	20	0.848	19	127.4	0.781
Q6P996-4	Isoform 4 of Pyridoxal-dependent decarboxylase domain-containing protein 1 OS=Homo sapiens GN=PDXDC1 - [PDXD1_HUMAN]	0.7053	17	16	48	138	1.117	12	18.6	1.064	12	11.4	0.736	12	28.4	1.094	12	12.9	0.735	11	46	0.732	12	36.1	0.714	11	56.5	0.814	9	21.9	0.823	10	59	1.125	16	11.2	1.047	16	8.9	0.99	15	25.5	0.997	15	19.9	0.833	14	23.7	0.841
Q9NQW7-3	Isoform 3 of Xaa-Pro aminopeptidase 1 OS=Homo sapiens GN=XPNPEP1 - [XPP1_HUMAN]	0.7147	10	16	51	336	1.065	19	17.6	1.115	19	14.2	1.09	19	95	1.071	19	14	1.122	19	78	1.126	19	71.1	1.274	19	110.4	1.228	19	75.1	1.329	19	82.9	0.955	14	17.4	1.012	14	17.8	0.974	14	48.7	1.062	14	9.7	1.181	14	43.7	0.961
H0YDD4	Acetyltransferase component of pyruvate dehydrogenase complex (Fragment) OS=Homo sapiens GN=DLAT PE=1 SV=1 - [H0YDD4_HUMAN]	0.8434	10	16	41	124	0.956	10	25.9	1.024	10	7.1	1.036	10	25.2	1.116	10	9.8	0.817	10	48.7	0.87	10	14.5	0.856	10	30.8	0.614	10	95.9	0.706	10	55.3	1.078	12	16.2	1.128	12	12.6	0.855	11	27.6	1.038	12	14.5	0.752	11	85	0.763
H0YL70	Transducin-like enhancer protein 3 OS=Homo sapiens GN=TLE3 PE=1 SV=1 - [H0YL70_HUMAN]	0.4834	33	16	42	167	0.93	13	15	1.026	13	12	0.99	13	44.9	0.985	13	16.1	1.04	13	45.3	1.082	13	37.3	0.882	13	100.3	0.772	13	69	0.833	13	60.1	0.974	16	13	1.057	16	13.9	0.922	16	39	1.026	16	8.3	0.991	16	43.8	0.945
O00560	Syntenin-1 OS=Homo sapiens GN=SDCBP PE=1 SV=1 - [SDCB1_HUMAN]	0.8289	7	16	22	320	0.956	22	12.6	1.101	22	15.1	0.756	22	40	1.002	22	12	0.739	21	54.1	0.717	22	62.5	0.677	20	42.8	0.768	19	72.2	0.699	19	32.5	1.067	26	20.9	1.094	26	16.1	0.881	25	37.7	1.123	26	22	0.689	25	66.4	0.916
O15143	Actin-related protein 2/3 complex subunit 1B OS=Homo sapiens GN=ARPC1B PE=1 SV=3 - [ARC1B_HUMAN]	0.7823	7	16	35	183	0.944	18	26	1.118	18	16.1	0.736	18	47.5	0.969	18	18.5	0.696	18	59.3	0.712	18	56.6	0.734	18	65.6	0.641	18	39.8	0.613	18	46	0.929	18	18.7	1.098	18	12.8	0.739	18	33.6	0.98	18	17.2	0.766	18	62.9	0.767
O15357	Phosphatidylinositol 3,4,5-trisphosphate 5-phosphatase 2 OS=Homo sapiens GN=INPPL1 PE=1 SV=2 - [SHIP2_HUMAN]	0.558	7	16	70	189	1.148	10	13.3	1.046	10	18.5	0.53	9	101.2	1.096	10	13.3	0.623	9	68	0.602	9	89.8	0.301	8	389.5	0.557	8	111.9	0.284	8	314.9	1.143	11	12.9	1.018	11	8.8	0.552	10	39.3	1.07	11	5.9	0.496	9	88	0.665
O60502	Protein O-GlcNAcase OS=Homo sapiens GN=MGEA5 PE=1 SV=2 - [OGA_HUMAN]	0.6627	6	16	57	173	1.106	14	17.2	1.091	14	17.5	0.627	12	33.4	1.071	14	19.7	0.542	12	51.4	0.645	12	25.8	0.619	12	71.3	0.637	11	51.4	0.681	11	57.4	1.162	10	12.5	1.27	11	12.4	0.911	10	69.5	1.281	11	18.1	0.775	9	96.1	0.91
O75390	Citrate synthase, mitochondrial OS=Homo sapiens GN=CS PE=1 SV=2 - [CISY_HUMAN]	0.7361	21	16	40	306	0.94	32	15.7	0.919	32	16.7	0.597	31	41.3	0.965	33	17.8	0.53	31	64.8	0.58	33	50.1	0.435	30	115.4	0.473	29	110	0.502	29	55.4	0.927	33	23.4	0.893	32	12.5	0.549	32	43.9	0.948	32	18	0.535	29	115	0.567
O75531	Barrier-to-autointegration factor OS=Homo sapiens GN=BANF1 PE=1 SV=1 - [BAF_HUMAN]	0.9551	2	16	19	204	0.907	27	26.1	0.85	26	29.5	2.451	27	49.5	0.87	27	21.1	2.389	27	66.8	2.361	27	58.1	1.595	25	79.8	1.622	24	102.2	1.628	23	105	0.95	26	20.8	0.878	26	20.2	2.059	27	38.3	0.948	26	19.6	1.997	27	27.5	1.732
P00491	Purine nucleoside phosphorylase OS=Homo sapiens GN=PNP PE=1 SV=2 - [PNPH_HUMAN]	0.9827	6	16	35	252	0.995	35	25	1.096	35	13.4	0.593	33	73.2	1.054	35	20.1	0.553	32	82.3	0.564	34	76.9	0.557	29	93	0.526	31	71	0.68	28	81.1	0.983	32	25.7	1.043	32	24.4	0.507	30	80.2	0.992	32	19.6	0.466	27	82.5	0.536
P04040	Catalase OS=Homo sapiens GN=CAT PE=1 SV=3 - [CATA_HUMAN]	0.6983	3	16	40	179	1.014	19	6.2	1.106	19	19.1	0.984	18	40	1.054	19	12.5	0.878	18	58.5	0.849	18	53.5	0.866	16	74.8	0.884	18	50.1	0.867	18	56.3	1.068	18	13.9	1.06	18	12.1	0.894	18	34	1.014	18	13.6	0.713	18	34.2	0.858
P08708	40S ribosomal protein S17 OS=Homo sapiens GN=RPS17 PE=1 SV=2 - [RS17_HUMAN]	0.963	6	16	27	514	1.075	75	16.2	1.103	75	13.8	0.804	72	52.7	1.075	75	13.1	0.716	69	54.8	0.737	71	40.4	0.682	70	56.8	0.755	65	79.9	0.697	69	47.6	1.094	64	18.5	1.126	64	16.6	0.8	62	32.1	1.073	64	17.5	0.701	59	49.9	0.698
P10768	S-formylglutathione hydrolase OS=Homo sapiens GN=ESD PE=1 SV=2 - [ESTD_HUMAN]	0.8475	4	16	23	137	1.12	20	20	1.136	20	12.8	0.643	20	34.7	1.155	20	17.1	0.591	19	70.2	0.725	19	37.1	0.66	19	90.7	0.544	19	71.5	0.577	19	62	1.11	18	17.3	1.085	18	16.1	0.646	17	60.8	1.118	18	15.6	0.636	15	62.8	0.712
P11177-2	Isoform 2 of Pyruvate dehydrogenase E1 component subunit beta, mitochondrial OS=Homo sapiens GN=PDHB - [ODPB_HUMAN]	0.6774	6	16	22	215	1.008	34	33.4	1.01	34	22.8	0.748	34	48.7	1.009	34	26	0.673	34	108.3	0.695	34	87.7	0.56	31	118.4	0.588	32	82.9	0.578	31	77.6	0.957	28	23.5	0.985	28	18.4	0.758	28	59	0.957	28	23.5	0.559	26	67.5	0.719
P17480	Nucleolar transcription factor 1 OS=Homo sapiens GN=UBTF PE=1 SV=1 - [UBF1_HUMAN]	0.7958	8	16	124	716	0.894	19	23.5	0.86	20	13.4	2.223	20	55.1	0.796	19	37.4	2.152	20	45.5	2.112	20	38.1	3.292	20	56.8	3.861	20	66.5	3.707	20	69	0.874	17	29.8	0.886	17	25.1	2.355	18	48.6	0.936	17	32.2	2.703	18	28.6	2.378
P17858	ATP-dependent 6-phosphofructokinase, liver type OS=Homo sapiens GN=PFKL PE=1 SV=6 - [PFKAL_HUMAN]	0.7256	9	16	62	252	1.12	14	18.2	1.067	14	21.1	0.828	14	43.7	1.062	14	23.8	0.686	14	83.2	0.776	14	66.1	0.769	14	86.2	0.773	13	104.7	0.831	14	119.6	1.063	17	19.2	1.041	17	11.9	0.865	17	39.7	1.088	17	10.8	0.753	15	59.1	0.811
P18583-5	Isoform D of Protein SON OS=Homo sapiens GN=SON - [SON_HUMAN]	0.4518	19	16	146	1040	0.868	20	23.5	0.756	20	24.7	2.126	20	31	0.83	20	30.4	2.481	20	52.8	2.054	20	33.9	2.105	20	45.7	1.795	20	31.3	1.74	20	45.8	0.854	16	15.8	0.717	16	29.6	2.168	16	35.4	0.803	16	13.5	2.411	16	38.2	2.33
P20020-6	Isoform K of Plasma membrane calcium-transporting ATPase 1 OS=Homo sapiens GN=ATP2B1 - [AT2B1_HUMAN]	0.5515	27	16	76	308	1.15	13	12.6	0.885	13	11.8	0.753	13	13	0.989	13	10.5	0.776	13	30.7	0.691	13	21.6	0.841	13	42.1	0.746	13	42	0.782	13	48	1.194	12	6.8	0.949	12	14.3	0.681	12	18.2	1.058	12	4	0.722	12	39.1	0.668
P23528	Cofilin-1 OS=Homo sapiens GN=CFL1 PE=1 SV=3 - [COF1_HUMAN]	0.9819	9	16	33	484	1	55	22.8	1.153	55	13.9	0.405	51	69.9	1.079	55	19.5	0.335	47	135.9	0.396	50	87	0.325	43	162.2	0.313	45	116.1	0.296	44	122.8	1.034	55	21.6	1.157	55	9.5	0.448	49	73.2	1.029	55	15.1	0.328	48	79.9	0.436
P23634	Plasma membrane calcium-transporting ATPase 4 OS=Homo sapiens GN=ATP2B4 PE=1 SV=2 - [AT2B4_HUMAN]	0.5842	13	16	86	262	1.124	11	21.5	0.883	11	9.9	0.813	11	61.2	1.02	11	10.7	0.737	11	88.8	0.785	11	36.6	0.682	11	78.2	0.703	11	111	0.555	11	109.5	1.203	12	12.8	0.956	12	10.7	1.083	12	35.8	1.052	11	18.2	1.251	12	69.1	0.975
P24534	Elongation factor 1-beta OS=Homo sapiens GN=EEF1B2 PE=1 SV=3 - [EF1B_HUMAN]	0.7511	5	16	24	312	1.009	40	24.5	1.114	40	14.7	0.667	40	42.8	1.041	40	22.3	0.568	38	69	0.579	40	68.8	0.553	36	80.4	0.491	35	96.9	0.606	37	84.7	1.057	38	20.9	1.138	38	17.6	0.653	36	54.8	1.134	38	19.9	0.556	36	50.2	0.561
P25391	Laminin subunit alpha-1 OS=Homo sapiens GN=LAMA1 PE=1 SV=2 - [LAMA1_HUMAN]	0.545	5	16	166	446	1.05	13	15.6	1.032	13	26.2	0.944	13	40.2	1.039	13	14.6	0.871	12	55.5	1.062	13	36.1	0.897	12	60.3	0.768	12	52.2	0.938	12	70	1.095	8	13.5	0.931	8	17.6	0.967	8	55.6	0.945	8	19	0.953	8	68.9	0.723
P30086	Phosphatidylethanolamine-binding protein 1 OS=Homo sapiens GN=PEBP1 PE=1 SV=3 - [PEBP1_HUMAN]	1	4	16	23	278	1.105	38	16.6	1.175	38	16.7	0.6	37	60.2	1.108	38	13.8	0.595	37	96.4	0.663	38	73.1	0.716	34	100.9	0.716	32	96.3	0.704	33	108.7	1.123	40	14.4	1.2	40	17.3	0.546	40	69.5	1.13	40	15.1	0.542	36	77.3	0.554
P30153	Serine/threonine-protein phosphatase 2A 65 kDa regulatory subunit A alpha isoform OS=Homo sapiens GN=PPP2R1A PE=1 SV=4 - [2AAA_HUMAN]	0.7504	12	16	57	448	1.038	36	26	1.048	37	10.8	0.724	35	38.6	0.986	36	12.3	0.711	31	32.7	0.645	33	42.5	0.631	30	73.3	0.663	28	68.6	0.703	30	57	0.975	36	26	1.067	36	9.2	0.745	35	28.1	1.01	36	19.3	0.724	33	42.5	0.725
P30566	Adenylosuccinate lyase OS=Homo sapiens GN=ADSL PE=1 SV=2 - [PUR8_HUMAN]	0.9008	25	16	50	208	1.144	20	24.2	1.138	19	16.5	0.634	18	48.5	1.049	20	18.2	0.539	17	44.2	0.668	18	51.4	0.659	18	35.5	0.651	18	67.1	0.6	16	69.6	1.108	16	15.4	1.114	16	13.5	0.579	15	50.3	1.06	16	16.2	0.584	15	71.7	0.691
P31947	14-3-3 protein sigma OS=Homo sapiens GN=SFN PE=1 SV=1 - [1433S_HUMAN]	0.8065	3	16	32	299	1.037	20	10.9	1.182	21	11.9	0.57	21	31.2	1.044	21	20.8	0.445	20	63.1	0.56	20	39.9	0.457	20	59.3	0.633	19	103.9	0.501	19	82	1.044	27	19.7	1.187	27	13.1	0.608	26	42.7	1.059	27	21.9	0.566	26	89.4	0.597
P38159	RNA-binding motif protein, X chromosome OS=Homo sapiens GN=RBMX PE=1 SV=3 - [RBMX_HUMAN]	0.954	13	16	83	1044	0.825	36	28.5	0.733	35	23.5	2.79	36	62.4	0.747	36	23.5	3.422	36	72.9	3.06	36	65.3	2.936	36	71	2.738	35	75	3.104	36	92.4	0.822	37	26.1	0.78	37	31.6	2.74	37	39.2	0.764	37	22.7	3.127	37	48.8	2.968
P48047	ATP synthase subunit O, mitochondrial OS=Homo sapiens GN=ATP5O PE=1 SV=1 - [ATPO_HUMAN]	0.8357	4	16	22	195	0.964	27	21.8	1.016	27	12.9	0.758	27	52.9	0.986	27	14.1	0.544	26	104.4	0.585	27	48	0.587	25	78.4	0.49	25	81.1	0.473	21	68.3	0.976	27	21.8	1.047	27	12.1	0.771	27	66.9	1.052	27	20.8	0.514	24	84.1	0.626
P48735	Isocitrate dehydrogenase [NADP], mitochondrial OS=Homo sapiens GN=IDH2 PE=1 SV=2 - [IDHP_HUMAN]	0.7655	6	16	37	154	0.917	15	22.2	1.001	15	12.2	0.743	15	87.3	0.94	15	8.7	0.896	13	74.8	0.751	14	61.5	0.56	12	76.4	0.672	12	111.3	0.571	12	43.2	0.976	11	22.7	1.052	11	15.3	0.865	11	39.7	0.991	11	7.6	0.685	11	54.2	0.62
P53992	Protein transport protein Sec24C OS=Homo sapiens GN=SEC24C PE=1 SV=3 - [SC24C_HUMAN]	0.5393	6	16	49	182	1.033	14	13.8	0.937	14	25.8	0.906	14	43.7	1.045	14	11.9	0.959	14	55.3	0.944	14	58.1	0.726	13	103.2	0.785	13	54.9	0.733	12	145.3	0.999	13	15.7	1.008	13	16.5	0.939	13	44.4	0.967	13	14.6	0.713	13	64.8	0.786
P55327-3	Isoform 3 of Tumor protein D52 OS=Homo sapiens GN=TPD52 - [TPD52_HUMAN]	0.8508	11	16	28	153	1.069	21	12.4	1.095	21	11.4	0.697	21	51.5	1.091	21	10.1	0.638	21	66.7	0.654	21	63.7	0.778	20	73.2	0.824	20	75	0.724	21	79.9	1.015	19	23.6	1.166	19	20.5	0.689	19	67.5	1.068	19	22.9	0.564	18	88.9	0.571
P61289-2	Isoform 2 of Proteasome activator complex subunit 3 OS=Homo sapiens GN=PSME3 - [PSME3_HUMAN]	0.7566	14	16	40	261	1.037	34	19.3	1.159	33	10.4	0.691	31	62.8	1.062	34	19.2	0.703	28	68.3	0.734	30	37.9	0.869	26	78.3	0.782	26	106.9	0.69	26	109.7	1.078	32	17.2	1.091	32	14.3	0.847	30	54.3	1.065	32	12.8	0.644	28	129.5	0.661
P62495	Eukaryotic peptide chain release factor subunit 1 OS=Homo sapiens GN=ETF1 PE=1 SV=3 - [ERF1_HUMAN]	0.7048	6	16	37	153	0.986	16	15.4	1.052	16	16.5	0.677	16	62.6	1.027	16	16.5	0.574	16	47.7	0.694	16	41.7	0.544	16	76.9	0.568	16	70.4	0.651	14	63.2	1.044	18	21.3	1.107	18	21.7	0.816	17	37.1	1.064	18	21.1	0.698	18	40.6	0.781
P62888	60S ribosomal protein L30 OS=Homo sapiens GN=RPL30 PE=1 SV=2 - [RL30_HUMAN]	1	5	16	26	420	1.02	52	15.1	1.032	52	13.3	1.021	51	41	1.015	52	14	1.159	51	41.6	1.055	52	42.9	1.501	51	37.9	1.628	50	59.8	1.555	52	52.5	1.011	48	14.8	1.028	48	18.3	1.185	48	43.5	1.013	48	15.4	1.275	47	32.7	1.174
P62913	60S ribosomal protein L11 OS=Homo sapiens GN=RPL11 PE=1 SV=2 - [RL11_HUMAN]	0.9719	5	16	33	250	1.066	33	12.8	1.077	33	12.3	1.034	33	58.4	1.048	33	13.5	1.186	33	56.7	1.027	33	52.8	1.383	33	59.6	1.387	33	67.2	1.411	33	56.4	1.054	25	18.4	1.089	25	12.5	1.009	25	57.3	1.052	25	19	1.036	25	77.2	1.099
P63241-2	Isoform 2 of Eukaryotic translation initiation factor 5A-1 OS=Homo sapiens GN=EIF5A - [IF5A1_HUMAN]	0.9457	9	16	24	448	1.004	70	15.6	1.102	71	12.1	0.759	67	30.7	1.041	69	16.1	0.638	68	66.8	0.694	68	43.6	0.485	66	153.2	0.495	60	121.6	0.507	62	127.9	0.986	62	25.2	1.083	62	16.6	0.734	59	40.5	1.018	62	17.1	0.617	57	67.4	0.669
Q00688	Peptidyl-prolyl cis-trans isomerase FKBP3 OS=Homo sapiens GN=FKBP3 PE=1 SV=1 - [FKBP3_HUMAN]	0.8125	3	16	28	145	0.933	17	21.1	1.108	17	11.9	0.774	17	46.5	1.006	17	9.8	0.757	17	56.8	0.737	17	38.4	0.699	17	47.9	0.67	16	58.3	0.631	17	59.2	0.968	17	17.4	1.146	17	7.2	0.777	17	55.5	1.01	17	15	0.704	17	49.3	0.786
Q06787-2	Isoform 1 of Synaptic functional regulator FMR1 OS=Homo sapiens GN=FMR1 - [FMR1_HUMAN]	0.7239	31	16	59	200	1.082	11	27.3	1.092	11	14.1	0.748	11	27.5	1.028	11	19.2	0.642	11	43.1	0.621	11	70.6	0.675	11	74.6	0.581	11	109.9	0.573	10	76.6	1.046	12	16.4	1.027	12	11	0.764	12	39.9	1.044	12	12.6	0.582	11	54.3	0.766
Q08257	Quinone oxidoreductase OS=Homo sapiens GN=CRYZ PE=1 SV=1 - [QOR_HUMAN]	0.7386	5	16	30	179	1.061	23	14.4	1.116	23	8.6	0.653	23	57.9	1.08	23	15.7	0.69	22	130.7	0.621	22	65.7	0.47	22	87.6	0.395	20	122.3	0.344	21	104.9	0.989	20	22.1	1.073	20	9.5	0.676	20	70.5	0.992	20	14	0.79	19	73.9	0.77
Q12830	Nucleosome-remodeling factor subunit BPTF OS=Homo sapiens GN=BPTF PE=1 SV=3 - [BPTF_HUMAN]	0.521	13	16	200	556	0.972	13	29	0.761	12	38.7	2.586	12	29.6	0.849	13	33.8	3.303	13	54.8	2.781	13	47.7	2.843	13	58.2	2.667	12	23.6	2.317	12	51.3	0.953	9	14.5	0.812	9	16.3	1.982	9	36.6	0.988	9	19.6	2.556	9	46.2	2.104
Q14914	Prostaglandin reductase 1 OS=Homo sapiens GN=PTGR1 PE=1 SV=2 - [PTGR1_HUMAN]	0.8571	6	16	35	172	0.958	19	17.5	1.062	19	11.2	0.598	19	35.3	1.047	19	12.2	0.471	18	87.6	0.615	19	44.3	0.502	19	60.4	0.55	18	72.7	0.616	18	74.5	1.021	18	15.1	1.129	18	11.3	0.743	18	49.4	1.044	18	15.5	0.534	17	58.3	0.81
Q15057	Arf-GAP with coiled-coil, ANK repeat and PH domain-containing protein 2 OS=Homo sapiens GN=ACAP2 PE=1 SV=3 - [ACAP2_HUMAN]	0.7442	6	16	72	232	1.089	12	19.2	1.054	12	13.2	0.764	10	86.8	1.092	12	16.6	0.935	11	46.2	0.778	10	81.2	0.694	9	194.3	0.892	8	44.3	0.776	9	154.6	0.992	14	18.3	1.044	14	18.3	0.635	14	116.2	1.123	14	21.3	0.615	14	60.8	0.682
Q15067-2	Isoform 2 of Peroxisomal acyl-coenzyme A oxidase 1 OS=Homo sapiens GN=ACOX1 - [ACOX1_HUMAN]	0.6773	12	16	38	163	1.061	13	8.8	1.11	13	16.3	0.857	13	49.4	1.151	13	18.1	0.759	12	80.3	0.805	13	54.4	0.64	12	104.5	0.559	10	84	0.51	11	85.9	0.887	18	23.3	0.922	18	16.2	0.846	18	45.9	1.081	18	27.2	0.738	18	43	0.676
Q15293	Reticulocalbin-1 OS=Homo sapiens GN=RCN1 PE=1 SV=1 - [RCN1_HUMAN]	0.7613	5	16	29	258	0.966	27	24.2	1.116	27	9.7	0.693	26	77.2	1.124	27	19.1	0.531	25	175	0.566	25	87.2	0.461	24	201.2	0.373	21	155.9	0.499	22	134	0.967	33	23.7	1.123	33	13.8	0.589	33	72	1.033	33	20.6	0.552	33	101.6	0.551
Q16576	Histone-binding protein RBBP7 OS=Homo sapiens GN=RBBP7 PE=1 SV=1 - [RBBP7_HUMAN]	0.7106	10	16	31	360	0.91	43	17.3	0.925	43	13.8	1.366	43	40.2	0.928	43	19	1.342	43	53.7	1.311	43	57.7	1.13	43	60.9	1.112	43	51.9	1.157	42	58.6	0.92	38	19.4	0.933	38	11.1	1.408	38	42.8	0.9	38	15.4	1.5	38	51.6	1.266
Q16719	Kynureninase OS=Homo sapiens GN=KYNU PE=1 SV=1 - [KYNU_HUMAN]	0.6645	12	16	29	146	1.038	20	23.4	1.088	20	10.6	0.546	19	114.5	1.08	20	6.8	0.535	18	150.3	0.616	18	118.2	0.413	19	178.3	0.511	17	79.5	0.576	18	231.3	1.1	19	19.7	1.184	19	14.3	0.693	17	51.3	1.038	19	26.6	0.605	17	109	0.69
Q4G0J3	La-related protein 7 OS=Homo sapiens GN=LARP7 PE=1 SV=1 - [LARP7_HUMAN]	0.768	18	16	74	216	0.913	11	29.1	0.956	11	24.3	1.471	11	34	1.023	11	21	1.669	11	44.4	1.645	11	37.5	2.164	11	54	1.89	11	59.8	2.029	11	51.4	0.949	12	14.8	1.008	12	7.8	1.197	12	55.4	1.021	12	13.7	1.305	12	66.8	1.598
Q5JY65	Crooked neck-like protein 1 OS=Homo sapiens GN=CRNKL1 PE=1 SV=1 - [Q5JY65_HUMAN]	0.6962	6	16	84	235	0.942	12	35	0.812	12	22.3	2.089	12	36.5	0.871	12	18.9	2.375	12	66.3	2.414	12	35.7	1.909	12	68.9	1.698	11	60.1	1.537	12	67.9	0.794	15	24.4	0.757	15	13.9	2.137	15	20.5	0.858	14	21.8	2.203	15	39.8	1.905
Q6NUK1	Calcium-binding mitochondrial carrier protein SCaMC-1 OS=Homo sapiens GN=SLC25A24 PE=1 SV=2 - [SCMC1_HUMAN]	0.652	4	16	39	155	0.975	14	11.5	0.959	14	13.3	0.821	14	37.6	0.955	14	19.1	0.492	14	108	0.729	14	59.6	0.433	14	152.5	0.582	13	77.3	0.567	14	111	0.971	14	5.7	0.919	14	5.3	0.829	14	41.5	1.005	14	11.3	0.698	14	62	0.77
Q6YN16	Hydroxysteroid dehydrogenase-like protein 2 OS=Homo sapiens GN=HSDL2 PE=1 SV=1 - [HSDL2_HUMAN]	0.7919	5	16	43	211	1.104	19	12.7	1.06	19	12.8	0.676	19	41.4	1.093	19	17.8	0.537	18	27.5	0.616	19	42.8	0.423	17	59.7	0.371	18	65.1	0.43	17	71.5	1.025	18	12.5	1.038	18	14.8	0.667	18	26.2	1.045	18	13.7	0.449	18	57.8	0.49
Q71RC2	La-related protein 4 OS=Homo sapiens GN=LARP4 PE=1 SV=3 - [LARP4_HUMAN]	0.5414	17	16	49	205	1.108	15	22.9	1.072	15	19.7	0.931	15	81.3	1.124	15	30	0.687	15	60.5	0.75	15	48.9	0.672	14	76.4	0.607	15	43.2	0.47	15	50.6	1.013	19	18.6	1.044	19	9.7	0.798	19	43	1.043	19	16.7	0.819	19	81.7	0.781
Q8NHQ9	ATP-dependent RNA helicase DDX55 OS=Homo sapiens GN=DDX55 PE=1 SV=3 - [DDX55_HUMAN]	0.7367	6	16	50	192	0.933	18	19.2	0.851	18	18.7	1.491	18	33.3	0.91	18	19.7	1.758	18	41.8	1.707	18	23.9	2.184	18	71.2	1.783	18	81.6	1.746	18	70.6	0.913	15	29.4	0.929	15	33.8	1.487	15	22.3	0.937	15	21.6	1.85	15	29.2	1.665
Q8TAT6-2	Isoform 2 of Nuclear protein localization protein 4 homolog OS=Homo sapiens GN=NPLOC4 - [NPL4_HUMAN]	0.7066	5	16	46	157	0.98	11	18.1	1.07	11	12.8	0.762	11	34.5	1.121	11	20.7	0.711	11	40	0.73	11	33	0.669	9	83.1	0.706	9	30.5	0.418	9	113.5	1.018	16	16.3	1.092	16	9.6	0.75	16	36.8	1.019	16	26.6	0.757	16	54.9	0.799
Q8TCG1	Protein CIP2A OS=Homo sapiens GN=KIAA1524 PE=1 SV=2 - [CIP2A_HUMAN]	0.6785	5	16	76	209	1.059	8	17.4	1.083	8	35.2	0.914	6	28.6	0.96	7	15.5	0.745	6	23.4	0.732	5	71.3	1.128	5	31.1	0.921	6	43.8	0.602	5	31.6	1.183	13	20	1.091	13	23.3	1.009	12	36.3	1.026	13	13.3	0.821	10	97	0.899
Q8WXX5	DnaJ homolog subfamily C member 9 OS=Homo sapiens GN=DNAJC9 PE=1 SV=1 - [DNJC9_HUMAN]	0.8115	2	16	29	180	0.923	25	15.9	1.013	25	8.5	1.524	25	34.2	0.89	25	12.8	1.883	25	39.8	1.643	25	32.4	1.527	25	59.7	1.488	24	50.3	1.57	25	38.5	0.958	24	19.9	0.956	24	13.2	1.603	24	38	0.962	24	15.6	1.974	24	46	1.646
Q92793	CREB-binding protein OS=Homo sapiens GN=CREBBP PE=1 SV=3 - [CBP_HUMAN]	0.4672	19	16	117	386	0.878	12	14.8	0.85	12	33.3	2.018	12	30.7	0.87	12	21.8	2.565	12	65.1	2.359	11	41.5	1.916	11	32.8	1.853	12	50.5	1.815	11	30.1	0.907	11	23	0.832	11	34.3	1.886	11	55.8	0.91	11	28.5	2.069	11	45.9	1.97
Q96A33	Coiled-coil domain-containing protein 47 OS=Homo sapiens GN=CCDC47 PE=1 SV=1 - [CCD47_HUMAN]	0.6605	4	16	43	179	1.084	15	29.8	0.968	14	18	1.352	14	32.8	1.071	15	30.1	1.253	15	43	1.376	15	26.2	1.239	14	71.3	1.102	14	90.4	1.109	14	76.8	0.959	14	11.9	0.884	14	20.5	1.128	12	43.7	0.888	13	16.1	0.966	13	61	1.046
Q96CT7	Coiled-coil domain-containing protein 124 OS=Homo sapiens GN=CCDC124 PE=1 SV=1 - [CC124_HUMAN]	0.7489	2	16	31	172	0.966	19	16	0.982	19	20.9	1.078	16	74.7	1.04	18	27.8	1.159	14	52.2	1.165	17	38	0.882	14	146.3	0.816	13	179.5	0.92	14	80.2	1.019	14	14.8	1.047	15	10.4	0.881	15	87.3	1.033	15	19.2	0.567	14	103	0.744
Q96D46	60S ribosomal export protein NMD3 OS=Homo sapiens GN=NMD3 PE=1 SV=1 - [NMD3_HUMAN]	0.8211	9	16	48	181	1.063	14	15.8	0.981	13	18.8	0.907	14	19.7	1.011	14	18	0.908	13	24	0.89	13	28.2	0.969	13	46	0.695	13	51.9	0.756	13	48.8	1.058	13	9.7	0.975	13	15.5	0.868	13	31.7	1.049	13	12.7	0.823	13	41	0.912
Q96F86	Enhancer of mRNA-decapping protein 3 OS=Homo sapiens GN=EDC3 PE=1 SV=1 - [EDC3_HUMAN]	0.7224	10	16	35	145	0.979	14	10.9	1.043	14	11.4	0.575	14	107.8	1.05	14	19	0.634	14	72.9	0.679	14	67.4	0.678	13	99.4	0.737	13	87	0.672	13	101.3	1.02	10	11.1	1.08	10	9.9	0.677	10	71.9	0.999	10	18.7	0.632	10	81.8	0.7
Q96QE3	ATPase family AAA domain-containing protein 5 OS=Homo sapiens GN=ATAD5 PE=1 SV=4 - [ATAD5_HUMAN]	0.7175	4	16	166	443	1.031	7	13.7	0.95	7	33	2.142	7	17.9	0.999	7	21.2	2.416	7	37.6	1.947	7	43.8	2.48	7	44.9	2.702	7	56.2	1.952	7	47.3	0.974	11	15.7	0.934	11	34.2	2.161	11	46.8	0.957	11	29.2	1.819	11	44.9	1.791
Q99598	Translin-associated protein X OS=Homo sapiens GN=TSNAX PE=1 SV=1 - [TSNAX_HUMAN]	0.9345	7	16	31	139	0.951	12	22.4	1.067	12	10.5	1.117	11	68.1	1.038	12	21.6	0.951	11	87.7	0.874	12	43.9	1.059	11	72.9	1.15	11	108	1.107	11	83.1	1.034	15	12.9	1.099	15	8.1	0.853	14	45	1.044	15	14.1	0.944	13	61.1	0.817
Q99961	Endophilin-A2 OS=Homo sapiens GN=SH3GL1 PE=1 SV=1 - [SH3G1_HUMAN]	0.6386	9	16	33	180	1.11	21	28.7	1.159	21	11.4	0.706	21	43.4	1.17	21	21.8	0.686	19	48.8	0.792	20	37.1	0.783	18	111.6	0.703	19	85.4	0.949	18	69.6	1.023	22	16.5	1.207	22	19.9	0.692	21	48.6	1.032	22	14.3	0.687	21	55.2	0.81
Q9BTY7	Protein HGH1 homolog OS=Homo sapiens GN=HGH1 PE=1 SV=1 - [HGH1_HUMAN]	0.641	5	16	19	114	1.115	14	13.3	1.106	14	7.6	0.853	12	27.4	1.132	15	10.7	0.869	11	46.4	0.917	12	23.5	0.981	11	42.8	0.976	10	39.6	0.881	11	49.9	1.036	15	14.9	1.104	15	34.4	1.028	14	79.3	1.006	15	18.3	0.968	13	93.1	0.976
Q9BV20	Methylthioribose-1-phosphate isomerase OS=Homo sapiens GN=MRI1 PE=1 SV=1 - [MTNA_HUMAN]	0.7371	2	16	30	153	1.082	22	21.8	1.097	22	12.7	0.82	22	57.8	1.101	22	29.8	0.724	21	78.3	0.827	21	77.6	1.299	21	127.8	0.726	21	67.8	0.895	20	95.3	1.121	21	17.2	1.054	21	15.3	0.727	19	62.7	1.088	21	21	0.718	19	38.6	0.77
Q9BXY0	Protein MAK16 homolog OS=Homo sapiens GN=MAK16 PE=1 SV=2 - [MAK16_HUMAN]	0.84	10	16	37	241	0.8	25	39.2	0.765	26	44	2.392	27	47.9	0.908	26	38.5	2.746	26	68.3	2.553	27	59.5	4.869	27	104.4	4.399	27	81.3	4.852	27	98.8	1.005	25	31	0.873	25	37.5	2.747	25	58.2	0.863	24	37.2	3.512	25	54.9	2.575
Q9C0B1	Alpha-ketoglutarate-dependent dioxygenase FTO OS=Homo sapiens GN=FTO PE=1 SV=3 - [FTO_HUMAN]	0.7485	17	16	40	109	0.994	12	30	1.114	12	13.5	0.737	11	69.8	1.034	12	23.4	0.704	10	55.2	0.736	10	24.4	0.955	9	50.3	0.765	9	35.1	0.824	10	123.9	1.067	11	15.3	1.126	11	13.6	0.673	10	44.5	1.139	11	12.5	0.594	9	56.8	0.61
Q9GZS3	WD repeat-containing protein 61 OS=Homo sapiens GN=WDR61 PE=1 SV=1 - [WDR61_HUMAN]	0.7377	8	16	21	161	0.997	22	19.8	1.016	22	11.8	1.005	22	46.1	1.055	22	21.3	0.898	21	74.7	0.965	22	55.3	0.902	22	61.9	0.87	21	69.6	0.863	21	65.6	0.922	24	22.4	0.959	24	11	0.959	23	52.9	0.998	24	25.1	0.932	24	48	1.022
Q9H1A4	Anaphase-promoting complex subunit 1 OS=Homo sapiens GN=ANAPC1 PE=1 SV=1 - [APC1_HUMAN]	0.535	4	16	91	279	1.043	11	17.5	1.016	11	24	1.191	11	97.6	1.046	11	16.8	1.425	11	56.7	1.26	11	84.5	1.142	11	78.9	1.066	11	108.6	1.219	11	101.4	1.044	16	11	0.948	16	11.5	1.302	16	65.5	1.096	16	21.3	1.717	16	128.3	1.649
Q9H3S7	Tyrosine-protein phosphatase non-receptor type 23 OS=Homo sapiens GN=PTPN23 PE=1 SV=1 - [PTN23_HUMAN]	0.4859	6	16	91	253	1.047	14	10.6	0.985	14	11.9	0.986	14	45	1.036	14	11.4	0.917	14	56.1	1.108	14	53.1	1.151	14	87.9	0.966	14	60.8	1.118	14	91.9	0.943	6	15.1	0.912	6	11.8	1.234	6	41.7	0.966	6	14.3	1.332	6	49.1	1.33
Q9NYH9	U3 small nucleolar RNA-associated protein 6 homolog OS=Homo sapiens GN=UTP6 PE=2 SV=2 - [UTP6_HUMAN]	0.7655	8	16	55	196	0.698	15	37.2	0.751	15	54.1	1.657	17	23.7	0.794	15	45	2.409	17	29.7	2.178	17	34.5	2.445	17	82.1	2.827	16	63	2.605	16	81.1	0.716	16	41.8	0.717	15	25.8	1.382	16	32.3	0.644	15	44.9	2.154	16	54.9	2.245
Q9NZL4	Hsp70-binding protein 1 OS=Homo sapiens GN=HSPBP1 PE=1 SV=1 - [HPBP1_HUMAN]	0.7597	8	16	29	204	0.994	20	28.5	1.046	20	6.4	0.757	19	37.3	1.101	20	13.8	0.86	19	52.5	0.775	19	28	0.806	19	127	0.907	20	67.3	0.94	18	114.4	0.943	20	18.7	1.023	19	12.6	0.725	18	37.3	0.937	19	22.1	0.662	19	67	0.718
Q9P031	Thyroid transcription factor 1-associated protein 26 OS=Homo sapiens GN=CCDC59 PE=1 SV=2 - [TAP26_HUMAN]	0.7884	2	16	27	110	1.055	8	11.6	0.905	8	25.2	2.337	8	30.9	1.007	8	15	2.36	8	46.4	2.059	8	29.1	3.18	8	49.8	3.257	8	42.8	3.926	8	47.1	0.861	12	29.5	0.877	12	52.5	2.095	12	32.2	0.768	12	54.8	2.659	12	59.1	2.487
Q9P2N5	RNA-binding protein 27 OS=Homo sapiens GN=RBM27 PE=1 SV=2 - [RBM27_HUMAN]	0.5943	5	16	78	247	0.93	13	18.2	0.898	13	15.2	1.853	14	69.5	0.872	14	12.1	1.879	14	53.6	1.678	14	70.6	1.891	13	49.3	1.681	14	58.5	1.779	13	67.8	0.877	14	12.5	0.906	15	17.7	1.412	15	28.5	0.861	14	20.4	1.752	15	20.2	1.642
Q9UNZ2-5	Isoform 3 of NSFL1 cofactor p47 OS=Homo sapiens GN=NSFL1C - [NSF1C_HUMAN]	0.7204	8	16	30	127	1.031	15	22.5	1.13	15	8.5	0.779	15	37.5	1.091	15	9.7	0.726	14	33.8	0.761	15	36.4	0.791	14	23	0.941	13	52.4	0.907	14	32.9	1.053	17	12.9	1.25	17	10.7	0.644	17	57.4	1.128	17	12.6	0.574	16	107.6	0.609
Q9Y221	60S ribosome subunit biogenesis protein NIP7 homolog OS=Homo sapiens GN=NIP7 PE=1 SV=1 - [NIP7_HUMAN]	0.9556	6	16	20	230	0.911	39	26	0.878	37	26.6	1.603	39	65.4	0.863	39	30.7	1.967	38	77.8	1.575	39	65.8	2.524	39	109.6	2.431	39	79.7	2.235	38	101.3	0.903	36	36.6	0.865	36	36.7	1.535	36	85.9	0.966	36	26.9	2.012	36	62.4	1.521
Q9Y295	Developmentally-regulated GTP-binding protein 1 OS=Homo sapiens GN=DRG1 PE=1 SV=1 - [DRG1_HUMAN]	0.8093	5	16	31	159	1.13	22	12.1	1.073	22	10.1	0.616	21	54.2	1.133	22	11.1	0.639	20	50.3	0.55	21	64.6	0.564	19	78.5	0.553	19	51.8	0.751	18	81.3	1.09	19	16.2	1.169	19	17.2	0.728	19	32.9	1.127	19	19.4	0.593	19	39.2	0.683
Q9Y3A4	Ribosomal RNA-processing protein 7 homolog A OS=Homo sapiens GN=RRP7A PE=1 SV=2 - [RRP7A_HUMAN]	0.7179	3	16	29	206	0.929	31	30.4	0.785	31	52.4	1.985	31	44.9	0.95	31	29.7	2.219	30	51.7	1.976	30	52	2.83	31	66.8	2.889	31	69.7	3.452	31	94.9	0.926	31	41.5	0.902	32	36.8	2.026	32	54.7	0.891	32	44.1	2.423	32	69.2	2.013
Q9Y5Q8-2	Isoform 2 of General transcription factor 3C polypeptide 5 OS=Homo sapiens GN=GTF3C5 - [TF3C5_HUMAN]	0.5992	10	16	39	138	0.922	16	17.3	0.909	16	16.6	1.572	16	32.5	0.851	16	19.6	1.569	16	57.1	1.549	16	39.9	1.442	16	84	1.445	16	101.8	1.319	16	102.4	0.884	14	25.1	0.814	14	25.3	1.613	14	27.9	0.915	14	33.8	1.58	14	37.6	1.613
Q9Y6Y8	SEC23-interacting protein OS=Homo sapiens GN=SEC23IP PE=1 SV=1 - [S23IP_HUMAN]	0.46	8	16	58	204	1.061	14	16.8	1.131	14	16.2	0.833	14	48.8	1.155	14	16.3	0.704	13	49.4	0.685	14	50.9	0.645	13	63.4	0.833	12	46.6	0.749	13	69.3	1.025	18	18.8	1.046	18	15.2	0.777	18	42.9	1.037	18	20	0.745	17	42.7	0.784
D3DXC9	Serine hydroxymethyltransferase OS=Homo sapiens GN=SHMT1 PE=3 SV=1 - [D3DXC9_HUMAN]	0.7928	13	16	42	146	1.016	15	35.3	1.087	15	10.4	0.811	15	67.8	1.043	15	26.6	0.681	15	72.5	0.778	15	45.5	0.682	13	25.3	0.645	13	28.1	0.72	12	38.5	0.959	17	22.4	1.037	17	13.8	0.94	17	35	0.948	17	18.2	0.893	17	51	1.013
B0QZ18	Copine-1 OS=Homo sapiens GN=CPNE1 PE=1 SV=1 - [B0QZ18_HUMAN]	0.5498	19	16	35	151	1.055	22	25.9	1.023	21	15.4	1.061	19	39.7	0.997	21	22.9	1.065	18	82	1.062	20	46.9	0.933	18	69.2	1.078	16	85.9	1.022	17	94.8	0.967	18	22.3	0.987	19	16.9	1.271	17	40.7	0.986	19	22.4	1.449	18	61.1	1.286
J3KPP4	Cisplatin resistance-associated overexpressed protein, isoform CRA_b OS=Homo sapiens GN=LUC7L3 PE=1 SV=1 - [J3KPP4_HUMAN]	0.6401	22	16	55	206	0.678	18	21.8	0.646	17	28.6	2.509	18	32.3	0.676	18	11.7	2.547	18	51.5	2.506	18	36	1.927	18	66.7	1.922	17	58.4	2.25	18	111.1	0.744	22	25	0.663	21	32.4	2.317	22	47.9	0.643	22	40.8	2.549	22	51.3	2.398
J3QQ67	60S ribosomal protein L18 (Fragment) OS=Homo sapiens GN=RPL18 PE=1 SV=1 - [J3QQ67_HUMAN]	0.8316	10	16	29	212	1.046	29	28	0.969	29	16.6	0.9	29	90.2	0.941	29	23.6	1.041	28	89.1	1.102	28	58.3	0.784	26	116.1	0.766	22	96.5	0.826	26	99.7	1.075	29	28.7	0.92	29	17.8	0.819	28	83	0.984	28	17.8	0.993	27	87.5	1.04
B7ZLW8	5-methyltetrahydrofolate-homocysteine methyltransferase OS=Homo sapiens GN=MTR PE=2 SV=1 - [B7ZLW8_HUMAN]	0.6063	7	16	69	181	1.003	6	16.8	1.049	6	17.1	1.118	5	12	1.157	6	16	1.062	5	9.7	1.233	5	7.2	0.974	5	52.3	0.861	5	99.9	0.814	5	110.8	0.995	9	16.3	1.086	9	19	1.017	8	13.4	0.938	9	8	0.873	8	41.3	0.832
B2RAN0	cDNA, FLJ95010, highly similar to Homo sapiens Bloom syndrome (BLM), mRNA OS=Homo sapiens PE=2 SV=1 - [B2RAN0_HUMAN]	0.669	8	16	112	334	0.835	8	13.2	0.83	8	14.1	1.557	8	49.7	0.823	8	14.4	2.023	8	27.9	1.769	8	31.3	2.222	7	50.3	1.822	7	26.1	1.877	7	22.3	1.006	11	12.4	0.946	11	24.2	1.821	11	28.2	0.951	11	31.2	2.158	11	33.4	1.959
B2R774	cDNA, FLJ93313, highly similar to Homo sapiens lectin, mannose-binding, 1 (LMAN1), mRNA OS=Homo sapiens PE=2 SV=1 - [B2R774_HUMAN]	0.6039	5	16	34	177	0.94	15	13.9	0.879	15	25.9	1.117	16	34.9	0.943	15	13.6	1.021	15	39.3	1.082	15	23.2	1.088	15	41.6	1.003	15	54.2	1.011	15	65.8	0.939	16	15.9	0.963	16	22.3	1.066	16	26.1	0.969	16	15	1.02	16	50.3	1.046
B3KY42	cDNA FLJ46788 fis, clone TRACH3028855, highly similar to Pseudouridylate synthase 7 homolog (EC 5.4.99.-) OS=Homo sapiens PE=2 SV=1 - [B3KY42_HUMAN]	0.8215	6	16	52	210	0.987	16	22.2	1.102	16	20.8	0.527	16	52.1	0.992	16	15	0.475	14	55.4	0.386	15	92.7	0.498	12	59.3	0.703	11	28.5	0.6	12	43.5	0.976	19	14.2	1.107	19	12.6	0.492	19	45.8	0.949	19	17.1	0.561	17	58	0.559
A0A024RD36	Ribosomal protein L7-like 1, isoform CRA_b OS=Homo sapiens GN=RPL7L1 PE=4 SV=1 - [A0A024RD36_HUMAN]	0.7216	8	16	34	175	0.905	15	25.9	0.758	16	23	1.621	15	36.8	0.724	16	29.4	1.947	15	74.9	1.945	16	66.9	3.387	15	121.5	2.1	15	81.4	2.765	15	94.2	0.957	16	29.8	0.866	15	23.1	1.481	16	28	0.882	15	35.6	2.183	15	55.3	1.765
A0A0C4DFX9	Negative elongation factor A OS=Homo sapiens GN=NELFA PE=1 SV=1 - [A0A0C4DFX9_HUMAN]	0.6642	15	16	42	177	0.968	16	21.6	0.88	15	16.2	1.581	15	28.8	0.919	15	28.1	1.552	14	16	1.385	15	13.7	1.466	15	28	1.507	14	64	1.355	15	33.2	0.974	13	16.5	1.013	13	25.7	1.506	13	22.5	1.039	14	17.5	1.463	13	26.1	1.365
A0A024R102	SWI/SNF related, matrix associated, actin dependent regulator of chromatin, subfamily d, member 1, isoform CRA_e OS=Homo sapiens GN=SMARCD1 PE=4 SV=1 - [A0A024R102_HUMAN]	0.6604	11	16	47	213	0.781	17	22.6	0.764	17	36.6	1.971	17	64.8	0.767	17	24.9	2.444	17	69.9	1.947	17	74	2.152	17	73.4	1.892	17	74.9	1.95	17	74.9	0.8	17	18.4	0.78	17	30.5	2.287	17	37.7	0.77	17	19.4	2.532	17	43.7	2.1
A0A0A0MT33	Protein SCAF8 OS=Homo sapiens GN=SCAF8 PE=1 SV=1 - [A0A0A0MT33_HUMAN]	0.4529	9	16	80	272	0.972	14	20.2	0.934	14	21.4	1.662	14	31.1	0.957	14	17.3	1.896	14	36.5	1.498	14	31.7	1.407	13	64.7	1.305	13	32.6	1.189	13	49.7	0.947	14	14.6	0.96	14	10.8	1.73	13	49	0.835	14	26.9	1.684	14	57.2	1.481
A0A024R468	Chondroitin polymerizing factor, isoform CRA_d OS=Homo sapiens GN=CHPF PE=4 SV=1 - [A0A024R468_HUMAN]	0.4995	7	16	47	141	0.968	9	5.7	1.11	9	8.6	1.062	9	30.6	1.112	9	19.7	0.988	9	12.9	1.102	9	29.3	1.058	9	20.1	1.168	9	28.4	1.3	9	20.6	0.963	15	7.8	1.042	15	16.7	0.901	15	15.7	1.047	15	14.7	0.898	15	11.3	1.006
A0A0G2JK23	Large proline-rich protein BAG6 OS=Homo sapiens GN=BAG6 PE=1 SV=1 - [A0A0G2JK23_HUMAN]	0.4417	23	16	53	232	1.087	12	17.9	1.192	12	10.3	0.922	11	68	1.051	12	12.2	0.775	11	72.1	0.867	11	54.3	0.841	11	112.8	0.7	11	269.6	0.903	11	123	1.038	17	19.2	1.086	17	13.9	0.789	17	70	1.094	17	16.1	0.763	16	50.7	0.739
A0A024QZR3	Protein pelota homolog OS=Homo sapiens GN=hCG_2002731 PE=3 SV=1 - [A0A024QZR3_HUMAN]	0.8623	3	16	40	204	0.935	19	22.3	0.979	19	23.2	1.628	18	30	0.965	19	16.1	1.712	19	42	1.544	18	40.8	1.879	17	50	1.731	18	44.8	1.462	18	41.3	1.03	17	38	1.021	17	14	1.495	17	41.5	0.997	17	20.5	1.447	16	36.2	1.591
A0A1B0GV23	Cathepsin D OS=Homo sapiens GN=CTSD PE=1 SV=1 - [A0A1B0GV23_HUMAN]	0.8054	16	16	30	136	1.066	18	23.5	1.055	18	10.1	0.947	17	28.8	1.088	18	14.1	0.871	16	32.9	0.826	15	52.2	1.022	15	57.7	1.247	15	74.6	1.004	17	59.9	0.983	13	16.1	1.019	13	13.1	1.166	11	49	0.971	13	18.9	0.878	10	62.5	0.963
A0A1B0GUA3	KIF1-binding protein OS=Homo sapiens GN=KIF1BP PE=1 SV=1 - [A0A1B0GUA3_HUMAN]	0.5557	9	16	38	135	1.075	13	22.5	1.086	13	19.6	0.592	13	42.4	1.117	13	25.3	0.678	13	32.5	0.637	13	44.1	0.634	12	92.9	0.553	12	98.4	0.705	10	65.9	0.978	15	18.1	1.088	15	5.1	0.778	15	20.6	1.082	15	16.3	0.669	15	67.4	0.711
A6NDG6	Glycerol-3-phosphate phosphatase OS=Homo sapiens GN=PGP PE=1 SV=1 - [PGP_HUMAN]	0.5514	2	15	19	192	1.127	25	27.9	1.186	24	11	0.569	25	55.6	1.088	24	16.7	0.509	20	52.2	0.505	24	66.5	0.464	21	54	0.47	21	47.8	0.512	20	41	1.029	28	24	1.176	28	16.8	0.678	24	49.9	1.109	28	20.6	0.583	25	55.5	0.675
Q01082	Spectrin beta chain, non-erythrocytic 1 OS=Homo sapiens GN=SPTBN1 PE=1 SV=2 - [SPTB2_HUMAN]	0.8536	24	15	262	1232	0.933	16	13.9	1.057	15	3.3	0.763	15	30.1	1.016	16	23.5	0.721	15	21.6	0.8	15	56.1	0.597	14	80.2	0.653	14	84.1	0.752	15	127.3	0.957	18	25.3	1.02	18	15.8	0.749	16	42.3	0.994	17	13.2	0.653	16	81.3	0.626
B3KSH1	Eukaryotic translation initiation factor 3 subunit F OS=Homo sapiens GN=EIF3F PE=2 SV=1 - [B3KSH1_HUMAN]	0.6263	6	15	24	210	1.037	26	17.6	1.088	26	11	0.796	25	44.2	0.976	26	15.3	0.854	24	52.1	0.886	25	51.2	0.89	24	79.4	0.903	21	85.5	0.871	23	58.9	0.965	29	18.9	1.061	29	14.2	0.739	28	40.5	0.959	29	20.5	0.727	27	74.4	0.74
Q9UNS2-2	Isoform 2 of COP9 signalosome complex subunit 3 OS=Homo sapiens GN=COPS3 - [CSN3_HUMAN]	0.6725	7	15	25	122	1.174	15	16.5	1.168	15	23.3	0.553	15	48.5	1.117	15	11.3	0.514	15	44.9	0.668	15	33.6	0.496	14	74.9	0.57	12	46.3	0.587	15	37.8	1.163	16	16.1	1.164	16	13.9	0.62	16	48.6	1.128	16	19	0.639	15	62.2	0.596
C9J0K6	Sorcin OS=Homo sapiens GN=SRI PE=1 SV=1 - [C9J0K6_HUMAN]	0.9935	5	15	24	188	0.932	23	16.8	0.853	23	34.9	1.631	24	35.5	0.907	23	22.2	1.766	23	72.7	1.473	22	82.3	1.737	22	57.9	1.845	22	56.7	1.999	22	51.5	0.951	18	23	0.98	17	21.4	1.683	19	45.5	0.875	18	23.9	1.769	18	44.8	1.75
E7ERK9	Translation initiation factor eIF-2B subunit delta OS=Homo sapiens GN=EIF2B4 PE=1 SV=1 - [E7ERK9_HUMAN]	0.704	13	15	33	114	1.027	15	10.9	1.021	15	15.3	0.963	15	32.4	1.053	15	10.2	0.932	15	44	1.026	15	41.2	0.976	15	65.7	1.012	15	56.7	0.984	15	57.1	1.118	11	7.9	1.059	11	11.4	0.919	11	32.4	1.017	11	7.1	0.957	11	55.3	0.942
Q13617-2	Isoform 2 of Cullin-2 OS=Homo sapiens GN=CUL2 - [CUL2_HUMAN]	0.733	7	15	64	244	0.93	17	8.8	0.94	17	14.7	0.642	16	56.8	1.018	17	14.8	0.571	16	111.8	0.64	16	82.4	0.804	14	115.7	0.612	15	148.9	0.623	14	129.9	1.031	14	23.8	0.973	14	13.3	0.722	14	48.1	1.007	14	21.7	0.864	13	66.1	0.879
H0Y449	Nuclease-sensitive element-binding protein 1 (Fragment) OS=Homo sapiens GN=YBX1 PE=1 SV=1 - [H0Y449_HUMAN]	0.7513	3	15	43	838	0.959	74	25.3	1.097	75	17.1	0.544	73	99.5	0.958	74	24.7	0.478	71	106.2	0.572	74	81.9	0.466	65	117.9	0.504	62	151.5	0.524	67	132	0.966	71	23.6	1.124	71	13	0.631	69	94.8	1.021	71	22.9	0.534	69	131.5	0.615
O00487	26S proteasome non-ATPase regulatory subunit 14 OS=Homo sapiens GN=PSMD14 PE=1 SV=1 - [PSDE_HUMAN]	0.8355	6	15	23	149	1.003	17	20.7	1.058	17	25.6	0.68	16	71.1	1.097	17	11.9	0.582	15	69.3	0.606	16	22	0.543	11	39.8	0.611	13	47.8	0.561	15	63	0.985	18	20.6	1.044	18	18.8	0.502	16	28.2	0.995	18	19.8	0.517	16	92.3	0.435
O14617-5	Isoform 5 of AP-3 complex subunit delta-1 OS=Homo sapiens GN=AP3D1 - [AP3D1_HUMAN]	0.5679	13	15	74	196	1.04	13	13.6	1.028	13	12.1	1.019	13	38.5	0.993	13	10.5	1.118	13	50	0.925	13	21.8	0.958	13	29.6	0.993	12	29.9	0.969	12	25.2	1.093	14	14.7	1.054	13	16.6	0.956	12	55	1.029	13	21.5	0.924	11	35.2	1.004
O14745	Na(+)/H(+) exchange regulatory cofactor NHE-RF1 OS=Homo sapiens GN=SLC9A3R1 PE=1 SV=4 - [NHRF1_HUMAN]	0.8603	6	15	41	195	1.039	17	14.4	1.109	17	16.9	0.628	17	30	0.997	17	15.2	0.628	17	73.8	0.57	17	53.9	0.45	17	107.5	0.723	17	83.9	0.763	16	81.8	1.084	17	17.4	1.086	17	15.6	0.839	17	37.1	1.121	17	10	0.763	17	55.7	0.792
O14802	DNA-directed RNA polymerase III subunit RPC1 OS=Homo sapiens GN=POLR3A PE=1 SV=2 - [RPC1_HUMAN]	0.6799	6	15	108	298	1.072	12	15.6	1.023	12	19	0.846	11	51.5	1.102	12	8.7	0.896	10	96.3	1.042	10	43.6	0.944	11	118.8	0.876	10	159.9	0.741	9	96.4	1.034	12	7.3	0.962	12	16.2	1.036	12	32.5	1.095	14	9.5	0.977	13	86.9	0.873
O43399-5	Isoform 5 of Tumor protein D54 OS=Homo sapiens GN=TPD52L2 - [TPD54_HUMAN]	0.9	12	15	23	163	1.041	10	30.5	1.125	10	11.7	0.58	10	48.5	1.184	10	26.5	0.582	10	80.2	0.627	10	44.3	0.542	10	33.7	0.564	10	50.9	0.497	9	65.4	1.083	19	26.3	1.142	19	13.9	0.615	19	35.2	1.05	19	19.2	0.48	19	44.2	0.664
O60884	DnaJ homolog subfamily A member 2 OS=Homo sapiens GN=DNAJA2 PE=1 SV=1 - [DNJA2_HUMAN]	0.8301	3	15	40	206	0.906	18	35.8	1.021	18	17.2	0.98	18	54.2	0.939	18	13.5	0.96	18	90.9	0.966	18	59.7	0.878	17	85.1	0.941	17	92.9	0.839	18	89.6	1.012	19	18.7	1.028	19	13	0.864	19	34.8	0.985	19	19.1	0.878	19	35.5	0.885
O75436	Vacuolar protein sorting-associated protein 26A OS=Homo sapiens GN=VPS26A PE=1 SV=2 - [VP26A_HUMAN]	0.7982	6	15	33	143	0.956	19	16.7	1.016	19	12.3	0.773	19	35.8	1.004	19	8.5	0.685	19	69.4	0.772	18	42	0.786	18	67.8	0.715	18	49.5	0.701	19	111.6	0.953	14	7.1	0.995	14	20.7	0.73	14	52.6	0.951	14	22.2	0.618	13	39.7	0.802
O75494-2	Isoform 2 of Serine/arginine-rich splicing factor 10 OS=Homo sapiens GN=SRSF10 - [SRS10_HUMAN]	0.7395	11	15	39	243	0.815	28	36.2	0.721	28	33.5	2.619	29	49.6	0.838	27	31	2.972	28	43.3	2.651	29	48.2	2.971	28	59.6	2.526	28	54.3	2.763	28	61.8	0.899	31	35	0.819	31	33.5	2.658	32	66.4	0.99	31	38.3	2.986	31	75.7	2.347
O75947	ATP synthase subunit d, mitochondrial OS=Homo sapiens GN=ATP5H PE=1 SV=3 - [ATP5H_HUMAN]	0.8696	4	15	19	216	1.027	32	12.5	0.981	32	14.9	0.616	29	48.1	1.055	32	21.8	0.549	28	43.8	0.597	29	47.4	0.657	25	67.1	0.592	25	59.7	0.617	25	46.9	0.969	23	18.7	1.063	24	22.2	0.734	21	49	1.098	24	30.1	0.668	20	40.1	0.629
O75955	Flotillin-1 OS=Homo sapiens GN=FLOT1 PE=1 SV=3 - [FLOT1_HUMAN]	0.7002	22	15	42	222	1.111	16	13.8	1.007	16	7.8	0.713	15	36	1.066	16	20.1	0.696	16	49.5	0.683	15	50.3	0.601	16	135.9	0.738	15	92.4	0.658	15	85.6	1.031	20	8.7	1.024	20	9	0.752	20	19.1	1.045	20	10.6	0.649	20	56.9	0.758
O76070	Gamma-synuclein OS=Homo sapiens GN=SNCG PE=1 SV=2 - [SYUG_HUMAN]	0.9055	7	15	18	148	1.024	21	18.8	1.156	21	15.8	0.599	20	76.5	1.086	21	9.8	0.423	21	123.5	0.562	21	90.6	0.545	20	146.9	0.584	20	125	0.636	19	153.8	1.099	23	12.7	1.222	23	10.6	0.547	22	66.6	1.102	23	15.7	0.468	22	147.2	0.486
O94874	E3 UFM1-protein ligase 1 OS=Homo sapiens GN=UFL1 PE=1 SV=2 - [UFL1_HUMAN]	0.6839	4	15	60	173	0.923	12	12.8	0.888	12	8.9	1.01	11	54.8	0.905	12	7.1	1.115	11	69.9	0.892	11	54.4	1.209	10	78.2	1.136	10	69.9	1.127	11	68.8	0.98	11	6	0.893	11	17.3	1.08	11	50.9	0.965	11	11.4	1.048	11	59.9	1.189
O95218	Zinc finger Ran-binding domain-containing protein 2 OS=Homo sapiens GN=ZRANB2 PE=1 SV=2 - [ZRAB2_HUMAN]	0.8061	2	15	49	367	0.842	34	30.4	0.808	33	28.8	2.621	34	76.1	0.888	32	37	3.348	34	86.6	3.05	34	81.4	4.23	34	84.2	4.502	34	95.9	4.641	34	111.2	0.838	37	23.2	0.834	37	38.7	2.883	37	57.9	0.837	33	27.3	3.309	37	90.5	3.011
O95801	Tetratricopeptide repeat protein 4 OS=Homo sapiens GN=TTC4 PE=1 SV=3 - [TTC4_HUMAN]	0.7158	1	15	33	122	1.016	16	20	1.093	16	23.2	0.677	16	84.5	1.081	16	22	0.709	16	86.2	0.729	16	95.7	0.793	16	62.8	0.733	15	108.7	0.807	16	90.6	1.055	17	26.5	1.169	17	18.8	0.715	17	62	1.135	17	18.2	0.826	16	74	0.816
P11766	Alcohol dehydrogenase class-3 OS=Homo sapiens GN=ADH5 PE=1 SV=4 - [ADHX_HUMAN]	0.6925	8	15	29	146	0.985	20	20.4	1.061	20	9.2	0.728	20	70.1	1.063	20	23.2	0.618	19	56.2	0.646	20	60.7	0.521	20	141.6	0.645	17	115	0.846	17	144.7	1.039	19	17	1.031	19	18	0.651	19	69	0.942	19	21.7	0.619	19	74.3	0.661
P11802	Cyclin-dependent kinase 4 OS=Homo sapiens GN=CDK4 PE=1 SV=2 - [CDK4_HUMAN]	0.6634	116	15	21	146	1.094	19	9.1	1.068	18	23.4	0.908	18	71.9	1.137	18	11.6	0.803	19	96.7	0.744	19	82.2	0.615	15	104.4	0.706	15	150.1	0.823	16	80.1	1.046	14	18.3	1.043	13	29	0.545	13	68.7	1.071	13	14.7	0.506	13	128.3	0.861
P13645	Keratin, type I cytoskeletal 10 OS=Homo sapiens GN=KRT10 PE=1 SV=6 - [K1C10_HUMAN]	0.6336	3	15	37	161	0.939	14	26.4	1.122	14	21.7	1.391	13	85.3	0.753	13	23	1.397	13	84.1	1.398	13	67.4	1.111	13	58.4	1.54	13	92.6	1.319	12	85.5	0.91	13	26.1	1.078	13	10.9	1.426	13	54.2	0.847	13	22.2	1.516	13	46.4	1.262
P14550	Alcohol dehydrogenase [NADP(+)] OS=Homo sapiens GN=AKR1A1 PE=1 SV=3 - [AK1A1_HUMAN]	0.8215	4	15	27	171	1.048	21	16.7	1.114	21	15	0.718	21	35.3	1.116	21	15.7	0.623	20	73.2	0.73	20	34.8	0.843	19	62.9	0.895	19	68.6	0.743	20	99.3	1.091	17	9.4	1.101	17	12.1	0.61	16	55.8	1.043	17	16.9	0.698	16	68.3	0.656
P20618	Proteasome subunit beta type-1 OS=Homo sapiens GN=PSMB1 PE=1 SV=2 - [PSB1_HUMAN]	0.9502	3	15	30	189	1.031	24	18.6	1.094	24	13.8	0.712	24	45	1.068	24	14.2	0.581	23	47.6	0.647	23	48.9	0.608	23	48.5	0.638	23	83.3	0.688	21	68.8	1.038	19	14.8	1.059	19	8.3	0.705	19	47.5	1.016	19	12.5	0.669	19	36.3	0.709
P30044-2	Isoform Cytoplasmic+peroxisomal of Peroxiredoxin-5, mitochondrial OS=Homo sapiens GN=PRDX5 - [PRDX5_HUMAN]	0.8086	4	15	19	220	0.979	35	28.4	1.162	35	13.2	0.521	32	108.5	1.028	35	25.7	0.59	29	128.6	0.519	31	89.9	0.576	27	198.1	0.479	26	113.2	0.482	27	189	1.063	35	34.8	1.113	36	16.5	0.69	33	68.7	1.024	35	15.8	0.598	29	87.4	0.485
P31946	14-3-3 protein beta/alpha OS=Homo sapiens GN=YWHAB PE=1 SV=3 - [1433B_HUMAN]	0.8902	9	15	33	666	1.04	37	26	1.128	37	10.5	0.875	37	50.8	1.054	37	30.4	0.717	37	82.7	0.851	37	56.6	0.696	35	113.8	0.981	35	86.4	0.913	37	89.4	1.005	37	25	1.152	37	16.6	0.84	36	69.2	1.043	37	31.4	0.767	36	78.4	0.815
P41223	Protein BUD31 homolog OS=Homo sapiens GN=BUD31 PE=1 SV=2 - [BUD31_HUMAN]	0.8889	9	15	22	160	0.925	23	21.9	0.816	23	34.4	1.877	23	59.9	0.821	23	24.2	2.379	23	53.8	2.109	23	47.4	1.958	23	45.4	1.966	23	59.3	2.112	23	56.3	0.913	26	31.6	0.8	26	24.2	1.958	26	90.9	0.862	26	24.3	2.587	26	66.7	2.139
P49023	Paxillin OS=Homo sapiens GN=PXN PE=1 SV=3 - [PAXI_HUMAN]	0.714	15	15	39	139	1.153	10	14.3	1.139	10	4.7	0.831	10	38.8	1.141	10	14.1	0.889	10	37.9	0.797	10	35	0.719	10	52.3	0.879	10	45.3	0.89	10	62.8	1.014	13	23.7	1.201	13	10.9	0.876	13	56.1	1.132	13	14.4	0.718	13	146.6	0.913
P49711	Transcriptional repressor CTCF OS=Homo sapiens GN=CTCF PE=1 SV=1 - [CTCF_HUMAN]	0.4966	14	15	50	214	0.693	14	44.9	0.499	13	33.7	3.304	14	68.1	0.711	13	37.2	3.987	14	75.3	2.827	14	78.8	3.242	14	42	2.978	14	59	3.015	13	88.3	0.679	18	58.4	0.684	19	57.7	2.544	19	74.9	0.622	19	76.6	3.728	19	77.2	2.434
P49903	Selenide, water dikinase 1 OS=Homo sapiens GN=SEPHS1 PE=1 SV=2 - [SPS1_HUMAN]	0.8061	11	15	29	172	1.038	21	21	1.015	21	12.9	1.145	21	29.5	1.009	21	13.6	1.202	21	38.6	1.088	21	32.5	1.002	21	97.2	1.014	21	71.7	1.14	20	90.2	1.042	22	24.6	1.01	22	15.4	1.198	22	44.1	1.052	22	30.6	1.126	22	48.6	1.273
P51531-2	Isoform Short of Probable global transcription activator SNF2L2 OS=Homo sapiens GN=SMARCA2 - [SMCA2_HUMAN]	0.5865	34	15	123	420	0.891	11	19	0.769	11	22.2	2.239	11	23.2	0.903	11	12	2.835	11	36	2.615	11	33.3	1.978	11	32.4	1.889	11	93.2	2.051	11	52.3	0.773	17	26.6	0.772	17	26	1.734	17	34.3	0.817	17	20.4	2.323	17	49.3	2.125
P55145	Mesencephalic astrocyte-derived neurotrophic factor OS=Homo sapiens GN=MANF PE=1 SV=3 - [MANF_HUMAN]	0.6978	3	15	21	130	1.037	17	20	1.004	17	7.9	1.105	17	39.1	1.041	17	15.1	0.918	17	59.9	0.877	17	57.2	0.724	17	53	0.545	17	84.5	0.597	17	60.3	1.078	19	16.9	1.092	19	25.3	0.845	19	62.2	1.067	19	24.1	0.807	18	41.2	0.744
P55263	Adenosine kinase OS=Homo sapiens GN=ADK PE=1 SV=2 - [ADK_HUMAN]	0.6077	5	15	32	131	1.039	14	20.5	1.122	14	25	0.662	13	38.7	1.034	14	24.2	0.744	12	54.3	0.633	14	51.8	0.796	13	107.8	0.658	11	78.8	0.642	13	49.2	0.962	13	19.7	1.101	13	18.6	0.642	12	65.4	1.071	13	15.4	0.433	12	39.1	0.651
P62847	40S ribosomal protein S24 OS=Homo sapiens GN=RPS24 PE=1 SV=1 - [RS24_HUMAN]	0.8195	6	15	26	251	1.134	35	14.5	1.179	35	15.5	0.723	35	42.3	1.088	35	24.9	0.714	34	61.9	0.694	34	54.7	0.758	31	73.1	0.754	32	77.1	0.771	31	67	1.121	36	20.1	1.151	36	16.2	0.772	36	52.1	1.015	36	14	0.798	35	51.4	0.701
P62851	40S ribosomal protein S25 OS=Homo sapiens GN=RPS25 PE=1 SV=1 - [RS25_HUMAN]	0.8	3	15	26	219	1.003	27	31.9	1.137	27	12.2	0.589	27	69.2	1.033	27	17.7	0.541	27	84	0.606	27	88.3	0.546	24	112.2	0.594	23	82.1	0.539	25	118.1	1.093	33	23.6	1.194	33	8.1	0.566	32	58.8	1.053	33	11.3	0.486	32	68.5	0.555
P62910	60S ribosomal protein L32 OS=Homo sapiens GN=RPL32 PE=1 SV=2 - [RL32_HUMAN]	0.6667	4	15	21	296	1.036	43	20.1	1.154	43	11.5	0.903	42	44.4	1.087	43	22.7	1.03	42	46.4	0.953	43	43.2	1.032	39	67.4	0.807	36	78.1	0.939	39	52.4	1.087	44	26.9	1.128	44	18.6	0.796	44	54.2	1.01	44	30.1	0.876	44	65.8	0.877
Q00403	Transcription initiation factor IIB OS=Homo sapiens GN=GTF2B PE=1 SV=1 - [TF2B_HUMAN]	0.9905	3	15	45	226	0.946	17	20.3	1.054	17	6.3	1.059	17	24.7	0.993	17	11.6	0.946	17	53.2	1.091	17	36.3	1.358	17	51.5	1.128	16	57.6	1.148	17	59.3	0.972	14	16.3	0.92	14	20.6	0.971	14	30.6	0.981	14	14	1.129	14	28.8	0.963
Q01433	AMP deaminase 2 OS=Homo sapiens GN=AMPD2 PE=1 SV=2 - [AMPD2_HUMAN]	0.5449	12	15	64	201	1.029	9	10.9	1.124	9	8.8	0.728	9	29.1	1.104	9	8.9	0.764	8	36.3	0.787	9	27.6	0.932	8	29.1	0.928	8	16.1	0.966	8	22.1	0.996	10	6.9	1.168	10	9.6	0.703	10	40	1.005	10	9.5	0.625	9	49.4	0.693
Q01970	1-phosphatidylinositol 4,5-bisphosphate phosphodiesterase beta-3 OS=Homo sapiens GN=PLCB3 PE=1 SV=2 - [PLCB3_HUMAN]	0.4911	6	15	76	232	0.981	12	19.5	1.019	12	13.8	0.963	12	39.6	0.942	12	23.1	0.998	12	62.5	1.059	12	36.5	0.912	12	47.5	0.987	12	129.5	1.054	11	99.4	0.991	11	15.2	0.977	11	13	0.975	11	35.4	1.046	11	16.5	0.827	11	73.7	1.093
[truncated: 7,563 more rows]
[truncated: 68 more columns]
